# Supplementary material for: Condensation of Ede1 promotes the initiation of endocytosis
Source: eLife. 2022 Apr 12;11:e72865. doi: 10.7554/eLife.72865 (PMC9064294; doi:10.7554/eLife.72865)
Supplement: Figure 1—source data 1. [file elife-72865-fig1-data1.csv]

second_ede1	dataset	cells_condensates	cells_total	fraction
EDE1-GFP	1	41	47	0.8723
EDE1-GFP	2	52	57	0.9123
EDE1-GFP	3	59	61	0.9672
EDE1	1	34	40	0.85
EDE1	2	45	56	0.8036
EDE1	3	65	67	0.9701
ede1Δ	1	0	42	0
ede1Δ	2	2	54	0.037
ede1Δ	3	6	70	0.0857
