# Supplementary material for: Condensation of Ede1 promotes the initiation of endocytosis
Source: eLife. 2022 Apr 12;11:e72865. doi: 10.7554/eLife.72865 (PMC9064294; doi:10.7554/eLife.72865)
Supplement: Figure 2—source data 1. [file elife-72865-fig2-data1.csv]

id	time	patch	cell	background	patch_bg-corrected	cell_bg-corrected	normalized
20160322_MKY0532_01	-2.639	321.1779661	229.1844434	208.4060106	112.7719555	20.77843274	0.981456175
20160322_MKY0532_01	-2.436	318.2330508	228.4491276	208.3198291	109.9132217	20.12929844	0.988536567
20160322_MKY0532_01	-2.233	317.8983051	228.0505038	208.2281968	109.6701083	19.82230699	1.004047328
20160322_MKY0532_01	-2.03	316.9830508	227.8998525	208.2164113	108.7666395	19.68344123	1.002574088
20160322_MKY0532_01	-1.827	315.5	227.6805112	208.1250737	107.3749263	19.55543752	0.995066053
20160322_MKY0532_01	-1.624	316.4533898	227.6131728	208.192693	108.2606968	19.42047978	1.013036654
20160322_MKY0532_01	-1.421	317.1694915	227.5967068	208.0714496	109.0980419	19.52525719	1.015819273
20160322_MKY0532_01	-1.218	316.1186441	227.5158516	207.9907189	108.1279252	19.52513265	1.005167845
20160322_MKY0532_01	-1.015	316.0635593	227.2940526	207.9742192	108.0893401	19.31983338	1.017363982
20160322_MKY0532_01	-0.812	311.9872881	227.1957483	207.9550678	104.0322204	19.24068057	0.977065293
20160322_MKY0532_01	-0.609	313.3220339	227.1120668	208.0381556	105.2838783	19.07391128	1.00128487
20160322_MKY0532_01	0	219.2372881	221.2334726	207.7038892	11.53339892	13.52958338	0
20160322_MKY0532_01	0.203	219.4279661	221.1757189	207.6262522	11.80171389	13.54946664	0.003979904
20160322_MKY0532_01	0.406	220.5211864	221.1603588	207.6305245	12.89066199	13.52983436	0.021517536
20160322_MKY0532_01	0.609	221.0338983	221.3187515	207.5564231	13.47747521	13.76232844	0.027211966
20160322_MKY0532_01	0.812	221.1991525	221.2358073	207.6272834	13.5718691	13.60852388	0.03107449
20160322_MKY0532_01	1.015	221.8050847	221.2697223	207.6875368	14.11754792	13.58218546	0.040108385
20160322_MKY0532_01	1.218	222.2754237	221.1515114	207.5835298	14.69189397	13.56798167	0.049423118
20160322_MKY0532_01	1.421	221.9661017	221.0946178	207.5446376	14.4214641	13.54998025	0.045450141
20160322_MKY0532_01	1.624	222.6313559	221.1363971	207.4356217	15.19573425	13.70077546	0.055060829
20160322_MKY0532_01	1.827	222.5847458	221.2045957	207.4603712	15.12437452	13.74422448	0.053194803
20160322_MKY0532_01	2.03	222.9915254	221.0668469	207.4434296	15.54809584	13.62341731	0.061960633
20160322_MKY0532_01	2.233	223.7584746	221.3175227	207.5265174	16.23195719	13.79100535	0.069623394
20160322_MKY0532_01	2.436	224.0169492	221.1490538	207.3940778	16.62287137	13.75497604	0.076381716
20160322_MKY0532_01	2.639	224.0211864	221.1443844	207.489835	16.53135144	13.65454937	0.076850629
20160322_MKY0532_01	2.842	224.4110169	221.1656427	207.466706	16.944311	13.69893671	0.082476162
20160322_MKY0532_01	3.045	224.0127119	221.1034652	207.4043901	16.60832176	13.69907513	0.077211811
20160322_MKY0532_01	3.248	225.1355932	221.1012534	207.3375074	17.79808585	13.76374601	0.094534179
20160322_MKY0532_01	3.451	225.4661017	220.9668223	207.411756	18.05434565	13.55506628	0.102860658
20160322_MKY0532_01	3.654	225.5805085	220.970263	207.4910136	18.08949492	13.47924941	0.105027279
20160322_MKY0532_01	3.857	226.0169492	220.9748095	207.5058928	18.5110564	13.46891678	0.111962707
20160322_MKY0532_01	4.06	226.2076271	220.8867044	207.3628462	18.84478092	13.52385815	0.116058815
20160322_MKY0532_01	4.263	227.0211864	220.8695011	207.4104302	19.61075627	13.45907094	0.129707049
20160322_MKY0532_01	4.466	227.5762712	220.8965348	207.382145	20.19412622	13.51438981	0.137688089
20160322_MKY0532_01	4.669	227.5211864	220.9243057	207.348409	20.17277748	13.57589677	0.135898371
20160322_MKY0532_01	4.872	227.9449153	220.9653478	207.3476724	20.59724289	13.61767539	0.141607334
20160322_MKY0532_01	5.075	228.5974576	220.9293438	207.3236594	21.27379823	13.60568442	0.15256105
20160322_MKY0532_01	5.278	227.7542373	220.8914967	207.246317	20.50792026	13.64517965	0.139548938
20160322_MKY0532_01	5.481	227.8262712	220.9848857	207.3068651	20.51940613	13.67802067	0.138954936
20160322_MKY0532_01	5.684	228.6059322	220.890145	207.3677077	21.23822448	13.52243728	0.154061719
20160322_MKY0532_01	5.887	228.9110169	220.9019415	207.3893636	21.52165337	13.51257793	0.158807387
20160322_MKY0532_01	6.09	228.7372881	220.8328828	207.3095168	21.42777134	13.52336598	0.157045496
20160322_MKY0532_01	6.293	229.4661017	220.775129	207.2248085	22.24129321	13.55032054	0.169249113
20160322_MKY0532_01	6.496	229.9533898	220.9134923	207.317914	22.63547587	13.59557829	0.174296915
20160322_MKY0532_01	6.699	230.4915254	220.862374	207.3292575	23.16226791	13.53311654	0.184296301
20160322_MKY0532_01	6.902	230.7330508	220.8237896	207.3090748	23.42397601	13.51471479	0.188950567
20160322_MKY0532_01	7.105	230.6737288	220.8015483	207.2075722	23.46615663	13.59397611	0.187448239
20160322_MKY0532_01	7.308	230.4957627	220.7656672	207.189452	23.30631074	13.57621527	0.185406835
20160322_MKY0532_01	7.511	231.0889831	220.7469894	207.3129051	23.77607792	13.4340843	0.196805023
20160322_MKY0532_01	7.714	231.6991525	220.6912018	207.2037419	24.49541065	13.48745987	0.206744118
20160322_MKY0532_01	7.917	231.4661017	220.7429344	207.2370359	24.22906575	13.50589844	0.201981514
20160322_MKY0532_01	8.12	231.6779661	220.6070288	207.2846199	24.39334618	13.32240884	0.209927599
20160322_MKY0532_01	8.323	231.6313559	220.6684689	207.077637	24.55371893	13.5908319	0.204701038
20160322_MKY0532_01	8.526	232.5762712	220.6892357	207.1546847	25.42158645	13.53455095	0.220068934
20160322_MKY0532_01	8.729	233.6313559	220.8350946	207.3020035	26.3293524	13.53309108	0.234502585
20160322_MKY0532_01	8.932	233.4915254	220.6956255	207.2128757	26.27864976	13.4827498	0.235254229
20160322_MKY0532_01	9.135	233.0381356	220.6830917	207.2299646	25.80817095	13.45312703	0.22867242
20160322_MKY0532_01	9.338	233.5508475	220.5479233	207.1275781	26.42326938	13.42034524	0.239510358
20160322_MKY0532_01	9.541	234.2330508	220.686901	207.1895993	27.04345155	13.49730167	0.246959447
20160322_MKY0532_01	9.744	234.0508475	220.6462276	207.1258103	26.9250372	13.52041732	0.244345659
20160322_MKY0532_01	9.947	235.2584746	220.6662571	207.1655863	28.09288825	13.50067074	0.263528123
20160322_MKY0532_01	10.15	235.1652542	220.6449988	207.2855038	27.87975041	13.35949494	0.264822871
20160322_MKY0532_01	10.353	234.3177966	220.6236176	207.1968179	27.1209787	13.42679968	0.25045517
20160322_MKY0532_01	10.556	235.1864407	220.5894569	207.2417501	27.94469053	13.34770672	0.266262013
20160322_MKY0532_01	10.759	235.3050847	220.5138855	207.2050678	28.10001698	13.30881771	0.270078199
20160322_MKY0532_01	10.962	235.1567797	220.5407963	207.132145	28.0246347	13.4086513	0.265499655
20160322_MKY0532_01	11.165	235.0338983	220.4974195	207.1632292	27.87066908	13.33419029	0.265526378
20160322_MKY0532_01	11.368	236.1271186	220.5942492	207.1010607	29.02605795	13.49318851	0.278612302
20160322_MKY0532_01	11.571	236.0677966	220.5172032	207.1411314	28.9266652	13.37607184	0.281058869
20160322_MKY0532_01	11.774	235.7669492	220.4529368	207.1380377	28.62891144	13.31489913	0.278392906
20160322_MKY0532_01	11.977	236.1228814	220.5533301	207.192693	28.93018837	13.36063707	0.2816514
20160322_MKY0532_01	12.18	236.8898305	220.5312116	207.1781084	29.71172208	13.35310317	0.294469596
20160322_MKY0532_01	12.383	236.5211864	220.5179405	207.1322923	29.38889416	13.38564825	0.288135063
20160322_MKY0532_01	12.586	237.0466102	220.6617105	207.1331762	29.91343398	13.5285343	0.291478267
20160322_MKY0532_01	12.789	237.2161017	220.5814696	207.1392163	30.07688543	13.44225339	0.297131581
20160322_MKY0532_01	12.992	237.6483051	220.4440895	207.1979965	30.45030862	13.24609299	0.310287889
20160322_MKY0532_01	13.195	237.3898305	220.5146228	207.1829699	30.20686056	13.33165281	0.303205324
20160322_MKY0532_01	13.398	237.7415254	220.4084542	207.215822	30.52570339	13.19263213	0.313512385
20160322_MKY0532_01	13.601	238.0762712	220.5579995	207.1433412	30.93293	13.41465832	0.311809089
20160322_MKY0532_01	13.804	238.0677966	220.4117719	207.1819387	30.88585789	13.22983322	0.317956728
20160322_MKY0532_01	14.007	238.8050847	220.2882772	207.1613141	31.64377066	13.12696313	0.334267928
20160322_MKY0532_01	14.21	238.7161017	220.3419759	207.0542133	31.66188838	13.2877626	0.328302285
20160322_MKY0532_01	14.413	238.6483051	220.2697223	207.0795522	31.56875293	13.19017014	0.330569653
20160322_MKY0532_01	14.616	239.2076271	220.291595	207.14835	32.05927709	13.14324496	0.340409394
20160322_MKY0532_01	14.819	239.059322	220.2152863	207.1287566	31.9305654	13.08652968	0.340567251
20160322_MKY0532_01	15.022	240.0211864	220.3511919	207.06099	32.96019646	13.29020196	0.349165775
20160322_MKY0532_01	15.225	239.7288136	220.329565	207.0586329	32.67018068	13.27093212	0.345250083
20160322_MKY0532_01	15.428	240.2457627	220.2753748	207.0232764	33.22248634	13.25209842	0.354941615
20160322_MKY0532_01	15.631	240.690678	220.2770951	207.0500884	33.64058958	13.22700672	0.362743138
20160322_MKY0532_01	15.834	240.5677966	220.2425657	207.067914	33.49988264	13.17465178	0.362620177
20160322_MKY0532_01	16.037	241.279661	220.3331285	207.044343	34.23531806	13.28878558	0.369807715
20160322_MKY0532_01	16.24	241.2118644	220.2856967	207.0561285	34.15573595	13.22956827	0.370991108
20160322_MKY0532_01	16.443	241.3135593	220.344925	207.0989982	34.21456109	13.24592681	0.371259817
20160322_MKY0532_01	16.646	241.2288136	220.3173999	207.0654095	34.16340401	13.25199031	0.370178109
20160322_MKY0532_01	16.849	241.1144068	220.3253871	207.0798468	34.03455999	13.24554029	0.368360609
20160322_MKY0532_01	17.052	241.6101695	220.3260015	207.1837065	34.42646295	13.14229493	0.379088422
20160322_MKY0532_01	17.255	242.0762712	220.3607766	207.1062169	34.97005433	13.25455975	0.383126877
20160322_MKY0532_01	17.458	241.7711864	220.2629639	207.0944313	34.67675509	13.16853252	0.382046283
20160322_MKY0532_01	17.661	240.9533898	220.2805358	207.1222746	33.83111523	13.15826116	0.368700054
20160322_MKY0532_01	17.864	241.4745763	220.199189	207.0044196	34.47015671	13.19476943	0.377563934
20160322_MKY0532_01	18.067	241.1779661	220.228926	207.0574543	34.12051177	13.1714717	0.372860394
20160322_MKY0532_01	18.27	240.6822034	220.2413369	207.1611668	33.52103663	13.08017017	0.366907411
20160322_MKY0532_01	18.473	241.0508475	220.1743672	207.0717443	33.9791032	13.10262291	0.37346527
20160322_MKY0532_01	18.676	241.1991525	220.1257066	207.067472	34.13168053	13.05823455	0.377863085
20160322_MKY0532_01	18.879	241.1355932	220.0419022	207.0274013	34.10819192	13.01450089	0.379360203
20160322_MKY0532_01	19.082	240.9025424	219.9884493	207.1286093	33.77393306	12.85983994	0.380545876
20160322_MKY0532_01	19.285	241.9661017	219.9933645	206.9345905	35.03151124	13.05877401	0.39262242
20160322_MKY0532_01	19.488	242.4576271	220.0097075	207.0126694	35.4449577	12.99703813	0.402180444
20160322_MKY0532_01	19.691	241.3220339	219.9255345	207.0033883	34.31864557	12.9221462	0.386872434
20160322_MKY0532_01	19.894	242.220339	219.9696486	207.0802887	35.14005024	12.88935982	0.401993168
20160322_MKY0532_01	20.097	241.8389831	220.1099779	206.9986741	34.84030892	13.11130375	0.387188202
20160322_MKY0532_01	20.3	242.7245763	220.1377488	207.010607	35.71396932	13.12714188	0.400778228
20160322_MKY0532_01	20.503	242.8177966	220.068813	206.9779022	35.83989443	13.0909108	0.404457217
20160322_MKY0532_01	20.706	243.7372881	220.0211354	207.0708603	36.66642779	12.95027507	0.424527613
20160322_MKY0532_01	20.909	243.3728814	220.1488081	207.0723335	36.30054783	13.07647453	0.412663039
20160322_MKY0532_01	21.112	243.6483051	220.0710248	206.9703889	36.67791616	13.1006359	0.417744319
20160322_MKY0532_01	21.315	243.9449153	220.1178422	207.0738067	36.87110854	13.0440355	0.423527896
20160322_MKY0532_01	21.518	244.2330508	220.0779061	207.1059222	37.12712863	12.9719839	0.431130181
20160322_MKY0532_01	21.721	243	219.9345048	206.9571302	36.04286977	12.97737456	0.412951101
20160322_MKY0532_01	21.924	243.8983051	219.9775129	206.9453447	36.95296036	13.03216818	0.425427515
20160322_MKY0532_01	22.127	244.0635593	220.026665	206.9453447	37.1182146	13.0813203	0.425851981
20160322_MKY0532_01	22.33	243.9872881	220.0484148	207.0070713	36.98021683	13.04134354	0.425447905
20160322_MKY0532_01	22.533	244.7838983	219.9873433	207.0274013	37.75649701	12.95994203	0.44211886
20160322_MKY0532_01	22.736	244.9322034	219.9029246	206.9901296	37.94207375	12.91279491	0.447483983
20160322_MKY0532_01	22.939	244.6144068	219.9466699	207.0266647	37.58774208	12.92000524	0.44124868
20160322_MKY0532_01	23.142	245.2627119	219.8892848	206.9538892	38.30882265	12.93539562	0.452465065
20160322_MKY0532_01	23.345	245.8771186	219.896289	206.9753978	38.90172088	12.92089125	0.463022396
20160322_MKY0532_01	23.548	245.3559322	220.0237159	206.9627283	38.39320386	13.06098756	0.447741712
20160322_MKY0532_01	23.751	245.0042373	219.9397886	206.9490277	38.05520959	12.99076095	0.445569103
20160322_MKY0532_01	23.954	244.8940678	219.8626198	207.016647	37.87742077	12.84597278	0.44968328
20160322_MKY0532_01	24.157	244.970339	219.8516835	206.9530053	38.01733368	12.89867816	0.449425596
20160322_MKY0532_01	24.36	245.2923729	219.9134923	206.8777254	38.41464748	13.03576686	0.449314691
20160322_MKY0532_01	24.563	245.3728814	219.8298108	206.990277	38.3826044	12.83953381	0.458441421
20160322_MKY0532_01	24.766	245.6016949	219.8138363	207.0047142	38.59698071	12.80912212	0.463554489
20160322_MKY0532_01	24.969	245.0932203	219.6897272	206.8753683	38.21785204	12.81435891	0.456943158
20160322_MKY0532_01	25.172	245.6610169	219.6518801	206.8264585	38.83455849	12.82542161	0.466706916
20160322_MKY0532_01	25.375	245.1483051	219.6070288	206.8927519	38.25555317	12.71427684	0.462615735
20160322_MKY0532_01	25.578	245.7669492	219.6531089	206.9347378	38.83221138	12.7183711	0.472134884
20160322_MKY0532_01	25.781	245.5042373	219.756697	207.0671774	38.43705992	12.6895196	0.46694367
20160322_MKY0532_01	25.984	243.940678	219.6511428	206.9832057	36.95747231	12.66793713	0.442994056
20160322_MKY0532_01	26.187	244.3686441	219.6636766	207.0359458	37.33269828	12.62773079	0.451361476
20160322_MKY0532_01	26.39	244.5720339	219.771074	206.9569829	37.61505099	12.81409106	0.446864569
20160322_MKY0532_01	26.593	245.1228814	219.7249939	206.9633176	38.15956374	12.76167624	0.458604607
20160322_MKY0532_01	26.796	244.6525424	219.7264684	206.9497643	37.70277808	12.77670413	0.450180315
20160322_MKY0532_01	26.999	243.3940678	219.6104694	206.9868886	36.40717917	12.62358078	0.435841303
20160322_MKY0532_01	27.202	244.0084746	219.5980585	206.9437242	37.06475036	12.65433427	0.445485541
20160322_MKY0532_01	27.405	243.3135593	219.6051855	206.9338539	36.37970546	12.67133169	0.433044566
20160322_MKY0532_01	27.608	243.5550847	219.5350209	207.0113435	36.5437412	12.52367734	0.44311624
20160322_MKY0532_01	27.811	243.6440678	219.6739985	206.8895109	36.75455689	12.78448762	0.433883223
20160322_MKY0532_01	28.014	244.1355932	219.5457115	206.9605186	37.17507466	12.58519291	0.450818307
20160322_MKY0532_01	28.217	243.9745763	219.6328336	206.83736	37.13721622	12.79547357	0.439769404
20160322_MKY0532_01	28.42	242.720339	219.5755714	206.9559517	35.7643873	12.61961971	0.42510819
20160322_MKY0532_01	28.623	242.8177966	219.3910052	206.9017384	35.91605825	12.4892668	0.434059147
20160322_MKY0532_01	28.826	244.0508475	219.4847628	206.9749558	37.07589165	12.50980704	0.452936164
20160322_MKY0532_01	29.029	245.0677966	219.6398378	206.983353	38.08444363	12.65648482	0.462662838
20160322_MKY0532_01	29.232	245.6567797	219.6039567	206.996317	38.66046263	12.60763972	0.474965322
20160322_MKY0532_01	29.435	245.7457627	219.5819612	206.9568356	38.78892712	12.62512558	0.47623712
20160322_MKY0532_01	29.638	243.8347458	219.594495	206.9789334	36.85581235	12.61556155	0.443863716
20160322_MKY0532_01	29.841	243.8644068	219.5168346	207.0054508	36.85895598	12.51138381	0.449136273
20160322_MKY0532_01	30.044	243.6228814	219.41681	206.9021803	36.72070104	12.51462971	0.446602327
20160322_MKY0532_01	30.247	244.5720339	219.4450725	206.8607837	37.71125016	12.58428876	0.46000429
20160322_MKY0532_01	30.45	244.8686441	219.5491521	207.0083972	37.8602469	12.54075495	0.464784824
20160322_MKY0532_01	30.653	244.7711864	219.4287294	206.9391573	37.83202911	12.48957208	0.466954289
20160322_MKY0532_01	30.856	244.7542373	219.4184075	206.9395993	37.814638	12.47880818	0.467215837
20160322_MKY0532_01	31.059	243.5932203	219.3905136	206.9099882	36.68323212	12.48052543	0.447678384
20160322_MKY0532_01	31.262	243.8347458	219.3097813	206.9624337	36.87231206	12.34734757	0.457764733
20160322_MKY0532_01	31.465	244.1779661	219.3186287	206.8712434	37.30672273	12.44738528	0.460103051
20160322_MKY0532_01	31.668	243.7838983	219.2611207	206.9225103	36.86138799	12.33861036	0.458028449
20160322_MKY0532_01	31.871	244.5	219.3154338	206.8665292	37.63347083	12.4489046	0.465655396
20160322_MKY0532_01	32.074	245.6186441	219.3652003	206.8877431	38.73090099	12.47745722	0.483039958
20160322_MKY0532_01	32.277	245.0211864	219.2543623	206.8143783	38.20680813	12.43998394	0.476007805
20160322_MKY0532_01	32.48	244.470339	219.284345	206.8061285	37.66421052	12.47821659	0.464660446
20160322_MKY0532_01	32.683	245.690678	219.2625952	207.0222451	38.66843283	12.24035009	0.494844575
20160322_MKY0532_01	32.886	244.8855932	219.370607	206.9144078	37.97118544	12.45619925	0.471091992
20160322_MKY0532_01	33.089	245.2966102	219.3115016	206.847967	38.44864317	12.4635346	0.478925424
20160322_MKY0532_01	33.292	245.8305085	219.1826001	206.847967	38.98254147	12.33463315	0.495127369
20160322_MKY0532_01	33.495	245.4915254	219.2585402	206.9577195	38.53380592	12.30082068	0.489164961
20160322_MKY0532_01	33.698	245.4830508	219.028754	206.8311727	38.65187819	12.19758134	0.496929733
20160322_MKY0532_01	33.901	244.3983051	219.1549521	206.8217443	37.57656083	12.33320782	0.470749312
20160322_MKY0532_01	34.104	243.6186441	219.0627918	206.945934	36.67271007	12.11685784	0.466417215
20160322_MKY0532_01	34.307	244.6864407	219.211477	206.8865645	37.79987615	12.3249125	0.475076325
20160322_MKY0532_01	34.51	244.8686441	219.2743917	206.8497348	38.01890924	12.42465692	0.473576244
20160322_MKY0532_01	34.713	245.3305085	219.2613664	206.8999705	38.43053794	12.36139589	0.484079506
20160322_MKY0532_01	34.916	245.8135593	219.1747358	206.9111668	38.90239256	12.26356904	0.497654159
20160322_MKY0532_01	35.119	244.8135593	219.1409437	206.8400118	37.97354754	12.30093194	0.479387865
20160322_MKY0532_01	35.322	245.7627119	219.0561563	206.8644667	38.89824516	12.1916896	0.501593446
20160322_MKY0532_01	35.525	246.3983051	219.0818383	206.8926046	39.50570049	12.18923369	0.512422577
20160322_MKY0532_01	35.728	245.0974576	219.1317277	206.8301414	38.2673162	12.30158627	0.48447575
20160322_MKY0532_01	35.931	245.6398305	219.1770705	206.9549204	38.68491006	12.22215009	0.496142991
20160322_MKY0532_01	36.134	244.8516949	219.1332023	206.8510607	38.00063422	12.28214157	0.480874182
20160322_MKY0532_01	36.337	246.1652542	219.1751044	206.9614025	39.20385176	12.21370197	0.505727749
20160322_MKY0532_01	36.54	247.0127119	219.1255837	206.9434296	40.06928228	12.1821541	0.522751461
20160322_MKY0532_01	36.743	247.0254237	219.1330794	207.0135533	40.0118704	12.11952605	0.525381564
20160322_MKY0532_01	36.946	247.5677966	219.1587614	206.8901002	40.67769643	12.26866119	0.528414795
20160322_MKY0532_01	37.149	248.0550847	219.1513885	206.9889511	41.06613366	12.16243746	0.541478618
20160322_MKY0532_01	37.352	247.3940678	219.0999017	206.915439	40.47862879	12.18446269	0.529825091
20160322_MKY0532_01	37.555	246.9279661	219.1338167	206.9312021	39.99676398	12.20261454	0.520293389
20160322_MKY0532_01	37.758	247.2245763	218.9470386	206.8423689	40.38220738	12.1046697	0.5328143
20160322_MKY0532_01	37.961	246.8855932	218.9251659	206.9167649	39.96882834	12.00840101	0.531166812
20160322_MKY0532_01	38.164	246.0974576	218.9262718	206.9086623	39.18879528	12.01760947	0.516695024
20160322_MKY0532_01	38.367	244.8813559	218.9165643	206.8545963	38.02675959	12.06196792	0.493454676
20160322_MKY0532_01	38.57	245.6949153	219.0913001	206.7607543	38.93416098	12.3305458	0.494510376
20160322_MKY0532_01	38.773	245.2966102	218.9401573	206.8354449	38.46116527	12.10471238	0.498765323
20160322_MKY0532_01	38.976	244.8135593	218.9052593	206.844284	37.96927529	12.06097525	0.492487858
20160322_MKY0532_01	39.179	244.470339	218.8369378	206.8285209	37.64181806	12.0084169	0.489593763
20160322_MKY0532_01	39.382	244.6144068	218.8113787	206.7600177	37.8543891	12.05136104	0.490981513
20160322_MKY0532_01	39.585	245.2076271	218.8999754	206.7274602	38.48016689	12.1725152	0.495303349
20160322_MKY0532_01	39.788	245.25	218.9019415	206.8563642	38.39363583	12.04557734	0.500909006
20160322_MKY0532_01	39.991	245.3177966	218.9107889	206.9170595	38.40073709	11.99372937	0.503991985
20160322_MKY0532_01	40.194	245.6059322	218.9471615	206.8277843	38.77814788	12.11937714	0.503551573
20160322_MKY0532_01	40.397	246.0974576	218.8876874	206.891426	39.20603158	11.99626135	0.518248198
20160322_MKY0532_01	40.6	245.8432203	218.9238142	206.8513553	38.99186501	12.07245887	0.510017115
20160322_MKY0532_01	40.803	245.4576271	218.9847628	206.8691809	38.58844621	12.11558193	0.500407548
20160322_MKY0532_01	41.006	245.9661017	218.9077169	206.7461697	39.21993198	12.16154717	0.508964493
20160322_MKY0532_01	41.209	246.0762712	218.9136151	206.9039481	39.17232304	12.009667	0.516863433
20160322_MKY0532_01	41.412	246.2161017	218.9664537	206.9010018	39.31509993	12.06545191	0.516166815
20160322_MKY0532_01	41.615	246.2627119	219.0130253	206.8984973	39.36421452	12.11452797	0.514204725
20160322_MKY0532_01	41.818	246.1440678	218.8799459	206.7769593	39.36710846	12.10298659	0.514920758
20160322_MKY0532_01	42.021	246.279661	218.6920619	206.868739	39.41092207	11.82332298	0.532221172
20160322_MKY0532_01	42.224	246.7542373	218.9111575	206.8763995	39.87783776	12.034758	0.527981009
20160322_MKY0532_01	42.427	245.6186441	218.8618825	206.9195639	38.69908013	11.94231859	0.512308317
20160322_MKY0532_01	42.63	246.4915254	218.9164414	206.8196818	39.67184363	12.0967596	0.520684305
20160322_MKY0532_01	42.833	246.6737288	218.837798	206.9683265	39.70540236	11.86947153	0.534763346
20160322_MKY0532_01	43.036	246.6271186	218.832637	206.8928992	39.73421941	11.93973778	0.53105775
20160322_MKY0532_01	43.239	246.9745763	218.6932907	206.79066	40.18391628	11.90263075	0.541388729
20160322_MKY0532_01	43.442	246.6949153	218.7866798	206.8292575	39.86565774	11.95742226	0.532360034
20160322_MKY0532_01	43.645	246.7457627	218.7436717	206.8874484	39.85831427	11.85622323	0.538332091
20160322_MKY0532_01	43.848	245.9661017	218.7377734	206.7925751	39.17352656	11.94519828	0.520661583
20160322_MKY0532_01	44.051	246.3559322	218.6635537	206.9071892	39.44874305	11.75636454	0.536984185
20160322_MKY0532_01	44.254	246.3305085	218.7686164	206.7494107	39.58109775	12.01920564	0.523604322
20160322_MKY0532_01	44.457	246.4067797	218.6319735	206.91868	39.48809964	11.71329343	0.540352023
20160322_MKY0532_01	44.66	246.2754237	218.6066601	206.8992339	39.37618979	11.70742617	0.538663802
20160322_MKY0532_01	44.863	246.3389831	218.5928975	206.8080436	39.53093945	11.78485391	0.536740246
20160322_MKY0532_01	45.066	246.5466102	218.6555665	206.8226282	39.723982	11.83293831	0.537315854
20160322_MKY0532_01	45.269	245.1440678	218.5913001	206.7610489	38.38301889	11.83025116	0.51316231
20160322_MKY0532_01	45.472	245.8347458	218.6244778	206.8609311	38.97381471	11.7635467	0.527883453
20160322_MKY0532_01	45.675	245.9661017	218.6724011	206.8401591	39.12594259	11.83224198	0.526515169
20160322_MKY0532_01	45.878	246.0508475	218.6867781	206.8258692	39.22497828	11.8609089	0.526591897
20160322_MKY0532_01	46.081	246.0042373	218.587245	206.9130819	39.09115538	11.67416311	0.535481738
20160322_MKY0532_01	46.284	244.8813559	218.6148931	206.8383913	38.04296465	11.77650181	0.510144406
20160322_MKY0532_01	46.487	246.0974576	218.6477021	206.9273718	39.17008579	11.72033031	0.534096823
20160322_MKY0532_01	46.69	246.6864407	218.7018924	206.8236594	39.86278128	11.87823296	0.537076404
20160322_MKY0532_01	46.893	246.5254237	218.6260752	206.800383	39.7250407	11.82569217	0.537776355
20160322_MKY0532_01	47.096	246.1016949	218.5602114	206.8020035	39.29969138	11.75820782	0.53415186
20160322_MKY0532_01	47.299	246.4110169	218.5701647	206.8221862	39.58883074	11.74797845	0.540056198
20160322_MKY0532_01	47.502	245.6101695	218.5385844	206.9021803	38.70798917	11.6364041	0.530748631
20160322_MKY0532_01	47.705	245.2033898	218.4418776	206.8388332	38.3645566	11.60304438	0.526450584
20160322_MKY0532_01	47.908	245.7754237	218.5997788	206.8819976	38.89342609	11.71778117	0.529187673
20160322_MKY0532_01	48.111	246.9152542	218.5567707	206.9263406	39.98891364	11.6304301	0.554742657
20160322_MKY0532_01	48.314	246.3813559	218.5146228	206.9111668	39.47018917	11.60345599	0.546866929
20160322_MKY0532_01	48.517	246.1864407	218.6146473	206.8385386	39.34790208	11.77610873	0.533940175
20160322_MKY0532_01	48.72	245.7923729	218.5525928	206.8741897	38.91818313	11.67840303	0.532043456
20160322_MKY0532_01	48.923	246.3220339	218.6131728	206.8164408	39.50559312	11.79673199	0.535554727
20160322_MKY0532_01	49.126	244.940678	218.5199066	206.8370654	38.10361256	11.6828412	0.516813998
20160322_MKY0532_01	49.329	245.809322	218.5196609	206.8814084	38.92791367	11.63825248	0.534689214
20160322_MKY0532_01	49.532	246.3347458	218.5363726	206.8395698	39.49517593	11.69680274	0.541501452
20160322_MKY0532_01	49.735	246.0932203	218.4988941	206.8560695	39.23715081	11.64282454	0.540105434
20160322_MKY0532_01	49.938	246.309322	218.4750553	206.7916912	39.51763081	11.68336408	0.542746981
20160322_MKY0532_01	50.141	246.0084746	218.5464488	206.7883029	39.22017169	11.75814587	0.532704778
20160322_MKY0532_01	50.344	245.7584746	218.4272549	206.8095168	38.94895778	11.61773806	0.53634488
20160322_MKY0532_01	50.547	245.6779661	218.5588597	206.7103712	38.96759486	11.84848843	0.522675389
20160322_MKY0532_01	50.75	246.3220339	218.4175473	206.7382145	39.5838194	11.67933281	0.544213218
20160322_MKY0532_01	50.953	246.9872881	218.4246744	206.8451679	40.14212019	11.57950642	0.560824944
20160322_MKY0532_01	51.156	246.970339	218.4389285	206.7921332	40.17820581	11.64679531	0.557192915
20160322_MKY0532_01	51.359	247.4067797	218.3707299	206.763406	40.64337365	11.6073239	0.568306971
20160322_MKY0532_01	51.562	247.1101695	218.6005161	206.8351503	40.27501923	11.76536583	0.551499834
20160322_MKY0532_01	51.765	246.9322034	218.5043008	206.8000884	40.132115	11.70421242	0.552717548
20160322_MKY0532_01	51.968	246.6398305	218.4318014	206.8677077	39.77212279	11.56409371	0.55495217
20160322_MKY0532_01	52.171	247.2881356	218.5459572	206.8716853	40.41645027	11.67427191	0.559829149
20160322_MKY0532_01	52.374	247.6652542	218.5497665	206.7712139	40.89404033	11.77855262	0.561952302
20160322_MKY0532_01	52.577	247.0932203	218.5685672	206.7746022	40.3186181	11.79396498	0.5505121
20160322_MKY0532_01	52.78	246.6949153	218.5043008	206.7855038	39.90941142	11.71879698	0.547725133
20160322_MKY0532_01	52.983	246.8262712	218.4003441	206.7527991	40.07347213	11.64754501	0.55521624
20160322_MKY0532_01	53.186	246.6822034	218.3679037	206.7044785	39.9777249	11.66342517	0.552450175
20160322_MKY0532_01	53.389	246.9449153	218.5126567	206.7542722	40.19064301	11.75838443	0.550396426
20160322_MKY0532_01	53.592	247.3347458	218.4471615	206.7781379	40.55660787	11.66902357	0.56273994
20160322_MKY0532_01	53.795	246.0254237	218.3714672	206.8317619	39.1936618	11.53970526	0.545757558
20160322_MKY0532_01	53.998	247.0466102	218.4573605	206.7700354	40.27657481	11.68732517	0.556432107
20160322_MKY0532_01	54.201	247.25	218.349103	206.7868297	40.4631703	11.56227327	0.56789029
20160322_MKY0532_01	54.404	247.7118644	218.32551	206.6720684	41.03979605	11.6534416	0.572632031
20160322_MKY0532_01	54.607	247.6694915	218.3602851	206.780053	40.88943849	11.58023205	0.57462286
20160322_MKY0532_01	54.81	248.1737288	218.3516835	206.7522098	41.42151903	11.59947368	0.583207048
20160322_MKY0532_01	55.013	247.9364407	218.2294175	206.7731291	41.16331163	11.4562885	0.587946686
20160322_MKY0532_01	55.216	248.1144068	218.3198575	206.7669417	41.34746512	11.5529158	0.584919211
20160322_MKY0532_01	55.419	247.2627119	218.3044974	206.7128757	40.5498362	11.59162176	0.567593401
20160322_MKY0532_01	55.622	246.2457627	218.3272303	206.8892163	39.35654645	11.43801401	0.555290652
20160322_MKY0532_01	55.825	246.4152542	218.1907102	206.7697407	39.64551352	11.42096953	0.561820222
20160322_MKY0532_01	56.028	247.4237288	218.2188498	206.7354154	40.68831337	11.4834344	0.577250717
20160322_MKY0532_01	56.231	246.3559322	218.2202015	206.8257219	39.53021034	11.39447966	0.561380614
20160322_MKY0532_01	56.434	246.7372881	218.2801671	206.7774013	39.95988684	11.50276582	0.562387837
20160322_MKY0532_01	56.637	245.8305085	218.3322684	206.6941662	39.1363423	11.63810219	0.538540545
20160322_MKY0532_01	56.84	245.0889831	218.3159253	206.6897466	38.39923644	11.62617868	0.525679055
20160322_MKY0532_01	57.043	245.3559322	218.3060949	206.7472009	38.60873126	11.55889392	0.533691775
20160322_MKY0532_01	57.246	244.9067797	218.2182354	206.7834414	38.12333829	11.43479407	0.532362022
20160322_MKY0532_01	57.449	245.9491525	218.3293192	206.7439599	39.20519261	11.58535931	0.543099767
20160322_MKY0532_01	57.652	246.2118644	218.4459327	206.8145256	39.39733877	11.63140703	0.543769644
20160322_MKY0532_01	57.855	245.1949153	218.3483657	206.7200943	38.47482097	11.62827141	0.526946
20160322_MKY0532_01	58.058	246.7288136	218.4104203	206.8242487	39.90456489	11.58617158	0.555998518
20160322_MKY0532_01	58.261	247.6822034	218.3648317	206.7055097	40.97669367	11.65932193	0.571089913
20160322_MKY0532_01	58.464	246.3305085	218.3647088	206.8198291	39.51067936	11.54487966	0.551321908
20160322_MKY0532_01	58.667	246.0127119	218.271074	206.7852092	39.22750267	11.48586478	0.549805143
20160322_MKY0532_01	58.87	245.279661	218.2640698	206.8078963	38.47176473	11.45617351	0.537551952
20160322_MKY0532_01	59.073	246.1737288	218.2527648	206.8246906	39.34903818	11.42807418	0.555791745
20160322_MKY0532_01	59.276	244.9788136	218.24232	206.8018562	38.17695734	11.44046376	0.533013022
20160322_MKY0532_01	59.479	245.2457627	218.2403539	206.8076017	38.43816106	11.43275224	0.538397275
20160322_MKY0532_01	59.682	245.4491525	218.2129516	206.7424867	38.7066658	11.47046484	0.541047676
20160322_MKY0532_01	59.885	245.4830508	218.236176	206.7228933	38.76015751	11.51328262	0.539352131
20160322_MKY0532_01	60.088	245.9788136	218.2086508	206.8022982	39.17651539	11.4063526	0.553953615
20160322_MKY0532_01	60.291	246.2033898	218.2010322	206.6845905	39.51879938	11.51644174	0.553286154
20160322_MKY0532_01	60.494	245.7881356	218.1588842	206.804508	38.98362764	11.35437629	0.55368213
20160322_MKY0532_01	60.697	244.8898305	218.0158516	206.6981438	38.19168672	11.31770778	0.541057042
20160322_MKY0532_01	60.9	246.4194915	218.1860408	206.6826753	39.73681622	11.50336549	0.558188856
20160322_MKY0532_01	61.103	246.0423729	218.0518555	206.7181791	39.32419374	11.33367635	0.561473833
20160322_MKY0532_01	61.306	245.6440678	218.0454657	206.6960813	38.94798648	11.3493844	0.553332394
20160322_MKY0532_01	61.509	245.1101695	218.0926518	206.6851797	38.42498976	11.40747203	0.539748
20160322_MKY0532_01	61.712	245.1016949	217.9684198	206.641426	38.46026887	11.32699371	0.54555044
20160322_MKY0532_01	61.915	244.0720339	217.9310641	206.7390984	37.33293549	11.19196573	0.532729694
20160322_MKY0532_01	62.118	244.6779661	217.9680511	206.8095168	37.86844931	11.15853432	0.545169315
20160322_MKY0532_01	62.321	244.1822034	217.9737036	206.7899234	37.39228	11.18378022	0.534391819
20160322_MKY0532_01	62.524	243.6101695	218.0942492	206.6975545	36.91261498	11.39669469	0.511962502
20160322_MKY0532_01	62.727	243.3855932	218.0560334	206.8053919	36.58020135	11.25064156	0.514644194
20160322_MKY0532_01	62.93	243.9025424	218.0158516	206.7586918	37.14385056	11.25715975	0.524981924
20160322_MKY0532_01	63.133	244.3177966	218.0634062	206.7648792	37.55291741	11.29852704	0.530157389
20160322_MKY0532_01	63.336	245.2838983	217.9397886	206.760165	38.52373331	11.17962365	0.556370453
20160322_MKY0532_01	63.539	245.8516949	217.9843942	206.7545669	39.09712803	11.22982732	0.564019526
20160322_MKY0532_01	63.742	245.5	217.9626444	206.7819682	38.71803182	11.1806762	0.560028988
20160322_MKY0532_01	63.945	246.220339	218.0416564	206.8338244	39.38651459	11.20783203	0.571024497
20160322_MKY0532_01	64.148	245.3008475	218.0146228	206.7511786	38.54966891	11.26344421	0.55136308
20160322_MKY0532_01	64.351	244.279661	217.8679037	206.6828226	37.59683839	11.18508103	0.538231846
20160322_MKY0532_01	64.554	245.0466102	217.7769722	206.6946081	38.35200204	11.0823641	0.559533802
20160322_MKY0532_01	64.757	244.8220339	217.9480216	206.6953447	38.12668917	11.2526769	0.544001602
20160322_MKY0532_01	64.96	244.0762712	217.7997051	206.689452	37.38681921	11.11025311	0.539033234
20160322_MKY0532_01	65.163	244.9661017	217.8277218	206.7953742	38.17072751	11.03234761	0.559374624
20160322_MKY0532_01	65.366	245.2754237	217.8486115	206.6651444	38.61027936	11.18346708	0.557776594
20160322_MKY0532_01	65.569	245.059322	217.8760138	206.7358574	38.32346464	11.14015637	0.555132801
20160322_MKY0532_01	65.772	244.7415254	217.7417056	206.770772	37.97075347	10.97093363	0.559619283
20160322_MKY0532_01	65.975	244.8813559	217.6187024	206.7840306	38.09732529	10.83467174	0.571463451
20160322_MKY0532_01	66.178	244.7754237	217.6518801	206.6032705	38.17215325	11.04860959	0.558309817
20160322_MKY0532_01	66.381	245.3516949	217.6736299	206.5931055	38.75858944	11.0805244	0.567529027
20160322_MKY0532_01	66.584	244.9491525	217.6795281	206.6753094	38.27384317	11.00421877	0.563282234
20160322_MKY0532_01	66.787	244.3771186	217.7161465	206.7909546	37.58616402	10.92519185	0.555176059
20160322_MKY0532_01	66.99	244.4364407	217.6658884	206.6352387	37.80120202	11.03064977	0.552302118
20160322_MKY0532_01	67.193	245.8220339	217.710494	206.7007955	39.12123838	11.00969846	0.579422872
20160322_MKY0532_01	67.396	245.3644068	217.6254608	206.7083088	38.656098	10.91715202	0.576744644
20160322_MKY0532_01	67.599	245.1355932	217.5478004	206.7470536	38.3885396	10.80074682	0.579617091
20160322_MKY0532_01	67.802	244.0508475	217.7263455	206.7177372	37.33311027	11.00860836	0.544652138
20160322_MKY0532_01	68.005	244.2542373	217.5819612	206.7377725	37.51646475	10.84418863	0.559310268
20160322_MKY0532_01	68.208	243.9745763	217.5856476	206.756482	37.21809424	10.82916555	0.554429036
20160322_MKY0532_01	68.411	244.9279661	217.6035881	206.7010902	38.22687594	10.90249795	0.569319764
20160322_MKY0532_01	68.614	244.690678	217.6174736	206.8015616	37.88911639	10.815912	0.568642057
20160322_MKY0532_01	68.817	244.4872881	217.5364955	206.7712139	37.71607423	10.76528155	0.568728164
20160322_MKY0532_01	69.02	244.6059322	217.5825756	206.7414555	37.86447669	10.84112006	0.566407017
20160322_MKY0532_01	69.223	244.7457627	217.6024822	206.7208309	38.02493183	10.8816513	0.566779487
20160322_MKY0532_01	69.426	244.4110169	217.5627918	206.763406	37.64761094	10.79938583	0.564994574
20160322_MKY0532_01	69.629	245.3177966	217.5390759	206.6225692	38.69522737	10.9165067	0.577558517
20160322_MKY0532_01	69.832	244.3432203	217.4648562	206.6512964	37.69192393	10.81355982	0.564893419
20160322_MKY0532_01	70.035	245.1483051	217.6112067	206.6256629	38.52264215	10.98554375	0.569409339
20160322_MKY0532_01	70.238	244.9322034	217.5611944	206.6882734	38.24392997	10.87292097	0.571702413
20160322_MKY0532_01	70.441	244.8898305	217.5496436	206.702858	38.18697252	10.84678566	0.572394054
20160322_MKY0532_01	70.644	245.2881356	217.4343819	206.7087507	38.57938486	10.72563117	0.588774361
20160322_MKY0532_01	70.847	244.5127119	217.4173015	206.6433412	37.86937067	10.77396036	0.571175152
20160322_MKY0532_01	71.05	243.5423729	217.4850086	206.7522098	36.7901631	10.73279882	0.55249548
20160322_MKY0532_01	71.253	244.2118644	217.4268862	206.6957867	37.51607773	10.73109953	0.567124045
20160322_MKY0532_01	71.456	244.0889831	217.4771443	206.6676488	37.42133426	10.80949547	0.559804321
20160322_MKY0532_01	71.659	244.7076271	217.4420005	206.6789923	38.02863478	10.76300815	0.575116948
20160322_MKY0532_01	71.862	245.0084746	217.3950602	206.6462876	38.36218701	10.74877264	0.582778069
20160322_MKY0532_01	72.065	243.5211864	217.3821578	206.5886859	36.93250052	10.79347186	0.551190838
20160322_MKY0532_01	72.268	243.7033898	217.1982059	206.662198	37.04119184	10.53600795	0.571342109
20160322_MKY0532_01	72.471	244.3601695	217.381912	206.618297	37.7418725	10.76361502	0.569358723
20160322_MKY0532_01	72.674	245.5635593	217.5447284	206.686211	38.87734836	10.85851747	0.585217729
20160322_MKY0532_01	72.877	243.7415254	217.4802163	206.6677961	37.07372931	10.81242016	0.552706553
20160322_MKY0532_01	73.08	243.9279661	217.4358565	206.6773718	37.25059427	10.75848464	0.559921055
20160322_MKY0532_01	73.283	243.8389831	217.3715901	206.6869476	37.1520355	10.68464252	0.563075677
20160322_MKY0532_01	73.486	243.3898305	217.3370607	206.7824101	36.60742037	10.55465057	0.561193223
20160322_MKY0532_01	73.689	243.0932203	217.4767756	206.6844431	36.4087772	10.79233249	0.540857728
20160322_MKY0532_01	73.892	243.8474576	217.3245269	206.631261	37.21619658	10.69326586	0.563761333
20160322_MKY0532_01	74.095	244.3516949	217.3543868	206.6586623	37.69303257	10.69572448	0.573153896
20160322_MKY0532_01	74.298	245.0677966	217.415827	206.6263995	38.44139708	10.78942746	0.581468025
20160322_MKY0532_01	74.501	244.2372881	217.4490047	206.6166765	37.62061165	10.83232818	0.562185495
20160322_MKY0532_01	74.704	243.9915254	217.3957975	206.7131703	37.27835512	10.68262719	0.565753181
20160322_MKY0532_01	74.907	243.6652542	217.4601868	206.7114025	36.95385176	10.7487843	0.554668836
20160322_MKY0532_01	75.11	243.9322034	217.4303269	206.6979965	37.23420693	10.7323304	0.561403657
20160322_MKY0532_01	75.313	244.2584746	217.4905382	206.6947555	37.56371913	10.79578277	0.563577101
20160322_MKY0532_01	75.516	245.4194915	217.3785942	206.7947849	38.62470661	10.58380933	0.600033079
20160322_MKY0532_01	75.719	245.4830508	217.3043745	206.8151149	38.66793594	10.48925963	0.607974351
20160322_MKY0532_01	75.922	245.8940678	217.2342099	206.7217148	39.17235301	10.51249509	0.616520098
20160322_MKY0532_01	76.125	246.4067797	217.2988449	206.655274	39.75150565	10.64357091	0.618348827
20160322_MKY0532_01	76.328	246.2161017	217.2963873	206.7317325	39.48436923	10.56465485	0.618909256
20160322_MKY0532_01	76.531	244.5127119	217.3076923	206.736594	37.77611788	10.57109832	0.583753149
20160322_MKY0532_01	76.734	244.6144068	217.3420988	206.7071302	37.90727655	10.63496857	0.581794762
20160322_MKY0532_01	76.937	245.1694915	217.2888916	206.6704478	38.49904368	10.61844377	0.594940595
20160322_MKY0532_01	77.14	245.529661	217.2784468	206.6255156	38.9041454	10.65293118	0.600580526
20160322_MKY0532_01	77.343	246.1144068	217.3392725	206.6767826	39.43762422	10.66248999	0.610611827
20160322_MKY0532_01	77.546	245.5550847	217.3567216	206.8205657	38.73451904	10.53615585	0.605810005
20160322_MKY0532_01	77.749	246.0423729	217.3310396	206.6169711	39.42540175	10.71406844	0.606547163
20160322_MKY0532_01	77.952	245.9661017	217.3645859	206.6411314	39.32497029	10.72345448	0.603846987
20160322_MKY0532_01	78.155	246.5508475	217.263824	206.5469947	40.00385276	10.71682934	0.617923287
20160322_MKY0532_01	78.358	246.1144068	217.3178914	206.7520625	39.36234432	10.56582891	0.616342544
20160322_MKY0532_02	-3.248	290.02	228.5969276	208.6764253	81.34357473	19.92050231	1.004283438
20160322_MKY0532_02	-3.045	287.2433333	227.8639356	208.5819209	78.66141243	19.28201472	1.003131899
20160322_MKY0532_02	-2.842	286.26	227.5724214	208.3559322	77.9040678	19.21648916	0.995577922
20160322_MKY0532_02	-2.639	286.3766667	227.5830285	208.470981	77.90568567	19.11204753	1.002165631
20160322_MKY0532_02	-2.436	285.35	227.2955377	208.3764766	76.97352337	18.91906104	0.99988746
20160322_MKY0532_02	-2.233	285.9666667	227.321507	208.4535182	77.51314843	18.86798872	1.011621907
20160322_MKY0532_02	-2.03	285.17	227.1843453	208.3204931	76.84950693	18.86385222	1.001467299
20160322_MKY0532_02	-1.827	284.2666667	226.8536942	208.2639959	76.00267078	18.58969833	1.005770402
20160322_MKY0532_02	-1.624	284.27	226.8127286	208.1597329	76.11026708	18.65299568	1.003369351
20160322_MKY0532_02	-1.421	283.34	226.6261887	208.2408834	75.09911659	18.38530532	1.004676258
20160322_MKY0532_02	-1.218	282.7066667	226.6324067	208.1874679	74.51919877	18.44493883	0.991450682
20160322_MKY0532_02	-1.015	282.9433333	226.5409656	208.0251669	74.91816641	18.5157987	0.993253529
20160322_MKY0532_02	-0.812	283.34	226.650695	208.1284027	75.21159733	18.52229228	0.997526176
20160322_MKY0532_02	-0.609	283.2966667	226.7651792	208.0426297	75.25403698	18.72254954	0.985331791
20160322_MKY0532_02	0	212.8066667	215.051207	207.7360041	5.070662558	7.315202914	0
20160322_MKY0532_02	0.203	213.04	214.9711046	207.5367232	5.503276836	7.434381445	0.013946114
20160322_MKY0532_02	0.406	213.25	215.1411851	207.8269132	5.4230868	7.314271877	0.014299301
20160322_MKY0532_02	0.609	213.5733333	215.1839795	207.6738572	5.899476117	7.510122301	0.027362222
20160322_MKY0532_02	0.812	213.71	215.1905633	207.7508988	5.959101181	7.439664458	0.031940112
20160322_MKY0532_02	1.015	214.0966667	215.1752012	207.8151002	6.281566513	7.360101016	0.047483595
20160322_MKY0532_02	1.218	214.19	215.1773958	207.8638932	6.326106831	7.313502588	0.050898518
20160322_MKY0532_02	1.421	213.9233333	215.0592538	207.5952748	6.328058551	7.463979059	0.045810209
20160322_MKY0532_02	1.624	214.1033333	215.0204828	207.7149461	6.388387262	7.305536738	0.053703282
20160322_MKY0532_02	1.827	214.2666667	215.1514265	207.596302	6.670364664	7.555124478	0.056201799
20160322_MKY0532_02	2.03	214.3233333	215.253109	207.7544941	6.56883924	7.498614905	0.054162052
20160322_MKY0532_02	2.233	214.4733333	215.1854426	207.6666667	6.806666666	7.518775908	0.062836247
20160322_MKY0532_02	2.436	214.63	215.0888808	207.7211094	6.908890601	7.367771362	0.072442503
20160322_MKY0532_02	2.639	214.8766667	215.0343819	207.440678	7.435988701	7.593703892	0.08473979
20160322_MKY0532_02	2.842	214.6566667	214.9978054	207.3965074	7.26015922	7.601297966	0.077597799
20160322_MKY0532_02	3.045	215.0366667	214.9919532	207.4119158	7.624750899	7.580037414	0.092639605
20160322_MKY0532_02	3.248	214.75	215.0771763	207.5572676	7.192732409	7.519908707	0.078003926
20160322_MKY0532_02	3.451	214.91	214.8269934	207.577812	7.332187982	7.249181398	0.094284151
20160322_MKY0532_02	3.654	214.6533333	214.931602	207.5588084	7.09452491	7.372793625	0.079711789
20160322_MKY0532_02	3.857	215.0366667	214.9978054	207.4673857	7.569280945	7.530419691	0.092420906
20160322_MKY0532_02	4.06	214.8366667	214.973665	207.6178737	7.218793015	7.355791308	0.085375097
20160322_MKY0532_02	4.263	215.01	214.8800293	207.5377504	7.472249615	7.342278876	0.096135933
20160322_MKY0532_02	4.466	214.9	214.950256	207.3528505	7.547149461	7.597405496	0.088932688
20160322_MKY0532_02	4.669	215.9	214.9462326	207.5095018	8.390498202	7.436730828	0.128883663
20160322_MKY0532_02	4.872	215.73	214.899049	207.5947612	8.135238829	7.304287841	0.124591677
20160322_MKY0532_02	5.075	215.6966667	214.7666423	207.4910118	8.205654854	7.275630469	0.128758191
20160322_MKY0532_02	5.278	215.8433333	214.9213606	207.4678993	8.375434001	7.453461312	0.127534749
20160322_MKY0532_02	5.481	215.9666667	214.8983175	207.5141243	8.452542373	7.38419319	0.133750584
20160322_MKY0532_02	5.684	216.2933333	214.9341624	207.5413457	8.751987673	7.392816739	0.145353719
20160322_MKY0532_02	5.887	216.2066667	214.9103877	207.4622496	8.744417052	7.448138095	0.142447862
20160322_MKY0532_02	6.09	216.28	214.8760059	207.4571135	8.822886492	7.418892344	0.146952038
20160322_MKY0532_02	6.293	216.6433333	214.9195318	207.4232152	9.22011813	7.496316619	0.159010679
20160322_MKY0532_02	6.496	216.47	214.7754206	207.4134566	9.0565434	7.361964029	0.159077983
20160322_MKY0532_02	6.699	216.95	214.8013899	207.4555727	9.494427324	7.345817229	0.177537118
20160322_MKY0532_02	6.902	216.6833333	214.753109	207.3923986	9.290934771	7.360710436	0.168572994
20160322_MKY0532_02	7.105	217.17	214.7165326	207.3872625	9.782737545	7.329270098	0.190054177
20160322_MKY0532_02	7.308	217.3033333	214.8646672	207.3328197	9.97051361	7.531847431	0.186804972
20160322_MKY0532_02	7.511	217.2566667	214.6858083	207.4201335	9.836533128	7.2656748	0.19570825
20160322_MKY0532_02	7.714	217.0866667	214.6060717	207.29019	9.796476631	7.315881654	0.19133407
20160322_MKY0532_02	7.917	217.2933333	214.6803219	207.4637904	9.829542886	7.216531426	0.198152352
20160322_MKY0532_02	8.12	217.2966667	214.6737381	207.3980483	9.898618388	7.275689834	0.197683995
20160322_MKY0532_02	8.323	217.2366667	214.5288954	207.3662044	9.87046225	7.162690974	0.202877589
20160322_MKY0532_02	8.526	217.2533333	214.6755669	207.2526965	10.00063688	7.422870479	0.193764222
20160322_MKY0532_02	8.729	217.27	214.652158	207.3697997	9.900200308	7.282358318	0.197379297
20160322_MKY0532_02	8.932	217.86	214.6360644	207.4134566	10.4465434	7.222607775	0.223118525
20160322_MKY0532_02	9.135	216.99	214.4195318	207.3492553	9.640744735	7.070276557	0.198588661
20160322_MKY0532_02	9.338	217.7533333	214.6415508	207.3949666	10.35836672	7.246584226	0.218096411
20160322_MKY0532_02	9.541	217.57	214.4740307	207.3898305	10.18016949	7.084200216	0.220350951
20160322_MKY0532_02	9.744	217.7966667	214.6539868	207.3004623	10.49620442	7.353524582	0.217491175
20160322_MKY0532_02	9.947	217.7	214.46891	207.461736	10.238264	7.007174018	0.227486239
20160322_MKY0532_02	10.15	218.05	214.5010973	207.3985619	10.65143811	7.102535403	0.238907389
20160322_MKY0532_02	10.353	218.03	214.4952451	207.3410375	10.68896251	7.154207568	0.237252527
20160322_MKY0532_02	10.556	217.66	214.2948061	207.3009759	10.35902414	6.993830285	0.233426897
20160322_MKY0532_02	10.759	217.8433333	214.2838332	207.2578326	10.58550077	7.026000648	0.240966534
20160322_MKY0532_02	10.962	218.0566667	214.4056328	207.3775039	10.67916282	7.02812892	0.244779132
20160322_MKY0532_02	11.165	218.1133333	214.5047549	207.3091936	10.8041397	7.195561307	0.239450549
20160322_MKY0532_02	11.368	217.9133333	214.4407462	207.2937853	10.61954802	7.146960848	0.234824197
20160322_MKY0532_02	11.571	218.0066667	214.4067301	207.4124294	10.59423729	6.994300687	0.243359304
20160322_MKY0532_02	11.774	218.2266667	214.3920995	207.4268105	10.79985619	6.96528901	0.25397299
20160322_MKY0532_02	11.977	218.31	214.5128018	207.5213148	10.78868516	6.991486913	0.251778594
20160322_MKY0532_02	12.18	218.3733333	214.3730797	207.4365691	10.93676425	6.936510656	0.261725316
20160322_MKY0532_02	12.383	218.7566667	214.3536942	207.4509502	11.30571649	6.902744041	0.27984346
20160322_MKY0532_02	12.586	218.4466667	214.1953182	207.3477144	11.09895223	6.847603783	0.274805728
20160322_MKY0532_02	12.789	218.7	214.2256767	207.3775039	11.32249615	6.848172812	0.284435548
20160322_MKY0532_02	12.992	218.85	214.4041697	207.4211608	11.42883924	6.983008955	0.279489676
20160322_MKY0532_02	13.195	218.72	214.3313826	207.3389831	11.38101695	6.992399539	0.276812616
20160322_MKY0532_02	13.398	219.1	214.411485	207.2768362	11.82316384	7.134648846	0.285557392
20160322_MKY0532_02	13.601	219.2266667	214.4220922	207.4103749	11.81629173	7.011717237	0.293873548
20160322_MKY0532_02	13.804	219.69	214.4330651	207.3615819	12.32841808	7.071483185	0.311107597
20160322_MKY0532_02	14.007	219.7666667	214.5003658	207.3600411	12.40662558	7.140324675	0.309373014
20160322_MKY0532_02	14.21	219.9066667	214.2571324	207.3014895	12.6051772	6.955642936	0.331495157
20160322_MKY0532_02	14.413	219.69	214.2432334	207.085773	12.60422702	7.157460374	0.31631893
20160322_MKY0532_02	14.616	219.9733333	214.2373811	207.2352337	12.73809964	7.002147434	0.333553135
20160322_MKY0532_02	14.819	219.19	214.1598391	207.3158706	11.87412943	6.843968494	0.308612775
20160322_MKY0532_02	15.022	220.0266667	214.4429407	207.3143297	12.71233693	7.128611008	0.322922537
20160322_MKY0532_02	15.225	219.9866667	214.2483541	207.3836672	12.60299949	6.86468688	0.338514108
20160322_MKY0532_02	15.428	220.0166667	214.2304316	207.3477144	12.66895224	6.88271717	0.339927977
20160322_MKY0532_02	15.631	220.17	214.3002926	207.296867	12.87313302	7.003425637	0.339166361
20160322_MKY0532_02	15.834	219.9566667	214.341624	207.2290704	12.7275963	7.112553629	0.324750668
20160322_MKY0532_02	16.037	219.7566667	214.1784931	207.1212121	12.63545455	7.057280929	0.325034681
20160322_MKY0532_02	16.24	220.4266667	214.2790783	207.3497689	13.07689779	6.929309399	0.353701314
20160322_MKY0532_02	16.443	220.0566667	214.1327725	207.1576785	12.89898819	6.975094015	0.342476085
20160322_MKY0532_02	16.646	220.4033333	214.2326262	207.222907	13.1804263	7.009719153	0.351663571
20160322_MKY0532_02	16.849	220.38	214.2827359	207.1222393	13.25776066	7.160496575	0.343134233
20160322_MKY0532_02	17.052	221.3	214.2607901	207.2717001	14.02829995	6.98909	0.389244148
20160322_MKY0532_02	17.255	221.0866667	214.29188	207.2013354	13.88533128	7.090544641	0.374763719
20160322_MKY0532_02	17.458	221.07	214.2260424	207.0652286	14.00477144	7.160813872	0.374012178
20160322_MKY0532_02	17.661	221.04	214.138259	207.2516692	13.78833076	6.886589726	0.387771586
20160322_MKY0532_02	17.864	220.7366667	214.2297001	207.1658963	13.57077042	7.063803822	0.363768326
20160322_MKY0532_02	18.067	220.6833333	214.2673738	207.2403698	13.44296353	7.027004011	0.361360896
20160322_MKY0532_02	18.27	220.97	214.2410388	207.2444787	13.72552132	6.996560086	0.375789971
20160322_MKY0532_02	18.473	221.11	214.2026335	207.201849	13.908151	7.000784506	0.383167007
20160322_MKY0532_02	18.676	220.79	214.1031456	207.095018	13.69498202	7.008127598	0.373539904
20160322_MKY0532_02	18.879	220.9566667	214.1013168	207.0174628	13.9392039	7.083853989	0.377564426
20160322_MKY0532_02	19.082	220.67	214.1046086	207.1366204	13.53337956	6.96798819	0.370004392
20160322_MKY0532_02	19.285	220.8466667	214.1338698	207.0215716	13.82509502	7.112298139	0.370480598
20160322_MKY0532_02	19.488	220.4666667	213.9729334	207.0385208	13.42814587	6.93441263	0.368294691
20160322_MKY0532_02	19.691	220.6533333	214.1174104	207.146379	13.50695429	6.971031343	0.368630313
20160322_MKY0532_02	19.894	220.68	214.0753475	207.2172573	13.46274268	6.858090157	0.37617289
20160322_MKY0532_02	20.097	220.65	213.9231895	207.0405752	13.60942476	6.882614222	0.380414061
20160322_MKY0532_02	20.3	220.7733333	213.9864667	207.1905496	13.58278377	6.795917152	0.386725345
20160322_MKY0532_02	20.503	220.95	214.006218	207.1386749	13.81132512	6.867543112	0.390408372
20160322_MKY0532_02	20.706	220.5233333	213.8858815	206.9794556	13.54387776	6.906425919	0.375583122
20160322_MKY0532_02	20.909	220.9033333	213.8939283	207.0333847	13.86994864	6.860543616	0.393547455
20160322_MKY0532_02	21.112	220.8666667	213.9414777	207.2871084	13.57955829	6.654369316	0.399175729
20160322_MKY0532_02	21.315	221.2133333	214.0724214	207.3893169	13.82401644	6.683104463	0.407412102
20160322_MKY0532_02	21.518	221.73	214.1287491	207.0955316	14.63446841	7.033217499	0.41104449
20160322_MKY0532_02	21.721	221.3366667	214.1302121	207.1361068	14.20055984	6.994105312	0.396113667
20160322_MKY0532_02	21.924	221.73	214.1481346	207.1448382	14.58516179	7.003296388	0.411592345
20160322_MKY0532_02	22.127	221.28	214.0025604	206.9681561	14.31184386	7.034404213	0.397354379
20160322_MKY0532_02	22.33	221.0933333	213.936357	207.1058038	13.98752953	6.830553185	0.40127618
20160322_MKY0532_02	22.533	221.6566667	214.0234089	207.0457114	14.61095532	6.977697574	0.41495067
20160322_MKY0532_02	22.736	221.5533333	214.0782736	207.3312789	14.22205444	6.746994701	0.419085636
20160322_MKY0532_02	22.939	221.7533333	214.0603511	207.229584	14.52374936	6.830767159	0.424511248
20160322_MKY0532_02	23.142	221.6866667	213.8412582	207.1191577	14.56750899	6.722100552	0.436621467
20160322_MKY0532_02	23.345	221.8566667	213.8745428	207.1664099	14.69025681	6.708132933	0.443378624
20160322_MKY0532_02	23.548	221.78	213.8021214	207.1931176	14.58688238	6.609003817	0.448475321
20160322_MKY0532_02	23.751	222.27	213.9202634	207.1248074	15.1451926	6.795455954	0.454874084
20160322_MKY0532_02	23.954	221.4266667	213.8895391	207.0241397	14.40252696	6.865399435	0.416103514
20160322_MKY0532_02	24.157	221.8466667	213.8986832	207.1063174	14.74034926	6.792365837	0.437518472
20160322_MKY0532_02	24.36	221.9266667	213.7915143	207.030303	14.89636364	6.761211235	0.44731607
20160322_MKY0532_02	24.563	222.0333333	213.880395	207.1566513	14.87668207	6.723743768	0.450085803
20160322_MKY0532_02	24.766	222.4766667	214.0921726	207.2167437	15.25992296	6.875428933	0.452137873
20160322_MKY0532_02	24.969	222.2466667	213.9198976	207.2172573	15.02940935	6.702640267	0.458899303
20160322_MKY0532_02	25.172	222.2833333	213.9809802	207.1915768	15.09175655	6.789403464	0.453131173
20160322_MKY0532_02	25.375	222.5366667	214.0508413	207.2429379	15.29372881	6.807903405	0.460130123
20160322_MKY0532_02	25.578	222.19	213.8708852	207.0986133	15.09138675	6.772271899	0.454780696
20160322_MKY0532_02	25.781	222.8233333	213.8295538	206.9866461	15.83668721	6.842907645	0.480230522
20160322_MKY0532_02	25.984	222.8866667	213.9795172	207.1284027	15.758264	6.85111452	0.476018436
20160322_MKY0532_02	26.187	222.2966667	213.9509876	207.2814587	15.01520801	6.66952891	0.461566191
20160322_MKY0532_02	26.39	222.8466667	213.8496708	207.2362609	15.61040575	6.613409898	0.493885356
20160322_MKY0532_02	26.593	222.84	213.9842721	207.0056497	15.83435028	6.978622411	0.466798976
20160322_MKY0532_02	26.796	222.5666667	214.032553	207.1314843	15.43518233	6.901068701	0.457218131
20160322_MKY0532_02	26.999	222.6133333	213.9308705	206.9748331	15.63850026	6.956037442	0.460640864
20160322_MKY0532_02	27.202	223.0666667	213.9857352	207.1268618	15.93980483	6.858873348	0.483088243
20160322_MKY0532_02	27.405	222.89	214.0164594	207.0020544	15.88794556	7.014404957	0.46563362
20160322_MKY0532_02	27.608	222.91	213.8763716	207.0513611	15.85863893	6.825010549	0.482981044
20160322_MKY0532_02	27.811	222.2833333	213.8979517	207.0996405	15.18369286	6.798311246	0.456274395
20160322_MKY0532_02	28.014	222.9666667	214.0475494	207.1032357	15.86343092	6.944313631	0.471360204
20160322_MKY0532_02	28.217	222.71	213.8968544	207.1248074	15.5851926	6.77204703	0.476403019
20160322_MKY0532_02	28.42	223.1166667	213.8979517	207.1890087	15.92765794	6.708942988	0.497936687
20160322_MKY0532_02	28.623	223.0566667	214.0321873	207.1540832	15.90258346	6.878104066	0.479560398
20160322_MKY0532_02	28.826	222.5333333	213.732992	207.1006677	15.43266564	6.632324259	0.483952662
20160322_MKY0532_02	29.029	222.8333333	213.8723482	206.9491525	15.88418079	6.923195666	0.474312182
20160322_MKY0532_02	29.232	222.6533333	213.821507	207.0123267	15.64100668	6.809180294	0.475113362
20160322_MKY0532_02	29.435	222.6533333	213.8226042	207.0297894	15.62354391	6.792814823	0.475991189
20160322_MKY0532_02	29.638	222.2366667	213.639722	206.9748331	15.26183359	6.664888942	0.472991996
20160322_MKY0532_02	29.841	222.1633333	213.8566203	206.9661017	15.19723164	6.890518642	0.448002919
20160322_MKY0532_02	30.044	222.28	213.8295538	207.0749872	15.20501284	6.754566607	0.461494189
20160322_MKY0532_02	30.247	222.4933333	213.9041697	207.1140216	15.37931176	6.790148143	0.465603869
20160322_MKY0532_02	30.45	223.01	213.7366496	207.0559836	15.95401644	6.680666034	0.502082158
20160322_MKY0532_02	30.653	222.4133333	213.6821507	207.1402157	15.27311762	6.541934979	0.486251939
20160322_MKY0532_02	30.856	222.8533333	213.872714	207.113508	15.73982537	6.759206011	0.484475079
20160322_MKY0532_02	31.059	222.4633333	213.7937089	207.0698511	15.39348228	6.723857798	0.472842943
20160322_MKY0532_02	31.262	222.9866667	213.7362838	207.0924499	15.89421674	6.64383391	0.503337664
20160322_MKY0532_02	31.465	222.6133333	213.5910753	207.0174628	15.59587057	6.573612584	0.497463509
20160322_MKY0532_02	31.668	223.0066667	213.7359181	206.9835645	16.02310221	6.752353611	0.497602544
20160322_MKY0532_02	31.871	222.68	213.7318947	206.9784284	15.70157165	6.753466309	0.483383417
20160322_MKY0532_02	32.074	222.55	213.6752012	207.0960452	15.4539548	6.579155972	0.49048157
20160322_MKY0532_02	32.277	223.15	213.5896123	207.0508475	16.09915254	6.538764832	0.524009348
20160322_MKY0532_02	32.48	222.78	213.6916606	206.9974319	15.78256805	6.694228624	0.493062125
20160322_MKY0532_02	32.683	223.01	213.8127286	206.9619928	16.04800719	6.850735794	0.488584676
20160322_MKY0532_02	32.886	222.64	213.5950988	206.9219312	15.71806882	6.67316758	0.492403146
20160322_MKY0532_02	33.089	222.9233333	213.6945867	207.0112994	15.9120339	6.683287251	0.499943887
20160322_MKY0532_02	33.292	223.13	213.7161668	207.0087314	16.12126862	6.707435407	0.506645392
20160322_MKY0532_02	33.495	222.8333333	213.5464521	207.0215716	15.81176168	6.524880436	0.512513872
20160322_MKY0532_02	33.698	223.4033333	213.549744	207.0225989	16.38073446	6.527145095	0.538087041
20160322_MKY0532_02	33.901	223.12	213.6057059	206.9809964	16.13900359	6.62470952	0.516329263
20160322_MKY0532_02	34.104	222.9266667	213.5669349	207.0518747	15.87479199	6.515060215	0.516461764
20160322_MKY0532_02	34.307	223.0333333	213.7326262	206.9861325	16.04720082	6.746493677	0.49927124
20160322_MKY0532_02	34.51	222.4633333	213.5384053	207.021058	15.4422753	6.517347229	0.49654965
20160322_MKY0532_02	34.713	223.0566667	213.619605	207.0441705	16.01249615	6.575434455	0.516038039
20160322_MKY0532_02	34.916	223.0466667	213.5972933	207.0929635	15.95370313	6.504329809	0.521246399
20160322_MKY0532_02	35.119	223.0233333	213.5662034	206.9758603	16.04747304	6.590343067	0.515978322
20160322_MKY0532_02	35.322	222.88	213.4912217	206.9614792	15.9185208	6.529742454	0.516822588
20160322_MKY0532_02	35.525	222.88	213.5168252	207.0148947	15.86510529	6.501930455	0.51747801
20160322_MKY0532_02	35.728	222.9966667	213.625823	206.9496662	16.04700051	6.676156817	0.506685758
20160322_MKY0532_02	35.931	223.1266667	213.5676664	206.8736518	16.2530149	6.694014651	0.513902951
20160322_MKY0532_02	36.134	222.7966667	213.4524506	206.9126862	15.88398048	6.539764438	0.514151352
20160322_MKY0532_02	36.337	223.0533333	213.4089247	207.0225989	16.03073446	6.386325783	0.538244967
20160322_MKY0532_02	36.54	223.54	213.4996342	207.0431433	16.4968567	6.456490939	0.55155016
20160322_MKY0532_02	36.743	223.88	213.6415508	206.9522342	16.92776579	6.689316635	0.544288546
20160322_MKY0532_02	36.946	222.77	213.4996342	206.9424756	15.8275244	6.557158633	0.509692294
20160322_MKY0532_02	37.149	222.3633333	213.3112655	206.978942	15.38439137	6.332323583	0.514350149
20160322_MKY0532_02	37.352	222.9766667	213.4597659	206.9784284	15.99823832	6.48133756	0.525859382
20160322_MKY0532_02	37.555	223.0366667	213.3877103	206.9137134	16.12295326	6.47399691	0.532394983
20160322_MKY0532_02	37.758	222.61	213.3774689	206.9835645	15.62643554	6.393904452	0.518632558
20160322_MKY0532_02	37.961	222.0433333	213.2798098	206.9763739	15.06695942	6.303435893	0.502730762
20160322_MKY0532_02	38.164	222.2733333	213.2088515	206.8808423	15.39249101	6.328009178	0.515219989
20160322_MKY0532_02	38.367	222.5633333	213.3328456	206.9203903	15.64294299	6.412455303	0.517300734
20160322_MKY0532_02	38.57	222.4233333	213.3467447	206.914227	15.50910632	6.43251768	0.508883513
20160322_MKY0532_02	38.773	222.1433333	213.3997805	206.9275809	15.21575244	6.472199647	0.491077953
20160322_MKY0532_02	38.976	222.22	213.3778347	206.9799692	15.24003082	6.397865491	0.500293406
20160322_MKY0532_02	39.179	222.2933333	213.3002926	207.0174628	15.27587057	6.282829849	0.514902936
20160322_MKY0532_02	39.382	222.58	213.3496708	206.8515665	15.72843349	6.498104299	0.511673183
20160322_MKY0532_02	39.585	222.3666667	213.1503292	206.9727786	15.39388803	6.177550554	0.532836618
20160322_MKY0532_02	39.788	221.9333333	213.1613021	206.9013867	15.03194658	6.259915372	0.505996563
20160322_MKY0532_02	39.991	222.3566667	213.1426481	207.0020544	15.35461222	6.140593692	0.53538457
20160322_MKY0532_02	40.194	222.2333333	213.0881492	206.9460709	15.28726245	6.142078354	0.531957297
20160322_MKY0532_02	40.397	222.55	213.2307974	206.7991782	15.75082178	6.431619143	0.52011623
20160322_MKY0532_02	40.6	222.32	213.2315289	207.0734463	15.24655367	6.158082567	0.5280829
20160322_MKY0532_02	40.803	222.1533333	213.1089978	206.9599384	15.19339497	6.149059438	0.526598226
20160322_MKY0532_02	41.006	222.2033333	213.0965618	206.9933231	15.21001027	6.103238753	0.532899735
20160322_MKY0532_02	41.209	221.9133333	213.2048281	206.8859784	15.02735491	6.318849663	0.499146894
20160322_MKY0532_02	41.412	222.1933333	213.2831017	206.8936826	15.29965074	6.389419094	0.503990313
20160322_MKY0532_02	41.615	221.9133333	213.2564009	206.8767334	15.0365999	6.379667442	0.492860292
20160322_MKY0532_02	41.818	222.65	213.2721287	207.0477658	15.60223421	6.224362955	0.537200484
20160322_MKY0532_02	42.021	222.7066667	213.296635	206.8572162	15.84945044	6.439418737	0.523774682
20160322_MKY0532_02	42.224	222.7633333	213.2578639	206.865434	15.89789933	6.392429935	0.531379288
20160322_MKY0532_02	42.427	222.5533333	213.2070227	206.9054956	15.6478377	6.301527043	0.530251678
20160322_MKY0532_02	42.63	222.0866667	213.2871251	206.9301489	15.15651772	6.356976144	0.50094054
20160322_MKY0532_02	42.833	222.5366667	213.2688369	206.8366718	15.69999486	6.432165066	0.517713869
20160322_MKY0532_02	43.036	223.0266667	213.2556693	206.8269132	16.19975347	6.428756149	0.541125417
20160322_MKY0532_02	43.239	223.1166667	213.2362838	206.9060092	16.21065742	6.330274588	0.553248538
20160322_MKY0532_02	43.442	223.32	213.1247257	206.8875193	16.43248074	6.237206417	0.575102909
20160322_MKY0532_02	43.645	222.7366667	213.0427944	206.7380586	15.99860811	6.304735888	0.546358222
20160322_MKY0532_02	43.848	222.7366667	212.9286759	206.7431947	15.99347201	6.185481275	0.560604726
20160322_MKY0532_02	44.051	223.43	213.3050475	206.8731382	16.55686184	6.431909388	0.557206427
20160322_MKY0532_02	44.254	222.8866667	213.2611558	206.9532614	15.93340524	6.307894388	0.542919814
20160322_MKY0532_02	44.457	222.6633333	212.9963424	206.902414	15.76091936	6.093928386	0.560807471
20160322_MKY0532_02	44.66	222.7333333	213.0910753	206.9799692	15.75336415	6.111106164	0.558287682
20160322_MKY0532_02	44.863	222.8333333	213.0877835	206.9260401	15.90729327	6.161743405	0.559412411
20160322_MKY0532_02	45.066	223.1566667	213.1722751	206.9619928	16.19467386	6.210282246	0.567143155
20160322_MKY0532_02	45.269	223.2466667	213.2315289	206.7673344	16.47933231	6.464194534	0.549845082
20160322_MKY0532_02	45.472	223.0233333	213.119605	206.8412943	16.18203903	6.278310675	0.558176843
20160322_MKY0532_02	45.675	222.7133333	213.0501097	206.9270673	15.78626605	6.123042446	0.558390838
20160322_MKY0532_02	45.878	222.7933333	213.1302121	206.7688752	16.02445814	6.36133695	0.540873657
20160322_MKY0532_02	46.081	222.7966667	213.088515	206.8700565	15.92661017	6.218458499	0.553357768
20160322_MKY0532_02	46.284	222.91	213.076079	206.9589111	15.95108885	6.11716786	0.567105925
20160322_MKY0532_02	46.487	222.9833333	213.1122897	206.7955829	16.18775038	6.316706737	0.553803678
20160322_MKY0532_02	46.69	222.49	213.0691295	206.886492	15.60350796	6.182637442	0.542272755
20160322_MKY0532_02	46.893	222.42	213.0336503	207.0477658	15.37223421	5.985884535	0.555401042
20160322_MKY0532_02	47.096	222.41	212.9641551	206.8582435	15.55175655	6.105911633	0.549156354
20160322_MKY0532_02	47.299	222.7966667	212.8408925	206.8644068	15.93225989	5.976485685	0.584355372
20160322_MKY0532_02	47.502	223.0866667	213.006218	206.8633796	16.22328711	6.142838438	0.577004221
20160322_MKY0532_02	47.705	222.9266667	213.0903438	206.9404212	15.98624551	6.149922658	0.564685278
20160322_MKY0532_02	47.908	223.0566667	213.0541331	206.7241911	16.3324756	6.329942075	0.558989215
20160322_MKY0532_02	48.111	222.6533333	212.9572056	206.8140729	15.8392604	6.143132627	0.558448625
20160322_MKY0532_02	48.314	222.8533333	213.013899	206.7930149	16.06031844	6.220884154	0.559428892
20160322_MKY0532_02	48.517	223.1966667	212.9879298	206.9214176	16.2752491	6.066512208	0.589384583
20160322_MKY0532_02	48.72	222.8466667	212.9191661	206.9491525	15.89751412	5.970013515	0.583487427
20160322_MKY0532_02	48.923	222.4233333	212.8098025	206.9193631	15.50397021	5.890439364	0.574352509
20160322_MKY0532_02	49.126	222.8466667	212.930139	206.7955829	16.05108372	6.134556042	0.569745055
20160322_MKY0532_02	49.329	222.7633333	212.8386979	206.9286081	15.83472522	5.910089764	0.588338354
20160322_MKY0532_02	49.532	222.6933333	212.9458669	206.8346174	15.85871597	6.111249502	0.563376439
20160322_MKY0532_02	49.735	222.5666667	212.8522312	206.9717514	15.59491525	5.880479751	0.580254379
20160322_MKY0532_02	49.938	222.6866667	212.8339429	206.8541346	15.8325321	5.979808375	0.578976265
20160322_MKY0532_02	50.141	222.54	212.6470373	206.758603	15.78139702	5.888434329	0.588574421
20160322_MKY0532_02	50.344	222.9666667	212.8372348	206.8418079	16.12485876	5.995426911	0.591376623
20160322_MKY0532_02	50.547	222.7333333	212.7834674	206.8618387	15.87149461	5.921628721	0.588631169
20160322_MKY0532_02	50.75	223.2833333	212.9758595	206.816641	16.46669235	6.15921856	0.586630205
20160322_MKY0532_02	50.953	223.0833333	212.8891734	206.8659476	16.21738572	6.02322576	0.592250136
20160322_MKY0532_02	51.156	223.3833333	212.9337966	206.8253724	16.55796097	6.108424267	0.597641821
20160322_MKY0532_02	51.359	223.55	213.0098756	206.7925013	16.75749872	6.217374356	0.593077862
20160322_MKY0532_02	51.562	223.4633333	212.8957571	206.8911145	16.5722188	6.004642597	0.612223519
20160322_MKY0532_02	51.765	222.5433333	212.7509144	206.8079096	15.73542373	5.943004806	0.578992972
20160322_MKY0532_02	51.968	223.2233333	212.8613753	206.6414997	16.58183359	6.219875531	0.584390576
20160322_MKY0532_02	52.171	223.09	212.8533285	206.8176682	16.27233179	6.035660249	0.593303704
20160322_MKY0532_02	52.374	223.02	212.9615947	206.8844376	16.1355624	6.077157137	0.581183577
20160322_MKY0532_02	52.577	223.1366667	212.9261156	206.7914741	16.3451926	6.134641519	0.583936093
20160322_MKY0532_02	52.78	222.7633333	212.8445501	206.7288136	16.03451977	6.115736551	0.571327844
20160322_MKY0532_02	52.983	222.7933333	212.6839795	206.8222907	15.97104263	5.861688813	0.60178082
20160322_MKY0532_02	53.186	222.9166667	212.8061448	206.8751926	16.04147406	5.930952239	0.595872848
20160322_MKY0532_02	53.389	222.2833333	212.6883687	206.7873652	15.49596816	5.901003514	0.57255499
20160322_MKY0532_02	53.592	223.1533333	212.8156547	206.7370313	16.416302	6.078623388	0.594675052
20160322_MKY0532_02	53.795	223.4533333	212.9923189	206.9506934	16.50263996	6.041625573	0.603807417
20160322_MKY0532_02	53.998	223.59	212.8504023	206.8602979	16.72970211	5.990104447	0.621995754
20160322_MKY0532_02	54.201	223.7466667	212.9041697	206.8202363	16.92643041	6.083933454	0.618815031
20160322_MKY0532_02	54.404	223.2233333	212.7498171	206.7395994	16.48373395	6.010217734	0.607103961
20160322_MKY0532_02	54.607	222.8866667	212.8979517	206.6856703	16.2009964	6.212281457	0.567196045
20160322_MKY0532_02	54.81	222.8933333	212.8324799	206.6789933	16.21434001	6.15348656	0.575219732
20160322_MKY0532_02	55.013	223.2066667	212.8752743	206.8484848	16.35818182	6.026789475	0.598698898
20160322_MKY0532_02	55.216	223.4033333	213.0010973	206.902414	16.50091936	6.098683323	0.596153706
20160322_MKY0532_02	55.419	223.43	212.9473299	206.7709296	16.65907037	6.176400285	0.593653771
20160322_MKY0532_02	55.622	223.3966667	212.9604974	206.7529533	16.64371341	6.207544179	0.588912316
20160322_MKY0532_02	55.825	223.3466667	212.7860278	206.7354905	16.61117617	6.0505373	0.607929459
20160322_MKY0532_02	56.028	223.5333333	212.8244331	206.8022599	16.73107345	6.022173178	0.61765758
20160322_MKY0532_02	56.231	223.4233333	212.8569861	206.809964	16.61336929	6.047022054	0.60850966
20160322_MKY0532_02	56.434	223.5566667	212.7582297	206.6902928	16.86637391	6.067936942	0.618055818
20160322_MKY0532_02	56.637	223.1466667	212.8247988	206.9101181	16.23654854	5.9146807	0.60784701
20160322_MKY0532_02	56.84	223.48	212.7922458	206.8007191	16.67928094	5.991526739	0.619306481
20160322_MKY0532_02	57.043	223.61	212.7534748	206.7087827	16.90121726	6.044692019	0.622929718
20160322_MKY0532_02	57.246	223.45	212.6982443	206.6805342	16.76946584	6.017710176	0.620157852
20160322_MKY0532_02	57.449	223.8766667	212.6953182	206.835131	17.0415357	5.860187244	0.656100174
20160322_MKY0532_02	57.652	223.6833333	212.7659108	206.8269132	16.85642013	5.938997553	0.635435684
20160322_MKY0532_02	57.855	223.9166667	212.740673	206.7442219	17.17244479	5.996451127	0.642991809
20160322_MKY0532_02	58.058	223.5966667	212.7754206	206.8402671	16.75639959	5.935153551	0.630988128
20160322_MKY0532_02	58.261	223.4533333	212.7183614	206.7339497	16.71938367	5.984411709	0.622272
20160322_MKY0532_02	58.464	223.7566667	212.6653255	206.8505393	16.90612738	5.814786239	0.655927915
20160322_MKY0532_02	58.667	224.2666667	212.8558888	206.8998459	17.36682075	5.956042891	0.658414623
20160322_MKY0532_02	58.87	223.6933333	212.773226	206.7062147	16.98711864	6.067011353	0.624076912
20160322_MKY0532_02	59.073	224.1566667	212.8123628	206.7385722	17.41809451	6.073790676	0.644170478
20160322_MKY0532_02	59.276	223.7066667	212.7596928	206.742681	16.96398562	6.01701171	0.629830214
20160322_MKY0532_02	59.479	223.6933333	212.6960497	206.7817155	16.91161787	5.914334284	0.641706425
20160322_MKY0532_02	59.682	223.9733333	212.6591075	206.7128916	17.26044171	5.946215907	0.65454252
20160322_MKY0532_02	59.885	223.64	212.6510607	206.7021058	16.9378942	5.948954913	0.638085394
20160322_MKY0532_02	60.088	223.87	212.8017557	206.7606574	17.10934258	6.041098247	0.63362795
20160322_MKY0532_02	60.291	223.3966667	212.6159473	206.6086287	16.78803801	6.007318671	0.622501611
20160322_MKY0532_02	60.494	223.7133333	212.7245794	206.7205958	16.99273755	6.003983583	0.633061028
20160322_MKY0532_02	60.697	223.6233333	212.6283833	206.835131	16.78820236	5.79325235	0.653099401
20160322_MKY0532_02	60.9	223.62	212.7088515	206.8685157	16.75148434	5.840335835	0.644316515
20160322_MKY0532_02	61.103	223.1766667	212.5095099	206.8115049	16.36516179	5.698004997	0.645455907
20160322_MKY0532_02	61.306	223.66	212.532553	206.740113	16.91988701	5.792440042	0.659954188
20160322_MKY0532_02	61.509	223.34	212.4400146	206.6343092	16.70569081	5.805705437	0.647048048
20160322_MKY0532_02	61.712	223.74	212.5256035	206.7252183	17.01478171	5.800385226	0.663615247
20160322_MKY0532_02	61.915	223.5	212.5343819	206.6789933	16.82100668	5.855388535	0.645649456
20160322_MKY0532_02	62.118	223.2466667	212.5292612	206.7498716	16.49679507	5.779389559	0.640222159
20160322_MKY0532_02	62.321	223.6466667	212.5362107	206.67283	16.97383667	5.863380685	0.652210734
20160322_MKY0532_02	62.524	223.7533333	212.4326993	206.7534669	16.99986646	5.67923247	0.681374242
20160322_MKY0532_02	62.727	223.7	212.4089247	206.8500257	16.84997432	5.558898972	0.69258126
20160322_MKY0532_02	62.93	223.5966667	212.4725677	206.7390858	16.85758089	5.733481893	0.665632951
20160322_MKY0532_02	63.133	223.2066667	212.4400146	206.6990241	16.50764253	5.740990491	0.646437453
20160322_MKY0532_02	63.336	223.1066667	212.3738113	206.7051875	16.4014792	5.668623798	0.651763521
20160322_MKY0532_02	63.539	223.3466667	212.4400146	206.767848	16.5788187	5.67216666	0.660489689
20160322_MKY0532_02	63.742	223.68	212.4030724	206.6440678	17.0359322	5.759004624	0.670946907
20160322_MKY0532_02	63.945	223.6466667	212.3650329	206.7416538	16.90501284	5.623379093	0.685184667
20160322_MKY0532_02	64.148	223.4866667	212.3482078	206.6990241	16.78764253	5.649183614	0.674962344
20160322_MKY0532_02	64.351	223.8366667	212.3811266	206.7514124	17.08525424	5.629714125	0.693666627
20160322_MKY0532_02	64.554	224.1266667	212.5599854	206.6825886	17.44407807	5.877396771	0.67386642
20160322_MKY0532_02	64.757	223.7266667	212.4213606	206.6245506	17.10211608	5.796810053	0.668614117
20160322_MKY0532_02	64.96	223.7866667	212.4283102	206.6928608	17.09380586	5.735449356	0.677534854
20160322_MKY0532_02	65.163	224.3166667	212.518654	206.846944	17.46972265	5.671709971	0.707090413
20160322_MKY0532_02	65.366	223.42	212.3218727	206.7421674	16.67783256	5.579705277	0.680093956
20160322_MKY0532_02	65.569	223.4533333	212.2984638	206.584489	16.86884438	5.713974832	0.669190297
20160322_MKY0532_02	65.772	223.7733333	212.3778347	206.7560349	17.01729841	5.621799748	0.691351469
20160322_MKY0532_02	65.975	223.5933333	212.3957571	206.6928608	16.90047252	5.70289632	0.672532033
20160322_MKY0532_02	66.178	224.05	212.4992685	206.67283	17.37717001	5.826438476	0.678154221
20160322_MKY0532_02	66.381	224.14	212.5987564	206.8299949	17.31000514	5.768761537	0.683538547
20160322_MKY0532_02	66.584	223.7333333	212.4407462	206.6548536	17.07847971	5.785892538	0.669053049
20160322_MKY0532_02	66.787	223.5966667	212.4817118	206.575244	17.0214227	5.906467813	0.648341602
20160322_MKY0532_02	66.99	223.8866667	212.4396489	206.559322	17.32734463	5.880326832	0.66754776
20160322_MKY0532_02	67.193	223.7933333	212.3573519	206.6682075	17.12512583	5.689144366	0.686351495
20160322_MKY0532_02	67.396	223.68	212.2326262	206.6779661	17.0020339	5.554660087	0.701375752
20160322_MKY0532_02	67.599	223.6566667	212.2022677	206.6204417	17.03622496	5.581826035	0.69877744
20160322_MKY0532_02	67.802	223.7733333	212.2432334	206.4658449	17.30748844	5.777388468	0.682082219
20160322_MKY0532_02	68.005	224.01	212.3251646	206.7370313	17.27296867	5.588133264	0.710306797
20160322_MKY0532_02	68.208	224.48	212.4857352	206.7185413	17.76145865	5.767193841	0.706968745
20160322_MKY0532_02	68.411	224.5866667	212.4784199	206.8115049	17.77516179	5.666915019	0.723828719
20160322_MKY0532_02	68.614	224.1733333	212.3134601	206.5942476	17.57908577	5.719212572	0.705176475
20160322_MKY0532_02	68.817	223.5966667	212.2922458	206.6836158	16.91305085	5.608629975	0.687951023
20160322_MKY0532_02	69.02	223.9933333	212.2937089	206.7755521	17.2177812	5.51815672	0.718955595
20160322_MKY0532_02	69.223	224.0666667	212.3697879	206.6255778	17.44108886	5.744210045	0.694097667
20160322_MKY0532_02	69.426	223.78	212.2520117	206.6579353	17.12206471	5.594076419	0.701343078
20160322_MKY0532_02	69.629	223.6533333	212.2948061	206.6312275	17.0221058	5.663578615	0.68498827
20160322_MKY0532_02	69.832	223.8766667	212.2929773	206.6589625	17.21770416	5.634014817	0.699944388
20160322_MKY0532_02	70.035	223.66	212.1613021	206.6851567	16.97484335	5.47614547	0.712904937
20160322_MKY0532_02	70.238	223.5633333	212.2498171	206.6471495	16.91618387	5.602667657	0.689067303
20160322_MKY0532_02	70.441	223.9566667	212.366496	206.7185413	17.23812532	5.647954631	0.698781114
20160322_MKY0532_02	70.644	223.57	212.2743233	206.6676939	16.90230611	5.606629448	0.68770206
20160322_MKY0532_02	70.847	223.7533333	212.2264082	206.7498716	17.00346174	5.476536596	0.714387335
20160322_MKY0532_02	71.05	223.4166667	212.1082663	206.517206	16.89946071	5.591060319	0.690038098
20160322_MKY0532_02	71.253	223.8333333	212.2911485	206.7046739	17.12865948	5.586474643	0.702926531
20160322_MKY0532_02	71.456	224.19	212.403804	206.6795069	17.51049307	5.724297016	0.700818122
20160322_MKY0532_02	71.659	223.8033333	212.3427213	206.6527992	17.15053416	5.689922109	0.687552416
20160322_MKY0532_02	71.862	223.9	212.1002195	206.6466359	17.25336415	5.453583609	0.731832449
20160322_MKY0532_02	72.065	223.6066667	212.2677396	206.6178737	16.98879302	5.649865924	0.685402539
20160322_MKY0532_02	72.268	223.7733333	212.2249451	206.7349769	17.03835645	5.489968247	0.714020007
20160322_MKY0532_02	72.471	223.8166667	212.2055596	206.6281459	17.1885208	5.577413755	0.707581419
20160322_MKY0532_02	72.674	223.7366667	212.1843453	206.6142784	17.12238829	5.570066905	0.705268482
20160322_MKY0532_02	72.877	223.23	212.1503292	206.6379045	16.59209553	5.51242472	0.686293497
20160322_MKY0532_02	73.08	223.78	212.3119971	206.6738572	17.10614278	5.638139858	0.693420626
20160322_MKY0532_02	73.283	224.1133333	212.3262619	206.69132	17.42201335	5.634941908	0.710535936
20160322_MKY0532_02	73.486	223.67	212.1923921	206.7550077	16.9149923	5.437384395	0.716190054
20160322_MKY0532_02	73.689	223.9633333	212.2970007	206.6933744	17.26995891	5.60362631	0.7076161
20160322_MKY0532_02	73.892	223.76	212.315289	206.7015922	17.05840781	5.613696761	0.694815066
20160322_MKY0532_02	74.095	224.08	212.2695684	206.63585	17.44414997	5.633718372	0.711898815
20160322_MKY0532_02	74.298	224.11	212.1419166	206.7241911	17.38580894	5.417725543	0.745276991
20160322_MKY0532_02	74.501	223.71	212.2026335	206.7200822	16.98991782	5.482551326	0.712646546
20160322_MKY0532_02	74.704	223.63	212.0270666	206.6687211	16.96127889	5.35834546	0.732342011
20160322_MKY0532_02	74.907	223.7733333	212.1075347	206.6219825	17.1513508	5.485552211	0.720861973
20160322_MKY0532_02	75.11	223.8366667	212.1784931	206.7473035	17.08936312	5.431189506	0.726751683
20160322_MKY0532_02	75.313	223.1966667	211.9272129	206.6954289	16.5012378	5.23178401	0.728977371
20160322_MKY0532_02	75.516	224.17	212.1737381	206.6070878	17.56291217	5.566650286	0.729269727
20160322_MKY0532_02	75.719	224.23	212.1207023	206.663585	17.566415	5.457117265	0.748218882
20160322_MKY0532_02	75.922	223.9733333	211.9136796	206.5536723	17.41966102	5.360007274	0.757384367
20160322_MKY0532_02	76.125	223.8566667	212.0460863	206.7421674	17.11449923	5.303918883	0.750521526
20160322_MKY0532_02	76.328	223.5366667	212.0665691	206.6230098	16.91365691	5.44355937	0.71507204
20160322_MKY0532_02	76.531	223.4133333	212.1207023	206.65434	16.75899332	5.466362258	0.702851193
20160322_MKY0532_02	76.734	223.3033333	211.9524506	206.6379045	16.66542887	5.314546154	0.723579393
20160322_MKY0532_02	76.937	223.6866667	212.1152158	206.4735491	17.21311762	5.641666751	0.698475708
20160322_MKY0532_02	77.14	223.3966667	212.0468178	206.6887519	16.70791474	5.358065923	0.718383364
20160322_MKY0532_02	77.343	223.6866667	212.1466715	206.7395994	16.94706728	5.40707216	0.723113394
20160322_MKY0532_02	77.546	223.7966667	212.1104609	206.6615306	17.13513611	5.448930303	0.726205384
20160322_MKY0532_02	77.749	223.9166667	211.9956108	206.5665126	17.35015408	5.429098244	0.741340244
20160322_MKY0532_03	-2.639	339.2840909	227.6617265	207.8152902	131.4688007	19.84643629	1.009569939
20160322_MKY0532_03	-2.436	333.7443182	226.8920957	207.7606027	125.9837155	19.13149301	1.00325382
20160322_MKY0532_03	-2.233	334.0625	226.7774311	207.7103795	126.3521205	19.06705163	1.009960801
20160322_MKY0532_03	-2.03	333.0340909	226.6567863	207.6534598	125.3806311	19.00332645	1.005298833
20160322_MKY0532_03	-1.827	331.0056818	226.3606344	207.3885789	123.6171029	18.97205556	0.992058447
20160322_MKY0532_03	-1.624	330.75	226.4157566	207.5409226	123.2090774	18.87483401	0.993985202
20160322_MKY0532_03	-1.421	332.7840909	226.4037962	207.453311	125.3307799	18.95048514	1.0078422
20160322_MKY0532_03	-1.218	331.4715909	226.3042122	207.4107143	124.0608766	18.89349788	1.00021766
20160322_MKY0532_03	-1.015	330.9090909	226.3265731	207.25	123.6590909	19.07657306	0.986654843
20160322_MKY0532_03	-0.812	328.4943182	226.0546022	207.3896949	121.1046232	18.66490724	0.987640549
20160322_MKY0532_03	-0.609	331.25	226.1393656	207.3115699	123.9384301	18.82779564	1.0028649
20160322_MKY0532_03	0	211.4545455	218.7917317	207.2219122	4.232633253	11.56981947	0
20160322_MKY0532_03	0.203	212.3636364	218.7269891	207.1428571	5.220779221	11.58413194	0.013687325
20160322_MKY0532_03	0.406	212.6363636	218.7685907	207.1843378	5.452025838	11.58425295	0.016906712
20160322_MKY0532_03	0.609	212.4034091	218.7376495	207.1746652	5.228743912	11.56298433	0.013931402
20160322_MKY0532_03	0.812	213.0909091	218.6643266	207.0731027	6.017806412	11.59122389	0.024734903
20160322_MKY0532_03	1.015	212.9772727	218.6424857	207.1013765	5.875896239	11.54110921	0.023115052
20160322_MKY0532_03	1.218	213.1761364	218.5933437	207.0531994	6.122936959	11.54014433	0.02657515
20160322_MKY0532_03	1.421	212.9261364	218.550182	207.0846354	5.841500947	11.46554659	0.023172395
20160322_MKY0532_03	1.624	213.2272727	218.5678627	207.0433408	6.183931953	11.52452194	0.02754494
20160322_MKY0532_03	1.827	213.5113636	218.4706188	207.0649182	6.446445481	11.40570067	0.032159452
20160322_MKY0532_03	2.03	213.9886364	218.3863755	207.077381	6.911255412	11.3089945	0.039569192
20160322_MKY0532_03	2.233	214.0738636	218.3962559	207.0394345	7.034429112	11.35682133	0.040903594
20160322_MKY0532_03	2.436	214.2613636	218.3320333	206.983817	7.277546672	11.34821632	0.044435225
20160322_MKY0532_03	2.639	213.9886364	218.4716589	206.9497768	7.038859578	11.52188208	0.039534224
20160322_MKY0532_03	2.842	214.7897727	218.474779	206.9555432	7.834229572	11.51923584	0.050695033
20160322_MKY0532_03	3.045	214.6306818	218.3429537	207.0093006	7.621381223	11.33365312	0.049461971
20160322_MKY0532_03	3.248	214.2897727	218.3023921	206.9388021	7.350970644	11.36359001	0.045337565
20160322_MKY0532_03	3.451	214.5397727	218.174467	206.9347098	7.605062906	11.23975716	0.050133967
20160322_MKY0532_03	3.654	214.7215909	218.2059282	206.8835565	7.838034361	11.32237169	0.052656765
20160322_MKY0532_03	3.857	214.9943182	218.3619345	206.8999256	8.094392587	11.46200888	0.054904231
20160322_MKY0532_03	4.06	215.4375	218.3632345	206.9607515	8.476748512	11.40248304	0.060908177
20160322_MKY0532_03	4.263	215.3181818	218.1146646	206.8818824	8.436299378	11.23278215	0.062139028
20160322_MKY0532_03	4.466	215.2102273	218.1115445	207.0132068	8.197020428	11.09833762	0.060128781
20160322_MKY0532_03	4.669	215.4034091	218.099584	206.8498884	8.553520698	11.24969559	0.063637751
20160322_MKY0532_03	4.872	215.4659091	218.2444098	206.8696057	8.596303436	11.37480412	0.062895466
20160322_MKY0532_03	5.075	215.7670455	218.0943838	206.8844866	8.882558848	11.20989717	0.068808122
20160322_MKY0532_03	5.278	216.4147727	218.1729069	206.718006	9.696766775	11.45490096	0.077540209
20160322_MKY0532_03	5.481	216.1590909	218.2691108	206.8078497	9.351241207	11.46126106	0.0726013
20160322_MKY0532_03	5.684	216.0056818	218.074363	206.8353795	9.170302354	11.23898351	0.072607291
20160322_MKY0532_03	5.887	216.0113636	218.1071243	206.8301711	9.181192505	11.27695315	0.072319901
20160322_MKY0532_03	6.09	216.7613636	218.2085283	206.7676711	9.993692505	11.44085721	0.081894393
20160322_MKY0532_03	6.293	216.5909091	218.098804	206.9010417	9.689867424	11.19776229	0.080576559
20160322_MKY0532_03	6.496	216.0738636	217.9669787	206.7317708	9.342092803	11.23520785	0.075118052
20160322_MKY0532_03	6.699	216.4147727	217.9713989	206.6960565	9.718716179	11.27534231	0.080028838
20160322_MKY0532_03	6.902	216.8693182	218.0837233	206.8805804	9.988737825	11.20314299	0.084812912
20160322_MKY0532_03	7.105	217.3465909	218.0270411	206.812686	10.5339049	11.21435507	0.092511057
20160322_MKY0532_03	7.308	216.7272727	217.9196568	206.7581845	9.969088203	11.16147226	0.085065892
20160322_MKY0532_03	7.511	217.1818182	218.1411856	206.718378	10.46344021	11.42280767	0.088750812
20160322_MKY0532_03	7.714	217.5511364	218.0416017	206.8677455	10.68339083	11.17385613	0.095218319
20160322_MKY0532_03	7.917	217.3352273	217.8484139	206.828683	10.50654424	11.0197309	0.09478668
20160322_MKY0532_03	8.12	217.1306818	217.8224129	206.8506324	10.28004938	10.97178046	0.092128799
20160322_MKY0532_03	8.323	217.1647727	217.8572543	206.7909226	10.37385011	11.06633167	0.092204754
20160322_MKY0532_03	8.526	216.4261364	217.7111284	206.7849702	9.641166126	10.92615821	0.083327493
20160322_MKY0532_03	8.729	216.6590909	217.7969319	206.8143601	9.84473079	10.98257176	0.085586306
20160322_MKY0532_03	8.932	217.3011364	217.8143526	206.9153646	10.38577178	10.89898799	0.094703019
20160322_MKY0532_03	9.135	217.3636364	217.8385335	206.7633929	10.60024351	11.07514068	0.095381962
20160322_MKY0532_03	9.338	217.3465909	217.7103484	206.6884301	10.65816085	11.02191835	0.096975159
20160322_MKY0532_03	9.541	217.5681818	217.8575143	206.7431176	10.82506426	11.11439674	0.09809965
20160322_MKY0532_03	9.744	217.9545455	217.7295892	206.8180804	11.1364651	10.91150883	0.105624665
20160322_MKY0532_03	9.947	217.9886364	217.7197088	206.7726935	11.21594291	10.94701534	0.106261829
20160322_MKY0532_03	10.15	218.3806818	217.8520541	206.8245908	11.55609104	11.02746331	0.110031881
20160322_MKY0532_03	10.353	218.4204545	217.8650546	206.8097098	11.61074472	11.05534478	0.110403022
20160322_MKY0532_03	10.556	218.0965909	217.725169	206.8048735	11.2917174	10.9202955	0.107785553
20160322_MKY0532_03	10.759	218.6306818	217.9469579	206.656064	11.97461783	11.29089389	0.112067317
20160322_MKY0532_03	10.962	218.9829545	217.825013	206.8097098	12.17324472	11.01530318	0.119256347
20160322_MKY0532_03	11.165	218.9602273	217.8213729	206.6276042	12.33262311	11.19376869	0.118710927
20160322_MKY0532_03	11.368	218.6818182	217.7423297	206.6491815	12.03263663	11.09314814	0.115960684
20160322_MKY0532_03	11.571	218.4659091	217.7074883	206.6361607	11.82974838	11.07132759	0.113349398
20160322_MKY0532_03	11.774	219.0795455	217.698908	206.7723214	12.30722403	10.92658653	0.122681759
20160322_MKY0532_03	11.977	219.1590909	217.7124285	206.702567	12.45652395	11.00986153	0.123494964
20160322_MKY0532_03	12.18	219.3011364	217.6773271	206.6396949	12.66144142	11.03763215	0.126030598
20160322_MKY0532_03	12.383	219.5170455	217.5605824	206.7738095	12.74323593	10.7867729	0.131557232
20160322_MKY0532_03	12.586	219.2329545	217.4461778	206.6344866	12.59846794	10.81169124	0.128958045
20160322_MKY0532_03	12.789	218.9431818	217.5319813	206.6527158	12.29046604	10.87926551	0.123223592
20160322_MKY0532_03	12.992	219.6363636	217.5579823	206.7767857	12.85957792	10.7811966	0.133396556
20160322_MKY0532_03	13.195	220.125	217.6084243	206.7581845	13.36681548	10.85023981	0.139713393
20160322_MKY0532_03	13.398	220.6306818	217.6570463	206.7178199	13.91286188	10.93922634	0.146148962
20160322_MKY0532_03	13.601	219.625	217.5884035	206.8054315	12.81956845	10.78297199	0.132766337
20160322_MKY0532_03	13.804	220.8579545	217.5377015	206.7384673	14.11948728	10.79923425	0.151894964
20160322_MKY0532_03	14.007	220.5284091	217.4906396	206.5398065	13.98860254	10.95083308	0.147047218
20160322_MKY0532_03	14.21	220.4602273	217.6170047	206.7163318	13.74389543	10.90067283	0.144374147
20160322_MKY0532_03	14.413	220.6931818	217.6344254	206.5922619	14.10091991	11.04216347	0.146983697
20160322_MKY0532_03	14.616	220.1022727	217.4225169	206.7801339	13.3221388	10.64238297	0.14291755
20160322_MKY0532_03	14.819	220.8352273	217.5130005	206.6616443	14.17358293	10.85135617	0.151686082
20160322_MKY0532_03	15.022	221.2727273	217.6469059	206.6700149	14.60271239	10.976891	0.1555828
20160322_MKY0532_03	15.225	221.2897727	217.5592824	206.6346726	14.65510011	10.92460975	0.157383337
20160322_MKY0532_03	15.428	220.9034091	217.5377015	206.6633185	14.24009064	10.87438306	0.152226506
20160322_MKY0532_03	15.631	221.3977273	217.4986999	206.6292783	14.768449	10.86942167	0.160164271
20160322_MKY0532_03	15.834	221.6704545	217.5465419	206.7139137	14.95654086	10.83262817	0.163709663
20160322_MKY0532_03	16.037	221.9375	217.6099844	206.6609003	15.2765997	10.9490841	0.166056168
20160322_MKY0532_03	16.24	222.1704545	217.6024441	206.6768973	15.49355722	10.92554678	0.169744361
20160322_MKY0532_03	16.443	223.0681818	217.5156006	206.6153274	16.45285444	10.90027324	0.184471355
20160322_MKY0532_03	16.646	222.7443182	217.4134165	206.6897321	16.05458604	10.72368439	0.182489855
20160322_MKY0532_03	16.849	222.3977273	217.5169007	206.5487351	15.84899215	10.96816556	0.174082985
20160322_MKY0532_03	17.052	222.5852273	217.3614145	206.6341146	15.95111269	10.72729987	0.180852471
20160322_MKY0532_03	17.255	222.7272727	217.4035361	206.734375	15.99289773	10.66916114	0.182791327
20160322_MKY0532_03	17.458	222.7386364	217.3185127	206.5797991	16.15883726	10.73871363	0.183717881
20160322_MKY0532_03	17.661	222.9431818	217.25013	206.6463914	16.29679045	10.60373864	0.188906266
20160322_MKY0532_03	17.864	222.9545455	217.3265731	206.640253	16.31429248	10.68632009	0.187254595
20160322_MKY0532_03	18.067	222.7670455	217.2150286	206.7280506	16.03899486	10.48697801	0.187701115
20160322_MKY0532_03	18.27	223.4090909	217.4162767	206.562128	16.84696293	10.85414868	0.191363219
20160322_MKY0532_03	18.473	223.0852273	217.3829953	206.6328125	16.45241477	10.75018282	0.187864213
20160322_MKY0532_03	18.676	223.3352273	217.3200728	206.5890997	16.74612757	10.7309731	0.192721371
20160322_MKY0532_03	18.879	223.3693182	217.4349974	206.5889137	16.78040449	10.84608371	0.190559478
20160322_MKY0532_03	19.082	223.625	217.4472179	206.5699405	17.05505952	10.87727741	0.193916956
20160322_MKY0532_03	19.285	223.7784091	217.3460738	206.6458333	17.13257576	10.70024051	0.19927033
20160322_MKY0532_03	19.488	223.1477273	217.2415497	206.6315104	16.51621686	10.61003925	0.192095152
20160322_MKY0532_03	19.691	223.4147727	217.3790952	206.5228795	16.89189326	10.8562157	0.191983167
20160322_MKY0532_03	19.894	223.3636364	217.3385335	206.6075149	16.75612148	10.73101866	0.192870535
20160322_MKY0532_03	20.097	223.8579545	217.2550702	206.624256	17.23369859	10.63081425	0.20249154
20160322_MKY0532_03	20.3	223.5113636	217.2683307	206.7373512	16.77401245	10.53097954	0.197929202
20160322_MKY0532_03	20.503	223.4318182	217.3031721	206.499628	16.93219021	10.80354415	0.193808568
20160322_MKY0532_03	20.706	224.3579545	217.3853354	206.6703869	17.68756764	10.71494851	0.207271148
20160322_MKY0532_03	20.909	223.5227273	217.3390536	206.5126488	17.01007846	10.82640475	0.194435248
20160322_MKY0532_03	21.112	224.3693182	217.3845554	206.6261161	17.74320211	10.75843931	0.207028883
20160322_MKY0532_03	21.315	224.3068182	217.2477899	206.6387649	17.6680533	10.60902503	0.20963309
20160322_MKY0532_03	21.518	224.3465909	217.2875715	206.531622	17.81496889	10.75594948	0.208166791
20160322_MKY0532_03	21.721	224.5	217.2405096	206.7459077	17.75409226	10.49460188	0.213884664
20160322_MKY0532_03	21.924	224.9602273	217.2828913	206.4551711	18.50505614	10.82772019	0.216676805
20160322_MKY0532_03	22.127	225.0056818	217.3133125	206.5535714	18.45211039	10.7597411	0.217624817
20160322_MKY0532_03	22.33	223.5284091	217.2774311	206.4962798	17.03212933	10.78115134	0.195829024
20160322_MKY0532_03	22.533	223.1477273	217.2841914	206.6791295	16.46859781	10.6050619	0.191488677
20160322_MKY0532_03	22.736	224.3977273	217.2566303	206.6774554	17.72027192	10.57917491	0.211187338
20160322_MKY0532_03	22.939	224.2272727	217.2077483	206.6315104	17.59576231	10.57623789	0.209363307
20160322_MKY0532_03	23.142	224.9545455	217.4277171	206.6795015	18.27504397	10.74821562	0.215263993
20160322_MKY0532_03	23.345	225.1477273	217.5065003	206.5833333	18.56439394	10.92316693	0.215144116
20160322_MKY0532_03	23.548	224.8409091	217.3458138	206.6203497	18.22055939	10.72546413	0.21502635
20160322_MKY0532_03	23.751	225.1193182	217.3447738	206.5096726	18.60964556	10.83510117	0.218046126
20160322_MKY0532_03	23.954	225.7443182	217.3590744	206.6010045	19.14331372	10.7580699	0.228032087
20160322_MKY0532_03	24.157	224.8181818	217.2644306	206.5600818	18.25809997	10.70434873	0.216132651
20160322_MKY0532_03	24.36	224.9886364	217.3281331	206.5957961	18.39284023	10.73233699	0.217440329
20160322_MKY0532_03	24.563	224.7159091	217.3034321	206.4827009	18.2332082	10.82073124	0.212802232
20160322_MKY0532_03	24.766	225.0965909	217.2399896	206.6344866	18.4621043	10.60550299	0.22180004
20160322_MKY0532_03	24.969	224.4829545	217.1846074	206.5279018	17.95505276	10.6567056	0.212775469
20160322_MKY0532_03	25.172	224.6136364	217.1094644	206.5602679	18.05336851	10.54919652	0.21704872
20160322_MKY0532_03	25.375	225.0284091	217.175507	206.4674479	18.56096117	10.7080591	0.220599795
20160322_MKY0532_03	25.578	224.3522727	217.2311492	206.4568452	17.89542749	10.77430401	0.208916261
20160322_MKY0532_03	25.781	224.5965909	217.2464899	206.5360863	18.0605046	10.71040355	0.213001062
20160322_MKY0532_03	25.984	224.6022727	217.1222049	206.6289063	17.97336648	10.49329864	0.217289442
20160322_MKY0532_03	26.187	225.9204545	217.1216849	206.5364583	19.38399621	10.58522653	0.23638704
20160322_MKY0532_03	26.39	225.875	217.0717629	206.5453869	19.3296131	10.52637597	0.237205158
20160322_MKY0532_03	26.593	226.5	217.3101924	206.5811012	19.91889881	10.72909122	0.240468356
20160322_MKY0532_03	26.796	227.2329545	217.2087884	206.5598958	20.67305871	10.64889252	0.254148048
20160322_MKY0532_03	26.999	227.6647727	217.1063443	206.609375	21.05539773	10.49696925	0.264556067
20160322_MKY0532_03	27.202	227.4147727	217.2150286	206.6521577	20.76261499	10.56287086	0.25806604
20160322_MKY0532_03	27.405	227.5909091	217.2207488	206.516183	21.07472605	10.70456579	0.258572261
20160322_MKY0532_03	27.608	228.0909091	217.2623505	206.4486607	21.64224838	10.81368978	0.263833395
20160322_MKY0532_03	27.811	227.5681818	217.125065	206.5513393	21.01684253	10.57372572	0.261619022
20160322_MKY0532_03	28.014	227.2443182	217.0590224	206.5334821	20.71083604	10.52554022	0.258397063
20160322_MKY0532_03	28.217	227.9261364	217.1578263	206.6039807	21.32215571	10.55384566	0.266889619
20160322_MKY0532_03	28.42	228.2102273	217.2727509	206.5292039	21.6810234	10.74354704	0.266523407
20160322_MKY0532_03	28.623	227.6647727	217.125845	206.4906994	21.17407332	10.63514563	0.262152168
20160322_MKY0532_03	28.826	227.5113636	217.0670827	206.4910714	21.02029221	10.57601125	0.261602349
20160322_MKY0532_03	29.029	227.3011364	216.975559	206.5217634	20.77937297	10.45379563	0.261633052
20160322_MKY0532_03	29.232	227.2784091	217.1125845	206.500558	20.77785105	10.61202647	0.256828909
20160322_MKY0532_03	29.435	227.0056818	217.0127405	206.4893973	20.5162845	10.52334319	0.255481045
20160322_MKY0532_03	29.638	227.4261364	217.0083203	206.4614955	20.96464083	10.5468248	0.261638414
20160322_MKY0532_03	29.841	228.375	217.0293812	206.5362723	21.83872768	10.49310885	0.276717392
20160322_MKY0532_03	30.044	228.5909091	216.9784191	206.5913318	21.99957725	10.38708729	0.282642229
20160322_MKY0532_03	30.247	228.3863636	217.025221	206.5879836	21.79838001	10.43723738	0.277890998
20160322_MKY0532_03	30.45	228.4204545	217.0221009	206.4799107	21.94054383	10.54219017	0.27671228
20160322_MKY0532_03	30.653	228.4772727	216.9100364	206.5643601	21.91291261	10.34567628	0.282658488
20160322_MKY0532_03	30.856	229.0227273	216.9838794	206.5580357	22.46469156	10.42584364	0.288568605
20160322_MKY0532_03	31.059	227.8806818	216.8910556	206.5370164	21.34366545	10.35403927	0.27351383
20160322_MKY0532_03	31.262	228.5681818	216.8793552	206.5020461	22.06613569	10.37730904	0.283998795
20160322_MKY0532_03	31.465	229.2272727	216.7802912	206.5701265	22.65714624	10.21016472	0.298951545
20160322_MKY0532_03	31.668	228.7159091	216.8866355	206.4880952	22.22781385	10.39854023	0.285806565
20160322_MKY0532_03	31.871	229.2840909	216.8328133	206.656064	22.62802692	10.17674933	0.299665352
20160322_MKY0532_03	32.074	229.8295455	216.99948	206.4665179	23.3630276	10.53296212	0.298791793
20160322_MKY0532_03	32.277	228.9545455	216.7111284	206.6201637	22.33438176	10.09096476	0.298020361
20160322_MKY0532_03	32.48	229.7102273	216.7878315	206.5096726	23.20055465	10.27815889	0.305112093
20160322_MKY0532_03	32.683	229.8465909	216.75013	206.4626116	23.3839793	10.2875184	0.307656989
20160322_MKY0532_03	32.886	229.6477273	216.8122725	206.421131	23.22659632	10.39114154	0.301557234
20160322_MKY0532_03	33.089	229.4147727	216.8684347	206.515067	22.89970576	10.35336777	0.297779579
20160322_MKY0532_03	33.292	230.375	216.8556942	206.5087426	23.86625744	10.34695167	0.313069706
20160322_MKY0532_03	33.495	230.0852273	216.9360374	206.4667039	23.6185234	10.46933357	0.304903102
20160322_MKY0532_03	33.698	230.0284091	216.7563703	206.5132068	23.51520225	10.24316341	0.311311289
20160322_MKY0532_03	33.901	230.7215909	216.8312533	206.5359003	24.18569061	10.29535295	0.319939564
20160322_MKY0532_03	34.104	230.4829545	216.9118565	206.6380208	23.84493371	10.27383564	0.315382909
20160322_MKY0532_03	34.307	231.3011364	216.8512741	206.5980283	24.70310809	10.25324578	0.329636261
20160322_MKY0532_03	34.51	230.7045455	216.7925117	206.5835193	24.12102611	10.20899235	0.322123465
20160322_MKY0532_03	34.713	230.3806818	216.7802912	206.6789435	23.70173837	10.10134776	0.319489257
20160322_MKY0532_03	34.916	230.2897727	216.6354654	206.5487351	23.74103761	10.0867303	0.32066627
20160322_MKY0532_03	35.119	230.4602273	216.7082683	206.5595238	23.90070346	10.14874452	0.320884087
20160322_MKY0532_03	35.322	230.8977273	216.8185127	206.4667039	24.4310234	10.35180887	0.321695888
20160322_MKY0532_03	35.525	230.2897727	216.7126885	206.4601935	23.82957928	10.25249506	0.315920629
20160322_MKY0532_03	35.728	230.4659091	216.7797712	206.625558	23.84035105	10.15421316	0.319720715
20160322_MKY0532_03	35.931	231.1420455	216.8281331	206.5868676	24.55517789	10.24126556	0.327760819
20160322_MKY0532_03	36.134	231.4090909	216.8057722	206.5504092	24.85868168	10.255363	0.332003132
20160322_MKY0532_03	36.337	231.2272727	216.5595424	206.4813988	24.74587392	10.07814357	0.337073357
20160322_MKY0532_03	36.54	230.9488636	216.5538222	206.4962798	24.45258387	10.05754239	0.333180605
20160322_MKY0532_03	36.743	232.2215909	216.7826313	206.4760045	25.74558645	10.30662684	0.343939521
20160322_MKY0532_03	36.946	231.75	216.6703068	206.4832589	25.26674107	10.18704788	0.34108697
20160322_MKY0532_03	37.149	231.4659091	216.4365575	206.562686	24.90322308	9.87387145	0.347838328
20160322_MKY0532_03	37.352	232.1306818	216.6476859	206.5866815	25.54400027	10.06100436	0.350544822
20160322_MKY0532_03	37.555	232.1022727	216.6315653	206.5504092	25.5518635	10.08115604	0.34985196
20160322_MKY0532_03	37.758	232.6534091	216.7043682	206.5107887	26.1426204	10.19357949	0.354691326
20160322_MKY0532_03	37.961	233.4318182	216.6560062	206.5900298	26.84178842	10.06597648	0.371140263
20160322_MKY0532_03	38.164	232.4090909	216.5197608	206.4964658	25.91262514	10.02329502	0.358018215
20160322_MKY0532_03	38.367	233.4375	216.6586063	206.5020461	26.93545387	10.15656021	0.368791483
20160322_MKY0532_03	38.57	233.2102273	216.7290692	206.4862351	26.72399215	10.24283404	0.361857872
20160322_MKY0532_03	38.773	232.7386364	216.6154446	206.3835565	26.35507982	10.23188807	0.356491964
20160322_MKY0532_03	38.976	233.0284091	216.7605304	206.5193452	26.50906385	10.24118518	0.35854022
20160322_MKY0532_03	39.179	232.8920455	216.5205408	206.4361979	26.45584754	10.08434291	0.364183189
20160322_MKY0532_03	39.382	232.2840909	216.6430057	206.4159226	25.86816829	10.2270831	0.349007085
20160322_MKY0532_03	39.585	233.0625	216.6170047	206.4944196	26.56808036	10.12258504	0.364372925
20160322_MKY0532_03	39.788	233.3465909	216.4851794	206.5459449	26.80064597	9.939234467	0.375957714
20160322_MKY0532_03	39.991	232.1477273	216.4061362	206.5323661	25.6153612	9.873770174	0.35947705
20160322_MKY0532_03	40.194	232.2215909	216.4672387	206.5671503	25.65444061	9.900088392	0.359001304
20160322_MKY0532_03	40.397	232.2670455	216.4807592	206.4726563	25.7943892	10.00810298	0.356745508
20160322_MKY0532_03	40.6	232.6193182	216.5613625	206.5816592	26.03765896	9.979703228	0.361860884
20160322_MKY0532_03	40.803	233.1988636	216.5852834	206.5593378	26.63952584	10.02594561	0.369603443
20160322_MKY0532_03	41.006	232.6306818	216.6983879	206.5768229	26.0538589	10.12156502	0.356220179
20160322_MKY0532_03	41.209	232.9431818	216.5967239	206.4921875	26.45099432	10.10453637	0.36325997
20160322_MKY0532_03	41.412	233.5909091	216.6313053	206.4447545	27.14615463	10.18655079	0.370868591
20160322_MKY0532_03	41.615	232.875	216.5819033	206.5107887	26.36421131	10.07111459	0.363271284
20160322_MKY0532_03	41.818	233.6761364	216.5387416	206.4339658	27.24217059	10.10477578	0.375880302
20160322_MKY0532_03	42.021	233.0795455	216.4323973	206.5288318	26.55071361	9.903565451	0.373453339
20160322_MKY0532_03	42.224	232.6534091	216.4126365	206.4756324	26.17777665	9.937004065	0.36594398
20160322_MKY0532_03	42.427	232.5170455	216.4615185	206.4579613	26.05908414	10.00355715	0.361202783
20160322_MKY0532_03	42.63	232.3579545	216.449038	206.4663318	25.8916227	9.982706117	0.359374451
20160322_MKY0532_03	42.833	232.8579545	216.3390536	206.5587798	26.29917478	9.7802738	0.374756286
20160322_MKY0532_03	43.036	232.9772727	216.4378575	206.4920015	26.48527124	9.945856026	0.37055304
20160322_MKY0532_03	43.239	233.4261364	216.5611024	206.3355655	27.09057089	10.22553697	0.36835275
20160322_MKY0532_03	43.442	232.5681818	216.4524181	206.5420387	26.02614313	9.910379407	0.364617487
20160322_MKY0532_03	43.645	233.1136364	216.4651586	206.4853051	26.6283313	9.979853546	0.37140207
20160322_MKY0532_03	43.848	233.6022727	216.4672387	206.5340402	27.06823255	9.933198511	0.380567564
20160322_MKY0532_03	44.051	233.1022727	216.4677587	206.4832589	26.6190138	9.984499781	0.371051242
20160322_MKY0532_03	44.254	233.4886364	216.5015601	206.4127604	27.07587595	10.08879965	0.373910047
20160322_MKY0532_03	44.457	234.1079545	216.4950598	206.453869	27.6540855	10.04119075	0.385251681
20160322_MKY0532_03	44.66	235.1818182	216.5197608	206.5141369	28.66768128	10.00562389	0.403172294
20160322_MKY0532_03	44.863	235.4204545	216.6708268	206.4136905	29.00676407	10.25713636	0.397171867
20160322_MKY0532_03	45.066	234.4715909	216.4828393	206.484747	27.98684389	9.99809229	0.392535599
20160322_MKY0532_03	45.269	234.3352273	216.3577743	206.5416667	27.79356061	9.816107644	0.397730733
20160322_MKY0532_03	45.472	233.7897727	216.375195	206.5948661	27.19490666	9.780328937	0.389527664
20160322_MKY0532_03	45.675	233.5738636	216.4227769	206.4728423	27.10102137	9.949934649	0.38035976
20160322_MKY0532_03	45.878	234.3068182	216.2873115	206.4477307	27.85908753	9.839580837	0.397715394
20160322_MKY0532_03	46.081	235.0227273	216.4604784	206.5046503	28.51807697	9.955828121	0.403059982
20160322_MKY0532_03	46.284	235.0681818	216.4050962	206.3502604	28.7179214	10.05483579	0.40171621
20160322_MKY0532_03	46.487	235.0511364	216.3385335	206.406436	28.64470035	9.932097529	0.406220566
20160322_MKY0532_03	46.69	234.7784091	216.3130525	206.500744	28.27766504	9.812308474	0.405866168
20160322_MKY0532_03	46.893	233.2727273	216.2789912	206.5340402	26.73868709	9.744950981	0.383604033
20160322_MKY0532_03	47.096	233.9261364	216.3107124	206.499256	27.42688041	9.811456476	0.391918574
20160322_MKY0532_03	47.299	234.6079545	216.350234	206.5545015	28.05345306	9.795732521	0.402960577
20160322_MKY0532_03	47.502	234.8295455	216.3447738	206.3491443	28.48040111	9.995629446	0.400612039
20160322_MKY0532_03	47.705	235.2102273	216.4227769	206.4032738	28.80695346	10.0195031	0.404774328
20160322_MKY0532_03	47.908	234.6647727	216.2935517	206.4562872	28.20848553	9.83726454	0.403552405
20160322_MKY0532_03	48.111	234.9545455	216.3770151	206.3493304	28.6052151	10.02768472	0.401150612
20160322_MKY0532_03	48.314	234.9829545	216.3523141	206.5855655	28.39738907	9.766748617	0.410012159
20160322_MKY0532_03	48.517	234.9147727	216.1669267	206.4800967	28.434676	9.686829951	0.414502665
20160322_MKY0532_03	48.72	234.8181818	216.3140926	206.4600074	28.35817438	9.854085124	0.405213246
20160322_MKY0532_03	48.923	235.4715909	216.3484139	206.4317336	29.03985728	9.916680306	0.413371791
20160322_MKY0532_03	49.126	234.625	216.2194488	206.3965774	28.22842262	9.822871397	0.404557598
20160322_MKY0532_03	49.329	234.6306818	216.2917317	206.4388021	28.19187973	9.852929586	0.402545107
20160322_MKY0532_03	49.532	234.4602273	216.3478939	206.4627976	27.99742965	9.885096297	0.39786998
20160322_MKY0532_03	49.735	234.1988636	215.9391576	206.4585193	27.74034429	9.480638221	0.412987017
20160322_MKY0532_03	49.938	235.1022727	216.1658866	206.5133929	28.58887987	9.652493778	0.418764131
20160322_MKY0532_03	50.141	234.4431818	215.9765991	206.5364583	27.90672348	9.440140731	0.417854943
20160322_MKY0532_03	50.344	234.375	216.1315653	206.3798363	27.99516369	9.751728953	0.404080963
20160322_MKY0532_03	50.547	235.0681818	216.0278211	206.484003	28.58417884	9.543818137	0.424125137
20160322_MKY0532_03	50.75	234.5681818	216.0782631	206.4484747	28.11970712	9.629788429	0.412031338
20160322_MKY0532_03	50.953	235.4545455	216.0878835	206.4955357	28.95900974	9.592347801	0.427984296
20160322_MKY0532_03	51.156	235.4090909	216.0577223	206.4622396	28.94685133	9.595482726	0.42762079
20160322_MKY0532_03	51.359	235.0795455	216.050182	206.5221354	28.55741004	9.52804659	0.424471661
20160322_MKY0532_03	51.562	235.6136364	216.1544462	206.3865327	29.22710363	9.76791344	0.423658584
20160322_MKY0532_03	51.765	235.1875	216.0481019	206.4268973	28.76060268	9.621204603	0.423197082
20160322_MKY0532_03	51.968	235.5965909	216.1547062	206.5100446	29.08654627	9.644661545	0.427475886
20160322_MKY0532_03	52.171	235.9886364	216.1214249	206.4905134	29.49812297	9.630911464	0.435064138
20160322_MKY0532_03	52.374	235.6761364	215.924597	206.484003	29.19213339	9.440594008	0.439796007
20160322_MKY0532_03	52.577	235.9431818	216.0223609	206.453125	29.49005682	9.569235894	0.43811259
20160322_MKY0532_03	52.78	236.5397727	216.1055642	206.5504092	29.9893635	9.555154997	0.447274603
20160322_MKY0532_03	52.983	235.6704545	216.0171607	206.4293155	29.24113907	9.58784521	0.432959738
20160322_MKY0532_03	53.186	235.5625	215.9724389	206.3324033	29.23009673	9.640035624	0.430111454
20160322_MKY0532_03	53.389	235.5681818	215.9383775	206.3982515	29.16993033	9.540126047	0.434216502
20160322_MKY0532_03	53.592	236.2272727	215.8684347	206.4821429	29.74512987	9.38629188	0.452185535
20160322_MKY0532_03	53.795	235.9829545	215.9370775	206.4441964	29.53875812	9.492881054	0.442938747
20160322_MKY0532_03	53.998	236.3465909	215.9388976	206.3831845	29.96340639	9.555713032	0.446806847
20160322_MKY0532_03	54.201	236.6363636	216.0977639	206.4631696	30.17319399	9.634594268	0.446178034
20160322_MKY0532_03	54.404	236.3920455	215.8835153	206.4490327	29.94301272	9.434482603	0.452957803
20160322_MKY0532_03	54.607	235.7386364	215.6892876	206.4754464	29.26318994	9.213841143	0.453315757
20160322_MKY0532_03	54.81	236.6079545	215.8936557	206.2940848	30.31386972	9.599570925	0.450385126
20160322_MKY0532_03	55.013	236.5965909	215.9105564	206.469122	30.12746889	9.441434398	0.455732379
20160322_MKY0532_03	55.216	236.1704545	216.0236609	206.405506	29.76494859	9.618154994	0.440194543
20160322_MKY0532_03	55.419	236.2045455	215.8710348	206.4760045	29.72854099	9.395030377	0.451425228
20160322_MKY0532_03	55.622	236.7727273	215.800572	206.3469122	30.42581507	9.453659821	0.460157546
20160322_MKY0532_03	55.825	236.1363636	215.799532	206.4438244	29.69253923	9.355707576	0.452949896
20160322_MKY0532_03	56.028	236.7386364	215.7379095	206.3686756	30.36996077	9.369233921	0.463874124
20160322_MKY0532_03	56.231	236.9318182	215.874935	206.4170387	30.51477949	9.457896307	0.461442358
20160322_MKY0532_03	56.434	237.0625	215.8694748	206.3184524	30.74404762	9.551022398	0.460239953
20160322_MKY0532_03	56.637	237.125	215.8580343	206.3182664	30.80673363	9.539767952	0.461912526
20160322_MKY0532_03	56.84	237.9261364	215.8192928	206.3524926	31.5736438	9.466800212	0.47899571
20160322_MKY0532_03	57.043	236.8295455	215.7293292	206.3833705	30.44617492	9.345958637	0.466491797
20160322_MKY0532_03	57.246	237.125	215.7771711	206.500186	30.62481399	9.276985075	0.473505144
20160322_MKY0532_03	57.449	236.5170455	215.8148726	206.4635417	30.05350379	9.351330928	0.459416229
20160322_MKY0532_03	57.652	237.7556818	215.6840874	206.4109003	31.34478152	9.273187065	0.486247511
20160322_MKY0532_03	57.855	237.7102273	215.8200728	206.2669271	31.44330019	9.55314572	0.471931989
20160322_MKY0532_03	58.058	237.6363636	215.8445138	206.3783482	31.25801542	9.466165567	0.473653167
20160322_MKY0532_03	58.261	237.4772727	215.8026521	206.4765625	31.00071023	9.326089606	0.477203127
20160322_MKY0532_03	58.464	238.1306818	215.9027561	206.4758185	31.65486337	9.426937658	0.482660545
20160322_MKY0532_03	58.667	237.3352273	215.7802912	206.4081101	30.92711715	9.372181093	0.473299391
20160322_MKY0532_03	58.87	238.4943182	215.7186687	206.2912946	32.20302354	9.427374104	0.492015084
20160322_MKY0532_03	59.073	236.9204545	215.7106084	206.4585193	30.4619352	9.252089079	0.472098238
20160322_MKY0532_03	59.276	237.0454545	215.8364535	206.4122024	30.63325216	9.424251077	0.46532829
20160322_MKY0532_03	59.479	237.9715909	215.9552782	206.468936	31.5026549	9.486342199	0.476680257
20160322_MKY0532_03	59.682	237.7102273	215.7870515	206.343006	31.36722132	9.44404553	0.476766123
20160322_MKY0532_03	59.885	237.3295455	215.8042122	206.4879092	30.84163623	9.316302942	0.475012036
20160322_MKY0532_03	60.088	237.1761364	215.7836713	206.3632813	30.81285511	9.420390097	0.468618673
20160322_MKY0532_03	60.291	237.6193182	215.7303692	206.4244792	31.19483902	9.305890048	0.481732169
20160322_MKY0532_03	60.494	237.6647727	215.699168	206.3456101	31.31916261	9.353557848	0.481120508
20160322_MKY0532_03	60.697	237.5852273	215.7805512	206.2942708	31.29095644	9.486280389	0.473083851
20160322_MKY0532_03	60.9	237.7897727	215.7285491	206.3100818	31.47969088	9.418467297	0.480147465
20160322_MKY0532_03	61.103	236.9829545	215.6825273	206.406808	30.57614651	9.275719265	0.472731446
20160322_MKY0532_03	61.306	238.0113636	215.7415497	206.3919271	31.61943655	9.349622579	0.486528593
20160322_MKY0532_03	61.509	237.7159091	215.6482059	206.4702381	31.245671	9.177967833	0.490162493
20160322_MKY0532_03	61.712	237.9488636	215.7615705	206.3989955	31.5498681	9.362574927	0.48457525
20160322_MKY0532_03	61.915	237.7613636	215.6734269	206.3178943	31.44346929	9.355532592	0.483149854
20160322_MKY0532_03	62.118	237.9204545	215.5709828	206.452381	31.46807359	9.118601887	0.497672274
20160322_MKY0532_03	62.321	238.1363636	215.6924077	206.4564732	31.67989042	9.235934482	0.494299721
20160322_MKY0532_03	62.524	238.4886364	215.7480499	206.4547991	32.03383726	9.293250815	0.497030971
20160322_MKY0532_03	62.727	238.0909091	215.5119605	206.3095238	31.78138528	9.202436668	0.498092976
20160322_MKY0532_03	62.93	238.3352273	215.6331253	206.4481027	31.88712459	9.185022646	0.501006257
20160322_MKY0532_03	63.133	237.4602273	215.4404576	206.4492188	31.01100852	8.991238868	0.497357616
20160322_MKY0532_03	63.336	237.6818182	215.5184607	206.3683036	31.31351461	9.150157167	0.493027688
20160322_MKY0532_03	63.539	237.5454545	215.6094644	206.4395461	31.10590841	9.169918248	0.48818594
20160322_MKY0532_03	63.742	238.1875	215.5538222	206.3606771	31.82682292	9.19314507	0.499453345
20160322_MKY0532_03	63.945	238.1193182	215.3822153	206.3472842	31.77203396	9.034931063	0.508254647
20160322_MKY0532_03	64.148	239.5284091	215.5353614	206.3647693	33.16363975	9.170592069	0.524341654
20160322_MKY0532_03	64.351	239.1193182	215.4472179	206.4045759	32.71474229	9.042641996	0.52458799
20160322_MKY0532_03	64.554	238.8409091	215.4932397	206.3350074	32.50590165	9.15823229	0.513543576
20160322_MKY0532_03	64.757	238.9375	215.3577743	206.4559152	32.48158482	8.901859132	0.529592548
20160322_MKY0532_03	64.96	238.1193182	215.3031721	206.3316592	31.78765896	8.971512901	0.512545519
20160322_MKY0532_03	65.163	238.5284091	215.3179927	206.3869048	32.14150433	8.931087958	0.521523705
20160322_MKY0532_03	65.366	238.25	215.3978159	206.3880208	31.86197917	9.00979508	0.511447632
20160322_MKY0532_03	65.569	238.2386364	215.3460738	206.3617932	31.87684321	8.984280688	0.513334564
20160322_MKY0532_03	65.772	237.9886364	215.4326573	206.3236607	31.66497565	9.108996592	0.501746259
20160322_MKY0532_03	65.975	237.6647727	215.4521581	206.4419643	31.22280844	9.0101938	0.499979093
20160322_MKY0532_03	66.178	238.2556818	215.4589184	206.4161086	31.83957319	9.042809726	0.508965224
20160322_MKY0532_03	66.381	239.1136364	215.5226209	206.4079241	32.70571226	9.114696798	0.519814605
20160322_MKY0532_03	66.584	239.1931818	215.3530941	206.3054315	32.88775027	9.047662576	0.527348742
20160322_MKY0532_03	66.787	238.8068182	215.2470099	206.3638393	32.4429789	8.883170594	0.530129807
20160322_MKY0532_03	66.99	238.4772727	215.2613105	206.344494	32.13277868	8.916816404	0.522295013
20160322_MKY0532_03	67.193	239.2329545	215.3710348	206.2914807	32.94147389	9.079554186	0.52624365
20160322_MKY0532_03	67.396	239.2613636	215.224649	206.3178943	32.94346929	8.906754641	0.537634339
20160322_MKY0532_03	67.599	239.5568182	215.1835673	206.375	33.18181818	8.808567343	0.548649971
20160322_MKY0532_03	67.802	238.3693182	215.1911076	206.374256	31.99506223	8.816851692	0.526366189
20160322_MKY0532_03	68.005	239.5795455	215.2766511	206.3216146	33.25793087	8.955036483	0.540082052
20160322_MKY0532_03	68.208	238.1931818	215.198908	206.3465402	31.84664164	8.852367777	0.52131302
20160322_MKY0532_03	68.411	238.625	215.0928237	206.3617932	32.26320685	8.731030558	0.537074326
20160322_MKY0532_03	68.614	239	215.1612064	206.4203869	32.5796131	8.740819543	0.542246063
20160322_MKY0532_03	68.817	239.3181818	215.2709308	206.3164063	33.00177557	8.954524587	0.535501752
20160322_MKY0532_03	69.02	238.7556818	215.0215809	206.3723958	32.38328598	8.64918503	0.544954538
20160322_MKY0532_03	69.223	238.8636364	215.1879875	206.2678571	32.59577922	8.920130377	0.530452
20160322_MKY0532_03	69.426	239.8068182	215.299012	206.3833705	33.42344765	8.915641424	0.545723974
20160322_MKY0532_03	69.629	239.2784091	215.2527301	206.3645833	32.91382576	8.888146776	0.538345451
20160322_MKY0532_03	69.832	238.7045455	215.1544462	206.3407738	32.36377164	8.813672368	0.533325671
20160322_MKY0532_03	70.035	239.5625	215.3484139	206.3828125	33.1796875	8.965601437	0.5379683
20160322_MKY0532_03	70.238	239.1931818	215.1929277	206.4146205	32.77856128	8.778307181	0.543334319
20160322_MKY0532_03	70.441	239.4886364	215.2171087	206.3878348	33.10080154	8.829273863	0.545744681
20160322_MKY0532_03	70.644	240.2443182	215.1861674	206.3939732	33.85034497	8.792194233	0.562047212
20160322_MKY0532_03	70.847	239.9772727	215.1016641	206.3971354	33.58013731	8.70452865	0.563294581
20160322_MKY0532_03	71.05	240.2329545	215.2410296	206.3158482	33.91710633	8.925181427	0.553999904
20160322_MKY0532_03	71.253	239.2613636	215.1417057	206.3007813	32.96058239	8.840924418	0.542389275
20160322_MKY0532_03	71.456	238.2556818	215.0956838	206.3697917	31.88589015	8.72589216	0.530450017
20160322_MKY0532_03	71.659	239.2045455	215.0215809	206.4477307	32.7568148	8.573850208	0.557289107
20160322_MKY0532_03	71.862	238.6988636	215.0465419	206.4231771	32.27568655	8.623364779	0.544750147
20160322_MKY0532_03	72.065	238.8068182	215.0444618	206.4469866	32.35983157	8.597475171	0.548147059
20160322_MKY0532_03	72.268	238.7613636	215.0176807	206.421875	32.33948864	8.595805707	0.547883216
20160322_MKY0532_03	72.471	239	215.0018201	206.3392857	32.66071429	8.662534359	0.549190032
20160322_MKY0532_03	72.674	239.4659091	214.9199168	206.3033854	33.16252367	8.61653138	0.561831705
20160322_MKY0532_03	72.877	238.125	214.798752	206.3125	31.8125	8.48625195	0.545700617
20160322_MKY0532_03	73.08	240.1193182	215.24987	206.3662574	33.75306074	8.883612555	0.55388955
20160322_MKY0532_03	73.283	239.1988636	214.8663547	206.313058	32.8858056	8.553296618	0.561202812
20160322_MKY0532_03	73.486	240.0227273	215.1398856	206.4507068	33.57202043	8.68917875	0.564243234
20160322_MKY0532_03	73.689	239.2954545	214.9604784	206.3058036	32.98965097	8.654674848	0.555873336
20160322_MKY0532_03	73.892	238.3579545	214.773791	206.4049479	31.95300663	8.368843035	0.556892647
20160322_MKY0532_03	74.095	238.6136364	214.8946958	206.2533482	32.36028815	8.641347574	0.545073007
20160322_MKY0532_03	74.298	239.2840909	214.9799792	206.2637649	33.02032603	8.716214318	0.552099732
20160322_MKY0532_03	74.501	237.9545455	214.8790952	206.2633929	31.6911526	8.615702307	0.534342827
20160322_MKY0532_03	74.704	238.5511364	215.0273011	206.3608631	32.19027327	8.666437997	0.540159531
20160322_MKY0532_03	74.907	238.8863636	214.9810192	206.3857887	32.50057495	8.595230551	0.550947045
20160322_MKY0532_03	75.11	237.9488636	214.8671347	206.391369	31.55749459	8.475765637	0.541595458
20160322_MKY0532_03	75.313	238.6761364	214.8840354	206.3193824	32.35675392	8.564652921	0.550415909
20160322_MKY0532_03	75.516	239	214.9726989	206.3260789	32.67392113	8.646620039	0.550555835
20160322_MKY0532_03	75.719	238.6534091	214.9700988	206.3789063	32.27450284	8.591192554	0.546988891
20160322_MKY0532_03	75.922	239.4545455	215.0078003	206.3976935	33.056852	8.61010686	0.560315168
20160322_MKY0532_03	76.125	240.3465909	214.9882995	206.2866443	34.05994656	8.701655187	0.572394857
20160322_MKY0532_03	76.328	240.25	215.0834633	206.3201265	33.92987351	8.763336851	0.565556281
20160322_MKY0532_03	76.531	240.1875	215.024961	206.2983631	33.8891369	8.726597903	0.567432695
20160322_MKY0532_03	76.734	239.3068182	214.8627145	206.358631	32.94818723	8.504083557	0.565975306
20160322_MKY0532_03	76.937	238.3863636	214.826053	206.3111979	32.07516572	8.514855125	0.548645417
20160322_MKY0532_03	77.14	238.7443182	214.800312	206.4084821	32.33583604	8.391829869	0.56256453
20160322_MKY0532_03	77.343	239.4886364	215.0062403	206.3154762	33.17316017	8.69076406	0.556726145
20160322_MKY0532_03	77.546	238.8011364	214.7644306	206.4088542	32.3922822	8.35557641	0.566351203
20160322_MKY0532_03	77.749	238.6136364	214.7293292	206.2929688	32.32066761	8.436360423	0.558993549
20160322_MKY0532_03	77.952	239.0454545	214.8660946	206.235119	32.8103355	8.630975596	0.554210316
20160322_MKY0532_03	78.155	238.4715909	214.9017161	206.2952009	32.17639002	8.606515176	0.544071057
20160322_MKY0532_03	78.358	239.0965909	214.8655746	206.3400298	32.75656115	8.525544861	0.560776251
20160322_MKY0532_04	-2.233	365.5127563	254.8757222	208.1919689	157.3207875	46.68375338	1.00197233
20160322_MKY0532_04	-2.03	359.6047668	253.0325664	208.128867	151.4758998	44.90369941	1.003930702
20160322_MKY0532_04	-1.827	356.5476685	252.2009665	207.8658062	148.6818623	44.3351603	0.992628555
20160322_MKY0532_04	-1.624	355.3841553	251.7217145	207.8375333	147.546622	43.88418117	0.997543775
20160322_MKY0532_04	-1.421	355.834259	251.7104738	207.7629584	148.0713006	43.94751538	1.001600565
20160322_MKY0532_04	-1.218	355.9362488	251.730749	207.8111043	148.1251445	43.91964475	1.003524497
20160322_MKY0532_04	-1.015	355.1940002	251.5325139	207.6953493	147.4986509	43.83716461	0.998980261
20160322_MKY0532_04	-0.812	353.5354919	251.1046328	207.7844704	145.7510215	43.32016244	0.998873652
20160322_MKY0532_04	-0.609	354.1940002	251.1775397	207.6713788	146.5226214	43.50616084	1.000790355
20160322_MKY0532_04	0	235.2466736	224.611829	207.4019668	27.84470677	17.20986216	0
20160322_MKY0532_04	0.203	236.4717255	224.8206744	207.5023561	28.96936939	17.31831837	0.031345362
20160322_MKY0532_04	0.406	237.334259	225.0507406	207.5148535	29.81940552	17.53588711	0.047198753
20160322_MKY0532_04	0.609	237.5698395	225.0710159	207.4415079	30.12833159	17.62950798	0.052055932
20160322_MKY0532_04	0.812	237.9983368	225.1210211	207.5119852	30.48635154	17.60903587	0.064820073
20160322_MKY0532_04	1.015	238.1923523	225.0344574	207.3876255	30.80472681	17.64683191	0.073017496
20160322_MKY0532_04	1.218	238.9168549	225.1948734	207.4171276	31.49972722	17.77774577	0.088023968
20160322_MKY0532_04	1.421	238.8475647	225.2006513	207.3859865	31.46157822	17.81466485	0.084699201
20160322_MKY0532_04	1.624	238.8641968	225.1440277	207.4245032	31.4396936	17.71952456	0.089415903
20160322_MKY0532_04	1.827	238.77771	225.0577792	207.4173325	31.36037745	17.64044666	0.09139327
20160322_MKY0532_04	2.03	239.0072021	225.0649228	207.3677525	31.63944964	17.69717028	0.097153085
20160322_MKY0532_04	2.233	239.0188446	224.9943271	207.2655194	31.75332524	17.72880777	0.099001943
20160322_MKY0532_04	2.436	239.2771606	225.0459082	207.3341528	31.94300781	17.71175535	0.10611296
20160322_MKY0532_04	2.639	239.3459015	224.9908604	207.37185	31.97405146	17.61901035	0.11255002
20160322_MKY0532_04	2.842	239.7150726	225.0358231	207.366933	32.34813963	17.66889008	0.121728639
20160322_MKY0532_04	3.045	239.6280518	224.9368631	207.2950215	32.33303025	17.6418416	0.122844164
20160322_MKY0532_04	3.248	240.3957825	225.1110411	207.3700061	33.02577632	17.74103493	0.139315433
20160322_MKY0532_04	3.451	240.7705078	225.2360542	207.3210408	33.44946704	17.91501344	0.142502086
20160322_MKY0532_04	3.654	240.4345856	225.1297405	207.2472854	33.18730018	17.88245513	0.136061733
20160322_MKY0532_04	3.857	240.5532227	225.0350877	207.2581438	33.29507883	17.7769439	0.145828745
20160322_MKY0532_04	4.06	240.1978912	224.9825612	207.2810899	32.91680129	17.70147125	0.138174119
20160322_MKY0532_04	4.263	240.1735077	224.9133312	207.2479	32.92560767	17.66543121	0.140628909
20160322_MKY0532_04	4.466	240.3159637	224.930665	207.1833641	33.13259968	17.74730092	0.142381947
20160322_MKY0532_04	4.669	240.5199585	224.9052421	207.1987298	33.32122873	17.70651238	0.150934109
20160322_MKY0532_04	4.872	240.3054352	224.8728858	207.2288465	33.07658863	17.64403926	0.146815152
20160322_MKY0532_04	5.075	240.7161865	224.8889589	207.2286417	33.48754485	17.66031725	0.159135302
20160322_MKY0532_04	5.278	240.6990051	224.8412648	207.2358123	33.46319279	17.6054525	0.161723778
20160322_MKY0532_04	5.481	240.9029999	224.839584	207.115755	33.78724491	17.72382902	0.164919925
20160322_MKY0532_04	5.684	240.9645233	224.8424204	207.2075394	33.75698388	17.63488098	0.16943758
20160322_MKY0532_04	5.887	241.1707306	224.9618657	207.2042614	33.96646917	17.75760432	0.168618448
20160322_MKY0532_04	6.09	241.2078705	224.9638618	207.2220856	33.98578484	17.74177611	0.170217045
20160322_MKY0532_04	6.293	241.4806061	224.9827713	207.1475108	34.33309532	17.83526054	0.175611667
20160322_MKY0532_04	6.496	241.6213989	225.0388696	207.1907396	34.43065932	17.84813003	0.17794409
20160322_MKY0532_04	6.699	241.5803833	225.035718	207.1067404	34.47364288	17.92897762	0.17434022
20160322_MKY0532_04	6.902	241.624176	224.9053472	207.1485351	34.47564089	17.75681206	0.185066621
20160322_MKY0532_04	7.105	241.7644196	224.8724656	207.2423684	34.52205119	17.63009723	0.194552971
20160322_MKY0532_04	7.308	241.4129639	224.7915747	207.0501946	34.36276924	17.74138011	0.182393945
20160322_MKY0532_04	7.511	241.6834869	224.7925202	207.0842041	34.59928288	17.70831617	0.192100684
20160322_MKY0532_04	7.714	241.7433472	224.817838	207.1216964	34.62165079	17.69614163	0.193592339
20160322_MKY0532_04	7.917	241.7749481	224.78212	207.1679984	34.60694976	17.61412161	0.198325231
20160322_MKY0532_04	8.12	241.834259	224.6228595	207.1995493	34.63470976	17.42331027	0.21154206
20160322_MKY0532_04	8.323	242.1890259	224.7789684	207.3128457	34.87618015	17.46612265	0.216662113
20160322_MKY0532_04	8.526	242.6230621	224.9860279	207.0799017	35.54316048	17.90612629	0.209903281
20160322_MKY0532_04	8.729	242.5920105	224.9462128	207.1628765	35.42913404	17.78333638	0.214074679
20160322_MKY0532_04	8.932	242.625824	224.8049165	207.029707	35.59611695	17.77520946	0.219968224
20160322_MKY0532_04	9.135	242.4966736	224.7720349	207.1960664	35.3006072	17.5759685	0.223335536
20160322_MKY0532_04	9.338	242.3348084	224.7293833	207.0624872	35.27232116	17.66689614	0.216507975
20160322_MKY0532_04	9.541	242.7383575	224.7780229	207.1003893	35.63796828	17.67763364	0.227643904
20160322_MKY0532_04	9.744	242.7422333	224.896943	207.0839992	35.6582341	17.81294378	0.219536441
20160322_MKY0532_04	9.947	242.4445648	224.7204538	207.0964966	35.3480682	17.62395721	0.221747971
20160322_MKY0532_04	10.15	242.4650726	224.6861015	207.0919893	35.37308329	17.59411214	0.224506893
20160322_MKY0532_04	10.353	242.1574249	224.6221242	207.0438435	35.11358145	17.5782807	0.217099555
20160322_MKY0532_04	10.556	242.3226166	224.5226389	206.9893464	35.33327013	17.53329249	0.227196784
20160322_MKY0532_04	10.759	242.4295959	224.5698078	207.1280475	35.30154842	17.44176022	0.232204921
20160322_MKY0532_04	10.962	242.4201813	224.5667612	207.0848187	35.33536259	17.48194253	0.230650548
20160322_MKY0532_04	11.165	242.0094299	224.4536191	207.0870723	34.92235761	17.36654676	0.224730699
20160322_MKY0532_04	11.368	242.4174042	224.4665406	206.9184593	35.49894484	17.54808127	0.231625
20160322_MKY0532_04	11.571	242.3736115	224.4565606	207.0510141	35.32259731	17.40554643	0.235304883
20160322_MKY0532_04	11.774	242.4955597	224.3542389	206.9866831	35.50887664	17.36755583	0.243977832
20160322_MKY0532_04	11.977	242.7117462	224.3486711	206.9618931	35.74985316	17.38677802	0.250611632
20160322_MKY0532_04	12.18	242.7383575	224.3483559	206.9399713	35.79838623	17.4083846	0.250746546
20160322_MKY0532_04	12.383	242.4878082	224.332703	206.9657857	35.52202253	17.36691731	0.244453731
20160322_MKY0532_04	12.586	242.75	224.3395315	207.1175989	35.63240115	17.22193261	0.257967097
20160322_MKY0532_04	12.789	242.2915802	224.2091606	206.917435	35.37414525	17.29172567	0.244649481
20160322_MKY0532_04	12.992	242.5049896	224.1602059	207.076009	35.42898061	17.08419689	0.260697278
20160322_MKY0532_04	13.195	242.9113007	224.3508772	207.0436386	35.86766206	17.30723859	0.259908852
20160322_MKY0532_04	13.398	243.1319275	224.3481458	206.9516493	36.18027824	17.39649656	0.264104928
20160322_MKY0532_04	13.601	243.151886	224.255384	207.0122926	36.13959342	17.24309141	0.273337392
20160322_MKY0532_04	13.804	242.9767151	224.2103162	206.9334153	36.0432998	17.27690093	0.267804142
20160322_MKY0532_04	14.007	243.6008911	224.38607	207.0245851	36.57630599	17.36148484	0.279549239
20160322_MKY0532_04	14.21	243.2466736	224.2289106	206.9651711	36.28150251	17.26373953	0.276604886
20160322_MKY0532_04	14.413	243.2472229	224.2024372	206.9786929	36.26853001	17.22374434	0.278965127
20160322_MKY0532_04	14.616	243.1435699	224.1888854	206.9827904	36.16077953	17.20609497	0.276618943
20160322_MKY0532_04	14.819	243.4301605	224.1180796	206.8526941	36.5774664	17.26538551	0.286294005
20160322_MKY0532_04	15.022	243.5487823	224.2063242	206.9143618	36.63442054	17.29196238	0.286315499
20160322_MKY0532_04	15.225	243.5144196	224.2142032	207.0270436	36.48737592	17.18715953	0.28881078
20160322_MKY0532_04	15.428	242.9434662	223.9994747	206.9094448	36.0340214	17.09002995	0.280539889
20160322_MKY0532_04	15.631	243.1435699	224.0617712	206.9709076	36.17266235	17.09086359	0.2851204
20160322_MKY0532_04	15.834	242.8891296	223.9932766	206.8936693	35.99546031	17.09960728	0.27857479
20160322_MKY0532_04	16.037	243.3165131	224.0439122	206.8746159	36.44189721	17.16929632	0.288559086
20160322_MKY0532_04	16.24	243.2483368	223.8839164	206.862733	36.38560375	17.02118333	0.297230445
20160322_MKY0532_04	16.443	243.2616425	223.8183633	207.0024585	36.25918394	16.81590476	0.307855096
20160322_MKY0532_04	16.646	243.508316	223.9389642	207.0399508	36.46836521	16.89901335	0.308869667
20160322_MKY0532_04	16.849	243.5260468	223.9380187	206.9311616	36.59488511	17.00685705	0.305298059
20160322_MKY0532_04	17.052	243.3137512	223.7575376	206.9180496	36.39570164	16.83948798	0.310764541
20160322_MKY0532_04	17.255	243.3924561	223.8088034	206.9645564	36.42789961	16.844247	0.31150852
20160322_MKY0532_04	17.458	243.4223938	223.8361172	206.9518541	36.47053967	16.88426311	0.310021522
20160322_MKY0532_04	17.661	243.4800415	223.9588192	206.9323909	36.5476506	17.0264283	0.302296921
20160322_MKY0532_04	17.864	243.0282745	223.7990335	206.9196886	36.10858595	16.87934492	0.298117663
20160322_MKY0532_04	18.067	242.8414612	223.7630003	206.9213276	35.92013359	16.84167272	0.294454836
20160322_MKY0532_04	18.27	243.1313782	223.7993487	206.9155911	36.21578711	16.8837576	0.301429176
20160322_MKY0532_04	18.473	243.2012177	223.6639353	206.7113296	36.48988801	16.95260564	0.305694103
20160322_MKY0532_04	18.676	243.0654144	223.6093077	206.8815816	36.18383279	16.72772606	0.311779472
20160322_MKY0532_04	18.879	243.1213989	223.6026894	206.7269002	36.3944987	16.87578913	0.308064853
20160322_MKY0532_04	19.082	243.3131866	223.6879924	206.8471625	36.46602418	16.84082997	0.313054175
20160322_MKY0532_04	19.285	242.8608704	223.5174913	206.7973776	36.06349277	16.72011375	0.308226478
20160322_MKY0532_04	19.488	242.9290466	223.5653955	206.885884	36.04316259	16.67951149	0.310532171
20160322_MKY0532_04	19.691	242.9977875	223.6186574	206.8531039	36.1446836	16.76555355	0.307652781
20160322_MKY0532_04	19.894	243.196228	223.6307385	206.8127433	36.38348474	16.81799523	0.311928765
20160322_MKY0532_04	20.097	242.924057	223.6785377	206.8184798	36.10557719	16.86005784	0.299415158
20160322_MKY0532_04	20.3	242.977829	223.5973317	206.8973571	36.08047188	16.69997455	0.310295535
20160322_MKY0532_04	20.503	243.3131866	223.6201282	206.8770744	36.43611228	16.7430538	0.31926432
20160322_MKY0532_04	20.706	243.1973419	223.6504885	206.8315919	36.36575003	16.81889661	0.311259406
20160322_MKY0532_04	20.909	243.8309326	223.6997584	206.7781192	37.05281338	16.92163914	0.32697236
20160322_MKY0532_04	21.112	243.9800415	223.7689883	206.6978078	37.28223368	17.07118051	0.323688341
20160322_MKY0532_04	21.315	243.4844818	223.6324194	206.7238271	36.76065473	16.90859229	0.318056775
20160322_MKY0532_04	21.518	243.7001038	223.6748608	206.748822	36.9512818	16.92603884	0.323216214
20160322_MKY0532_04	21.721	243.5709534	223.562454	206.8301578	36.74079561	16.73229628	0.330478569
20160322_MKY0532_04	21.924	243.5338135	223.5448051	206.8162262	36.71758729	16.72857894	0.32996419
20160322_MKY0532_04	22.127	243.5975647	223.5500578	206.7533292	36.84423546	16.79672854	0.329183329
20160322_MKY0532_04	22.33	243.6818237	223.5058304	206.8229871	36.85883664	16.68284335	0.338247741
20160322_MKY0532_04	22.533	243.6474457	223.4803026	206.8725671	36.77487858	16.60773546	0.341070982
20160322_MKY0532_04	22.736	243.6407928	223.4877613	206.6926859	36.94810692	16.79507539	0.332843868
20160322_MKY0532_04	22.939	244.2250519	223.5357706	206.7580414	37.46701049	16.77772918	0.351832767
20160322_MKY0532_04	23.142	243.9456787	223.4962706	206.7531244	37.19255435	16.74314626	0.345095892
20160322_MKY0532_04	23.345	243.8885803	223.5599328	206.7627535	37.12582679	16.79717923	0.338737286
20160322_MKY0532_04	23.548	243.9728394	223.6103582	206.846343	37.12649639	16.76401527	0.341260797
20160322_MKY0532_04	23.751	243.9938965	223.5087719	206.7746363	37.21926014	16.73413558	0.346692666
20160322_MKY0532_04	23.954	243.8104248	223.4418531	206.7924606	37.01796424	16.64939257	0.346252483
20160322_MKY0532_04	24.157	243.8181763	223.4625486	206.7914362	37.02674009	16.67111241	0.344896881
20160322_MKY0532_04	24.36	243.9950104	223.3906923	206.7482073	37.24680304	16.64248497	0.354644184
20160322_MKY0532_04	24.563	244.3791504	223.4682215	206.7865192	37.59263124	16.6817023	0.363491349
20160322_MKY0532_04	24.766	244.1984406	223.5193823	206.7353001	37.46314041	16.78408215	0.351217478
20160322_MKY0532_04	24.969	244.191803	223.4826137	206.7596804	37.43212259	16.72293333	0.35482447
20160322_MKY0532_04	25.172	243.991684	223.3954197	206.7037492	37.28793473	16.69167045	0.352281799
20160322_MKY0532_04	25.375	243.624176	223.3286059	206.6754763	36.94869969	16.65312961	0.343588418
20160322_MKY0532_04	25.578	243.9040985	223.376195	206.763573	37.14052547	16.61262194	0.353286328
20160322_MKY0532_04	25.781	243.5837097	223.3404769	206.7170662	36.86664354	16.62341077	0.343033888
20160322_MKY0532_04	25.984	243.388031	223.2412018	206.7932801	36.59475094	16.44792174	0.347112486
20160322_MKY0532_04	26.187	243.7389069	223.3529783	206.8266749	36.912232	16.52630339	0.352064294
20160322_MKY0532_04	26.39	243.468399	223.229751	206.7447244	36.72367461	16.48502658	0.348721174
20160322_MKY0532_04	26.593	243.0820465	223.1649333	206.6996517	36.3823948	16.46528158	0.338394877
20160322_MKY0532_04	26.796	243.3725128	223.2076899	206.7207539	36.65175887	16.48693594	0.346078964
20160322_MKY0532_04	26.999	243.039917	223.106839	206.7891825	36.25073445	16.31765641	0.345213171
20160322_MKY0532_04	27.202	243.2294922	223.0801555	206.8305675	36.39892468	16.24958797	0.355750968
20160322_MKY0532_04	27.405	243.0559845	223.1433974	206.7484122	36.30757229	16.39498521	0.341203235
20160322_MKY0532_04	27.608	242.8913574	223.0064082	206.7506658	36.14069158	16.25574239	0.346180788
20160322_MKY0532_04	27.811	243.3093109	223.0635571	206.7510756	36.55823531	16.3124815	0.356397108
20160322_MKY0532_04	28.014	243.4262695	223.1202857	206.862733	36.56353648	16.2575527	0.360914092
20160322_MKY0532_04	28.217	243.4168549	223.0028364	206.7465683	36.67028653	16.25626811	0.364771294
20160322_MKY0532_04	28.42	243.0665131	222.8908499	206.6998566	36.36665648	16.19099329	0.359247329
20160322_MKY0532_04	28.623	243.0005493	222.990125	206.7277197	36.27282959	16.26240528	0.350306818
20160322_MKY0532_04	28.826	243.3824768	223.0305704	206.7213686	36.66110824	16.30920187	0.360262265
20160322_MKY0532_04	29.029	243.4046631	223.0274188	206.8742061	36.53045698	16.15321274	0.368051207
20160322_MKY0532_04	29.232	243.3392487	223.005883	206.8444991	36.49474958	16.16138389	0.366133687
20160322_MKY0532_04	29.435	243.5803833	223.0708058	206.7521	36.82828332	16.31870578	0.365372415
20160322_MKY0532_04	29.638	243.7965698	223.0101901	206.7500512	37.0465186	16.26013893	0.377697211
20160322_MKY0532_04	29.841	243.9700623	223.0919214	206.8031141	37.16694814	16.2888073	0.379632246
20160322_MKY0532_04	30.044	243.6557617	223.0234268	206.8006556	36.85510612	16.22277123	0.373950632
20160322_MKY0532_04	30.247	243.5798187	222.9492594	206.8410162	36.73880254	16.10824319	0.379059071
20160322_MKY0532_04	30.45	243.5947876	223.0924467	206.8387625	36.75602505	16.25368414	0.367993227
20160322_MKY0532_04	30.653	243.182373	222.8025003	206.6162672	36.56610589	16.18623311	0.366672276
20160322_MKY0532_04	30.856	242.7089844	222.6952411	206.7088711	36.00011324	15.98636996	0.362576611
20160322_MKY0532_04	31.059	242.6480103	222.689148	206.8143823	35.83362796	15.87476572	0.365633057
20160322_MKY0532_04	31.262	243.0171814	222.766362	206.6654374	36.35174399	16.1009246	0.365903524
20160322_MKY0532_04	31.465	243.3331451	222.8398991	206.757017	36.57612814	16.08288214	0.375331216
20160322_MKY0532_04	31.668	243.1912384	222.7746612	206.654579	36.53665942	16.12008222	0.370929441
20160322_MKY0532_04	31.871	242.7705078	222.6571068	206.6377791	36.13272867	16.01932769	0.36466146
20160322_MKY0532_04	32.074	243.3497772	222.7351613	206.7953288	36.5544484	15.93983243	0.386225888
20160322_MKY0532_04	32.277	242.7821503	222.5795777	206.6828519	36.09929839	15.89672581	0.373407621
20160322_MKY0532_04	32.48	243.1474457	222.6409287	206.6904323	36.45701339	15.95049638	0.381855469
20160322_MKY0532_04	32.683	243.3680725	222.6221242	206.5974186	36.77065395	16.02470561	0.386995629
20160322_MKY0532_04	32.886	243.6058807	222.6170816	206.7457488	36.86013192	15.8713328	0.402901491
20160322_MKY0532_04	33.089	243.1391296	222.5233743	206.7832411	36.3558885	15.74013316	0.395651272
20160322_MKY0532_04	33.292	243.2189636	222.5943902	206.7328416	36.48612199	15.86154854	0.390235366
20160322_MKY0532_04	33.495	243.3835907	222.5687572	206.7578365	36.62575419	15.81092071	0.39949864
20160322_MKY0532_04	33.698	243.3431244	222.5065658	206.7643925	36.57873185	15.74217327	0.403575935
20160322_MKY0532_04	33.901	243.4994507	222.6490178	206.7988117	36.70063896	15.85020603	0.398917029
20160322_MKY0532_04	34.104	244.0798187	222.788213	206.6500717	37.42974702	16.13814134	0.401128498
20160322_MKY0532_04	34.307	243.834259	222.6513289	206.7584511	37.0758079	15.89287778	0.408862068
20160322_MKY0532_04	34.51	243.7073212	222.6339952	206.6683057	37.03901549	15.96568949	0.401459557
20160322_MKY0532_04	34.713	242.8486633	222.2863746	206.6295841	36.21907923	15.65679052	0.397685586
20160322_MKY0532_04	34.916	243.4550934	222.4687467	206.6597009	36.7953925	15.80904584	0.405792615
20160322_MKY0532_04	35.119	243.6008911	222.6140351	206.761934	36.83895708	15.85210106	0.403748947
20160322_MKY0532_04	35.322	243.8531036	222.534615	206.7582463	37.09485738	15.77636872	0.419405632
20160322_MKY0532_04	35.525	243.8409119	222.6126694	206.5789797	37.26193215	16.03368968	0.403783842
20160322_MKY0532_04	35.728	243.6230621	222.4876563	206.6064331	37.01662903	15.88122316	0.407710042
20160322_MKY0532_04	35.931	243.4761658	222.500998	206.6377791	36.83838663	15.86321886	0.402796896
20160322_MKY0532_04	36.134	243.3835907	222.4091816	206.737144	36.64644667	15.67203761	0.41199411
20160322_MKY0532_04	36.337	243.5526581	222.4263053	206.5806187	36.97203935	15.84568656	0.409090238
20160322_MKY0532_04	36.54	243.3115234	222.4953251	206.8020897	36.5094337	15.6932354	0.40519454
20160322_MKY0532_04	36.743	243.4179535	222.5265259	206.7115345	36.70641897	15.81499137	0.402074683
20160322_MKY0532_04	36.946	243.5388031	222.5476416	206.6246671	36.91413603	15.92297448	0.400533453
20160322_MKY0532_04	37.149	243.446228	222.5106629	206.7797582	36.66646978	15.73090464	0.40771766
20160322_MKY0532_04	37.352	243.7317047	222.5194873	206.6939152	37.03778953	15.82557216	0.413162388
20160322_MKY0532_04	37.555	243.9351501	222.5761109	206.7897972	37.14535297	15.78631376	0.420387848
20160322_MKY0532_04	37.758	244.2023315	222.6750709	206.795124	37.40720759	15.87994696	0.421883706
20160322_MKY0532_04	37.961	244.3314819	222.621809	206.6691252	37.66235676	15.95268384	0.424888269
20160322_MKY0532_04	38.164	243.9074249	222.4421683	206.8920303	37.0153946	15.55013797	0.43604685
20160322_MKY0532_04	38.367	244.1868134	222.6046854	206.733866	37.45294734	15.87081936	0.424306757
20160322_MKY0532_04	38.57	244.0326996	222.5581469	206.6451547	37.3875449	15.91299218	0.418379399
20160322_MKY0532_04	38.773	244.0942383	222.4940645	206.6912518	37.40298649	15.80281271	0.428306717
20160322_MKY0532_04	38.976	244.3492279	222.6342053	206.7779144	37.57131354	15.85629091	0.429812636
20160322_MKY0532_04	39.179	243.7561035	222.4581364	206.763573	36.99253048	15.69456332	0.422686018
20160322_MKY0532_04	39.382	243.9927979	222.5123437	206.8326163	37.16018159	15.67972747	0.430076466
20160322_MKY0532_04	39.585	244.2660828	222.6203383	206.836304	37.42977873	15.78403424	0.430887923
20160322_MKY0532_04	39.788	244.062088	222.5304129	206.6715837	37.39050432	15.85882917	0.423075298
20160322_MKY0532_04	39.991	243.3625336	222.2647337	206.6445401	36.71799352	15.62019364	0.419052291
20160322_MKY0532_04	40.194	243.6707306	222.3540288	206.857816	36.81291457	15.49621276	0.433311455
20160322_MKY0532_04	40.397	244.0393524	222.4053997	206.7293587	37.30999368	15.67604099	0.435860815
20160322_MKY0532_04	40.6	244.017746	222.3848093	206.7066175	37.31112848	15.67819183	0.435715474
20160322_MKY0532_04	40.803	243.7283783	222.4180061	206.7260807	37.00229758	15.69192537	0.423268602
20160322_MKY0532_04	41.006	244.1191864	222.4253598	206.6709691	37.44821734	15.75439074	0.434109122
20160322_MKY0532_04	41.209	244.0809326	222.3421578	206.7297685	37.35116413	15.6123893	0.442918505
20160322_MKY0532_04	41.412	244.7732849	222.4625486	206.5662774	38.20700751	15.89627118	0.449275133
20160322_MKY0532_04	41.615	244.562088	222.4410127	206.7244417	37.8376463	15.716571	0.45155133
20160322_MKY0532_04	41.818	244.7095337	222.4518332	206.676091	38.03344273	15.77574221	0.453485101
20160322_MKY0532_04	42.021	244.5133057	222.3303918	206.6920713	37.82123437	15.63832055	0.457840677
20160322_MKY0532_04	42.224	244.4212799	222.3766152	206.7076419	37.71363803	15.66897331	0.45120762
20160322_MKY0532_04	42.427	244.7256165	222.4186364	206.6703544	38.05526202	15.74828197	0.456681707
20160322_MKY0532_04	42.63	244.5171814	222.4938544	206.7498463	37.76733505	15.74400805	0.446597759
20160322_MKY0532_04	42.833	244.9312592	222.4789369	206.7135833	38.21767587	15.76535358	0.461076984
20160322_MKY0532_04	43.036	244.7494507	222.3450993	206.7172711	38.03217963	15.62782822	0.466488989
20160322_MKY0532_04	43.239	244.4589844	222.3689463	206.6941201	37.76486432	15.67482626	0.452562664
20160322_MKY0532_04	43.442	244.660202	222.3763	206.6117599	38.04844214	15.76454015	0.455009015
20160322_MKY0532_04	43.645	244.2693939	222.3260847	206.5648433	37.70455065	15.7612414	0.442819515
20160322_MKY0532_04	43.848	244.0426788	222.2595861	206.6787544	37.36392448	15.58083174	0.446158134
20160322_MKY0532_04	44.051	244.3098602	222.2962496	206.6805982	37.62926199	15.61565137	0.452817783
20160322_MKY0532_04	44.254	244.3503265	222.1720769	206.6054087	37.74491781	15.56666817	0.461403463
20160322_MKY0532_04	44.457	243.7328186	222.0875092	206.5748822	37.15793641	15.512627	0.444593912
20160322_MKY0532_04	44.66	244.6840363	222.2660994	206.6865396	37.99749661	15.57955974	0.46952791
20160322_MKY0532_04	44.863	244.5914612	222.2312218	206.5910674	38.00039378	15.64015436	0.464229784
20160322_MKY0532_04	45.066	244.8021088	222.2727177	206.6750666	38.12704218	15.59765114	0.472660024
20160322_MKY0532_04	45.269	244.4429016	222.2189306	206.8531039	37.58979774	15.36582669	0.473755374
20160322_MKY0532_04	45.472	244.4223938	222.2484505	206.6588814	37.76351242	15.58956909	0.460048529
20160322_MKY0532_04	45.675	244.0914612	222.0862486	206.5970088	37.49445237	15.48923975	0.459087551
20160322_MKY0532_04	45.878	244.4002228	222.1417166	206.6349109	37.7653119	15.50680569	0.467508939
20160322_MKY0532_04	46.081	244.3209534	222.1866793	206.6701496	37.65080381	15.51652971	0.462415516
20160322_MKY0532_04	46.284	244.5338135	222.2209266	206.6625691	37.87124433	15.55835742	0.466787845
20160322_MKY0532_04	46.487	244.1995544	222.063347	206.6170867	37.58246778	15.44626033	0.46619853
20160322_MKY0532_04	46.69	244.129715	222.0497951	206.6640033	37.46571169	15.38579187	0.467327437
20160322_MKY0532_04	46.893	243.9440155	221.978254	206.5716042	37.37241132	15.40664984	0.461978625
20160322_MKY0532_04	47.096	243.6358032	221.8561824	206.6963737	36.93942953	15.15980868	0.468233078
20160322_MKY0532_04	47.299	243.6103058	221.7963021	206.5429215	37.06738425	15.2533806	0.46448184
20160322_MKY0532_04	47.502	243.9700623	221.8447316	206.6088916	37.36117064	15.23583997	0.477109791
20160322_MKY0532_04	47.705	244.1474457	221.936653	206.6498668	37.49757885	15.28678618	0.477539223
20160322_MKY0532_04	47.908	244.536026	222.0804706	206.6488425	37.88718355	15.43162819	0.478811
20160322_MKY0532_04	48.111	244.4495544	221.9860279	206.6566277	37.7929267	15.3294002	0.484658278
20160322_MKY0532_04	48.314	244.1019897	221.9911755	206.6605204	37.44146936	15.33065516	0.471431742
20160322_MKY0532_04	48.517	244.3802643	221.982141	206.6285597	37.75170456	15.35358126	0.48090214
20160322_MKY0532_04	48.72	243.7716217	221.8879084	206.7264905	37.04513123	15.16141792	0.472072383
20160322_MKY0532_04	48.923	243.1845856	221.6496481	206.6211842	36.56340139	15.02846389	0.466102584
20160322_MKY0532_04	49.126	243.7062073	221.7324299	206.6726081	37.0335992	15.0598218	0.481061505
20160322_MKY0532_04	49.329	244.0814819	221.8943166	206.5898381	37.49164379	15.30447848	0.475695699
20160322_MKY0532_04	49.532	244.2910156	221.8952621	206.6863348	37.60468086	15.20892734	0.488748291
20160322_MKY0532_04	49.735	244.0587616	221.869314	206.6187257	37.44003593	15.25058833	0.478711059
20160322_MKY0532_04	49.938	243.4118652	221.7289631	206.5968039	36.8150613	15.13215919	0.466078967
20160322_MKY0532_04	50.141	243.7217255	221.7356865	206.5488629	37.17286253	15.18682358	0.47454486
20160322_MKY0532_04	50.344	243.2688446	221.6504885	206.6846958	36.58414885	14.96579274	0.472722205
20160322_MKY0532_04	50.547	242.9412384	221.588087	206.5164925	36.42474588	15.07159446	0.456859273
20160322_MKY0532_04	50.75	242.8586426	221.528627	206.6570375	36.20160509	14.87158947	0.466866727
20160322_MKY0532_04	50.953	243.2594299	221.546486	206.5425118	36.71691815	15.00397419	0.474225322
20160322_MKY0532_04	51.156	244.0665131	221.7423049	206.7250563	37.34145672	15.01724852	0.496772852
20160322_MKY0532_04	51.359	243.9329224	221.6684526	206.664413	37.26850933	15.00403954	0.495244269
20160322_MKY0532_04	51.562	243.9944611	221.7675176	206.5986478	37.39581324	15.16886978	0.484607621
20160322_MKY0532_04	51.765	244.486145	221.8049165	206.5257119	37.96043308	15.27920454	0.495560253
20160322_MKY0532_04	51.968	244.0554352	221.7221347	206.657857	37.39757818	15.06427768	0.494463846
20160322_MKY0532_04	52.171	244.0715027	221.6859964	206.7111248	37.36037792	14.97487166	0.501519815
20160322_MKY0532_04	52.374	244.0365906	221.7553314	206.6031551	37.43343549	15.15217635	0.487580996
20160322_MKY0532_04	52.577	243.8486633	221.6621494	206.5572629	37.29140047	15.10488653	0.486626648
20160322_MKY0532_04	52.78	243.8686218	221.6659313	206.5183364	37.35028542	15.14759489	0.484868935
20160322_MKY0532_04	52.983	244.3065338	221.7719298	206.6240524	37.68248137	15.14787738	0.497384738
20160322_MKY0532_04	53.186	244.558197	221.7809644	206.7017005	37.85649655	15.07926392	0.510458181
20160322_MKY0532_04	53.389	244.5903473	221.8069125	206.5209998	38.0693475	15.2859127	0.49901165
20160322_MKY0532_04	53.592	244.4295959	221.7745562	206.5896333	37.83996268	15.18492288	0.49984509
20160322_MKY0532_04	53.795	244.2438965	221.6749659	206.6539644	37.58993213	15.02100151	0.505878004
20160322_MKY0532_04	53.998	244.651886	221.7612144	206.4863757	38.16551024	15.27483867	0.50364473
20160322_MKY0532_04	54.201	244.1856995	221.6364114	206.5425118	37.64318768	15.09389961	0.500983682
20160322_MKY0532_04	54.404	244.1097565	221.5877718	206.637984	37.47177245	14.94978781	0.508175317
20160322_MKY0532_04	54.607	244.6385803	221.6944007	206.583487	38.05509333	15.11091368	0.514967332
20160322_MKY0532_04	54.81	244.0548706	221.5892426	206.6603155	37.3945551	14.92892706	0.507220289
20160322_MKY0532_04	55.013	244.5587616	221.6003782	206.4765417	38.0822199	15.1238365	0.514762447
20160322_MKY0532_04	55.216	244.2804871	221.6349406	206.4724442	37.80804289	15.16249647	0.50074904
20160322_MKY0532_04	55.419	244.2134094	221.5180166	206.5552141	37.65819533	14.9628025	0.514053935
20160322_MKY0532_04	55.622	244.5903473	221.6143502	206.5439459	38.04640138	15.07040433	0.518508987
20160322_MKY0532_04	55.825	244.6618652	221.6187625	206.6193403	38.04252494	14.99942218	0.525193863
20160322_MKY0532_04	56.028	244.4950104	221.5711734	206.6023356	37.89267479	14.96883786	0.522432275
20160322_MKY0532_04	56.231	244.6662903	221.6332598	206.5763163	38.08997395	15.05694347	0.521454792
20160322_MKY0532_04	56.434	244.7378082	221.5480618	206.5478386	38.18996967	15.00022321	0.530737995
20160322_MKY0532_04	56.637	244.8586426	221.5906083	206.5742676	38.28437501	15.01634069	0.532770671
20160322_MKY0532_04	56.84	244.0598602	221.3616977	206.5609506	37.4989096	14.80074703	0.523658968
20160322_MKY0532_04	57.043	243.9235077	221.3516126	206.710715	37.21279267	14.64089755	0.528302519
20160322_MKY0532_04	57.246	244.0354767	221.47526	206.581848	37.4536287	14.89341202	0.512904788
20160322_MKY0532_04	57.449	244.4944611	221.4843996	206.6027453	37.89171572	14.88165428	0.53087703
20160322_MKY0532_04	57.652	244.22229	221.3081206	206.5922967	37.62999338	14.71582394	0.537115238
20160322_MKY0532_04	57.855	244.468399	221.4343944	206.4853514	37.98304769	14.94904301	0.52780675
20160322_MKY0532_04	58.058	243.9223938	221.3286059	206.5218193	37.4005745	14.80678665	0.519269756
20160322_MKY0532_04	58.261	243.8996735	221.3298666	206.5435362	37.3561373	14.78633042	0.519549529
20160322_MKY0532_04	58.464	243.803772	221.2410968	206.591682	37.21208994	14.64941472	0.527429946
20160322_MKY0532_04	58.667	244.2394714	221.3391113	206.5728334	37.666638	14.76627781	0.533537613
20160322_MKY0532_04	58.87	243.8337097	221.2199811	206.5816431	37.25206661	14.63833798	0.530091096
20160322_MKY0532_04	59.073	244.0487823	221.2656792	206.4591272	37.58965512	14.80655194	0.526595984
20160322_MKY0532_04	59.276	243.5698395	221.0924467	206.5113706	37.05846886	14.58107606	0.528213269
20160322_MKY0532_04	59.479	243.8248291	221.1984452	206.4761319	37.34869716	14.72231328	0.525543253
20160322_MKY0532_04	59.682	243.2250519	221.0453829	206.5535751	36.67147679	14.49180783	0.521894519
20160322_MKY0532_04	59.885	243.2261658	221.0221662	206.4064741	36.81969169	14.61569211	0.515427372
20160322_MKY0532_04	60.088	243.0432434	220.9305599	206.4386396	36.60460378	14.49192031	0.519244205
20160322_MKY0532_04	60.291	243.3575439	221.0200651	206.5117804	36.84576357	14.50828476	0.527121234
20160322_MKY0532_04	60.494	243.2400208	221.0406555	206.5302192	36.70980154	14.51043631	0.521547103
20160322_MKY0532_04	60.697	242.8752747	220.9412753	206.4560541	36.41922057	14.48522126	0.512592922
20160322_MKY0532_04	60.9	242.9634094	220.9936968	206.5441508	36.41925863	14.44954603	0.516144572
20160322_MKY0532_04	61.103	242.8852539	220.9987394	206.5291948	36.35605907	14.46954453	0.511654338
20160322_MKY0532_04	61.306	243.1313782	221.0367686	206.5789797	36.55239846	14.45778885	0.520589391
20160322_MKY0532_04	61.509	243.0593109	221.0938124	206.5625896	36.49672128	14.53122274	0.511091136
20160322_MKY0532_04	61.712	243.2993317	221.0648177	206.5439459	36.75538575	14.52087182	0.522302654
20160322_MKY0532_04	61.915	243.2289429	221.0801555	206.5220242	36.7069187	14.5581313	0.516693654
20160322_MKY0532_04	62.118	243.0781555	221.07921	206.5519361	36.52621944	14.52727392	0.512642868
20160322_MKY0532_04	62.321	243.2660828	221.0791049	206.4849416	36.78114115	14.59416334	0.516042011
20160322_MKY0532_04	62.524	242.7477875	220.9203698	206.5832821	36.16450536	14.33708767	0.517289088
20160322_MKY0532_04	62.727	242.8919067	220.8612249	206.5341119	36.35779488	14.32711306	0.526009178
20160322_MKY0532_04	62.93	242.8170776	220.9225759	206.4904733	36.32660437	14.43210264	0.514215135
20160322_MKY0532_04	63.133	242.4961243	220.9305599	206.5673018	35.92882249	14.36325815	0.505276267
20160322_MKY0532_04	63.336	243.0543213	221.0155479	206.4871952	36.56712604	14.52835261	0.514146396
20160322_MKY0532_04	63.539	242.8569794	220.9303498	206.6117599	36.24521949	14.31858994	0.522376618
20160322_MKY0532_04	63.742	242.7366943	220.7621599	206.4265519	36.3101424	14.33560796	0.523248092
20160322_MKY0532_04	63.945	242.758316	220.9121756	206.5347265	36.22358955	14.37744916	0.515589545
20160322_MKY0532_04	64.148	242.151886	220.6785377	206.4708052	35.68108082	14.2077325	0.510963931
20160322_MKY0532_04	64.351	242.3165131	220.7299086	206.5593116	35.75720145	14.17059699	0.517800014
20160322_MKY0532_04	64.554	242.3985596	220.7079525	206.5183364	35.88022316	14.18961611	0.520824088
20160322_MKY0532_04	64.757	242.4745026	220.7896838	206.5109609	35.96354169	14.27872292	0.51513655
20160322_MKY0532_04	64.96	241.710083	220.5219036	206.4404835	35.2695995	14.08142005	0.507135518
20160322_MKY0532_04	65.163	241.8697357	220.5636096	206.5214095	35.34832617	14.04220008	0.51434276
20160322_MKY0532_04	65.366	242.0388031	220.6662465	206.5390289	35.49977421	14.12721757	0.511809916
20160322_MKY0532_04	65.569	241.7150726	220.6061561	206.4697808	35.24529185	14.13637533	0.500583421
20160322_MKY0532_04	65.772	242.0304871	220.6350457	206.4630199	35.56746719	14.17202582	0.509997818
20160322_MKY0532_04	65.975	242.5748291	220.6993382	206.5533702	36.02145889	14.14596796	0.530996298
20160322_MKY0532_04	66.178	242.5011139	220.6995483	206.4499078	36.05120609	14.24964047	0.521594834
20160322_MKY0532_04	66.381	242.0049896	220.6200231	206.4279861	35.57700356	14.19203704	0.508358268
20160322_MKY0532_04	66.584	242.1491089	220.7086879	206.5054292	35.64367967	14.20325867	0.509910342
20160322_MKY0532_04	66.787	242.2178497	220.6502784	206.5027658	35.7150839	14.14751256	0.518452157
20160322_MKY0532_04	66.99	242.47229	220.71289	206.4499078	36.02238223	14.2629822	0.519085608
20160322_MKY0532_04	67.193	242.1452332	220.5893476	206.4394591	35.70577403	14.14988849	0.517833444
20160322_MKY0532_04	67.396	242.1169586	220.5775817	206.5869699	35.52998874	13.9906118	0.527077335
20160322_MKY0532_04	67.599	242.2633057	220.6282173	206.4888343	35.77447141	14.139383	0.521684376
20160322_MKY0532_04	67.802	242.5022125	220.6561614	206.5011268	36.00108571	14.15503454	0.529240352
20160322_MKY0532_04	68.005	242.1956787	220.5531043	206.4494981	35.74618066	14.10360626	0.524207801
20160322_MKY0532_04	68.208	242.6347046	220.611829	206.4785905	36.15611414	14.13323852	0.537756872
20160322_MKY0532_04	68.411	241.9700623	220.3899569	206.3876255	35.58243677	14.00233144	0.528003892
20160322_MKY0532_04	68.614	241.4745026	220.3361698	206.5314485	34.94305409	13.80472129	0.522319068
20160322_MKY0532_04	68.817	241.7555389	220.4246244	206.4134399	35.34209907	14.01118457	0.517275461
20160322_MKY0532_04	69.02	242.1263886	220.5061456	206.5160828	35.61030578	13.99006283	0.530417666
20160322_MKY0532_04	69.223	242.298233	220.5778968	206.39664	35.901593	14.1812568	0.522538351
20160322_MKY0532_04	69.426	242.3375854	220.481248	206.4511371	35.88644839	14.03011097	0.537518756
20160322_MKY0532_04	69.629	242.5133057	220.4697972	206.5035853	36.00972033	13.96621192	0.549259565
20160322_MKY0532_04	69.832	242.3941193	220.4894422	206.4820733	35.91204592	14.00736882	0.540938929
20160322_MKY0532_04	70.035	242.6934662	220.6508037	206.4706003	36.2228659	14.18020337	0.535603357
20160322_MKY0532_04	70.238	242.2572021	220.4687467	206.5048146	35.75238756	13.96393213	0.538960927
20160322_MKY0532_04	70.441	242.5587616	220.5356655	206.5175169	36.04124469	14.01814861	0.545082423
20160322_MKY0532_04	70.644	241.713974	220.2865847	206.4060643	35.30790967	13.88052039	0.529446659
20160322_MKY0532_04	70.847	241.9578705	220.2936233	206.447859	35.51001144	13.84576423	0.541446446
20160322_MKY0532_04	71.05	241.4800415	220.1906713	206.3525917	35.12744982	13.83807961	0.526450198
20160322_MKY0532_04	71.253	241.638031	220.166299	206.505839	35.13219204	13.66046001	0.545525351
20160322_MKY0532_04	71.456	241.5598602	220.194033	206.4449908	35.11486945	13.74904221	0.535328432
20160322_MKY0532_04	71.659	241.3935699	220.2581153	206.4015571	34.99201289	13.85655829	0.518924188
20160322_MKY0532_04	71.862	241.6757202	220.2067444	206.4699857	35.20573456	13.73675875	0.540417588
20160322_MKY0532_04	72.065	241.5382538	220.2793361	206.3497234	35.18853037	13.92961265	0.519418232
20160322_MKY0532_04	72.268	241.7826996	220.3110621	206.4699857	35.31271393	13.84107643	0.533790936
20160322_MKY0532_04	72.471	242.4168549	220.4302973	206.3577136	36.05914128	14.07258372	0.540121969
20160322_MKY0532_04	72.674	242.2145233	220.394054	206.4034009	35.81112237	13.99065305	0.538565237
20160322_MKY0532_04	72.877	242.2328186	220.2547537	206.3671379	35.86568072	13.88761577	0.551673136
20160322_MKY0532_04	73.08	242.263855	220.3996218	206.314075	35.94978	14.08554682	0.534332947
20160322_MKY0532_04	73.283	242.3686218	220.3392163	206.393362	35.97525981	13.94585429	0.549998901
20160322_MKY0532_04	73.486	242.3137512	220.3328081	206.5416923	35.77205895	13.79111579	0.558125607
20160322_MKY0532_04	73.689	242.4229431	220.3996218	206.4497029	35.97324019	13.94991888	0.549486237
20160322_MKY0532_04	73.892	242.6895752	220.4641244	206.4730588	36.2165164	13.99106558	0.555093287
20160322_MKY0532_04	74.095	242.3320465	220.2962496	206.3566892	35.97535731	13.9395604	0.550669027
20160322_MKY0532_04	74.298	242.375824	220.3354344	206.4587175	35.9171065	13.87671692	0.55495262
20160322_MKY0532_04	74.501	242.2605286	220.231642	206.5230486	35.73748001	13.70859342	0.565612998
20160322_MKY0532_04	74.704	242.281601	220.2377351	206.4728539	35.80874703	13.76488113	0.562477264
20160322_MKY0532_04	74.907	242.0892487	220.3090661	206.4564638	35.63278482	13.85260224	0.545791158
20160322_MKY0532_04	75.11	241.8763886	220.1885702	206.4417128	35.43467579	13.74685746	0.548865461
20160322_MKY0532_04	75.313	242.0487823	220.243513	206.45462	35.59416239	13.78889302	0.550986277
20160322_MKY0532_04	75.516	242.1430206	220.245509	206.489244	35.65377662	13.75626497	0.556966319
20160322_MKY0532_04	75.719	242.048233	220.1304759	206.3278017	35.72043135	13.80267421	0.554744186
20160322_MKY0532_04	75.922	242.0504456	220.1824772	206.5037902	35.54665535	13.67868694	0.560894276
20160322_MKY0532_04	76.125	242.2782745	220.2734531	206.4501127	35.82816185	13.82334041	0.556988565
20160322_MKY0532_04	76.328	241.7738342	220.1193403	206.4835075	35.29032675	13.63583279	0.554814239
20160322_MKY0532_04	76.531	241.8935699	220.1398256	206.3521819	35.54138802	13.78764368	0.548930973
20160322_MKY0532_04	76.734	242.2034302	220.2234478	206.4675271	35.73590303	13.75592069	0.560417868
20160322_MKY0532_04	76.937	242.1064301	220.1934027	206.4671174	35.63931266	13.72628527	0.559601153
20160322_MKY0532_04	77.14	242.1790466	220.1606261	206.3359967	35.84304991	13.82462939	0.55746626
20160322_MKY0532_04	77.343	242.2106476	220.2042231	206.42983	35.78081763	13.77439318	0.560290226
20160322_MKY0532_04	77.546	242.5454559	220.2934132	206.4402786	36.1051773	13.85313454	0.56523679
20160322_MKY0532_04	77.749	242.5853729	220.2817523	206.4376152	36.14775768	13.84413704	0.567964548
20160322_MKY0532_04	77.952	242.3464508	220.2064292	206.4333128	35.91313796	13.7731164	0.565922367
20160322_MKY0532_04	78.155	242.2405701	220.1944532	206.3298504	35.91071963	13.86460276	0.55598255
20160322_MKY0532_04	78.358	242.4257202	220.255489	206.5164925	35.90922769	13.7389965	0.569463003
20160322_MKY0532_04	78.561	242.303772	220.1234373	206.3988937	35.9048783	13.72454367	0.570855867
20160322_MKY0532_04	78.764	242.2594299	220.1264839	206.5291948	35.73023509	13.59728904	0.577512737
20160322_MKY0532_05	-3.248	332.2222222	229.7903093	207.929316	124.2929063	21.86099337	0.996835955
20160322_MKY0532_05	-3.045	325.4722222	228.4782371	207.8986971	117.5735252	20.57954	1.002136746
20160322_MKY0532_05	-2.842	325.1712963	228.4763208	207.9084691	117.2628272	20.56785178	0.999852862
20160322_MKY0532_05	-2.639	324.912037	228.259239	207.8071661	117.1048709	20.45207286	1.004581017
20160322_MKY0532_05	-2.436	324.0833333	228.0837668	207.7143322	116.3690011	20.36943452	1.00209737
20160322_MKY0532_05	-2.233	325.0601852	228.056392	207.5612378	117.4989474	20.49515422	1.00596605
20160322_MKY0532_05	-2.03	324.8564815	228.0569395	207.5827362	117.2737453	20.47420335	1.004977567
20160322_MKY0532_05	-1.827	324.6388889	227.8321927	207.5775244	117.0613645	20.25466829	1.014914238
20160322_MKY0532_05	-1.624	322.4166667	227.6244183	207.4885993	114.9280673	20.13581894	1.00108065
20160322_MKY0532_05	-1.421	323.2453704	227.7426773	207.3664495	115.8789209	20.37622774	0.997098709
20160322_MKY0532_05	-1.218	323.6157407	227.8513551	207.471987	116.1437538	20.37936808	0.999432559
20160322_MKY0532_05	-1.015	321.4259259	227.5685738	207.429316	113.99661	20.13925781	0.991985944
20160322_MKY0532_05	-0.812	321.5185185	227.5450315	207.4361564	114.0823622	20.10887513	0.994454207
20160322_MKY0532_05	-0.609	320.3055556	227.3712018	207.2612378	113.0443178	20.10996397	0.984454344
20160322_MKY0532_05	0	212.7453704	218.0854093	207.2006515	5.544718904	10.88475779	0
20160322_MKY0532_05	0.203	213.5046296	218.1836846	207.1921824	6.31244722	10.99150223	0.012498554
20160322_MKY0532_05	0.406	214.287037	218.2113332	207.2159609	7.071076125	10.99537224	0.025746785
20160322_MKY0532_05	0.609	214.6111111	218.0851355	207.0257329	7.585378212	11.05940261	0.033985441
20160322_MKY0532_05	0.812	214.2407407	218.0495483	207.0938111	7.146929666	10.95573724	0.027528193
20160322_MKY0532_05	1.015	214.8842593	218.1795784	207.1781759	7.706083363	11.00140253	0.036794765
20160322_MKY0532_05	1.218	214.9861111	218.0755543	207.1449511	7.841159971	10.9306032	0.040048352
20160322_MKY0532_05	1.421	215.7314815	218.0186148	207.0530945	8.678387018	10.96552037	0.054312149
20160322_MKY0532_05	1.624	216.4027778	218.0561183	207.0407166	9.362061166	11.01540165	0.065574548
20160322_MKY0532_05	1.827	215.8611111	218.2003832	207.0840391	8.777072023	11.11634416	0.053953874
20160322_MKY0532_05	2.03	216.6018519	218.0947167	207.0504886	9.551363253	11.04422807	0.068448243
20160322_MKY0532_05	2.233	217.0092593	218.0788393	207.0895765	9.919682712	10.98926276	0.075735869
20160322_MKY0532_05	2.436	216.4583333	217.9518204	207.0801303	9.37820304	10.87169013	0.068024091
20160322_MKY0532_05	2.639	217.1712963	218.1242814	207.1127036	10.05859271	11.01157783	0.077812973
20160322_MKY0532_05	2.842	217.4583333	218.0637832	207.0286645	10.42966884	11.0351187	0.083913579
20160322_MKY0532_05	3.045	217.6944444	217.8757186	207.0859935	10.60845096	10.7897251	0.091244182
20160322_MKY0532_05	3.248	218.2777778	218.0591295	207.095114	11.18266377	10.96401548	0.09832017
20160322_MKY0532_05	3.451	218.3194444	217.8929647	206.919544	11.39990047	10.97342071	0.101964266
20160322_MKY0532_05	3.654	218.3009259	217.9583904	207.0335505	11.26737544	10.92483988	0.100517799
20160322_MKY0532_05	3.857	218.4814815	217.8278128	207.0807818	11.40069972	10.747031	0.106193028
20160322_MKY0532_05	4.06	218.537037	217.8316452	207.0762215	11.46081554	10.75542373	0.107110013
20160322_MKY0532_05	4.263	218.7638889	218.0580345	206.9179153	11.84597358	11.14011918	0.106681853
20160322_MKY0532_05	4.466	219.1851852	217.9115795	206.9954397	12.18974545	10.91613978	0.11694839
20160322_MKY0532_05	4.669	219.5787037	217.9646866	206.8504886	12.72821511	11.11419796	0.122446452
20160322_MKY0532_05	4.872	219.9861111	218.024911	206.9599349	13.02617626	11.06497618	0.128613414
20160322_MKY0532_05	5.075	220.375	217.8450589	206.8387622	13.53623778	11.00629664	0.138746839
20160322_MKY0532_05	5.278	219.7638889	217.9808377	206.9938111	12.77007781	10.98702659	0.125732989
20160322_MKY0532_05	5.481	220.7314815	217.9986313	206.9566775	13.77480396	11.04195374	0.142142789
20160322_MKY0532_05	5.684	220.5648148	217.9351218	207.0605863	13.5042285	10.8745355	0.141049739
20160322_MKY0532_05	5.887	220.9212963	217.918697	206.9374593	13.98383701	10.98123768	0.147136978
20160322_MKY0532_05	6.09	221.6018519	217.8562825	206.9442997	14.65755218	10.91198283	0.16058352
20160322_MKY0532_05	6.293	222.3657407	217.9126745	206.9315961	15.43414465	10.98107842	0.172575304
20160322_MKY0532_05	6.496	221.7361111	217.8261703	206.8863192	14.84979189	10.93985105	0.163308655
20160322_MKY0532_05	6.699	221.9953704	217.8696961	206.8781759	15.11719447	10.99152024	0.166764932
20160322_MKY0532_05	6.902	222.5972222	217.9077471	206.9960912	15.60113102	10.91165585	0.177244567
20160322_MKY0532_05	7.105	222.5601852	217.8081029	206.8980456	15.66213958	10.91005733	0.178361813
20160322_MKY0532_05	7.308	222.6898148	217.7826444	206.8947883	15.79502654	10.88785613	0.181276001
20160322_MKY0532_05	7.511	223.4351852	217.8721599	206.9250814	16.51010375	10.94707844	0.192344223
20160322_MKY0532_05	7.714	222.8657407	217.7886668	206.9175896	15.94815116	10.87107727	0.184419799
20160322_MKY0532_05	7.917	223.5740741	217.7924993	206.8221498	16.75192424	10.97034948	0.195973185
20160322_MKY0532_05	8.12	223.1990741	217.7889406	206.8576547	16.34141935	10.93128587	0.189792055
20160322_MKY0532_05	8.323	223.5601852	217.8877635	206.8254072	16.73477802	11.06235632	0.193228845
20160322_MKY0532_05	8.526	224.1296296	217.7935943	206.9198697	17.20975992	10.8737246	0.206694919
20160322_MKY0532_05	8.729	223.912037	217.7380235	206.8260586	17.0859784	10.91196491	0.203442213
20160322_MKY0532_05	8.932	223.8796296	217.7150287	206.8710098	17.00861986	10.84401897	0.203957785
20160322_MKY0532_05	9.135	223.7777778	217.6947714	206.7729642	17.00481361	10.92180725	0.20173932
20160322_MKY0532_05	9.338	224.8888889	217.8220641	206.952443	17.93644589	10.86962106	0.219684921
20160322_MKY0532_05	9.541	224.7916667	217.7079113	206.8175896	17.97407709	10.89032173	0.219746321
20160322_MKY0532_05	9.744	224.8194444	217.7120175	206.8224756	17.99696887	10.88954195	0.22017392
20160322_MKY0532_05	9.947	225.4305556	217.6999726	206.828013	18.60254253	10.8719596	0.231415481
20160322_MKY0532_05	10.15	225.2731481	217.6266083	206.7491857	18.52396248	10.8774226	0.229858757
20160322_MKY0532_05	10.353	225.8842593	217.6372844	206.7514658	19.13279346	10.88581863	0.240376616
20160322_MKY0532_05	10.556	226.1944444	217.7109225	206.7166124	19.47783207	10.99431015	0.243080361
20160322_MKY0532_05	10.759	225.3842593	217.6063509	206.8065147	18.5777446	10.79983629	0.233173861
20160322_MKY0532_05	10.962	226.4398148	217.7347386	206.7	19.73981482	11.03473857	0.246402541
20160322_MKY0532_05	11.165	226.3564815	217.7812757	206.8811075	19.47537399	10.90016817	0.245983629
20160322_MKY0532_05	11.368	225.6898148	217.4883657	206.8794788	18.81033599	10.6088869	0.243358656
20160322_MKY0532_05	11.571	225.7638889	217.5658363	206.7120521	19.05183677	10.85378418	0.239939188
20160322_MKY0532_05	11.774	226.7685185	217.6120996	206.7745928	19.99392568	10.83750681	0.257187667
20160322_MKY0532_05	11.977	226.4490741	217.6435806	206.723127	19.72594704	10.92045358	0.249763291
20160322_MKY0532_05	12.18	226.5509259	217.6739666	206.7364821	19.81444384	10.93748452	0.250779825
20160322_MKY0532_05	12.383	226.5787037	217.5039693	206.8107492	19.76795452	10.69322015	0.257912027
20160322_MKY0532_05	12.586	227.3611111	217.5056118	206.742671	20.6184401	10.76294082	0.270823517
20160322_MKY0532_05	12.789	227.9305556	217.6227758	206.7814332	21.14912233	10.84134258	0.277582348
20160322_MKY0532_05	12.992	227.8888889	217.6074459	206.7771987	21.11169019	10.83024724	0.277301619
20160322_MKY0532_05	13.195	228.3194444	217.6131946	206.8654723	21.45397213	10.74772232	0.286317199
20160322_MKY0532_05	13.398	228.6759259	217.7251574	206.8156352	21.86029075	10.90952223	0.287788416
20160322_MKY0532_05	13.601	228.4814815	217.5644676	206.7970684	21.68441308	10.76739916	0.289736254
20160322_MKY0532_05	13.804	229.3240741	217.5562551	206.8315961	22.49247798	10.72465904	0.305792138
20160322_MKY0532_05	14.007	229.9351852	217.7684095	206.8726384	23.06254675	10.89577109	0.309525076
20160322_MKY0532_05	14.21	228.9444444	217.5212154	206.7153094	22.229135	10.80590599	0.29806212
20160322_MKY0532_05	14.413	228.9537037	217.5518752	206.7973941	22.15630957	10.75448103	0.298652376
20160322_MKY0532_05	14.616	229.1944444	217.5691213	206.7491857	22.44525878	10.8199356	0.301395157
20160322_MKY0532_05	14.819	230.0462963	217.6515193	206.8482085	23.19808783	10.80331083	0.315429914
20160322_MKY0532_05	15.022	229.3009259	217.3928278	206.704886	22.59603993	10.68794182	0.309045698
20160322_MKY0532_05	15.225	229.3611111	217.4607172	206.8442997	22.51681144	10.61641754	0.310351505
20160322_MKY0532_05	15.428	229.4490741	217.4117164	206.8035831	22.64549101	10.60813333	0.313006535
20160322_MKY0532_05	15.631	229.9814815	217.5901998	206.665798	23.31568344	10.92440179	0.312919185
20160322_MKY0532_05	15.834	229.9259259	217.5088968	206.77557	23.15035589	10.73332676	0.317269821
20160322_MKY0532_05	16.037	230.0324074	217.3799617	206.7058632	23.32654421	10.67409848	0.322753391
20160322_MKY0532_05	16.24	230.3194444	217.4681084	206.7052117	23.61423272	10.76289668	0.324428788
20160322_MKY0532_05	16.443	230.1342593	217.3810567	206.8159609	23.31829835	10.56509575	0.326945145
20160322_MKY0532_05	16.646	230.4861111	217.3922803	206.7387622	23.7473489	10.6535181	0.331173162
20160322_MKY0532_05	16.849	229.7592593	217.3796879	206.6267101	23.13254916	10.75297783	0.316191821
20160322_MKY0532_05	17.052	229.587963	217.1856009	206.8241042	22.76385873	10.36149664	0.32499221
20160322_MKY0532_05	17.255	230.3425926	217.2573227	206.6801303	23.6624623	10.57719246	0.332725286
20160322_MKY0532_05	17.458	230.8101852	217.2116069	206.7635179	24.04666727	10.44808898	0.34513058
20160322_MKY0532_05	17.661	230.9675926	217.2912675	206.7035831	24.26400953	10.58768439	0.34323997
20160322_MKY0532_05	17.864	231.8564815	217.4067889	206.832899	25.02358246	10.57388992	0.357649721
20160322_MKY0532_05	18.067	231.0925926	217.3536819	206.7351792	24.35741344	10.61850275	0.343653059
20160322_MKY0532_05	18.27	231.5787037	217.3487544	206.6530945	24.92560924	10.69565998	0.350696944
20160322_MKY0532_05	18.473	232.2175926	217.3082398	206.6514658	25.5661268	10.656774	0.363909501
20160322_MKY0532_05	18.676	231.9074074	217.260334	206.7781759	25.12923151	10.48215808	0.363579112
20160322_MKY0532_05	18.879	231.4768519	217.2269368	206.7055375	24.77131439	10.5213993	0.355305991
20160322_MKY0532_05	19.082	232.7314815	217.2562278	206.6214984	26.10998311	10.63472939	0.374715705
20160322_MKY0532_05	19.285	232.9583333	217.3509444	206.818241	26.14009229	10.53270339	0.379846206
20160322_MKY0532_05	19.488	233.3981481	217.3441007	206.6736156	26.72453251	10.6704851	0.384222716
20160322_MKY0532_05	19.691	232.8009259	217.280865	206.6550489	26.14587707	10.62581618	0.375762852
20160322_MKY0532_05	19.894	232.4953704	217.1021079	206.6928339	25.80253649	10.40927398	0.379268454
20160322_MKY0532_05	20.097	233.1805556	217.4872707	206.7628665	26.41768911	10.72440429	0.376287674
20160322_MKY0532_05	20.3	233.0648148	217.2064057	206.7	26.36481482	10.50640569	0.385161641
20160322_MKY0532_05	20.503	232.6527778	217.2879825	206.7446254	25.90815237	10.54335707	0.375126737
20160322_MKY0532_05	20.706	232.9490741	217.1292089	206.781759	26.16731512	10.34744991	0.388909692
20160322_MKY0532_05	20.909	233.5694444	217.2365179	206.77557	26.79387441	10.4609479	0.395160413
20160322_MKY0532_05	21.112	233.1805556	217.1617848	206.7394137	26.44114188	10.42237115	0.390468482
20160322_MKY0532_05	21.315	234.0972222	217.3561456	206.7798046	27.31741766	10.57634107	0.399311688
20160322_MKY0532_05	21.518	233.3657407	217.1803997	206.5912052	26.77453553	10.58919446	0.388834778
20160322_MKY0532_05	21.721	233.6435185	217.2710101	206.6677524	26.97576608	10.60325769	0.39184378
20160322_MKY0532_05	21.924	233.9722222	217.2978374	206.6957655	27.27645675	10.60207192	0.397360453
20160322_MKY0532_05	22.127	233.662037	217.2346017	206.7534202	26.90861684	10.4811815	0.396316458
20160322_MKY0532_05	22.33	233.1666667	217.0375034	206.619544	26.54712269	10.41795945	0.39263448
20160322_MKY0532_05	22.533	233.6574074	217.13879	206.6035831	27.05382434	10.53520697	0.396435394
20160322_MKY0532_05	22.736	233.7824074	217.1001916	206.667101	27.11530643	10.43309065	0.402410661
20160322_MKY0532_05	22.939	234.2083333	217.1346838	206.6270358	27.5812975	10.50764799	0.407399793
20160322_MKY0532_05	23.142	233.8101852	217.2302217	206.7335505	27.0766347	10.49667125	0.39866945
20160322_MKY0532_05	23.345	233.6712963	217.0771968	206.6843648	26.98693148	10.392832	0.401970683
20160322_MKY0532_05	23.548	234.1759259	217.1812209	206.7390879	27.43683798	10.44213297	0.407907141
20160322_MKY0532_05	23.751	234.2222222	217.0046537	206.7140065	27.50821571	10.29064719	0.41669172
20160322_MKY0532_05	23.954	234.5277778	217.1568574	206.6638436	27.86393413	10.49301373	0.413292093
20160322_MKY0532_05	24.157	234.1203704	217.1439912	206.5840391	27.53633128	10.55995215	0.40407597
20160322_MKY0532_05	24.36	234.1990741	217.0197098	206.6850163	27.51405779	10.33469354	0.414606542
20160322_MKY0532_05	24.563	234.3194444	217.0780181	206.6781759	27.64126855	10.39984217	0.413750389
20160322_MKY0532_05	24.766	234.125	217.1623323	206.5882736	27.53672638	10.57405871	0.403413225
20160322_MKY0532_05	24.969	234.7175926	217.0698056	206.6612378	28.05635481	10.40856785	0.421001274
20160322_MKY0532_05	25.172	235.4814815	217.1281139	206.6778502	28.80363132	10.45026372	0.43270113
20160322_MKY0532_05	25.375	235.1944444	216.9934301	206.6315961	28.56284835	10.36183397	0.432756001
20160322_MKY0532_05	25.578	234.3101852	216.9518204	206.7778502	27.53233502	10.17397026	0.423052005
20160322_MKY0532_05	25.781	234.6574074	217.1281139	206.7149837	27.94242369	10.41313017	0.418666795
20160322_MKY0532_05	25.984	235.5833333	217.2252943	206.6863192	28.89701412	10.53897506	0.429939529
20160322_MKY0532_05	26.187	235.6157407	217.1267451	206.6925081	28.9232326	10.434237	0.435723863
20160322_MKY0532_05	26.39	235.7037037	217.1541199	206.6469055	29.05679817	10.50721436	0.434464254
20160322_MKY0532_05	26.593	235.7037037	216.9364906	206.6400651	29.06363856	10.29642541	0.445494897
20160322_MKY0532_05	26.796	235.6712963	216.9269094	206.6247557	29.0465406	10.30215369	0.444873027
20160322_MKY0532_05	26.999	235.1203704	216.9315631	206.5374593	28.58291109	10.39410382	0.431479606
20160322_MKY0532_05	27.202	235.1527778	216.9509992	206.6742671	28.47851068	10.27673208	0.435571597
20160322_MKY0532_05	27.405	234.9074074	216.9920613	206.6006515	28.30675594	10.39140985	0.426499005
20160322_MKY0532_05	27.608	234.7407407	216.7966055	206.6687296	28.0720111	10.12787589	0.435685788
20160322_MKY0532_05	27.811	234.4722222	216.8436901	206.6247557	27.84746652	10.21893442	0.42669769
20160322_MKY0532_05	28.014	234.7453704	216.9148645	206.6482085	28.0971619	10.26665603	0.428942069
20160322_MKY0532_05	28.217	234.7314815	216.8305502	206.7019544	28.02952708	10.12859584	0.434840074
20160322_MKY0532_05	28.42	235.25	216.8614837	206.6442997	28.60570033	10.21718404	0.44107932
20160322_MKY0532_05	28.623	234.7638889	216.8707911	206.4612378	28.3026511	10.40955335	0.425508704
20160322_MKY0532_05	28.826	235.1574074	216.833014	206.652443	28.50496441	10.18057096	0.441112841
20160322_MKY0532_05	29.029	235.3935185	216.9285519	206.5716612	28.82185728	10.35689064	0.437825506
20160322_MKY0532_05	29.232	234.587963	216.7738845	206.7407166	27.84724635	10.03316787	0.43641024
20160322_MKY0532_05	29.435	234.2453704	216.7098275	206.6827362	27.56263421	10.02709138	0.431267887
20160322_MKY0532_05	29.638	234.9398148	216.7987955	206.6019544	28.33786042	10.19684111	0.437096491
20160322_MKY0532_05	29.841	234.8333333	216.6958664	206.5247557	28.30857763	10.17111071	0.437895966
20160322_MKY0532_05	30.044	234.0138889	216.6512456	206.680456	27.33343286	9.970789526	0.429830158
20160322_MKY0532_05	30.247	235.5138889	216.7629346	206.6680782	28.84581071	10.0948564	0.452193621
20160322_MKY0532_05	30.45	235.2731481	216.6493293	206.5306189	28.74252925	10.11871043	0.448930681
20160322_MKY0532_05	30.653	234.875	216.7035313	206.5322476	28.34275244	10.17128379	0.438533903
20160322_MKY0532_05	30.856	235.9814815	216.6977826	206.6022801	29.37920135	10.09550251	0.462333301
20160322_MKY0532_05	31.059	235.6527778	216.6463181	206.6592834	28.99349439	9.987034707	0.460982488
20160322_MKY0532_05	31.262	235.9305556	216.6693129	206.6644951	29.26606044	10.00481778	0.465235312
20160322_MKY0532_05	31.465	236.0972222	216.5721325	206.6022801	29.49494209	9.969852364	0.471632143
20160322_MKY0532_05	31.668	236.3287037	216.6372844	206.6087948	29.71990892	10.02848964	0.472620992
20160322_MKY0532_05	31.871	236.875	216.7996168	206.6674267	30.20757329	10.13219004	0.476048743
20160322_MKY0532_05	32.074	236.4490741	216.6386532	206.5947883	29.8542858	10.04386489	0.474323862
20160322_MKY0532_05	32.277	236.1944444	216.5945798	206.6429967	29.5514477	9.951583054	0.473771554
20160322_MKY0532_05	32.48	237.3564815	216.6331782	206.5739414	30.78254011	10.05923684	0.491220227
20160322_MKY0532_05	32.683	237.3055556	216.6728716	206.5703583	30.73519725	10.10251331	0.487793252
20160322_MKY0532_05	32.886	236.9953704	216.5338078	206.5449511	30.45041923	9.988856689	0.488969365
20160322_MKY0532_05	33.089	237.0648148	216.6189433	206.5996743	30.46514055	10.01926907	0.487470337
20160322_MKY0532_05	33.292	236.9768519	216.4765946	206.5570033	30.4198486	9.919591323	0.492475188
20160322_MKY0532_05	33.495	236.9490741	216.4150014	206.5628665	30.38620762	9.852134919	0.49586121
20160322_MKY0532_05	33.698	236.6944444	216.3821517	206.6508143	30.04363011	9.731337324	0.496454695
20160322_MKY0532_05	33.901	236.9212963	216.4629072	206.6221498	30.29914646	9.840757363	0.494844168
20160322_MKY0532_05	34.104	236.2407407	216.2718314	206.5745928	29.66614791	9.697238537	0.491048811
20160322_MKY0532_05	34.307	236.2546296	216.3588831	206.6553746	29.59925504	9.703508517	0.489340539
20160322_MKY0532_05	34.51	236.8333333	216.3265809	206.3615635	30.47176982	9.965017374	0.490786428
20160322_MKY0532_05	34.713	237.037037	216.42732	206.6185668	30.41847026	9.808753236	0.499121587
20160322_MKY0532_05	34.916	237.1990741	216.5146455	206.5736156	30.62545844	9.941029862	0.495184705
20160322_MKY0532_05	35.119	238.0740741	216.5513277	206.680456	31.39361805	9.87087165	0.514388333
20160322_MKY0532_05	35.322	238.6851852	216.5261429	206.4895765	32.19560864	10.03656635	0.519665201
20160322_MKY0532_05	35.525	238.0185185	216.4949357	206.4843648	31.5341537	10.01057085	0.508544528
20160322_MKY0532_05	35.728	238.5231481	216.430605	206.770684	31.75246411	9.659920943	0.534917679
20160322_MKY0532_05	35.931	239.1898148	216.366548	206.585342	32.60447279	9.781206023	0.543843437
20160322_MKY0532_05	36.134	238.9814815	216.4500411	206.5439739	32.43750754	9.906067121	0.532506125
20160322_MKY0532_05	36.337	239.1342593	216.4730359	206.6306189	32.50364037	9.842416968	0.537878194
20160322_MKY0532_05	36.54	239.6342593	216.4681084	206.3892508	33.24500844	10.07885759	0.537124323
20160322_MKY0532_05	36.743	239.2685185	216.3320558	206.4074919	32.86102666	9.924563988	0.539548987
20160322_MKY0532_05	36.946	238.6666667	216.1699973	206.471987	32.1946797	9.698010292	0.541212878
20160322_MKY0532_05	37.149	239.7222222	216.3534082	206.619544	33.10267825	9.733864184	0.55682241
20160322_MKY0532_05	37.352	239.5648148	216.2937312	206.4732899	33.09152491	9.820441278	0.550829881
20160322_MKY0532_05	37.555	239.7546296	216.2085957	206.5530945	33.20153517	9.655501212	0.564109414
20160322_MKY0532_05	37.758	239.4861111	216.2641664	206.5433225	32.94278864	9.720843963	0.554532033
20160322_MKY0532_05	37.961	238.6574074	216.2849713	206.5543974	32.10301001	9.730573863	0.537259139
20160322_MKY0532_05	38.164	239.4537037	216.2619765	206.6208469	32.8328568	9.641129552	0.55773223
20160322_MKY0532_05	38.367	239.6203704	216.3566931	206.6869707	32.93339969	9.669722445	0.557795359
20160322_MKY0532_05	38.57	240.5416667	216.3019436	206.5068404	34.03482628	9.795103217	0.571054705
20160322_MKY0532_05	38.773	239.8240741	216.3128935	206.5824104	33.24166365	9.730483089	0.559800706
20160322_MKY0532_05	38.976	239.1203704	216.0832193	206.5778502	32.54252021	9.505369109	0.561216892
20160322_MKY0532_05	39.179	240.087963	216.205037	206.4859935	33.60196948	9.719043471	0.567714456
20160322_MKY0532_05	39.382	239.5787037	216.2660827	206.5713355	33.0073682	9.694747167	0.557571659
20160322_MKY0532_05	39.585	240.337963	216.1587736	206.5140065	33.82395645	9.644767096	0.577274537
20160322_MKY0532_05	39.788	239.9537037	216.1990145	206.7065147	33.24718905	9.492499851	0.576406833
20160322_MKY0532_05	39.991	240.3055556	216.1886121	206.4416938	33.86386175	9.746918289	0.570984812
20160322_MKY0532_05	40.194	239.8333333	216.2589652	206.6	33.23333333	9.658965234	0.564505916
20160322_MKY0532_05	40.397	239.5462963	216.1256502	206.5478827	32.99841356	9.577767415	0.565399781
20160322_MKY0532_05	40.6	239.2731481	216.0963592	206.5153094	32.7578387	9.581049711	0.560336884
20160322_MKY0532_05	40.803	239.4398148	216.146455	206.6309446	32.80887019	9.515510344	0.56590477
20160322_MKY0532_05	41.006	239.9537037	216.1480975	206.604886	33.34881771	9.543211461	0.574873423
20160322_MKY0532_05	41.209	239.462963	216.1418013	206.519544	32.94341899	9.622257285	0.561231325
20160322_MKY0532_05	41.412	240.1435185	216.0736381	206.5058632	33.63765533	9.567774914	0.578959426
20160322_MKY0532_05	41.615	240.2453704	215.9975363	206.4811075	33.76426288	9.51642878	0.585174636
20160322_MKY0532_05	41.818	239.5324074	216.0208048	206.6140065	32.91840089	9.406798303	0.575820888
20160322_MKY0532_05	42.021	240.4351852	216.0977279	206.537785	33.89740017	9.559942879	0.584746552
20160322_MKY0532_05	42.224	241.0185185	216.0736381	206.5511401	34.46737845	9.522498041	0.598958779
20160322_MKY0532_05	42.427	240.8657407	216.0758281	206.6550489	34.21069188	9.420779227	0.601237914
20160322_MKY0532_05	42.63	240.9259259	216.0728169	206.5667752	34.35915068	9.506041619	0.597972936
20160322_MKY0532_05	42.833	240.9305556	216.1910758	206.5361564	34.3943992	9.654919476	0.587942629
20160322_MKY0532_05	43.036	241.3333333	216.088968	206.565798	34.76753529	9.523169926	0.60497947
20160322_MKY0532_05	43.239	242.1851852	216.3356146	206.5312704	35.65391483	9.804344205	0.602226752
20160322_MKY0532_05	43.442	241.1898148	216.1812209	206.5863192	34.6034956	9.594901696	0.596430755
20160322_MKY0532_05	43.645	240.8564815	216.0928004	206.5042345	34.35224695	9.58856591	0.591843497
20160322_MKY0532_05	43.848	240.8287037	215.9518204	206.5941368	34.2345669	9.357683614	0.60644466
20160322_MKY0532_05	44.051	240.9675926	216.0509171	206.4465798	34.52101279	9.604337249	0.594094531
20160322_MKY0532_05	44.254	241.2592593	216.1697235	206.4820847	34.77717457	9.687638824	0.593234757
20160322_MKY0532_05	44.457	241.0462963	216.14755	206.4648208	34.58147545	9.682729112	0.589693028
20160322_MKY0532_05	44.66	240.9166667	216.0566658	206.480456	34.43621064	9.576209728	0.594422269
20160322_MKY0532_05	44.863	241.4768519	215.9578429	206.5456026	34.93124925	9.412240263	0.616615448
20160322_MKY0532_05	45.066	241.4074074	216.1220914	206.5566775	34.85072988	9.565413908	0.603549396
20160322_MKY0532_05	45.269	240.8287037	216.1242814	206.5553746	34.27332911	9.56890682	0.591672697
20160322_MKY0532_05	45.472	241.1759259	216.0156036	206.6068404	34.56908554	9.408763222	0.609466726
20160322_MKY0532_05	45.675	240.287037	216.0443471	206.5830619	33.70397515	9.461285223	0.587929864
20160322_MKY0532_05	45.878	240.4398148	216.005475	206.5312704	33.90854446	9.474204594	0.591152615
20160322_MKY0532_05	46.081	240.4027778	216.0016425	206.5319218	33.87085595	9.469720662	0.590712527
20160322_MKY0532_05	46.284	241.1666667	216.0676157	206.5260586	34.64060803	9.541557026	0.601062777
20160322_MKY0532_05	46.487	240.412037	215.9282781	206.4872964	33.92474062	9.440981711	0.593908479
20160322_MKY0532_05	46.69	240.3703704	215.8929647	206.5397394	33.83063096	9.353225273	0.598463548
20160322_MKY0532_05	46.893	241.2407407	215.9452505	206.4944625	34.7462782	9.450787938	0.609931084
20160322_MKY0532_05	47.096	241.875	216.1502874	206.5553746	35.31962541	9.594912842	0.610803476
20160322_MKY0532_05	47.299	240.9305556	215.8461538	206.4837134	34.4468422	9.362440491	0.61045309
20160322_MKY0532_05	47.502	240.8009259	215.9025459	206.6068404	34.19408554	9.295705462	0.610303487
20160322_MKY0532_05	47.705	240.6157407	216.0073912	206.5462541	34.06948667	9.461137113	0.59538056
20160322_MKY0532_05	47.908	241.5	216.1212702	206.5615635	34.93843648	9.559706671	0.605735141
20160322_MKY0532_05	48.111	240.5092593	215.886121	206.5986971	33.91056219	9.287423928	0.605056129
20160322_MKY0532_05	48.314	241.1481481	215.9898713	206.6029316	34.54521655	9.386939743	0.610622043
20160322_MKY0532_05	48.517	241.1990741	216.0604982	206.5794788	34.61959525	9.481019394	0.605100219
20160322_MKY0532_05	48.72	241.4259259	216.0164249	206.6022801	34.8236458	9.414144726	0.61426967
20160322_MKY0532_05	48.923	241.0694444	215.9422393	206.5446254	34.52481904	9.397613848	0.609399057
20160322_MKY0532_05	49.126	241	215.8321927	206.5654723	34.43452769	9.266720405	0.617516141
20160322_MKY0532_05	49.329	240.7361111	215.8280865	206.4791531	34.25695802	9.34893341	0.607565325
20160322_MKY0532_05	49.532	240.0509259	215.824254	206.4762215	33.57470443	9.34803254	0.593578089
20160322_MKY0532_05	49.735	240.8101852	215.8683274	206.5752443	34.23494088	9.293083102	0.611350033
20160322_MKY0532_05	49.938	240.8055556	215.8502601	206.5482085	34.25734709	9.302051591	0.611129898
20160322_MKY0532_05	50.141	241.3842593	215.8696961	206.509772	34.87448727	9.359924153	0.619442386
20160322_MKY0532_05	50.344	241.1481481	216.027101	206.3703583	34.77778984	9.656742707	0.595458911
20160322_MKY0532_05	50.547	241.2222222	215.7648508	206.5107492	34.71147304	9.254101622	0.624255265
20160322_MKY0532_05	50.75	241.2361111	215.8133041	206.4895765	34.74653456	9.323727587	0.619585182
20160322_MKY0532_05	50.953	240.7638889	215.8529975	206.4807818	34.28310713	9.372215777	0.606349628
20160322_MKY0532_05	51.156	241.4305556	215.8529975	206.6029316	34.82762396	9.25006594	0.626988609
20160322_MKY0532_05	51.359	240.037037	215.8291815	206.5019544	33.53508264	9.327227098	0.594302881
20160322_MKY0532_05	51.562	241.5787037	215.7558171	206.5482085	35.03049523	9.207608668	0.634575206
20160322_MKY0532_05	51.765	241.7268519	215.7380235	206.6185668	35.10828508	9.119456767	0.643300245
20160322_MKY0532_05	51.968	242.4768519	215.8948809	206.5693811	35.90747075	9.325499813	0.643423255
20160322_MKY0532_05	52.171	241.8333333	215.833014	206.5201954	35.31313789	9.312818521	0.632142726
20160322_MKY0532_05	52.374	241.2361111	215.7278949	206.5872964	34.64881469	9.140598464	0.631904975
20160322_MKY0532_05	52.577	242.3935185	215.8855735	206.513355	35.88016347	9.372218452	0.639165794
20160322_MKY0532_05	52.78	242.6666667	215.7632083	206.4684039	36.19826276	9.294804413	0.651897054
20160322_MKY0532_05	52.983	242.6574074	215.8390364	206.5302932	36.12711425	9.308743248	0.649302082
20160322_MKY0532_05	53.186	242.537037	215.7727895	206.4087948	36.12824225	9.3639947	0.644915292
20160322_MKY0532_05	53.389	242.787037	215.6742404	206.4905537	36.29648329	9.183686604	0.663031309
20160322_MKY0532_05	53.592	242.3796296	215.7426773	206.6713355	35.70829413	9.071341747	0.659970621
20160322_MKY0532_05	53.795	242.2037037	215.7872981	206.4758958	35.72780794	9.311402346	0.640830094
20160322_MKY0532_05	53.998	242.9444444	215.8677799	206.5276873	36.41675715	9.340092611	0.652765539
20160322_MKY0532_05	54.201	243.1018519	215.7758007	206.5889251	36.51292677	9.186875631	0.667304313
20160322_MKY0532_05	54.404	242.4861111	215.6567205	206.495114	35.9909971	9.161606497	0.658444248
20160322_MKY0532_05	54.607	242.5324074	215.6077197	206.5680782	35.96432923	9.039641506	0.668083604
20160322_MKY0532_05	54.81	242.462963	215.5789762	206.4322476	36.03071541	9.146728627	0.660511081
20160322_MKY0532_05	55.013	242.6111111	215.5039693	206.3983713	36.21273978	9.105598004	0.667787546
20160322_MKY0532_05	55.216	242.4768519	215.5028744	206.495114	35.98173785	9.007760343	0.671167547
20160322_MKY0532_05	55.419	241.4351852	215.5250479	206.57557	34.85961515	8.949477873	0.65203076
20160322_MKY0532_05	55.622	241.6481481	215.5395565	206.5635179	35.08463023	8.976038614	0.654638758
20160322_MKY0532_05	55.825	242.2083333	215.4834383	206.5149837	35.69334962	8.968454557	0.668346404
20160322_MKY0532_05	56.028	241.8425926	215.5844511	206.4710098	35.37158282	9.113441364	0.649353489
20160322_MKY0532_05	56.231	242.0972222	215.5795237	206.5456026	35.55161962	9.033921073	0.659770826
20160322_MKY0532_05	56.434	242.3657407	215.5808924	206.5485342	35.81720654	9.032358215	0.66556459
20160322_MKY0532_05	56.637	242.9861111	215.7153025	206.4514658	36.53464531	9.263836693	0.66139706
20160322_MKY0532_05	56.84	242.5	215.6285245	206.4247557	36.0752443	9.2037688	0.656741325
20160322_MKY0532_05	57.043	243.1574074	215.6326307	206.5120521	36.64535529	9.120578597	0.67566423
20160322_MKY0532_05	57.246	243.2453704	215.6687654	206.4019544	36.84341597	9.266811001	0.667570087
20160322_MKY0532_05	57.449	243.2777778	215.4557898	206.5074919	36.77028592	8.948297905	0.693250148
20160322_MKY0532_05	57.652	242.7083333	215.5584451	206.5433225	36.16501086	9.015122638	0.674454386
20160322_MKY0532_05	57.855	242.3425926	215.684369	206.4338762	35.90871637	9.250492791	0.649461789
20160322_MKY0532_05	58.058	242.2962963	215.4341637	206.6631922	35.63310411	8.770971519	0.684280585
20160322_MKY0532_05	58.261	242.1388889	215.5269641	206.5407166	35.59817228	8.986247527	0.664789114
20160322_MKY0532_05	58.464	241.5509259	215.4232138	206.4465798	35.10434612	8.976633992	0.655011808
20160322_MKY0532_05	58.667	241.0462963	215.4382699	206.5374593	34.50883701	8.900810632	0.648542736
20160322_MKY0532_05	58.87	240.5740741	215.348207	206.4993485	34.07472554	8.848858419	0.643478616
20160322_MKY0532_05	59.073	241.587963	215.4642759	206.3876222	35.20034081	9.076653788	0.648749647
20160322_MKY0532_05	59.276	241.2777778	215.3925541	206.528013	34.74976475	8.864541036	0.65683177
20160322_MKY0532_05	59.479	241.2037037	215.3914591	206.4869707	34.71673302	8.904488391	0.652730598
20160322_MKY0532_05	59.682	241.6342593	215.4234875	206.4452769	35.18898239	8.978210671	0.656694982
20160322_MKY0532_05	59.885	241.0972222	215.4525048	206.6052117	34.4920105	8.847293065	0.652692942
20160322_MKY0532_05	60.088	240.662037	215.4048727	206.5071661	34.15487091	8.897706583	0.641142019
20160322_MKY0532_05	60.291	241.1481481	215.3572406	206.5045603	34.64358789	8.852680363	0.655533452
20160322_MKY0532_05	60.494	240.1296296	215.3306871	206.5039088	33.62572084	8.826778311	0.635537387
20160322_MKY0532_05	60.697	240.0648148	215.3301396	206.5114007	33.55341416	8.81873896	0.634627179
20160322_MKY0532_05	60.9	240.625	215.4437449	206.4960912	34.1289088	8.947653662	0.636456675
20160322_MKY0532_05	61.103	240.6666667	215.3495757	206.5833876	34.08327904	8.766188069	0.65066006
20160322_MKY0532_05	61.306	240.8009259	215.3802354	206.4840391	34.31688684	8.896196335	0.64477476
20160322_MKY0532_05	61.509	240.7685185	215.3837941	206.5423453	34.22617324	8.841448865	0.647398864
20160322_MKY0532_05	61.712	241.1990741	215.455516	206.4136808	34.78539329	9.041835232	0.642787738
20160322_MKY0532_05	61.915	240.712963	215.3024911	206.62443	34.088533	8.678061136	0.658380428
20160322_MKY0532_05	62.118	240.6203704	215.2236518	206.5775244	34.04284594	8.646127363	0.660156814
20160322_MKY0532_05	62.321	240.537037	215.2838763	206.5452769	33.99176016	8.738599393	0.65100709
20160322_MKY0532_05	62.524	240.6805556	215.2789488	206.5482085	34.13234709	8.73074034	0.65478244
20160322_MKY0532_05	62.727	240.5	215.3479332	206.5042345	33.99576547	8.843698678	0.642191844
20160322_MKY0532_05	62.93	240.962963	215.4270463	206.4387622	34.52420075	8.988284048	0.641605625
20160322_MKY0532_05	63.133	241.2222222	215.4048727	206.514658	34.70756424	8.890214727	0.653737479
20160322_MKY0532_05	63.336	241.8842593	215.4713934	206.409772	35.47448727	9.061621388	0.655814858
20160322_MKY0532_05	63.539	241.6388889	215.2137969	206.4798046	35.15908433	8.733992319	0.677141215
20160322_MKY0532_05	63.742	240.7731481	215.4114427	206.4986971	34.27445108	8.912745582	0.642478459
20160322_MKY0532_05	63.945	241.0092593	215.315631	206.3885993	34.62065991	8.927031639	0.648761977
20160322_MKY0532_05	64.148	240.5462963	215.1147002	206.4498371	34.09645916	8.664863112	0.659708837
20160322_MKY0532_05	64.351	240.537037	215.1650698	206.4667752	34.07026179	8.698294562	0.656216223
20160322_MKY0532_05	64.554	241.1064815	215.2745688	206.4872964	34.61918506	8.787272431	0.66060831
20160322_MKY0532_05	64.757	240.1944444	215.2868875	206.4218241	33.77262034	8.865063386	0.635560242
20160322_MKY0532_05	64.96	239.2962963	215.0993704	206.404886	32.8914103	8.694484388	0.63043552
20160322_MKY0532_05	65.163	238.9166667	215.1207227	206.4775244	32.43914224	8.643198264	0.624681369
20160322_MKY0532_05	65.366	240.1944444	215.2532165	206.5156352	33.67880927	8.737581355	0.644196776
20160322_MKY0532_05	65.569	240.3796296	215.1886121	206.5478827	33.83174689	8.640729364	0.65592563
20160322_MKY0532_05	65.772	240.2314815	215.1812209	206.4661238	33.7653577	8.715097135	0.648024335
20160322_MKY0532_05	65.975	240.3333333	215.1535724	206.4439739	33.88935939	8.709598465	0.651237229
20160322_MKY0532_05	66.178	240.2407407	215.1338626	206.5188925	33.72184823	8.614970071	0.655723521
20160322_MKY0532_05	66.381	239.4490741	215.1141528	206.4527687	32.99630534	8.661384021	0.635551975
20160322_MKY0532_05	66.584	239.3657407	214.9635916	206.613355	32.75238569	8.35023652	0.657263945
20160322_MKY0532_05	66.787	240.1898148	215.1023816	206.4003257	33.78948908	8.702055871	0.649676548
20160322_MKY0532_05	66.99	240.6111111	215.1601423	206.3185668	34.29254434	8.841575574	0.648833826
20160322_MKY0532_05	67.193	238.8888889	215.0076649	206.4439739	32.44491495	8.563690992	0.631521664
20160322_MKY0532_05	67.396	238.6064815	214.8913222	206.4840391	32.12244239	8.407283113	0.63770877
20160322_MKY0532_05	67.599	238.7731481	215.0544758	206.2605863	32.51256183	8.793889454	0.613903688
20160322_MKY0532_05	67.802	239.0046296	214.966329	206.4654723	32.53915732	8.500856732	0.639049676
20160322_MKY0532_05	68.005	239.4259259	215.0353134	206.4788274	32.94709856	8.556486079	0.643438672
20160322_MKY0532_05	68.208	239.2175926	215.0150561	206.4788274	32.73876523	8.536228756	0.640498339
20160322_MKY0532_05	68.411	239.3472222	215.0479058	206.5664495	32.78077271	8.48145632	0.646221968
20160322_MKY0532_05	68.614	238.8333333	214.9444292	206.3990228	32.43431053	8.545406435	0.63284385
20160322_MKY0532_05	68.817	238.8425926	214.8302765	206.4641694	32.37842321	8.366107104	0.647222713
20160322_MKY0532_05	69.02	239.212963	214.9649603	206.5537459	32.65921703	8.411214379	0.649654697
20160322_MKY0532_05	69.223	238.712963	214.9611278	206.5765472	32.13641573	8.384580609	0.640022031
20160322_MKY0532_05	69.426	239.0092593	215.0188886	206.4390879	32.57017131	8.579800637	0.632963188
20160322_MKY0532_05	69.629	238.9675926	215.0383247	206.4403909	32.52720171	8.597933786	0.630458911
20160322_MKY0532_05	69.832	239.6898148	215.2633452	206.4570033	33.23281156	8.806341939	0.628647601
20160322_MKY0532_05	70.035	239.8472222	215.1045716	206.4162866	33.43093558	8.68828494	0.642914238
20160322_MKY0532_05	70.238	238.6666667	214.9772789	206.4885993	32.17806732	8.4886796	0.631915167
20160322_MKY0532_05	70.441	238.2361111	214.8516288	206.4091205	31.82699059	8.442508277	0.627899207
20160322_MKY0532_05	70.644	238.3287037	214.9756365	206.4257329	31.9029708	8.549903564	0.620491324
20160322_MKY0532_05	70.847	238.0462963	214.9452505	206.4410423	31.60525395	8.504208134	0.617610618
20160322_MKY0532_05	71.05	237.9166667	214.9214344	206.5557003	31.36096634	8.365734111	0.62383391
20160322_MKY0532_05	71.253	237.9768519	214.8302765	206.4944625	31.48238931	8.335813944	0.629230399
20160322_MKY0532_05	71.456	238	214.8836573	206.5042345	31.49576547	8.37942274	0.625752587
20160322_MKY0532_05	71.659	237.8194444	214.9047358	206.3644951	31.45494933	8.54024072	0.611201583
20160322_MKY0532_05	71.862	237.8009259	214.746236	206.3472313	31.45369466	8.3990047	0.623100308
20160322_MKY0532_05	72.065	238.1759259	214.8978921	206.467101	31.70882495	8.430791166	0.626208999
20160322_MKY0532_05	72.268	237.2453704	214.855735	206.3006515	30.9447189	8.555083546	0.598485335
20160322_MKY0532_05	72.471	237.0138889	214.6939502	206.4384365	30.57545241	8.255513696	0.615148463
20160322_MKY0532_05	72.674	237.2824074	214.8811935	206.4762215	30.80618591	8.404972042	0.607752094
20160322_MKY0532_05	72.877	238.3796296	214.8072817	206.5403909	31.83923875	8.266890807	0.643607298
20160322_MKY0532_05	73.08	238.662037	214.8007117	206.5762215	32.08581554	8.224490246	0.653204825
20160322_MKY0532_05	73.283	238.087963	214.8135779	206.4664495	31.62151345	8.34712837	0.631454311
20160322_MKY0532_05	73.486	238.2268519	214.9009034	206.4208469	31.80600495	8.480056461	0.624208026
20160322_MKY0532_05	73.689	237.8518519	214.7454147	206.3846906	31.4671613	8.360724174	0.626712601
20160322_MKY0532_05	73.892	237.6296296	214.8141254	206.5267101	31.10291953	8.287415278	0.624660015
20160322_MKY0532_05	74.095	237.0787037	214.7010676	206.4947883	30.58391543	8.206279342	0.619626277
20160322_MKY0532_05	74.298	237.6157407	214.7946893	206.4710098	31.14473097	8.323679524	0.62247849
20160322_MKY0532_05	74.501	238.0092593	214.938133	206.4977199	31.51153939	8.440413171	0.620881926
20160322_MKY0532_05	74.704	237.8009259	214.8248015	206.4009772	31.39994873	8.423824334	0.61974668
20160322_MKY0532_05	74.907	238.5092593	214.831919	206.3420195	32.16723971	8.489899427	0.63156467
20160322_MKY0532_05	75.11	238.3518519	214.7218724	206.5885993	31.7632525	8.133273085	0.653993264
20160322_MKY0532_05	75.313	238.0138889	214.6772516	206.476873	31.53701592	8.20037861	0.642525687
20160322_MKY0532_05	75.516	237.9074074	214.8472488	206.5635179	31.34388949	8.283730922	0.630583561
20160322_MKY0532_05	75.719	237.8611111	214.7758007	206.4214984	31.43961274	8.354302341	0.626634714
20160322_MKY0532_05	75.922	238.4166667	214.6986039	206.4198697	31.99679696	8.27873418	0.64621136
20160322_MKY0532_05	76.125	238.6574074	214.7210512	206.4084691	32.24893835	8.312582136	0.649022052
20160322_MKY0532_05	76.328	237.5324074	214.7177662	206.3228013	31.2096061	8.394964917	0.617847965
20160322_MKY0532_05	76.531	238.337963	214.6129209	206.4074919	31.93047111	8.20542903	0.65130419
20160322_MKY0532_05	76.734	238.8888889	214.6014235	206.5110749	32.37781397	8.090348569	0.672612478
20160322_MKY0532_05	76.937	238.7268519	214.7254312	206.4618893	32.2649626	8.263541901	0.653829318
20160322_MKY0532_05	77.14	238.5	214.6611005	206.5084691	31.99153094	8.15263141	0.657599796
20160322_MKY0532_05	77.343	238.6712963	214.7695045	206.4087948	32.26250151	8.360709729	0.645033726
20160322_MKY0532_05	77.546	238.2592593	214.6912127	206.4384365	31.82082278	8.25277622	0.644446088
20160322_MKY0532_05	77.749	237.0324074	214.6178483	206.5172638	30.51514356	8.1005845	0.627356082
20160322_MKY0532_06	-3.857	342.920904	238.5794224	208.6181135	134.3027904	29.96130886	0.969348552
20160322_MKY0532_06	-3.654	342.9378531	237.7475503	208.4866444	134.4512087	29.26090588	0.997855012
20160322_MKY0532_06	-3.451	342.4632768	237.4473956	208.4540902	134.0091867	28.99330541	1.004746207
20160322_MKY0532_06	-3.248	343.3672316	237.2867457	208.2191152	135.1481164	29.06763055	1.011687993
20160322_MKY0532_06	-3.045	342.8587571	237.1779268	208.2575125	134.6012445	28.92041425	1.012895017
20160322_MKY0532_06	-2.842	341.2372881	236.8403816	208.3192821	132.918006	28.5210995	1.014453819
20160322_MKY0532_06	-2.639	340.6949153	236.6340897	208.2157763	132.479139	28.41831344	1.014812242
20160322_MKY0532_06	-2.436	340.6271186	236.7560598	208.2024207	132.4246979	28.55363912	1.00872367
20160322_MKY0532_06	-2.233	339.4124294	236.7008767	208.0409015	131.3715279	28.65997524	0.995036132
[truncated: 13,494 more rows]
