# Supplementary material for: Condensation of Ede1 promotes the initiation of endocytosis
Source: eLife. 2022 Apr 12;11:e72865. doi: 10.7554/eLife.72865 (PMC9064294; doi:10.7554/eLife.72865)
Supplement: Figure 2—source data 2. [file elife-72865-fig2-data2.csv]

id	time	channel	intensity	normalized
20170421_MKY0381_03_patch02	-13.78	GFP	1676.53125	1.469352286
20170421_MKY0381_03_patch02	-13.25	GFP	1500.3125	1.277722758
20170421_MKY0381_03_patch02	-12.72	GFP	1510.625	1.288937112
20170421_MKY0381_03_patch02	-12.19	GFP	1383.0625	1.150218947
20170421_MKY0381_03_patch02	-11.66	GFP	1487.4375	1.263721806
20170421_MKY0381_03_patch02	-11.13	GFP	1430.8125	1.202144806
20170421_MKY0381_03_patch02	-10.6	GFP	1511.4375	1.289820667
20170421_MKY0381_03_patch02	-10.07	GFP	1492.8125	1.269566864
20170421_MKY0381_03_patch02	-9.54	GFP	1435.21875	1.206936394
20170421_MKY0381_03_patch02	-9.01	GFP	1483.84375	1.259813774
20170421_MKY0381_03_patch02	-8.48	GFP	1456	1.229535017
20170421_MKY0381_03_patch02	-7.95	GFP	1359.28125	1.124357966
20170421_MKY0381_03_patch02	-7.42	GFP	1356.21875	1.121027643
20170421_MKY0381_03_patch02	-6.89	GFP	1448.3125	1.221175226
20170421_MKY0381_03_patch02	-6.36	GFP	1384.28125	1.15154428
20170421_MKY0381_03_patch02	-5.83	GFP	1325.40625	1.087520511
20170421_MKY0381_03_patch02	-5.3	GFP	1235.96875	0.990261474
20170421_MKY0381_03_patch02	-4.77	GFP	1235.96875	0.990261474
20170421_MKY0381_03_patch02	-4.24	GFP	863.15625	0.584845572
20170421_MKY0381_03_patch02	-3.71	GFP	1312.46875	1.073451594
20170421_MKY0381_03_patch02	-3.18	GFP	1280.4375	1.038619129
20170421_MKY0381_03_patch02	-2.65	GFP	1220.09375	0.972998165
20170421_MKY0381_03_patch02	-2.12	GFP	1299.1875	1.059008865
20170421_MKY0381_03_patch02	-1.59	GFP	1354.78125	1.11946443
20170421_MKY0381_03_patch02	-1.06	GFP	1384.34375	1.151612245
20170421_MKY0381_03_patch02	-0.53	GFP	1384.34375	1.151612245
20170421_MKY0381_03_patch02	0	GFP	325.34375	0
20170421_MKY0381_03_patch02	0.53	GFP	426.78125	0.110308468
20170421_MKY0381_03_patch02	1.06	GFP	499.25	0.189114794
20170421_MKY0381_03_patch02	1.59	GFP	571.1875	0.267343412
20170421_MKY0381_03_patch02	2.12	GFP	778.71875	0.493023798
20170421_MKY0381_03_patch02	2.65	GFP	616.28125	0.316380725
20170421_MKY0381_03_patch02	3.18	GFP	644.90625	0.347509054
20170421_MKY0381_03_patch02	3.71	GFP	788.875	0.504068238
20170421_MKY0381_03_patch02	4.24	GFP	806.21875	0.522928743
20170421_MKY0381_03_patch02	4.77	GFP	429.3125	0.113061082
20170421_MKY0381_03_patch02	5.3	GFP	844.4375	0.56448982
20170421_MKY0381_03_patch02	5.83	GFP	938.84375	0.667152137
20170421_MKY0381_03_patch02	6.36	GFP	829.65625	0.548415912
20170421_MKY0381_03_patch02	6.89	GFP	800.15625	0.516336062
20170421_MKY0381_03_patch02	7.42	GFP	835.375	0.554634781
20170421_MKY0381_03_patch02	7.95	GFP	835.375	0.554634781
20170421_MKY0381_03_patch02	8.48	GFP	834.90625	0.554125038
20170421_MKY0381_03_patch02	9.01	GFP	810.125	0.527176604
20170421_MKY0381_03_patch02	9.54	GFP	816.34375	0.5339392
20170421_MKY0381_03_patch02	10.07	GFP	870.1875	0.592491723
20170421_MKY0381_03_patch02	10.6	GFP	746.25	0.457715573
20170421_MKY0381_03_patch02	11.13	GFP	847.75	0.568092006
20170421_MKY0381_03_patch02	11.66	GFP	828.875	0.547566339
20170421_MKY0381_03_patch02	12.19	GFP	838.125	0.557625276
20170421_MKY0381_03_patch02	12.72	GFP	818.78125	0.536589865
20170421_MKY0381_03_patch02	13.25	GFP	1017.21875	0.75238123
20170421_MKY0381_03_patch02	13.78	GFP	1120.40625	0.864592739
20170421_MKY0381_03_patch02	14.31	GFP	1035.59375	0.77236317
20170421_MKY0381_03_patch02	14.84	GFP	1071.5	0.811409513
20170421_MKY0381_03_patch02	15.37	GFP	1060.90625	0.799889313
20170421_MKY0381_03_patch02	15.9	GFP	1070.84375	0.810695873
20170421_MKY0381_03_patch02	16.43	GFP	1141.5625	0.887599157
20170421_MKY0381_03_patch02	16.96	GFP	1106.5625	0.849538318
20170421_MKY0381_03_patch02	17.49	GFP	1067.78125	0.807365549
20170421_MKY0381_03_patch02	18.02	GFP	1050.75	0.788844873
20170421_MKY0381_03_patch02	18.55	GFP	923.5	0.650466537
20170421_MKY0381_03_patch02	19.08	GFP	1132.03125	0.877234375
20170421_MKY0381_03_patch02	19.61	GFP	935.59375	0.663617916
20170421_MKY0381_03_patch02	20.14	GFP	1066.875	0.806380045
20170421_MKY0381_03_patch02	20.67	GFP	913.59375	0.63969396
20170421_MKY0381_03_patch02	21.2	GFP	896.5	0.621105318
20170421_MKY0381_03_patch02	21.73	GFP	967.46875	0.698280466
20170421_MKY0381_03_patch02	22.26	GFP	995.34375	0.728593205
20170421_MKY0381_03_patch02	22.79	GFP	1061.8125	0.800874817
20170421_MKY0381_03_patch02	23.32	GFP	1043.53125	0.780994825
20170421_MKY0381_03_patch02	23.85	GFP	936.6875	0.664807317
20170421_MKY0381_03_patch02	24.38	GFP	1093.0625	0.834857709
20170421_MKY0381_03_patch02	24.91	GFP	990.28125	0.723087977
20170421_MKY0381_03_patch02	25.44	GFP	1038.25	0.775251716
20170421_MKY0381_03_patch02	25.97	GFP	1042.65625	0.780043304
20170421_MKY0381_03_patch02	26.5	GFP	925.875	0.653049236
20170421_MKY0381_03_patch02	27.03	GFP	1086.25	0.827449438
20170421_MKY0381_03_patch02	27.56	GFP	1099.59375	0.841960133
20170421_MKY0381_03_patch02	28.09	GFP	1223.40625	0.976600351
20170421_MKY0381_03_patch02	28.62	GFP	1180.21875	0.929635995
20170421_MKY0381_03_patch02	29.15	GFP	1320	1.081641471
20170421_MKY0381_03_patch02	29.68	GFP	1094.5	0.836420922
20170421_MKY0381_03_patch02	30.21	GFP	915.25	0.641495053
20170421_MKY0381_03_patch02	30.74	GFP	1099.6875	0.842062082
20170421_MKY0381_03_patch02	31.27	GFP	1188.65625	0.938811376
20170421_MKY0381_03_patch02	31.8	GFP	1088.71875	0.830134087
20170421_MKY0381_03_patch02	32.33	GFP	1104.0625	0.846819687
20170421_MKY0381_03_patch02	32.86	GFP	1100.125	0.842537842
20170421_MKY0381_03_patch02	33.39	GFP	1182.125	0.931708951
20170421_MKY0381_03_patch02	33.92	GFP	1306.5	1.066960861
20170421_MKY0381_03_patch02	34.45	GFP	1340.625	1.10407018
20170421_MKY0381_03_patch02	34.98	GFP	1209.46875	0.961443982
20170421_MKY0381_03_patch02	35.51	GFP	1146	0.892424728
20170421_MKY0381_03_patch02	36.04	GFP	1200.8125	0.952030721
20170421_MKY0381_03_patch02	36.57	GFP	1044.46875	0.782014312
20170421_MKY0381_03_patch02	37.1	GFP	1023.09375	0.758770013
20170421_MKY0381_03_patch02	37.63	GFP	1158.28125	0.905780004
20170421_MKY0381_03_patch02	38.16	GFP	1017.5	0.752687076
20170421_MKY0381_03_patch02	38.69	GFP	1219.90625	0.972794268
20170421_MKY0381_03_patch02	39.22	GFP	1071.71875	0.811647394
20170421_MKY0381_03_patch02	39.75	GFP	1213.40625	0.965725826
20170421_MKY0381_03_patch02	40.28	GFP	1223.90625	0.977144078
20170421_MKY0381_03_patch02	40.81	GFP	1332.90625	1.095676405
20170421_MKY0381_03_patch02	41.34	GFP	1486.4375	1.262634354
20170421_MKY0381_03_patch02	41.87	GFP	1304.15625	1.064412145
20170421_MKY0381_03_patch02	42.4	GFP	1492.78125	1.269532881
20170421_MKY0381_03_patch02	42.93	GFP	1256.84375	1.012962046
20170421_MKY0381_03_patch02	43.46	GFP	1342.4375	1.106041187
20170421_MKY0381_03_patch02	43.99	GFP	1205.40625	0.957026206
20170421_MKY0381_03_patch02	44.52	GFP	1231.75	0.985673784
20170421_MKY0381_03_patch02	45.05	GFP	1212.25	0.964468459
20170421_MKY0381_03_patch02	45.58	GFP	1043.9375	0.781436602
20170421_MKY0381_03_patch02	46.11	GFP	1151.21875	0.898099871
20170421_MKY0381_03_patch02	46.64	GFP	1229.78125	0.983532861
20170421_MKY0381_03_patch02	47.17	GFP	1030.34375	0.766654044
20170421_MKY0381_03_patch02	47.7	GFP	1203.5	0.954953249
20170421_MKY0381_03_patch02	48.23	GFP	1055.5	0.794010273
20170421_MKY0381_03_patch02	48.76	GFP	1228.8125	0.982479392
20170421_MKY0381_03_patch02	49.29	GFP	1151.9375	0.898881477
20170421_MKY0381_03_patch02	49.82	GFP	995.1875	0.728423291
20170421_MKY0381_03_patch02	50.35	GFP	972.625	0.703887643
20170421_MKY0381_03_patch02	50.88	GFP	1145.15625	0.89150719
20170421_MKY0381_03_patch02	51.41	GFP	1113.28125	0.85684464
20170421_MKY0381_03_patch02	51.94	GFP	964.90625	0.695493869
20170421_MKY0381_03_patch02	52.47	GFP	992.71875	0.725738642
20170421_MKY0381_03_patch02	53	GFP	1163.75	0.911727011
20170421_MKY0381_03_patch02	53.53	GFP	1041.28125	0.778548057
20170421_MKY0381_03_patch02	54.06	GFP	929.40625	0.656889303
20170421_MKY0381_03_patch02	54.59	GFP	1122.3125	0.866665696
20170421_MKY0381_03_patch02	55.12	GFP	1089.34375	0.830813745
20170421_MKY0381_03_patch02	55.65	GFP	1020.5	0.755949433
20170421_MKY0381_03_patch02	56.18	GFP	1162.78125	0.910673541
20170421_MKY0381_03_patch02	56.71	GFP	1116.53125	0.860378861
20170421_MKY0381_03_patch02	57.24	GFP	1303.625	1.063834435
20170421_MKY0381_03_patch02	57.77	GFP	1320	1.081641471
20170421_MKY0381_03_patch02	58.3	GFP	1242.40625	0.99726195
20170421_MKY0381_03_patch02	58.83	GFP	1294.28125	1.053673551
20170421_MKY0381_03_patch02	59.36	GFP	1126.03125	0.87070966
20170421_MKY0381_03_patch02	59.89	GFP	1117.0625	0.86095657
20170421_MKY0381_03_patch02	60.42	GFP	1120.46875	0.864660705
20170421_MKY0381_03_patch02	60.95	GFP	1358.9375	1.123984154
20170421_MKY0381_03_patch02	61.48	GFP	1395.03125	1.163234395
20170421_MKY0381_03_patch02	62.01	GFP	1517.59375	1.296515297
20170421_MKY0381_03_patch02	62.54	GFP	1466.5	1.240953269
20170421_MKY0381_03_patch02	63.07	GFP	1474.25	1.249381026
20170421_MKY0381_03_patch02	63.6	GFP	1241.84375	0.996650258
20170421_MKY0381_03_patch02	64.13	GFP	1211.71875	0.96389075
20170421_MKY0381_03_patch02	64.66	GFP	930.8125	0.658418533
20170421_MKY0381_03_patch02	65.19	GFP	1012.75	0.747521676
20170421_MKY0381_03_patch02	65.72	GFP	1076.4375	0.81677881
20170421_MKY0381_03_patch02	66.25	GFP	1044.40625	0.781946346
20170421_MKY0381_03_patch02	66.78	GFP	1162.96875	0.910877438
20170421_MKY0381_03_patch02	67.31	GFP	1167.5625	0.915872923
20170421_MKY0381_03_patch02	67.84	GFP	1338.0625	1.101283582
20170421_MKY0381_03_patch02	68.37	GFP	1421.15625	1.191644092
20170421_MKY0381_03_patch02	68.9	GFP	1307.5625	1.06811628
20170421_MKY0381_03_patch02	69.43	GFP	1162.1875	0.910027866
20170421_MKY0381_03_patch02	69.96	GFP	1284.84375	1.043410717
20170421_MKY0381_03_patch02	70.49	GFP	1305.03125	1.065363665
20170421_MKY0381_03_patch02	71.02	GFP	1265.5625	1.022443273
20170421_MKY0381_03_patch02	71.55	GFP	1050	0.788029284
20170421_MKY0381_03_patch02	72.08	GFP	1118.875	0.862927578
20170421_MKY0381_03_patch02	72.61	GFP	1106.4375	0.849402387
20170421_MKY0381_03_patch02	73.14	GFP	1081.625	0.82241997
20170421_MKY0381_03_patch02	73.67	GFP	1234.5625	0.988732244
20170421_MKY0381_03_patch02	74.2	GFP	1121.3125	0.865578243
20170421_MKY0381_03_patch02	74.73	GFP	1079.5625	0.820177099
20170421_MKY0381_03_patch02	75.26	GFP	1330.15625	1.092685911
20170421_MKY0381_03_patch02	75.79	GFP	1328.53125	1.0909188
20170421_MKY0381_03_patch02	76.32	GFP	1352.6875	1.117187576
20170421_MKY0381_03_patch02	76.85	GFP	1237.28125	0.991688756
20170421_MKY0381_03_patch02	77.38	GFP	1239.46875	0.994067558
20170421_MKY0381_03_patch02	77.91	GFP	1166.5	0.914717505
20170421_MKY0381_03_patch02	78.44	GFP	1248.625	1.004024545
20170421_MKY0381_03_patch02	78.97	GFP	1286.6875	1.045415708
20170421_MKY0381_03_patch02	79.5	GFP	1333.75	1.096593943
20170421_MKY0381_03_patch02	80.03	GFP	1275.8125	1.033589661
20170421_MKY0381_03_patch02	80.56	GFP	1364.40625	1.12993116
20170421_MKY0381_03_patch02	81.09	GFP	1487.0625	1.263314012
20170421_MKY0381_03_patch02	81.62	GFP	1340.84375	1.10430806
20170421_MKY0381_03_patch02	82.15	GFP	1370.8125	1.136897653
20170421_MKY0381_03_patch02	82.68	GFP	1192.59375	0.94309322
20170421_MKY0381_03_patch02	83.21	GFP	1148.03125	0.894633616
20170421_MKY0381_03_patch02	83.74	GFP	1194.78125	0.945472022
20170421_MKY0381_03_patch02	84.27	GFP	1326.34375	1.088539998
20170421_MKY0381_03_patch02	84.8	GFP	1275.0625	1.032774072
20170421_MKY0381_03_patch02	85.33	GFP	1263.15625	1.01982659
20170421_MKY0381_03_patch02	85.86	GFP	1352.78125	1.117289525
20170421_MKY0381_03_patch02	86.39	GFP	1285.53125	1.044158341
20170421_MKY0381_03_patch02	86.92	GFP	1469.3125	1.244011729
20170421_MKY0381_03_patch02	87.45	GFP	1390.96875	1.158816619
20170421_MKY0381_03_patch02	87.98	GFP	1363.03125	1.128435913
20170421_MKY0381_03_patch02	88.51	GFP	1254.5625	1.010481295
20170421_MKY0381_03_patch02	89.04	GFP	1210.71875	0.962803297
20170421_MKY0381_03_patch02	89.57	GFP	1275.75	1.033521696
20170421_MKY0381_03_patch02	90.1	GFP	1331.15625	1.093773363
20170421_MKY0381_03_patch02	90.63	GFP	1262.03125	1.018603206
20170421_MKY0381_03_patch02	91.16	GFP	1297.75	1.057445652
20170421_MKY0381_03_patch02	91.69	GFP	1153.28125	0.900342742
20170421_MKY0381_03_patch02	92.22	GFP	1044.96875	0.782558038
20170421_MKY0381_03_patch02	92.75	GFP	1246.5	1.001713709
20170421_MKY0381_03_patch02	93.28	GFP	1353.28125	1.117833251
20170421_MKY0381_03_patch02	93.81	GFP	1252.5	1.008238424
20170421_MKY0381_03_patch02	94.34	GFP	1255.15625	1.01112697
20170421_MKY0381_03_patch02	94.87	GFP	1402.40625	1.171254357
20170421_MKY0381_03_patch02	95.4	GFP	1268.25	1.025365802
20170421_MKY0381_03_patch02	95.93	GFP	1346.625	1.110594895
20170421_MKY0381_03_patch02	96.46	GFP	1320.875	1.082592992
20170421_MKY0381_03_patch02	96.99	GFP	1324.625	1.086670939
20170421_MKY0381_03_patch02	97.52	GFP	1515.3125	1.294034546
20170421_MKY0381_03_patch02	98.05	GFP	1350.96875	1.115318517
20170421_MKY0381_03_patch02	98.58	GFP	1253.0625	1.008850116
20170421_MKY0381_03_patch02	99.11	GFP	1411.96875	1.181653122
20170421_MKY0381_03_patch02	99.64	GFP	1486.65625	1.262872234
20170421_MKY0381_03_patch02	100.17	GFP	1401.3125	1.170064956
20170421_MKY0381_03_patch02	100.7	GFP	1678.75	1.471765071
20170421_MKY0381_03_patch02	101.23	GFP	1614.90625	1.402338023
20170421_MKY0381_03_patch02	101.76	GFP	1437.09375	1.208975367
20170421_MKY0381_03_patch02	102.29	GFP	1203.0625	0.954477489
20170421_MKY0381_03_patch02	102.82	GFP	1194.8125	0.945506005
20170421_MKY0381_03_patch02	103.35	GFP	1222.0625	0.975139087
20170421_MKY0381_03_patch02	103.88	GFP	1169.375	0.917843931
20170421_MKY0381_03_patch02	104.41	GFP	1146.28125	0.892730574
20170421_MKY0381_03_patch02	104.94	GFP	1129.125	0.874073966
20170421_MKY0381_03_patch02	105.47	GFP	1136.6875	0.882297826
20170421_MKY0381_03_patch02	106	GFP	1281.375	1.039638616
20170421_MKY0381_03_patch02	106.53	GFP	1261.3125	1.0178216
20170421_MKY0381_03_patch02	107.06	GFP	1138.75	0.884540697
20170421_MKY0381_03_patch02	107.59	GFP	1270.96875	1.028322313
20170421_MKY0381_03_patch02	108.12	GFP	1309.65625	1.070393134
20170421_MKY0381_03_patch02	108.65	GFP	1331.96875	1.094656918
20170421_MKY0381_03_patch02	109.18	GFP	1257.1875	1.013335858
20170421_MKY0381_03_patch02	109.71	GFP	1490.375	1.266916198
20170421_MKY0381_03_patch02	110.24	GFP	1397.78125	1.166224889
20170421_MKY0381_03_patch02	110.77	GFP	1248	1.003344888
20170421_MKY0381_03_patch02	111.3	GFP	1386.5	1.153957065
20170421_MKY0381_03_patch02	111.83	GFP	1214.25	0.966643364
20170421_MKY0381_03_patch02	112.36	GFP	1107.375	0.850421873
20170421_MKY0381_03_patch02	112.89	GFP	1174.90625	0.923858903
20170421_MKY0381_03_patch02	113.42	GFP	1198.3125	0.949312089
20170421_MKY0381_03_patch02	113.95	GFP	1270.25	1.027540707
20170421_MKY0381_03_patch02	114.48	GFP	1303.5	1.063698504
20170421_MKY0381_03_patch02	115.01	GFP	1455.75	1.229263154
20170421_MKY0381_03_patch02	115.54	GFP	1242.3125	0.997160001
20170421_MKY0381_03_patch02	116.07	GFP	1451.4375	1.224573515
20170421_MKY0381_03_patch02	116.6	GFP	1469.8125	1.244555455
20170421_MKY0381_03_patch02	117.13	GFP	1423.59375	1.194294758
20170421_MKY0381_03_patch02	117.66	GFP	1475.4375	1.250672376
20170421_MKY0381_03_patch02	118.19	GFP	1264.15625	1.020914043
20170421_MKY0381_03_patch02	118.72	GFP	1309.5625	1.070291185
20170421_MKY0381_03_patch02	119.25	GFP	1358.3125	1.123304496
20170421_MKY0381_03_patch02	119.78	GFP	1206	0.957671881
20170421_MKY0381_03_patch02	120.31	GFP	1096.3125	0.83839193
20170421_MKY0381_03_patch02	120.84	GFP	1148.09375	0.894701582
20170421_MKY0381_03_patch02	121.37	GFP	853.8125	0.574684687
20170421_MKY0381_03_patch02	121.9	GFP	1157.875	0.905338227
20170421_MKY0381_03_patch02	122.43	GFP	1078.9375	0.819497442
20170421_MKY0381_03_patch02	122.96	GFP	909.59375	0.63534415
20170421_MKY0381_03_patch02	123.49	GFP	916.78125	0.643160215
20170421_MKY0381_03_patch02	124.02	GFP	931.09375	0.658724379
20170421_MKY0381_03_patch02	124.55	GFP	1094.25	0.836149059
20170421_MKY0381_03_patch02	125.08	GFP	1084.28125	0.825308516
20170421_MKY0381_03_patch02	125.61	GFP	1196.3125	0.947137184
20170421_MKY0381_03_patch02	126.14	GFP	1170	0.918523589
20170421_MKY0381_03_patch02	126.67	GFP	946.34375	0.675308031
20170421_MKY0381_03_patch02	127.2	GFP	858.5625	0.579850087
20170421_MKY0381_03_patch02	127.73	GFP	929.84375	0.657365064
20170421_MKY0381_03_patch02	128.26	GFP	1004.0625	0.738074432
20170421_MKY0381_03_patch02	128.79	GFP	1134.65625	0.880088938
20170421_MKY0381_03_patch02	129.32	GFP	1221.4375	0.974459429
20170421_MKY0381_03_patch02	129.85	GFP	1150.03125	0.896808521
20170421_MKY0381_03_patch02	130.38	GFP	1080	0.82065286
20170421_MKY0381_03_patch02	130.91	GFP	1070.09375	0.809880283
20170421_MKY0381_03_patch02	131.44	GFP	1130.5625	0.875637179
20170421_MKY0381_03_patch02	131.97	GFP	1185.90625	0.935820881
20170421_MKY0381_03_patch02	132.5	GFP	1272.59375	1.030089424
20170421_MKY0381_03_patch02	133.03	GFP	1524.78125	1.304331362
20170421_MKY0381_03_patch02	133.56	GFP	1399.6875	1.168297845
20170421_MKY0381_03_patch02	134.09	GFP	1429.25	1.200445661
20170421_MKY0381_03_patch02	134.62	GFP	1505.03125	1.282854175
20170421_MKY0381_03_patch02	135.15	GFP	1685.28125	1.478867496
20170421_MKY0381_03_patch02	135.68	GFP	1699.28125	1.494091831
20170421_MKY0381_03_patch02	136.21	GFP	1574.75	1.358670007
20170421_MKY0381_03_patch02	136.74	GFP	1526.21875	1.305894575
20170421_MKY0381_03_patch02	137.27	GFP	1345.90625	1.109813288
20170421_MKY0381_03_patch02	137.8	GFP	1364.8125	1.130372938
20170421_MKY0381_03_patch02	138.33	GFP	1388.71875	1.15636985
20170421_MKY0381_03_patch02	138.86	GFP	1331.84375	1.094520987
20170421_MKY0381_03_patch02	139.39	GFP	1133.28125	0.878593691
20170421_MKY0381_03_patch02	139.92	GFP	1376.65625	1.143252454
20170421_MKY0381_03_patch02	140.45	GFP	1221.53125	0.974561378
20170421_MKY0381_03_patch02	140.98	GFP	1140.5	0.886443739
20170421_MKY0381_03_patch02	141.51	GFP	1043.25	0.780688979
20170421_MKY0381_03_patch02	142.04	GFP	1142.875	0.889026439
20170421_MKY0381_03_patch02	142.57	GFP	1347.84375	1.111920228
20170421_MKY0381_03_patch02	143.1	GFP	1036.09375	0.772906897
20170421_MKY0381_03_patch02	143.63	GFP	1056.8125	0.795437554
20170421_MKY0381_03_patch02	144.16	GFP	1149.78125	0.896536658
20170421_MKY0381_03_patch02	144.69	GFP	1152.15625	0.899119358
20170421_MKY0381_03_patch02	-13.78	RFP	585.46875	0.899119358
20170421_MKY0381_03_patch02	-13.25	RFP	542.75	0.899119358
20170421_MKY0381_03_patch02	-12.72	RFP	550.59375	0.899119358
20170421_MKY0381_03_patch02	-12.19	RFP	505.53125	0.899119358
20170421_MKY0381_03_patch02	-11.66	RFP	451.46875	0.899119358
20170421_MKY0381_03_patch02	-11.13	RFP	445.71875	0.899119358
20170421_MKY0381_03_patch02	-10.6	RFP	473.40625	0.899119358
20170421_MKY0381_03_patch02	-10.07	RFP	519.40625	0.899119358
20170421_MKY0381_03_patch02	-9.54	RFP	422.3125	0.899119358
20170421_MKY0381_03_patch02	-9.01	RFP	457.15625	0.899119358
20170421_MKY0381_03_patch02	-8.48	RFP	462.25	0.899119358
20170421_MKY0381_03_patch02	-7.95	RFP	423.75	0.899119358
20170421_MKY0381_03_patch02	-7.42	RFP	329.59375	0.899119358
20170421_MKY0381_03_patch02	-6.89	RFP	408.8125	0.899119358
20170421_MKY0381_03_patch02	-6.36	RFP	362.5625	0.899119358
20170421_MKY0381_03_patch02	-5.83	RFP	351.65625	0.899119358
20170421_MKY0381_03_patch02	-5.3	RFP	324.375	0.899119358
20170421_MKY0381_03_patch02	-4.77	RFP	324.375	0.899119358
20170421_MKY0381_03_patch02	-4.24	RFP	337.21875	0.899119358
20170421_MKY0381_03_patch02	-3.71	RFP	397.3125	0.899119358
20170421_MKY0381_03_patch02	-3.18	RFP	350.125	0.899119358
20170421_MKY0381_03_patch02	-2.65	RFP	431.625	0.899119358
20170421_MKY0381_03_patch02	-2.12	RFP	335.46875	0.899119358
20170421_MKY0381_03_patch02	-1.59	RFP	408.03125	0.899119358
20170421_MKY0381_03_patch02	-1.06	RFP	411.15625	0.899119358
20170421_MKY0381_03_patch02	-0.53	RFP	411.15625	0.899119358
20170421_MKY0381_03_patch02	0	RFP	238.0625	0.899119358
20170421_MKY0381_03_patch02	0.53	RFP	301.3125	0.899119358
20170421_MKY0381_03_patch02	1.06	RFP	314.34375	0.899119358
20170421_MKY0381_03_patch02	1.59	RFP	315.25	0.899119358
20170421_MKY0381_03_patch02	2.12	RFP	282.5625	0.899119358
20170421_MKY0381_03_patch02	2.65	RFP	326.71875	0.899119358
20170421_MKY0381_03_patch02	3.18	RFP	309.21875	0.899119358
20170421_MKY0381_03_patch02	3.71	RFP	353.25	0.899119358
20170421_MKY0381_03_patch02	4.24	RFP	348.78125	0.899119358
20170421_MKY0381_03_patch02	4.77	RFP	208.6875	0.899119358
20170421_MKY0381_03_patch02	5.3	RFP	324.53125	0.899119358
20170421_MKY0381_03_patch02	5.83	RFP	341.6875	0.899119358
20170421_MKY0381_03_patch02	6.36	RFP	337.90625	0.899119358
20170421_MKY0381_03_patch02	6.89	RFP	298.84375	0.899119358
20170421_MKY0381_03_patch02	7.42	RFP	300.125	0.899119358
20170421_MKY0381_03_patch02	7.95	RFP	300.125	0.899119358
20170421_MKY0381_03_patch02	8.48	RFP	325.8125	0.899119358
20170421_MKY0381_03_patch02	9.01	RFP	268.4375	0.899119358
20170421_MKY0381_03_patch02	9.54	RFP	282.40625	0.899119358
20170421_MKY0381_03_patch02	10.07	RFP	306.1875	0.899119358
20170421_MKY0381_03_patch02	10.6	RFP	324.90625	0.899119358
20170421_MKY0381_03_patch02	11.13	RFP	313.75	0.899119358
20170421_MKY0381_03_patch02	11.66	RFP	265.875	0.899119358
20170421_MKY0381_03_patch02	12.19	RFP	300.03125	0.899119358
20170421_MKY0381_03_patch02	12.72	RFP	280.25	0.899119358
20170421_MKY0381_03_patch02	13.25	RFP	298.53125	0.899119358
20170421_MKY0381_03_patch02	13.78	RFP	323.34375	0.899119358
20170421_MKY0381_03_patch02	14.31	RFP	329.625	0.899119358
20170421_MKY0381_03_patch02	14.84	RFP	310.375	0.899119358
20170421_MKY0381_03_patch02	15.37	RFP	330.78125	0.899119358
20170421_MKY0381_03_patch02	15.9	RFP	304.40625	0.899119358
20170421_MKY0381_03_patch02	16.43	RFP	306.5625	0.899119358
20170421_MKY0381_03_patch02	16.96	RFP	296.03125	0.899119358
20170421_MKY0381_03_patch02	17.49	RFP	327.40625	0.899119358
20170421_MKY0381_03_patch02	18.02	RFP	343.65625	0.899119358
20170421_MKY0381_03_patch02	18.55	RFP	370.8125	0.899119358
20170421_MKY0381_03_patch02	19.08	RFP	236.4375	0.899119358
20170421_MKY0381_03_patch02	19.61	RFP	283.46875	0.899119358
20170421_MKY0381_03_patch02	20.14	RFP	359.5625	0.899119358
20170421_MKY0381_03_patch02	20.67	RFP	350.96875	0.899119358
20170421_MKY0381_03_patch02	21.2	RFP	312.96875	0.899119358
20170421_MKY0381_03_patch02	21.73	RFP	358.875	0.899119358
20170421_MKY0381_03_patch02	22.26	RFP	333.5	0.899119358
20170421_MKY0381_03_patch02	22.79	RFP	281.78125	0.899119358
20170421_MKY0381_03_patch02	23.32	RFP	300.46875	0.899119358
20170421_MKY0381_03_patch02	23.85	RFP	275.53125	0.899119358
20170421_MKY0381_03_patch02	24.38	RFP	285	0.899119358
20170421_MKY0381_03_patch02	24.91	RFP	399.65625	0.899119358
20170421_MKY0381_03_patch02	25.44	RFP	251.75	0.899119358
20170421_MKY0381_03_patch02	25.97	RFP	318.625	0.899119358
20170421_MKY0381_03_patch02	26.5	RFP	268.0625	0.899119358
20170421_MKY0381_03_patch02	27.03	RFP	239.625	0.899119358
20170421_MKY0381_03_patch02	27.56	RFP	329.84375	0.899119358
20170421_MKY0381_03_patch02	28.09	RFP	271.625	0.899119358
20170421_MKY0381_03_patch02	28.62	RFP	295.40625	0.899119358
20170421_MKY0381_03_patch02	29.15	RFP	368.71875	0.899119358
20170421_MKY0381_03_patch02	29.68	RFP	258.15625	0.899119358
20170421_MKY0381_03_patch02	30.21	RFP	336.5	0.899119358
20170421_MKY0381_03_patch02	30.74	RFP	380.59375	0.899119358
20170421_MKY0381_03_patch02	31.27	RFP	344.5625	0.899119358
20170421_MKY0381_03_patch02	31.8	RFP	333.46875	0.899119358
20170421_MKY0381_03_patch02	32.33	RFP	321.0625	0.899119358
20170421_MKY0381_03_patch02	32.86	RFP	346.625	0.899119358
20170421_MKY0381_03_patch02	33.39	RFP	388.625	0.899119358
20170421_MKY0381_03_patch02	33.92	RFP	390.625	0.899119358
20170421_MKY0381_03_patch02	34.45	RFP	347.15625	0.899119358
20170421_MKY0381_03_patch02	34.98	RFP	302.90625	0.899119358
20170421_MKY0381_03_patch02	35.51	RFP	333	0.899119358
20170421_MKY0381_03_patch02	36.04	RFP	326.96875	0.899119358
20170421_MKY0381_03_patch02	36.57	RFP	353.1875	0.899119358
20170421_MKY0381_03_patch02	37.1	RFP	321.5	0.899119358
20170421_MKY0381_03_patch02	37.63	RFP	354.21875	0.899119358
20170421_MKY0381_03_patch02	38.16	RFP	287.59375	0.899119358
20170421_MKY0381_03_patch02	38.69	RFP	379.40625	0.899119358
20170421_MKY0381_03_patch02	39.22	RFP	344.625	0.899119358
20170421_MKY0381_03_patch02	39.75	RFP	320.8125	0.899119358
20170421_MKY0381_03_patch02	40.28	RFP	320.21875	0.899119358
20170421_MKY0381_03_patch02	40.81	RFP	345.6875	0.899119358
20170421_MKY0381_03_patch02	41.34	RFP	351.125	0.899119358
20170421_MKY0381_03_patch02	41.87	RFP	387.96875	0.899119358
20170421_MKY0381_03_patch02	42.4	RFP	300.34375	0.899119358
20170421_MKY0381_03_patch02	42.93	RFP	366.34375	0.899119358
20170421_MKY0381_03_patch02	43.46	RFP	458.28125	0.899119358
20170421_MKY0381_03_patch02	43.99	RFP	335.4375	0.899119358
20170421_MKY0381_03_patch02	44.52	RFP	353.03125	0.899119358
20170421_MKY0381_03_patch02	45.05	RFP	323.84375	0.899119358
20170421_MKY0381_03_patch02	45.58	RFP	279.09375	0.899119358
20170421_MKY0381_03_patch02	46.11	RFP	341.9375	0.899119358
20170421_MKY0381_03_patch02	46.64	RFP	291.3125	0.899119358
20170421_MKY0381_03_patch02	47.17	RFP	330.375	0.899119358
20170421_MKY0381_03_patch02	47.7	RFP	261.03125	0.899119358
20170421_MKY0381_03_patch02	48.23	RFP	341.5	0.899119358
20170421_MKY0381_03_patch02	48.76	RFP	344.125	0.899119358
20170421_MKY0381_03_patch02	49.29	RFP	336.34375	0.899119358
20170421_MKY0381_03_patch02	49.82	RFP	353.125	0.899119358
20170421_MKY0381_03_patch02	50.35	RFP	329.34375	0.899119358
20170421_MKY0381_03_patch02	50.88	RFP	386	0.899119358
20170421_MKY0381_03_patch02	51.41	RFP	252.4375	0.899119358
20170421_MKY0381_03_patch02	51.94	RFP	321.28125	0.899119358
20170421_MKY0381_03_patch02	52.47	RFP	338.0625	0.899119358
20170421_MKY0381_03_patch02	53	RFP	369.5	0.899119358
20170421_MKY0381_03_patch02	53.53	RFP	356.84375	0.899119358
20170421_MKY0381_03_patch02	54.06	RFP	301.3125	0.899119358
20170421_MKY0381_03_patch02	54.59	RFP	296.34375	0.899119358
20170421_MKY0381_03_patch02	55.12	RFP	320.375	0.899119358
20170421_MKY0381_03_patch02	55.65	RFP	292.5	0.899119358
20170421_MKY0381_03_patch02	56.18	RFP	334.40625	0.899119358
20170421_MKY0381_03_patch02	56.71	RFP	372.59375	0.899119358
20170421_MKY0381_03_patch02	57.24	RFP	286.09375	0.899119358
20170421_MKY0381_03_patch02	57.77	RFP	377.71875	0.899119358
20170421_MKY0381_03_patch02	58.3	RFP	333.53125	0.899119358
20170421_MKY0381_03_patch02	58.83	RFP	395.84375	0.899119358
20170421_MKY0381_03_patch02	59.36	RFP	376.40625	0.899119358
20170421_MKY0381_03_patch02	59.89	RFP	376.875	0.899119358
20170421_MKY0381_03_patch02	60.42	RFP	375.6875	0.899119358
20170421_MKY0381_03_patch02	60.95	RFP	363.75	0.899119358
20170421_MKY0381_03_patch02	61.48	RFP	308.84375	0.899119358
20170421_MKY0381_03_patch02	62.01	RFP	353.03125	0.899119358
20170421_MKY0381_03_patch02	62.54	RFP	394.6875	0.899119358
20170421_MKY0381_03_patch02	63.07	RFP	368.40625	0.899119358
20170421_MKY0381_03_patch02	63.6	RFP	405.15625	0.899119358
20170421_MKY0381_03_patch02	64.13	RFP	394.125	0.899119358
20170421_MKY0381_03_patch02	64.66	RFP	381.53125	0.899119358
20170421_MKY0381_03_patch02	65.19	RFP	335.0625	0.899119358
20170421_MKY0381_03_patch02	65.72	RFP	335.125	0.899119358
20170421_MKY0381_03_patch02	66.25	RFP	421.21875	0.899119358
20170421_MKY0381_03_patch02	66.78	RFP	396.6875	0.899119358
20170421_MKY0381_03_patch02	67.31	RFP	383.15625	0.899119358
20170421_MKY0381_03_patch02	67.84	RFP	332.0625	0.899119358
20170421_MKY0381_03_patch02	68.37	RFP	407.28125	0.899119358
20170421_MKY0381_03_patch02	68.9	RFP	318.375	0.899119358
20170421_MKY0381_03_patch02	69.43	RFP	375.5625	0.899119358
20170421_MKY0381_03_patch02	69.96	RFP	355.34375	0.899119358
20170421_MKY0381_03_patch02	70.49	RFP	399.5625	0.899119358
20170421_MKY0381_03_patch02	71.02	RFP	338.40625	0.899119358
20170421_MKY0381_03_patch02	71.55	RFP	360.6875	0.899119358
20170421_MKY0381_03_patch02	72.08	RFP	346.90625	0.899119358
20170421_MKY0381_03_patch02	72.61	RFP	288	0.899119358
20170421_MKY0381_03_patch02	73.14	RFP	384.96875	0.899119358
20170421_MKY0381_03_patch02	73.67	RFP	339.09375	0.899119358
20170421_MKY0381_03_patch02	74.2	RFP	414.78125	0.899119358
20170421_MKY0381_03_patch02	74.73	RFP	385.96875	0.899119358
20170421_MKY0381_03_patch02	75.26	RFP	428.375	0.899119358
20170421_MKY0381_03_patch02	75.79	RFP	391.875	0.899119358
20170421_MKY0381_03_patch02	76.32	RFP	379.90625	0.899119358
20170421_MKY0381_03_patch02	76.85	RFP	343.03125	0.899119358
20170421_MKY0381_03_patch02	77.38	RFP	384.40625	0.899119358
20170421_MKY0381_03_patch02	77.91	RFP	384.9375	0.899119358
20170421_MKY0381_03_patch02	78.44	RFP	376.0625	0.899119358
20170421_MKY0381_03_patch02	78.97	RFP	372.90625	0.899119358
20170421_MKY0381_03_patch02	79.5	RFP	342.28125	0.899119358
20170421_MKY0381_03_patch02	80.03	RFP	392.28125	0.899119358
20170421_MKY0381_03_patch02	80.56	RFP	398.75	0.899119358
20170421_MKY0381_03_patch02	81.09	RFP	390.875	0.899119358
20170421_MKY0381_03_patch02	81.62	RFP	297.53125	0.899119358
20170421_MKY0381_03_patch02	82.15	RFP	359.15625	0.899119358
20170421_MKY0381_03_patch02	82.68	RFP	340.71875	0.899119358
20170421_MKY0381_03_patch02	83.21	RFP	291.09375	0.899119358
20170421_MKY0381_03_patch02	83.74	RFP	364.28125	0.899119358
20170421_MKY0381_03_patch02	84.27	RFP	345.25	0.899119358
20170421_MKY0381_03_patch02	84.8	RFP	313.09375	0.899119358
20170421_MKY0381_03_patch02	85.33	RFP	371.3125	0.899119358
20170421_MKY0381_03_patch02	85.86	RFP	380.1875	0.899119358
20170421_MKY0381_03_patch02	86.39	RFP	314.9375	0.899119358
20170421_MKY0381_03_patch02	86.92	RFP	342.46875	0.899119358
20170421_MKY0381_03_patch02	87.45	RFP	303.71875	0.899119358
20170421_MKY0381_03_patch02	87.98	RFP	342.84375	0.899119358
20170421_MKY0381_03_patch02	88.51	RFP	408.625	0.899119358
20170421_MKY0381_03_patch02	89.04	RFP	312.28125	0.899119358
20170421_MKY0381_03_patch02	89.57	RFP	359.03125	0.899119358
20170421_MKY0381_03_patch02	90.1	RFP	332.6875	0.899119358
20170421_MKY0381_03_patch02	90.63	RFP	373.90625	0.899119358
20170421_MKY0381_03_patch02	91.16	RFP	383.46875	0.899119358
20170421_MKY0381_03_patch02	91.69	RFP	350.90625	0.899119358
20170421_MKY0381_03_patch02	92.22	RFP	428.09375	0.899119358
20170421_MKY0381_03_patch02	92.75	RFP	357.71875	0.899119358
20170421_MKY0381_03_patch02	93.28	RFP	416.09375	0.899119358
20170421_MKY0381_03_patch02	93.81	RFP	376.6875	0.899119358
20170421_MKY0381_03_patch02	94.34	RFP	361.25	0.899119358
20170421_MKY0381_03_patch02	94.87	RFP	330.40625	0.899119358
20170421_MKY0381_03_patch02	95.4	RFP	358.53125	0.899119358
20170421_MKY0381_03_patch02	95.93	RFP	340.71875	0.899119358
20170421_MKY0381_03_patch02	96.46	RFP	370.3125	0.899119358
20170421_MKY0381_03_patch02	96.99	RFP	325.15625	0.899119358
20170421_MKY0381_03_patch02	97.52	RFP	352.78125	0.899119358
20170421_MKY0381_03_patch02	98.05	RFP	331.09375	0.899119358
20170421_MKY0381_03_patch02	98.58	RFP	306.25	0.899119358
20170421_MKY0381_03_patch02	99.11	RFP	341.75	0.899119358
20170421_MKY0381_03_patch02	99.64	RFP	328.96875	0.899119358
20170421_MKY0381_03_patch02	100.17	RFP	346.1875	0.899119358
20170421_MKY0381_03_patch02	100.7	RFP	422.25	0.899119358
20170421_MKY0381_03_patch02	101.23	RFP	375.90625	0.899119358
20170421_MKY0381_03_patch02	101.76	RFP	421.125	0.899119358
20170421_MKY0381_03_patch02	102.29	RFP	301.53125	0.899119358
20170421_MKY0381_03_patch02	102.82	RFP	407.15625	0.899119358
20170421_MKY0381_03_patch02	103.35	RFP	361.46875	0.899119358
20170421_MKY0381_03_patch02	103.88	RFP	412.5	0.899119358
20170421_MKY0381_03_patch02	104.41	RFP	270.4375	0.899119358
20170421_MKY0381_03_patch02	104.94	RFP	287.3125	0.899119358
20170421_MKY0381_03_patch02	105.47	RFP	367.625	0.899119358
20170421_MKY0381_03_patch02	106	RFP	407.21875	0.899119358
20170421_MKY0381_03_patch02	106.53	RFP	355.125	0.899119358
20170421_MKY0381_03_patch02	107.06	RFP	405.4375	0.899119358
20170421_MKY0381_03_patch02	107.59	RFP	415.78125	0.899119358
20170421_MKY0381_03_patch02	108.12	RFP	376.5625	0.899119358
20170421_MKY0381_03_patch02	108.65	RFP	392.90625	0.899119358
20170421_MKY0381_03_patch02	109.18	RFP	351.9375	0.899119358
20170421_MKY0381_03_patch02	109.71	RFP	331.40625	0.899119358
20170421_MKY0381_03_patch02	110.24	RFP	337.1875	0.899119358
20170421_MKY0381_03_patch02	110.77	RFP	385.5625	0.899119358
20170421_MKY0381_03_patch02	111.3	RFP	390.5625	0.899119358
20170421_MKY0381_03_patch02	111.83	RFP	279.96875	0.899119358
20170421_MKY0381_03_patch02	112.36	RFP	369.09375	0.899119358
20170421_MKY0381_03_patch02	112.89	RFP	341.84375	0.899119358
20170421_MKY0381_03_patch02	113.42	RFP	365.96875	0.899119358
20170421_MKY0381_03_patch02	113.95	RFP	357	0.899119358
20170421_MKY0381_03_patch02	114.48	RFP	310.71875	0.899119358
20170421_MKY0381_03_patch02	115.01	RFP	352.3125	0.899119358
20170421_MKY0381_03_patch02	115.54	RFP	396.875	0.899119358
20170421_MKY0381_03_patch02	116.07	RFP	373.03125	0.899119358
20170421_MKY0381_03_patch02	116.6	RFP	393.875	0.899119358
20170421_MKY0381_03_patch02	117.13	RFP	384.59375	0.899119358
20170421_MKY0381_03_patch02	117.66	RFP	367.625	0.899119358
20170421_MKY0381_03_patch02	118.19	RFP	468.5	0.899119358
20170421_MKY0381_03_patch02	118.72	RFP	390.90625	0.899119358
20170421_MKY0381_03_patch02	119.25	RFP	409.65625	0.899119358
20170421_MKY0381_03_patch02	119.78	RFP	334.6875	0.899119358
20170421_MKY0381_03_patch02	120.31	RFP	421.84375	0.899119358
20170421_MKY0381_03_patch02	120.84	RFP	394.15625	0.899119358
20170421_MKY0381_03_patch02	121.37	RFP	427.75	0.899119358
20170421_MKY0381_03_patch02	121.9	RFP	350.375	0.899119358
20170421_MKY0381_03_patch02	122.43	RFP	347.15625	0.899119358
20170421_MKY0381_03_patch02	122.96	RFP	389.5625	0.899119358
20170421_MKY0381_03_patch02	123.49	RFP	328.21875	0.899119358
20170421_MKY0381_03_patch02	124.02	RFP	329.5	0.899119358
20170421_MKY0381_03_patch02	124.55	RFP	355.34375	0.899119358
20170421_MKY0381_03_patch02	125.08	RFP	344.59375	0.899119358
20170421_MKY0381_03_patch02	125.61	RFP	382.75	0.899119358
20170421_MKY0381_03_patch02	126.14	RFP	392.875	0.899119358
20170421_MKY0381_03_patch02	126.67	RFP	379.03125	0.899119358
20170421_MKY0381_03_patch02	127.2	RFP	292.21875	0.899119358
20170421_MKY0381_03_patch02	127.73	RFP	337.28125	0.899119358
20170421_MKY0381_03_patch02	128.26	RFP	366.03125	0.899119358
20170421_MKY0381_03_patch02	128.79	RFP	347.25	0.899119358
20170421_MKY0381_03_patch02	129.32	RFP	380.5	0.899119358
20170421_MKY0381_03_patch02	129.85	RFP	347.21875	0.899119358
20170421_MKY0381_03_patch02	130.38	RFP	374.25	0.899119358
20170421_MKY0381_03_patch02	130.91	RFP	320.65625	0.899119358
20170421_MKY0381_03_patch02	131.44	RFP	408.03125	0.899119358
20170421_MKY0381_03_patch02	131.97	RFP	326.90625	0.899119358
20170421_MKY0381_03_patch02	132.5	RFP	395.71875	0.899119358
20170421_MKY0381_03_patch02	133.03	RFP	430.4375	0.899119358
20170421_MKY0381_03_patch02	133.56	RFP	366.09375	0.899119358
20170421_MKY0381_03_patch02	134.09	RFP	386.4375	0.899119358
20170421_MKY0381_03_patch02	134.62	RFP	394.03125	0.899119358
20170421_MKY0381_03_patch02	135.15	RFP	403.9375	0.899119358
20170421_MKY0381_03_patch02	135.68	RFP	444.53125	0.899119358
20170421_MKY0381_03_patch02	136.21	RFP	440.625	0.899119358
20170421_MKY0381_03_patch02	136.74	RFP	324.71875	0.899119358
20170421_MKY0381_03_patch02	137.27	RFP	419.65625	0.899119358
20170421_MKY0381_03_patch02	137.8	RFP	401.8125	0.899119358
20170421_MKY0381_03_patch02	138.33	RFP	374.40625	0.899119358
20170421_MKY0381_03_patch02	138.86	RFP	319.375	0.899119358
20170421_MKY0381_03_patch02	139.39	RFP	362.0625	0.899119358
20170421_MKY0381_03_patch02	139.92	RFP	302.71875	0.899119358
20170421_MKY0381_03_patch02	140.45	RFP	365.71875	0.899119358
20170421_MKY0381_03_patch02	140.98	RFP	283.15625	0.899119358
20170421_MKY0381_03_patch02	141.51	RFP	400.625	0.899119358
20170421_MKY0381_03_patch02	142.04	RFP	391.5625	0.899119358
20170421_MKY0381_03_patch02	142.57	RFP	388.625	0.899119358
20170421_MKY0381_03_patch02	143.1	RFP	357.4375	0.899119358
20170421_MKY0381_03_patch02	143.63	RFP	386.5625	0.899119358
20170421_MKY0381_03_patch02	144.16	RFP	329.28125	0.899119358
20170421_MKY0381_03_patch02	144.69	RFP	321.25	0.899119358
20170421_MKY0381_03_patch03	-22.26	GFP	1078.40625	0.838222009
20170421_MKY0381_03_patch03	-21.73	GFP	923.03125	0.654892056
20170421_MKY0381_03_patch03	-21.2	GFP	873.125	0.596006711
20170421_MKY0381_03_patch03	-20.67	GFP	806.8125	0.517763316
20170421_MKY0381_03_patch03	-20.14	GFP	870.40625	0.592798805
20170421_MKY0381_03_patch03	-19.61	GFP	899.96875	0.627680168
20170421_MKY0381_03_patch03	-19.08	GFP	997.78125	0.74309102
20170421_MKY0381_03_patch03	-18.55	GFP	912.90625	0.642945373
20170421_MKY0381_03_patch03	-18.02	GFP	937.03125	0.671410925
20170421_MKY0381_03_patch03	-17.49	GFP	849.40625	0.568020501
20170421_MKY0381_03_patch03	-16.96	GFP	907.375	0.636418945
20170421_MKY0381_03_patch03	-16.43	GFP	930.1875	0.663335853
20170421_MKY0381_03_patch03	-15.9	GFP	800.0625	0.509798861
20170421_MKY0381_03_patch03	-15.37	GFP	680.90625	0.369204108
20170421_MKY0381_03_patch03	-14.84	GFP	800.90625	0.510794418
20170421_MKY0381_03_patch03	-14.31	GFP	865.1875	0.586641102
20170421_MKY0381_03_patch03	-13.78	GFP	730.8125	0.428089453
20170421_MKY0381_03_patch03	-13.25	GFP	730.8125	0.428089453
20170421_MKY0381_03_patch03	-12.72	GFP	773.71875	0.478715363
20170421_MKY0381_03_patch03	-12.19	GFP	1036.03125	0.788222931
20170421_MKY0381_03_patch03	-11.66	GFP	942.875	0.678306078
20170421_MKY0381_03_patch03	-11.13	GFP	873	0.595859221
20170421_MKY0381_03_patch03	-10.6	GFP	978	0.719750742
20170421_MKY0381_03_patch03	-10.07	GFP	982.625	0.725207869
20170421_MKY0381_03_patch03	-9.54	GFP	1005.21875	0.751866669
20170421_MKY0381_03_patch03	-9.01	GFP	1005.21875	0.751866669
20170421_MKY0381_03_patch03	-8.48	GFP	769.03125	0.473184491
20170421_MKY0381_03_patch03	-7.95	GFP	1184.59375	0.963514684
20170421_MKY0381_03_patch03	-7.42	GFP	1098.09375	0.861451669
20170421_MKY0381_03_patch03	-6.89	GFP	1179.84375	0.957910068
20170421_MKY0381_03_patch03	-6.36	GFP	1169.4375	0.945631533
20170421_MKY0381_03_patch03	-5.83	GFP	1063.25	0.820338858
20170421_MKY0381_03_patch03	-5.3	GFP	1279.25	1.075201416
20170421_MKY0381_03_patch03	-4.77	GFP	1192.25	0.972548441
20170421_MKY0381_03_patch03	-4.24	GFP	1042.84375	0.796261131
20170421_MKY0381_03_patch03	-3.71	GFP	532.59375	0.194207334
20170421_MKY0381_03_patch03	-3.18	GFP	1319.21875	1.122361313
20170421_MKY0381_03_patch03	-2.65	GFP	1389.90625	1.205766855
20170421_MKY0381_03_patch03	-2.12	GFP	1362.5	1.173429693
20170421_MKY0381_03_patch03	-1.59	GFP	1513.71875	1.351855607
20170421_MKY0381_03_patch03	-1.06	GFP	1371.09375	1.183569624
20170421_MKY0381_03_patch03	-0.53	GFP	1371.09375	1.183569624
20170421_MKY0381_03_patch03	0	GFP	368	0
20170421_MKY0381_03_patch03	0.53	GFP	415	0.055456205
20170421_MKY0381_03_patch03	1.06	GFP	458.25	0.106487712
20170421_MKY0381_03_patch03	1.59	GFP	487.125	0.140557881
20170421_MKY0381_03_patch03	2.12	GFP	437.21875	0.081672536
20170421_MKY0381_03_patch03	2.65	GFP	504.125	0.160616508
20170421_MKY0381_03_patch03	3.18	GFP	590.3125	0.262310798
20170421_MKY0381_03_patch03	3.71	GFP	568.5	0.236573809
20170421_MKY0381_03_patch03	4.24	GFP	586.6875	0.258033591
20170421_MKY0381_03_patch03	4.77	GFP	765.65625	0.469202264
20170421_MKY0381_03_patch03	5.3	GFP	793.375	0.501908151
20170421_MKY0381_03_patch03	5.83	GFP	698.21875	0.38963146
20170421_MKY0381_03_patch03	6.36	GFP	620.53125	0.297966483
20170421_MKY0381_03_patch03	6.89	GFP	683.4375	0.372190778
20170421_MKY0381_03_patch03	7.42	GFP	669.375	0.355598164
20170421_MKY0381_03_patch03	7.95	GFP	634.34375	0.314264118
20170421_MKY0381_03_patch03	8.48	GFP	801.6875	0.511716229
20170421_MKY0381_03_patch03	9.01	GFP	788.4375	0.496082299
20170421_MKY0381_03_patch03	9.54	GFP	846.25	0.564296381
20170421_MKY0381_03_patch03	10.07	GFP	730.5625	0.427794473
20170421_MKY0381_03_patch03	10.6	GFP	825.59375	0.539923674
20170421_MKY0381_03_patch03	11.13	GFP	813.96875	0.526207113
20170421_MKY0381_03_patch03	11.66	GFP	914.6875	0.645047105
20170421_MKY0381_03_patch03	12.19	GFP	802.78125	0.513006766
20170421_MKY0381_03_patch03	12.72	GFP	696.625	0.387750963
20170421_MKY0381_03_patch03	13.25	GFP	779.0625	0.485020556
20170421_MKY0381_03_patch03	13.78	GFP	821.5625	0.535167124
20170421_MKY0381_03_patch03	14.31	GFP	741.3125	0.440478605
20170421_MKY0381_03_patch03	14.84	GFP	681.53125	0.369941557
20170421_MKY0381_03_patch03	15.37	GFP	606.90625	0.281890083
20170421_MKY0381_03_patch03	15.9	GFP	502.53125	0.158736012
20170421_MKY0381_03_patch03	16.43	GFP	482.4375	0.135027009
20170421_MKY0381_03_patch03	16.96	GFP	550.6875	0.215556498
20170421_MKY0381_03_patch03	17.49	GFP	528.59375	0.189487657
20170421_MKY0381_03_patch03	18.02	GFP	547.46875	0.211758633
20170421_MKY0381_03_patch03	18.55	GFP	570.84375	0.239339245
20170421_MKY0381_03_patch03	19.08	GFP	591.9375	0.264228167
20170421_MKY0381_03_patch03	19.61	GFP	674.25	0.36135027
20170421_MKY0381_03_patch03	20.14	GFP	654.875	0.338489335
20170421_MKY0381_03_patch03	20.67	GFP	533.5625	0.195350381
20170421_MKY0381_03_patch03	21.2	GFP	655.6875	0.339448019
20170421_MKY0381_03_patch03	21.73	GFP	663.53125	0.348703011
20170421_MKY0381_03_patch03	22.26	GFP	686.6875	0.376025516
20170421_MKY0381_03_patch03	22.79	GFP	786.875	0.494238676
20170421_MKY0381_03_patch03	23.32	GFP	846.8125	0.564960086
20170421_MKY0381_03_patch03	23.85	GFP	1020.625	0.7700448
20170421_MKY0381_03_patch03	24.38	GFP	956.46875	0.694345606
20170421_MKY0381_03_patch03	24.91	GFP	756.40625	0.458288011
20170421_MKY0381_03_patch03	25.44	GFP	806.0625	0.516878376
20170421_MKY0381_03_patch03	25.97	GFP	881.8125	0.606257259
20170421_MKY0381_03_patch03	26.5	GFP	708.34375	0.401578142
20170421_MKY0381_03_patch03	27.03	GFP	742.96875	0.442432846
20170421_MKY0381_03_patch03	27.56	GFP	830.21875	0.545380801
20170421_MKY0381_03_patch03	28.09	GFP	818.40625	0.531443004
20170421_MKY0381_03_patch03	28.62	GFP	915.96875	0.646558876
20170421_MKY0381_03_patch03	29.15	GFP	911.46875	0.64124924
20170421_MKY0381_03_patch03	29.68	GFP	912.40625	0.642355414
20170421_MKY0381_03_patch03	30.21	GFP	1039.4375	0.792242031
20170421_MKY0381_03_patch03	30.74	GFP	1023.4375	0.773363323
20170421_MKY0381_03_patch03	31.27	GFP	994.3125	0.738998175
20170421_MKY0381_03_patch03	31.8	GFP	950.90625	0.687782305
20170421_MKY0381_03_patch03	32.33	GFP	954.9375	0.692538854
20170421_MKY0381_03_patch03	32.86	GFP	942.375	0.677716119
20170421_MKY0381_03_patch03	33.39	GFP	1128.3125	0.897107354
20170421_MKY0381_03_patch03	33.92	GFP	1119.75	0.887004296
20170421_MKY0381_03_patch03	34.45	GFP	1345.03125	1.152817979
20170421_MKY0381_03_patch03	34.98	GFP	1255.8125	1.047547058
20170421_MKY0381_03_patch03	35.51	GFP	1167.5	0.94334544
20170421_MKY0381_03_patch03	36.04	GFP	1333.15625	1.138806438
20170421_MKY0381_03_patch03	36.57	GFP	1209.34375	0.992717686
20170421_MKY0381_03_patch03	37.1	GFP	1103.34375	0.867646245
20170421_MKY0381_03_patch03	37.63	GFP	1231.75	1.019155252
20170421_MKY0381_03_patch03	38.16	GFP	1164.03125	0.939252595
20170421_MKY0381_03_patch03	38.69	GFP	946.75	0.682878266
20170421_MKY0381_03_patch03	39.22	GFP	1280.71875	1.076934422
20170421_MKY0381_03_patch03	39.75	GFP	1277.96875	1.073689644
20170421_MKY0381_03_patch03	40.28	GFP	1189.15625	0.968898066
20170421_MKY0381_03_patch03	40.81	GFP	1259.1875	1.051529286
20170421_MKY0381_03_patch03	41.34	GFP	1291.09375	1.089176085
20170421_MKY0381_03_patch03	41.87	GFP	1255.25	1.046883354
20170421_MKY0381_03_patch03	42.4	GFP	1458.46875	1.286665069
20170421_MKY0381_03_patch03	42.93	GFP	1407.84375	1.226931657
20170421_MKY0381_03_patch03	43.46	GFP	1345.59375	1.153481684
20170421_MKY0381_03_patch03	43.99	GFP	1312.25	1.114138751
20170421_MKY0381_03_patch03	44.52	GFP	1483.21875	1.31586807
20170421_MKY0381_03_patch03	45.05	GFP	1503.875	1.340240777
20170421_MKY0381_03_patch03	45.58	GFP	1505.125	1.341715676
20170421_MKY0381_03_patch03	46.11	GFP	1601	1.454840434
20170421_MKY0381_03_patch03	46.64	GFP	1504.71875	1.341236334
20170421_MKY0381_03_patch03	47.17	GFP	1663.90625	1.52906473
20170421_MKY0381_03_patch03	47.7	GFP	1757.75	1.639792777
20170421_MKY0381_03_patch03	48.23	GFP	1461.15625	1.289836102
20170421_MKY0381_03_patch03	48.76	GFP	1736.375	1.614572003
20170421_MKY0381_03_patch03	49.29	GFP	1546.34375	1.390350473
20170421_MKY0381_03_patch03	49.82	GFP	1540.5	1.38345532
20170421_MKY0381_03_patch03	50.35	GFP	1694.0625	1.564646669
20170421_MKY0381_03_patch03	50.88	GFP	1723.71875	1.59963865
20170421_MKY0381_03_patch03	51.41	GFP	1605.9375	1.460666286
20170421_MKY0381_03_patch03	51.94	GFP	1452.8125	1.279991151
20170421_MKY0381_03_patch03	52.47	GFP	1504.28125	1.340720119
20170421_MKY0381_03_patch03	53	GFP	1417.375	1.238177762
20170421_MKY0381_03_patch03	53.53	GFP	1476.875	1.308382958
20170421_MKY0381_03_patch03	54.06	GFP	1600.46875	1.454213602
20170421_MKY0381_03_patch03	54.59	GFP	1495.90625	1.330838296
20170421_MKY0381_03_patch03	55.12	GFP	1519.96875	1.359230103
20170421_MKY0381_03_patch03	55.65	GFP	1498.25	1.333603731
20170421_MKY0381_03_patch03	56.18	GFP	1483.5625	1.316273668
20170421_MKY0381_03_patch03	56.71	GFP	1530.34375	1.371471765
20170421_MKY0381_03_patch03	57.24	GFP	1505.125	1.341715676
20170421_MKY0381_03_patch03	57.77	GFP	1481.5	1.313840084
20170421_MKY0381_03_patch03	58.3	GFP	1596.625	1.449678288
20170421_MKY0381_03_patch03	58.83	GFP	1501.40625	1.337327852
20170421_MKY0381_03_patch03	59.36	GFP	1499.15625	1.334673033
20170421_MKY0381_03_patch03	59.89	GFP	1394.6875	1.211408344
20170421_MKY0381_03_patch03	60.42	GFP	1342.40625	1.149720691
20170421_MKY0381_03_patch03	60.95	GFP	1224.1875	1.010232112
20170421_MKY0381_03_patch03	61.48	GFP	1303.65625	1.10399882
20170421_MKY0381_03_patch03	62.01	GFP	1186.40625	0.965653288
20170421_MKY0381_03_patch03	62.54	GFP	1339.28125	1.146033443
20170421_MKY0381_03_patch03	63.07	GFP	1236.4375	1.024686123
20170421_MKY0381_03_patch03	63.6	GFP	1284.375	1.081248502
20170421_MKY0381_03_patch03	64.13	GFP	1184.53125	0.96344094
20170421_MKY0381_03_patch03	64.66	GFP	1319.03125	1.122140079
20170421_MKY0381_03_patch03	65.19	GFP	1157.6875	0.931767482
20170421_MKY0381_03_patch03	65.72	GFP	1252.71875	1.043896683
20170421_MKY0381_03_patch03	66.25	GFP	1186.9375	0.96628012
20170421_MKY0381_03_patch03	66.78	GFP	1303.6875	1.104035693
20170421_MKY0381_03_patch03	67.31	GFP	1278.1875	1.073947752
20170421_MKY0381_03_patch03	67.84	GFP	1362.5	1.173429693
20170421_MKY0381_03_patch03	68.37	GFP	1302.0625	1.102118324
20170421_MKY0381_03_patch03	68.9	GFP	1225.59375	1.011891374
20170421_MKY0381_03_patch03	69.43	GFP	1159.84375	0.934311683
20170421_MKY0381_03_patch03	69.96	GFP	1106.15625	0.870964768
20170421_MKY0381_03_patch03	70.49	GFP	1106.15625	0.870964768
20170421_MKY0381_03_patch03	71.02	GFP	988.90625	0.732619236
20170421_MKY0381_03_patch03	71.55	GFP	1052.1875	0.807286001
20170421_MKY0381_03_patch03	72.08	GFP	960.40625	0.698991538
20170421_MKY0381_03_patch03	72.61	GFP	897.71875	0.62502535
20170421_MKY0381_03_patch03	73.14	GFP	909.375	0.638778784
20170421_MKY0381_03_patch03	73.67	GFP	1004.5625	0.751092347
20170421_MKY0381_03_patch03	74.2	GFP	1109.21875	0.874578271
20170421_MKY0381_03_patch03	74.73	GFP	1028.0625	0.778820449
20170421_MKY0381_03_patch03	75.26	GFP	1128.125	0.896886119
20170421_MKY0381_03_patch03	75.79	GFP	1034.78125	0.786748032
20170421_MKY0381_03_patch03	76.32	GFP	1027.09375	0.777677403
20170421_MKY0381_03_patch03	76.85	GFP	1213.625	0.997769215
20170421_MKY0381_03_patch03	77.38	GFP	1212.90625	0.996921148
20170421_MKY0381_03_patch03	77.91	GFP	1040.71875	0.793753802
20170421_MKY0381_03_patch03	78.44	GFP	979.34375	0.721336259
20170421_MKY0381_03_patch03	78.97	GFP	1091.59375	0.853782194
20170421_MKY0381_03_patch03	79.5	GFP	1024.59375	0.774727605
20170421_MKY0381_03_patch03	80.03	GFP	965.4375	0.704928006
20170421_MKY0381_03_patch03	80.56	GFP	1055.25	0.810899504
20170421_MKY0381_03_patch03	81.09	GFP	1082.875	0.843494773
20170421_MKY0381_03_patch03	81.62	GFP	1142.875	0.914289928
20170421_MKY0381_03_patch03	82.15	GFP	995.34375	0.740214967
20170421_MKY0381_03_patch03	82.68	GFP	898.1875	0.625578437
20170421_MKY0381_03_patch03	83.21	GFP	957.03125	0.69500931
20170421_MKY0381_03_patch03	83.74	GFP	971.125	0.711638797
20170421_MKY0381_03_patch03	84.27	GFP	916.875	0.647628178
20170421_MKY0381_03_patch03	84.8	GFP	861.4375	0.582216405
20170421_MKY0381_03_patch03	85.33	GFP	887.53125	0.613004922
20170421_MKY0381_03_patch03	85.86	GFP	845.15625	0.563005844
20170421_MKY0381_03_patch03	86.39	GFP	836.3125	0.552570933
20170421_MKY0381_03_patch03	86.92	GFP	839.9375	0.556848141
20170421_MKY0381_03_patch03	87.45	GFP	805.6875	0.516435906
20170421_MKY0381_03_patch03	87.98	GFP	848.4375	0.566877454
20170421_MKY0381_03_patch03	88.51	GFP	881.28125	0.605630427
20170421_MKY0381_03_patch03	89.04	GFP	1014.0625	0.76230158
20170421_MKY0381_03_patch03	89.57	GFP	862.4375	0.583396324
20170421_MKY0381_03_patch03	90.1	GFP	849.0625	0.567614904
20170421_MKY0381_03_patch03	90.63	GFP	751.125	0.452056562
20170421_MKY0381_03_patch03	91.16	GFP	780.15625	0.486311093
20170421_MKY0381_03_patch03	91.69	GFP	840.0625	0.556995631
20170421_MKY0381_03_patch03	92.22	GFP	956.25	0.694087498
20170421_MKY0381_03_patch03	92.75	GFP	822.09375	0.535793957
20170421_MKY0381_03_patch03	93.28	GFP	893.9375	0.62056378
20170421_MKY0381_03_patch03	93.81	GFP	888.96875	0.614701056
20170421_MKY0381_03_patch03	94.34	GFP	987.34375	0.730775613
20170421_MKY0381_03_patch03	94.87	GFP	1050.15625	0.80488929
20170421_MKY0381_03_patch03	95.4	GFP	1132.71875	0.902306373
20170421_MKY0381_03_patch03	95.93	GFP	1264.34375	1.057613245
20170421_MKY0381_03_patch03	96.46	GFP	1204.90625	0.987481794
20170421_MKY0381_03_patch03	96.99	GFP	1091.5625	0.853745322
20170421_MKY0381_03_patch03	97.52	GFP	1139.21875	0.909975849
20170421_MKY0381_03_patch03	98.05	GFP	974.96875	0.716174112
20170421_MKY0381_03_patch03	98.58	GFP	912.40625	0.642355414
20170421_MKY0381_03_patch03	99.11	GFP	938.5625	0.673217677
20170421_MKY0381_03_patch03	99.64	GFP	827.03125	0.541619808
20170421_MKY0381_03_patch03	100.17	GFP	850.78125	0.56964289
20170421_MKY0381_03_patch03	100.7	GFP	888	0.61355801
20170421_MKY0381_03_patch03	101.23	GFP	970	0.710311388
20170421_MKY0381_03_patch03	101.76	GFP	785.1875	0.492247562
20170421_MKY0381_03_patch03	102.29	GFP	934.84375	0.668829852
20170421_MKY0381_03_patch03	102.82	GFP	1015.84375	0.764403311
20170421_MKY0381_03_patch03	103.35	GFP	1013.90625	0.762117218
20170421_MKY0381_03_patch03	103.88	GFP	1016.125	0.764735163
20170421_MKY0381_03_patch03	104.41	GFP	978.09375	0.719861359
20170421_MKY0381_03_patch03	104.94	GFP	902.21875	0.630334986
20170421_MKY0381_03_patch03	105.47	GFP	1011.25	0.758983057
20170421_MKY0381_03_patch03	106	GFP	1142.96875	0.914400546
20170421_MKY0381_03_patch03	106.53	GFP	1352	1.161040541
20170421_MKY0381_03_patch03	107.06	GFP	1149.28125	0.921848786
20170421_MKY0381_03_patch03	107.59	GFP	1083.6875	0.844453458
20170421_MKY0381_03_patch03	108.12	GFP	1196.375	0.977415608
20170421_MKY0381_03_patch03	108.65	GFP	1148.8125	0.921295699
20170421_MKY0381_03_patch03	109.18	GFP	1273	1.067826921
20170421_MKY0381_03_patch03	109.71	GFP	1110.34375	0.87590568
20170421_MKY0381_03_patch03	110.24	GFP	1100.71875	0.864548957
20170421_MKY0381_03_patch03	110.77	GFP	1235.5625	1.023653694
20170421_MKY0381_03_patch03	111.3	GFP	1361.875	1.172692244
20170421_MKY0381_03_patch03	111.83	GFP	1242.625	1.031986873
20170421_MKY0381_03_patch03	112.36	GFP	1115.78125	0.882321491
20170421_MKY0381_03_patch03	112.89	GFP	1101.46875	0.865433897
20170421_MKY0381_03_patch03	113.42	GFP	1096.59375	0.859681791
20170421_MKY0381_03_patch03	113.95	GFP	1126.6875	0.895189985
20170421_MKY0381_03_patch03	114.48	GFP	1051.28125	0.8062167
20170421_MKY0381_03_patch03	115.01	GFP	1101.65625	0.865655132
20170421_MKY0381_03_patch03	115.54	GFP	1115.34375	0.881805276
20170421_MKY0381_03_patch03	116.07	GFP	1081.53125	0.841909257
20170421_MKY0381_03_patch03	116.6	GFP	961.34375	0.700097712
20170421_MKY0381_03_patch03	117.13	GFP	1176.28125	0.953706606
20170421_MKY0381_03_patch03	117.66	GFP	1268.5	1.062517284
20170421_MKY0381_03_patch03	118.19	GFP	1126.5	0.894968751
20170421_MKY0381_03_patch03	118.72	GFP	1253.96875	1.045371582
20170421_MKY0381_03_patch03	119.25	GFP	966.21875	0.705849818
20170421_MKY0381_03_patch03	119.78	GFP	987.59375	0.731070592
20170421_MKY0381_03_patch03	120.31	GFP	1038.40625	0.791025239
20170421_MKY0381_03_patch03	120.84	GFP	936.875	0.671226563
20170421_MKY0381_03_patch03	121.37	GFP	835.5625	0.551685994
20170421_MKY0381_03_patch03	121.9	GFP	944.4375	0.680149702
20170421_MKY0381_03_patch03	122.43	GFP	820.15625	0.533507863
20170421_MKY0381_03_patch03	122.96	GFP	1041.59375	0.794786232
20170421_MKY0381_03_patch03	123.49	GFP	1088.65625	0.850316181
20170421_MKY0381_03_patch03	124.02	GFP	1162.4375	0.937372099
20170421_MKY0381_03_patch03	124.55	GFP	1202.8125	0.985011338
20170421_MKY0381_03_patch03	125.08	GFP	1012.78125	0.760789808
20170421_MKY0381_03_patch03	125.61	GFP	978.09375	0.719861359
20170421_MKY0381_03_patch03	126.14	GFP	1111.875	0.877712432
20170421_MKY0381_03_patch03	126.67	GFP	1158.09375	0.932246824
20170421_MKY0381_03_patch03	127.2	GFP	1144.46875	0.916170425
20170421_MKY0381_03_patch03	127.73	GFP	1187.65625	0.967128187
20170421_MKY0381_03_patch03	128.26	GFP	919.4375	0.650651721
20170421_MKY0381_03_patch03	128.79	GFP	945.75	0.681698346
20170421_MKY0381_03_patch03	129.32	GFP	933.9375	0.66776055
20170421_MKY0381_03_patch03	129.85	GFP	1056.875	0.812816873
20170421_MKY0381_03_patch03	130.38	GFP	884.09375	0.60894895
20170421_MKY0381_03_patch03	130.91	GFP	1128.625	0.897476079
20170421_MKY0381_03_patch03	131.44	GFP	1128.84375	0.897734186
20170421_MKY0381_03_patch03	131.97	GFP	1143.875	0.915469848
20170421_MKY0381_03_patch03	132.5	GFP	1145.59375	0.917497834
20170421_MKY0381_03_patch03	133.03	GFP	1190.125	0.970041113
20170421_MKY0381_03_patch03	133.56	GFP	1092.5	0.854851496
20170421_MKY0381_03_patch03	134.09	GFP	1192.90625	0.973322763
20170421_MKY0381_03_patch03	134.62	GFP	1043	0.796445493
20170421_MKY0381_03_patch03	135.15	GFP	1026.28125	0.776718718
20170421_MKY0381_03_patch03	135.68	GFP	1136.4375	0.906694198
20170421_MKY0381_03_patch03	136.21	GFP	1191.40625	0.971552884
20170421_MKY0381_03_patch03	-22.26	RFP	348.09375	0.971552884
20170421_MKY0381_03_patch03	-21.73	RFP	277.375	0.971552884
20170421_MKY0381_03_patch03	-21.2	RFP	239.1875	0.971552884
20170421_MKY0381_03_patch03	-20.67	RFP	270.1875	0.971552884
20170421_MKY0381_03_patch03	-20.14	RFP	269.53125	0.971552884
20170421_MKY0381_03_patch03	-19.61	RFP	337.9375	0.971552884
20170421_MKY0381_03_patch03	-19.08	RFP	259.03125	0.971552884
20170421_MKY0381_03_patch03	-18.55	RFP	292.3125	0.971552884
20170421_MKY0381_03_patch03	-18.02	RFP	276.71875	0.971552884
20170421_MKY0381_03_patch03	-17.49	RFP	292.6875	0.971552884
20170421_MKY0381_03_patch03	-16.96	RFP	293.03125	0.971552884
20170421_MKY0381_03_patch03	-16.43	RFP	238.875	0.971552884
20170421_MKY0381_03_patch03	-15.9	RFP	267.75	0.971552884
20170421_MKY0381_03_patch03	-15.37	RFP	211.65625	0.971552884
20170421_MKY0381_03_patch03	-14.84	RFP	251.96875	0.971552884
20170421_MKY0381_03_patch03	-14.31	RFP	241.6875	0.971552884
20170421_MKY0381_03_patch03	-13.78	RFP	333.1875	0.971552884
20170421_MKY0381_03_patch03	-13.25	RFP	333.1875	0.971552884
20170421_MKY0381_03_patch03	-12.72	RFP	261.03125	0.971552884
20170421_MKY0381_03_patch03	-12.19	RFP	298.125	0.971552884
20170421_MKY0381_03_patch03	-11.66	RFP	339.3125	0.971552884
20170421_MKY0381_03_patch03	-11.13	RFP	331.40625	0.971552884
20170421_MKY0381_03_patch03	-10.6	RFP	294.75	0.971552884
20170421_MKY0381_03_patch03	-10.07	RFP	331.40625	0.971552884
20170421_MKY0381_03_patch03	-9.54	RFP	307.46875	0.971552884
20170421_MKY0381_03_patch03	-9.01	RFP	307.46875	0.971552884
20170421_MKY0381_03_patch03	-8.48	RFP	310.4375	0.971552884
20170421_MKY0381_03_patch03	-7.95	RFP	331.0625	0.971552884
20170421_MKY0381_03_patch03	-7.42	RFP	352.21875	0.971552884
20170421_MKY0381_03_patch03	-6.89	RFP	295.03125	0.971552884
20170421_MKY0381_03_patch03	-6.36	RFP	343.125	0.971552884
20170421_MKY0381_03_patch03	-5.83	RFP	303.84375	0.971552884
20170421_MKY0381_03_patch03	-5.3	RFP	399.75	0.971552884
20170421_MKY0381_03_patch03	-4.77	RFP	372.1875	0.971552884
20170421_MKY0381_03_patch03	-4.24	RFP	315.53125	0.971552884
20170421_MKY0381_03_patch03	-3.71	RFP	288.90625	0.971552884
20170421_MKY0381_03_patch03	-3.18	RFP	389.40625	0.971552884
20170421_MKY0381_03_patch03	-2.65	RFP	411.5625	0.971552884
20170421_MKY0381_03_patch03	-2.12	RFP	396.21875	0.971552884
20170421_MKY0381_03_patch03	-1.59	RFP	320.5625	0.971552884
20170421_MKY0381_03_patch03	-1.06	RFP	291.78125	0.971552884
20170421_MKY0381_03_patch03	-0.53	RFP	291.78125	0.971552884
20170421_MKY0381_03_patch03	0	RFP	244.65625	0.971552884
20170421_MKY0381_03_patch03	0.53	RFP	349.65625	0.971552884
20170421_MKY0381_03_patch03	1.06	RFP	260.15625	0.971552884
20170421_MKY0381_03_patch03	1.59	RFP	230.15625	0.971552884
20170421_MKY0381_03_patch03	2.12	RFP	185.90625	0.971552884
20170421_MKY0381_03_patch03	2.65	RFP	238.3125	0.971552884
20170421_MKY0381_03_patch03	3.18	RFP	263.84375	0.971552884
20170421_MKY0381_03_patch03	3.71	RFP	235.90625	0.971552884
20170421_MKY0381_03_patch03	4.24	RFP	277.53125	0.971552884
20170421_MKY0381_03_patch03	4.77	RFP	241.21875	0.971552884
20170421_MKY0381_03_patch03	5.3	RFP	295.46875	0.971552884
20170421_MKY0381_03_patch03	5.83	RFP	342.25	0.971552884
20170421_MKY0381_03_patch03	6.36	RFP	266.40625	0.971552884
20170421_MKY0381_03_patch03	6.89	RFP	274.65625	0.971552884
20170421_MKY0381_03_patch03	7.42	RFP	240.625	0.971552884
20170421_MKY0381_03_patch03	7.95	RFP	233.9375	0.971552884
20170421_MKY0381_03_patch03	8.48	RFP	305.5	0.971552884
20170421_MKY0381_03_patch03	9.01	RFP	275.15625	0.971552884
20170421_MKY0381_03_patch03	9.54	RFP	220.09375	0.971552884
20170421_MKY0381_03_patch03	10.07	RFP	189.6875	0.971552884
20170421_MKY0381_03_patch03	10.6	RFP	245.65625	0.971552884
20170421_MKY0381_03_patch03	11.13	RFP	236.5	0.971552884
20170421_MKY0381_03_patch03	11.66	RFP	270.125	0.971552884
20170421_MKY0381_03_patch03	12.19	RFP	330.9375	0.971552884
20170421_MKY0381_03_patch03	12.72	RFP	223.09375	0.971552884
20170421_MKY0381_03_patch03	13.25	RFP	216.75	0.971552884
20170421_MKY0381_03_patch03	13.78	RFP	282.75	0.971552884
20170421_MKY0381_03_patch03	14.31	RFP	266.78125	0.971552884
20170421_MKY0381_03_patch03	14.84	RFP	265.0625	0.971552884
20170421_MKY0381_03_patch03	15.37	RFP	290.375	0.971552884
20170421_MKY0381_03_patch03	15.9	RFP	212.71875	0.971552884
20170421_MKY0381_03_patch03	16.43	RFP	251.125	0.971552884
20170421_MKY0381_03_patch03	16.96	RFP	232.40625	0.971552884
20170421_MKY0381_03_patch03	17.49	RFP	233.25	0.971552884
20170421_MKY0381_03_patch03	18.02	RFP	267.96875	0.971552884
20170421_MKY0381_03_patch03	18.55	RFP	248.65625	0.971552884
20170421_MKY0381_03_patch03	19.08	RFP	216.78125	0.971552884
20170421_MKY0381_03_patch03	19.61	RFP	204.71875	0.971552884
20170421_MKY0381_03_patch03	20.14	RFP	212.96875	0.971552884
20170421_MKY0381_03_patch03	20.67	RFP	222.03125	0.971552884
20170421_MKY0381_03_patch03	21.2	RFP	286.53125	0.971552884
20170421_MKY0381_03_patch03	21.73	RFP	289.90625	0.971552884
20170421_MKY0381_03_patch03	22.26	RFP	284.46875	0.971552884
20170421_MKY0381_03_patch03	22.79	RFP	267.5	0.971552884
20170421_MKY0381_03_patch03	23.32	RFP	309.78125	0.971552884
20170421_MKY0381_03_patch03	23.85	RFP	309.375	0.971552884
20170421_MKY0381_03_patch03	24.38	RFP	277.15625	0.971552884
20170421_MKY0381_03_patch03	24.91	RFP	292.53125	0.971552884
20170421_MKY0381_03_patch03	25.44	RFP	302.71875	0.971552884
20170421_MKY0381_03_patch03	25.97	RFP	273.53125	0.971552884
20170421_MKY0381_03_patch03	26.5	RFP	341.28125	0.971552884
20170421_MKY0381_03_patch03	27.03	RFP	304.0625	0.971552884
20170421_MKY0381_03_patch03	27.56	RFP	290.5625	0.971552884
20170421_MKY0381_03_patch03	28.09	RFP	285	0.971552884
20170421_MKY0381_03_patch03	28.62	RFP	273.6875	0.971552884
20170421_MKY0381_03_patch03	29.15	RFP	256.84375	0.971552884
20170421_MKY0381_03_patch03	29.68	RFP	281.15625	0.971552884
20170421_MKY0381_03_patch03	30.21	RFP	288.5625	0.971552884
20170421_MKY0381_03_patch03	30.74	RFP	310.875	0.971552884
20170421_MKY0381_03_patch03	31.27	RFP	219.78125	0.971552884
20170421_MKY0381_03_patch03	31.8	RFP	276.9375	0.971552884
20170421_MKY0381_03_patch03	32.33	RFP	225.875	0.971552884
20170421_MKY0381_03_patch03	32.86	RFP	243.875	0.971552884
20170421_MKY0381_03_patch03	33.39	RFP	291.34375	0.971552884
20170421_MKY0381_03_patch03	33.92	RFP	228.28125	0.971552884
20170421_MKY0381_03_patch03	34.45	RFP	332.78125	0.971552884
20170421_MKY0381_03_patch03	34.98	RFP	293.8125	0.971552884
20170421_MKY0381_03_patch03	35.51	RFP	303.1875	0.971552884
20170421_MKY0381_03_patch03	36.04	RFP	211.34375	0.971552884
20170421_MKY0381_03_patch03	36.57	RFP	262.78125	0.971552884
20170421_MKY0381_03_patch03	37.1	RFP	271.84375	0.971552884
20170421_MKY0381_03_patch03	37.63	RFP	245.4375	0.971552884
20170421_MKY0381_03_patch03	38.16	RFP	284.21875	0.971552884
20170421_MKY0381_03_patch03	38.69	RFP	349.3125	0.971552884
20170421_MKY0381_03_patch03	39.22	RFP	214.15625	0.971552884
20170421_MKY0381_03_patch03	39.75	RFP	342.59375	0.971552884
20170421_MKY0381_03_patch03	40.28	RFP	320.46875	0.971552884
20170421_MKY0381_03_patch03	40.81	RFP	321.4375	0.971552884
20170421_MKY0381_03_patch03	41.34	RFP	288.09375	0.971552884
20170421_MKY0381_03_patch03	41.87	RFP	259.9375	0.971552884
20170421_MKY0381_03_patch03	42.4	RFP	354.21875	0.971552884
20170421_MKY0381_03_patch03	42.93	RFP	304.25	0.971552884
20170421_MKY0381_03_patch03	43.46	RFP	363.78125	0.971552884
20170421_MKY0381_03_patch03	43.99	RFP	326.25	0.971552884
20170421_MKY0381_03_patch03	44.52	RFP	385.21875	0.971552884
20170421_MKY0381_03_patch03	45.05	RFP	342.65625	0.971552884
20170421_MKY0381_03_patch03	45.58	RFP	378.84375	0.971552884
20170421_MKY0381_03_patch03	46.11	RFP	368.8125	0.971552884
20170421_MKY0381_03_patch03	46.64	RFP	450.03125	0.971552884
20170421_MKY0381_03_patch03	47.17	RFP	296.71875	0.971552884
20170421_MKY0381_03_patch03	47.7	RFP	374.03125	0.971552884
20170421_MKY0381_03_patch03	48.23	RFP	495.65625	0.971552884
20170421_MKY0381_03_patch03	48.76	RFP	397.9375	0.971552884
20170421_MKY0381_03_patch03	49.29	RFP	474.03125	0.971552884
20170421_MKY0381_03_patch03	49.82	RFP	384.6875	0.971552884
20170421_MKY0381_03_patch03	50.35	RFP	492.3125	0.971552884
20170421_MKY0381_03_patch03	50.88	RFP	490.4375	0.971552884
20170421_MKY0381_03_patch03	51.41	RFP	451.625	0.971552884
20170421_MKY0381_03_patch03	51.94	RFP	419.875	0.971552884
20170421_MKY0381_03_patch03	52.47	RFP	316.96875	0.971552884
20170421_MKY0381_03_patch03	53	RFP	387.40625	0.971552884
20170421_MKY0381_03_patch03	53.53	RFP	366.8125	0.971552884
20170421_MKY0381_03_patch03	54.06	RFP	283.4375	0.971552884
20170421_MKY0381_03_patch03	54.59	RFP	314.875	0.971552884
20170421_MKY0381_03_patch03	55.12	RFP	335.53125	0.971552884
20170421_MKY0381_03_patch03	55.65	RFP	305	0.971552884
20170421_MKY0381_03_patch03	56.18	RFP	336.59375	0.971552884
20170421_MKY0381_03_patch03	56.71	RFP	353.15625	0.971552884
20170421_MKY0381_03_patch03	57.24	RFP	338.4375	0.971552884
20170421_MKY0381_03_patch03	57.77	RFP	330.03125	0.971552884
20170421_MKY0381_03_patch03	58.3	RFP	306.9375	0.971552884
20170421_MKY0381_03_patch03	58.83	RFP	353.28125	0.971552884
20170421_MKY0381_03_patch03	59.36	RFP	246.59375	0.971552884
20170421_MKY0381_03_patch03	59.89	RFP	309.78125	0.971552884
20170421_MKY0381_03_patch03	60.42	RFP	284.46875	0.971552884
20170421_MKY0381_03_patch03	60.95	RFP	311.125	0.971552884
20170421_MKY0381_03_patch03	61.48	RFP	328.25	0.971552884
20170421_MKY0381_03_patch03	62.01	RFP	305.78125	0.971552884
20170421_MKY0381_03_patch03	62.54	RFP	347.6875	0.971552884
20170421_MKY0381_03_patch03	63.07	RFP	377.875	0.971552884
20170421_MKY0381_03_patch03	63.6	RFP	377.8125	0.971552884
20170421_MKY0381_03_patch03	64.13	RFP	345.90625	0.971552884
20170421_MKY0381_03_patch03	64.66	RFP	349.59375	0.971552884
20170421_MKY0381_03_patch03	65.19	RFP	327.40625	0.971552884
20170421_MKY0381_03_patch03	65.72	RFP	326.21875	0.971552884
20170421_MKY0381_03_patch03	66.25	RFP	322.15625	0.971552884
20170421_MKY0381_03_patch03	66.78	RFP	361.34375	0.971552884
20170421_MKY0381_03_patch03	67.31	RFP	335.875	0.971552884
20170421_MKY0381_03_patch03	67.84	RFP	332.1875	0.971552884
20170421_MKY0381_03_patch03	68.37	RFP	336.46875	0.971552884
20170421_MKY0381_03_patch03	68.9	RFP	297.4375	0.971552884
20170421_MKY0381_03_patch03	69.43	RFP	265.625	0.971552884
20170421_MKY0381_03_patch03	69.96	RFP	294.09375	0.971552884
20170421_MKY0381_03_patch03	70.49	RFP	334.6875	0.971552884
20170421_MKY0381_03_patch03	71.02	RFP	232.375	0.971552884
20170421_MKY0381_03_patch03	71.55	RFP	302.78125	0.971552884
20170421_MKY0381_03_patch03	72.08	RFP	320.84375	0.971552884
20170421_MKY0381_03_patch03	72.61	RFP	340.71875	0.971552884
20170421_MKY0381_03_patch03	73.14	RFP	328.96875	0.971552884
20170421_MKY0381_03_patch03	73.67	RFP	268.46875	0.971552884
20170421_MKY0381_03_patch03	74.2	RFP	305.5625	0.971552884
20170421_MKY0381_03_patch03	74.73	RFP	290.1875	0.971552884
20170421_MKY0381_03_patch03	75.26	RFP	327.5625	0.971552884
20170421_MKY0381_03_patch03	75.79	RFP	343.875	0.971552884
20170421_MKY0381_03_patch03	76.32	RFP	269.9375	0.971552884
20170421_MKY0381_03_patch03	76.85	RFP	293.09375	0.971552884
20170421_MKY0381_03_patch03	77.38	RFP	336.5	0.971552884
20170421_MKY0381_03_patch03	77.91	RFP	304.28125	0.971552884
20170421_MKY0381_03_patch03	78.44	RFP	272.875	0.971552884
20170421_MKY0381_03_patch03	78.97	RFP	368.71875	0.971552884
20170421_MKY0381_03_patch03	79.5	RFP	276.96875	0.971552884
20170421_MKY0381_03_patch03	80.03	RFP	304.28125	0.971552884
20170421_MKY0381_03_patch03	80.56	RFP	278.8125	0.971552884
20170421_MKY0381_03_patch03	81.09	RFP	299.21875	0.971552884
20170421_MKY0381_03_patch03	81.62	RFP	262.875	0.971552884
20170421_MKY0381_03_patch03	82.15	RFP	288.15625	0.971552884
20170421_MKY0381_03_patch03	82.68	RFP	295.8125	0.971552884
20170421_MKY0381_03_patch03	83.21	RFP	266.6875	0.971552884
20170421_MKY0381_03_patch03	83.74	RFP	301.28125	0.971552884
20170421_MKY0381_03_patch03	84.27	RFP	269	0.971552884
20170421_MKY0381_03_patch03	84.8	RFP	259.28125	0.971552884
20170421_MKY0381_03_patch03	85.33	RFP	340.09375	0.971552884
20170421_MKY0381_03_patch03	85.86	RFP	291.15625	0.971552884
20170421_MKY0381_03_patch03	86.39	RFP	326.84375	0.971552884
20170421_MKY0381_03_patch03	86.92	RFP	258.65625	0.971552884
20170421_MKY0381_03_patch03	87.45	RFP	312.625	0.971552884
20170421_MKY0381_03_patch03	87.98	RFP	233.125	0.971552884
20170421_MKY0381_03_patch03	88.51	RFP	293.125	0.971552884
20170421_MKY0381_03_patch03	89.04	RFP	286.96875	0.971552884
20170421_MKY0381_03_patch03	89.57	RFP	312.21875	0.971552884
20170421_MKY0381_03_patch03	90.1	RFP	298.09375	0.971552884
20170421_MKY0381_03_patch03	90.63	RFP	321.875	0.971552884
20170421_MKY0381_03_patch03	91.16	RFP	241	0.971552884
20170421_MKY0381_03_patch03	91.69	RFP	290.6875	0.971552884
20170421_MKY0381_03_patch03	92.22	RFP	310.5625	0.971552884
20170421_MKY0381_03_patch03	92.75	RFP	288.15625	0.971552884
20170421_MKY0381_03_patch03	93.28	RFP	258.4375	0.971552884
20170421_MKY0381_03_patch03	93.81	RFP	271.46875	0.971552884
20170421_MKY0381_03_patch03	94.34	RFP	318.71875	0.971552884
20170421_MKY0381_03_patch03	94.87	RFP	295.03125	0.971552884
20170421_MKY0381_03_patch03	95.4	RFP	308.0625	0.971552884
20170421_MKY0381_03_patch03	95.93	RFP	311.75	0.971552884
20170421_MKY0381_03_patch03	96.46	RFP	279.46875	0.971552884
20170421_MKY0381_03_patch03	96.99	RFP	310.0625	0.971552884
20170421_MKY0381_03_patch03	97.52	RFP	283.15625	0.971552884
20170421_MKY0381_03_patch03	98.05	RFP	331.25	0.971552884
20170421_MKY0381_03_patch03	98.58	RFP	281.375	0.971552884
20170421_MKY0381_03_patch03	99.11	RFP	253.96875	0.971552884
20170421_MKY0381_03_patch03	99.64	RFP	271.4375	0.971552884
20170421_MKY0381_03_patch03	100.17	RFP	247.25	0.971552884
20170421_MKY0381_03_patch03	100.7	RFP	310.90625	0.971552884
20170421_MKY0381_03_patch03	101.23	RFP	258.4375	0.971552884
20170421_MKY0381_03_patch03	101.76	RFP	259.03125	0.971552884
20170421_MKY0381_03_patch03	102.29	RFP	259.59375	0.971552884
20170421_MKY0381_03_patch03	102.82	RFP	297.8125	0.971552884
20170421_MKY0381_03_patch03	103.35	RFP	297.15625	0.971552884
20170421_MKY0381_03_patch03	103.88	RFP	291.28125	0.971552884
20170421_MKY0381_03_patch03	104.41	RFP	259.15625	0.971552884
20170421_MKY0381_03_patch03	104.94	RFP	226.3125	0.971552884
20170421_MKY0381_03_patch03	105.47	RFP	270	0.971552884
20170421_MKY0381_03_patch03	106	RFP	291.46875	0.971552884
20170421_MKY0381_03_patch03	106.53	RFP	303.6875	0.971552884
20170421_MKY0381_03_patch03	107.06	RFP	313.6875	0.971552884
20170421_MKY0381_03_patch03	107.59	RFP	248.25	0.971552884
20170421_MKY0381_03_patch03	108.12	RFP	311.03125	0.971552884
20170421_MKY0381_03_patch03	108.65	RFP	377.59375	0.971552884
20170421_MKY0381_03_patch03	109.18	RFP	369.25	0.971552884
20170421_MKY0381_03_patch03	109.71	RFP	355.09375	0.971552884
20170421_MKY0381_03_patch03	110.24	RFP	276.625	0.971552884
20170421_MKY0381_03_patch03	110.77	RFP	280.34375	0.971552884
20170421_MKY0381_03_patch03	111.3	RFP	315.5	0.971552884
20170421_MKY0381_03_patch03	111.83	RFP	348.4375	0.971552884
20170421_MKY0381_03_patch03	112.36	RFP	379.28125	0.971552884
20170421_MKY0381_03_patch03	112.89	RFP	297.46875	0.971552884
20170421_MKY0381_03_patch03	113.42	RFP	295.21875	0.971552884
20170421_MKY0381_03_patch03	113.95	RFP	341.03125	0.971552884
20170421_MKY0381_03_patch03	114.48	RFP	247.625	0.971552884
20170421_MKY0381_03_patch03	115.01	RFP	322.96875	0.971552884
20170421_MKY0381_03_patch03	115.54	RFP	364	0.971552884
20170421_MKY0381_03_patch03	116.07	RFP	327.53125	0.971552884
20170421_MKY0381_03_patch03	116.6	RFP	266.53125	0.971552884
20170421_MKY0381_03_patch03	117.13	RFP	311.0625	0.971552884
20170421_MKY0381_03_patch03	117.66	RFP	350.59375	0.971552884
20170421_MKY0381_03_patch03	118.19	RFP	299.0625	0.971552884
20170421_MKY0381_03_patch03	118.72	RFP	295.15625	0.971552884
20170421_MKY0381_03_patch03	119.25	RFP	306.15625	0.971552884
20170421_MKY0381_03_patch03	119.78	RFP	298.90625	0.971552884
20170421_MKY0381_03_patch03	120.31	RFP	266.5625	0.971552884
20170421_MKY0381_03_patch03	120.84	RFP	246.875	0.971552884
20170421_MKY0381_03_patch03	121.37	RFP	277.15625	0.971552884
20170421_MKY0381_03_patch03	121.9	RFP	360.6875	0.971552884
20170421_MKY0381_03_patch03	122.43	RFP	263.5	0.971552884
20170421_MKY0381_03_patch03	122.96	RFP	254.15625	0.971552884
20170421_MKY0381_03_patch03	123.49	RFP	257.28125	0.971552884
20170421_MKY0381_03_patch03	124.02	RFP	275.15625	0.971552884
20170421_MKY0381_03_patch03	124.55	RFP	347.84375	0.971552884
20170421_MKY0381_03_patch03	125.08	RFP	301	0.971552884
20170421_MKY0381_03_patch03	125.61	RFP	321.75	0.971552884
20170421_MKY0381_03_patch03	126.14	RFP	370.625	0.971552884
20170421_MKY0381_03_patch03	126.67	RFP	288.875	0.971552884
20170421_MKY0381_03_patch03	127.2	RFP	280.875	0.971552884
20170421_MKY0381_03_patch03	127.73	RFP	301.34375	0.971552884
20170421_MKY0381_03_patch03	128.26	RFP	349.53125	0.971552884
20170421_MKY0381_03_patch03	128.79	RFP	318.96875	0.971552884
20170421_MKY0381_03_patch03	129.32	RFP	276.84375	0.971552884
20170421_MKY0381_03_patch03	129.85	RFP	313.09375	0.971552884
20170421_MKY0381_03_patch03	130.38	RFP	299.0625	0.971552884
20170421_MKY0381_03_patch03	130.91	RFP	315.71875	0.971552884
20170421_MKY0381_03_patch03	131.44	RFP	309	0.971552884
20170421_MKY0381_03_patch03	131.97	RFP	326.25	0.971552884
20170421_MKY0381_03_patch03	132.5	RFP	324.15625	0.971552884
20170421_MKY0381_03_patch03	133.03	RFP	350.375	0.971552884
20170421_MKY0381_03_patch03	133.56	RFP	278.46875	0.971552884
20170421_MKY0381_03_patch03	134.09	RFP	378.0625	0.971552884
20170421_MKY0381_03_patch03	134.62	RFP	326.96875	0.971552884
20170421_MKY0381_03_patch03	135.15	RFP	356.5625	0.971552884
20170421_MKY0381_03_patch03	135.68	RFP	313.75	0.971552884
20170421_MKY0381_03_patch03	136.21	RFP	337.0625	0.971552884
20170421_MKY0381_04_patch02	-21.73	GFP	1516.15625	1.059791343
20170421_MKY0381_04_patch02	-21.2	GFP	1153.78125	0.774715363
20170421_MKY0381_04_patch02	-20.67	GFP	1234.15625	0.837945393
20170421_MKY0381_04_patch02	-20.14	GFP	1237.1875	0.84033004
20170421_MKY0381_04_patch02	-19.61	GFP	1406.5625	0.973575281
20170421_MKY0381_04_patch02	-19.08	GFP	1208.59375	0.817835687
20170421_MKY0381_04_patch02	-18.55	GFP	1124.4375	0.751630994
20170421_MKY0381_04_patch02	-18.02	GFP	1088.125	0.723064395
20170421_MKY0381_04_patch02	-17.49	GFP	1051.4375	0.694202787
20170421_MKY0381_04_patch02	-16.96	GFP	1097.625	0.730537928
20170421_MKY0381_04_patch02	-16.43	GFP	1206.625	0.816286895
20170421_MKY0381_04_patch02	-15.9	GFP	1093.0625	0.726948666
20170421_MKY0381_04_patch02	-15.37	GFP	1238.71875	0.841534656
20170421_MKY0381_04_patch02	-14.84	GFP	946.875	0.611944747
20170421_MKY0381_04_patch02	-14.31	GFP	940.8125	0.607175453
20170421_MKY0381_04_patch02	-13.78	GFP	1272.9375	0.868454128
20170421_MKY0381_04_patch02	-13.25	GFP	1285.28125	0.878164805
20170421_MKY0381_04_patch02	-12.72	GFP	1084.28125	0.720040564
20170421_MKY0381_04_patch02	-12.19	GFP	1222.40625	0.828701812
20170421_MKY0381_04_patch02	-11.66	GFP	1221.9375	0.828333052
20170421_MKY0381_04_patch02	-11.13	GFP	1014.34375	0.665021588
20170421_MKY0381_04_patch02	-10.6	GFP	1140.71875	0.764439254
20170421_MKY0381_04_patch02	-10.07	GFP	1169.875	0.78737612
20170421_MKY0381_04_patch02	-9.54	GFP	1164.96875	0.783516433
20170421_MKY0381_04_patch02	-9.01	GFP	1234.59375	0.838289569
20170421_MKY0381_04_patch02	-8.48	GFP	1187.75	0.801438164
20170421_MKY0381_04_patch02	-7.95	GFP	1187.75	0.801438164
20170421_MKY0381_04_patch02	-7.42	GFP	610.65625	0.34744557
20170421_MKY0381_04_patch02	-6.89	GFP	1088.8125	0.723605243
20170421_MKY0381_04_patch02	-6.36	GFP	1129.9375	0.755957777
20170421_MKY0381_04_patch02	-5.83	GFP	1247.71875	0.848614846
20170421_MKY0381_04_patch02	-5.3	GFP	1257.65625	0.856432555
20170421_MKY0381_04_patch02	-4.77	GFP	1232.59375	0.836716193
20170421_MKY0381_04_patch02	-4.24	GFP	1300.3125	0.889989705
20170421_MKY0381_04_patch02	-3.71	GFP	1757.875	1.249948527
20170421_MKY0381_04_patch02	-3.18	GFP	1398.5625	0.967281779
20170421_MKY0381_04_patch02	-2.65	GFP	1603.28125	1.128331515
20170421_MKY0381_04_patch02	-2.12	GFP	1513.15625	1.05743128
20170421_MKY0381_04_patch02	-1.59	GFP	1366.78125	0.942279858
20170421_MKY0381_04_patch02	-1.06	GFP	1348.65625	0.928021142
20170421_MKY0381_04_patch02	-0.53	GFP	1348.65625	0.928021142
20170421_MKY0381_04_patch02	0	GFP	169	0
20170421_MKY0381_04_patch02	0.53	GFP	354.25	0.145733909
20170421_MKY0381_04_patch02	1.06	GFP	493.40625	0.255206429
20170421_MKY0381_04_patch02	1.59	GFP	536.5	0.289107755
20170421_MKY0381_04_patch02	2.12	GFP	639.75	0.370333267
20170421_MKY0381_04_patch02	2.65	GFP	652.3125	0.380216032
20170421_MKY0381_04_patch02	3.18	GFP	721.09375	0.4343254
20170421_MKY0381_04_patch02	3.71	GFP	557.3125	0.305480694
20170421_MKY0381_04_patch02	4.24	GFP	674.78125	0.397891923
20170421_MKY0381_04_patch02	4.77	GFP	727.75	0.43956179
20170421_MKY0381_04_patch02	5.3	GFP	571.78125	0.316863083
20170421_MKY0381_04_patch02	5.83	GFP	644.59375	0.374143786
20170421_MKY0381_04_patch02	6.36	GFP	743.15625	0.451681699
20170421_MKY0381_04_patch02	6.89	GFP	671.46875	0.395286019
20170421_MKY0381_04_patch02	7.42	GFP	722.875	0.435726687
20170421_MKY0381_04_patch02	7.95	GFP	594.03125	0.334366885
20170421_MKY0381_04_patch02	8.48	GFP	586.4375	0.328392975
20170421_MKY0381_04_patch02	9.01	GFP	627.5	0.360696342
20170421_MKY0381_04_patch02	9.54	GFP	627.5	0.360696342
20170421_MKY0381_04_patch02	10.07	GFP	459.6875	0.228680301
20170421_MKY0381_04_patch02	10.6	GFP	834.375	0.523442374
20170421_MKY0381_04_patch02	11.13	GFP	854.21875	0.539053209
20170421_MKY0381_04_patch02	11.66	GFP	783.09375	0.483100041
20170421_MKY0381_04_patch02	12.19	GFP	893.5	0.569955288
20170421_MKY0381_04_patch02	12.72	GFP	1134.09375	0.759227448
20170421_MKY0381_04_patch02	13.25	GFP	1157.53125	0.777665443
20170421_MKY0381_04_patch02	13.78	GFP	1021.9375	0.670995498
20170421_MKY0381_04_patch02	14.31	GFP	1179.34375	0.79482507
20170421_MKY0381_04_patch02	14.84	GFP	1081.71875	0.718024676
20170421_MKY0381_04_patch02	15.37	GFP	1086.125	0.721491019
20170421_MKY0381_04_patch02	15.9	GFP	1042.375	0.687073429
20170421_MKY0381_04_patch02	16.43	GFP	1094.875	0.728374537
20170421_MKY0381_04_patch02	16.96	GFP	1068.03125	0.707256887
20170421_MKY0381_04_patch02	17.49	GFP	1016.5	0.666717883
20170421_MKY0381_04_patch02	18.02	GFP	1057.3125	0.698824578
20170421_MKY0381_04_patch02	18.55	GFP	1109.875	0.740174854
20170421_MKY0381_04_patch02	19.08	GFP	1106.65625	0.737642702
20170421_MKY0381_04_patch02	19.61	GFP	1166.0625	0.784376873
20170421_MKY0381_04_patch02	20.14	GFP	1153.75	0.774690779
20170421_MKY0381_04_patch02	20.67	GFP	1342.375	0.92307976
20170421_MKY0381_04_patch02	21.2	GFP	1360.65625	0.937461395
20170421_MKY0381_04_patch02	21.73	GFP	1366.03125	0.941689842
20170421_MKY0381_04_patch02	22.26	GFP	1508.46875	1.053743681
20170421_MKY0381_04_patch02	22.79	GFP	1180.9375	0.796078853
20170421_MKY0381_04_patch02	23.32	GFP	1279.03125	0.873248006
20170421_MKY0381_04_patch02	23.85	GFP	1386.375	0.957694021
20170421_MKY0381_04_patch02	24.38	GFP	1353.125	0.931536653
20170421_MKY0381_04_patch02	24.91	GFP	1271.25	0.867126592
20170421_MKY0381_04_patch02	25.44	GFP	1150.25	0.771937372
20170421_MKY0381_04_patch02	25.97	GFP	1026.4375	0.674535593
20170421_MKY0381_04_patch02	26.5	GFP	1135	0.759940384
20170421_MKY0381_04_patch02	27.03	GFP	1309.65625	0.897340319
20170421_MKY0381_04_patch02	27.56	GFP	1218.4375	0.825579644
20170421_MKY0381_04_patch02	28.09	GFP	1012.78125	0.663792388
20170421_MKY0381_04_patch02	28.62	GFP	1115.78125	0.744821228
20170421_MKY0381_04_patch02	29.15	GFP	1148.96875	0.770929429
20170421_MKY0381_04_patch02	29.68	GFP	1410.59375	0.976746616
20170421_MKY0381_04_patch02	30.21	GFP	1132.625	0.758072
20170421_MKY0381_04_patch02	30.74	GFP	1089.65625	0.72426901
20170421_MKY0381_04_patch02	31.27	GFP	1164.3125	0.783000169
20170421_MKY0381_04_patch02	31.8	GFP	998.21875	0.652336248
20170421_MKY0381_04_patch02	32.33	GFP	1021.78125	0.670872578
20170421_MKY0381_04_patch02	32.86	GFP	973.9375	0.633234485
20170421_MKY0381_04_patch02	33.39	GFP	1126.59375	0.75332729
20170421_MKY0381_04_patch02	33.92	GFP	1110.5625	0.740715701
20170421_MKY0381_04_patch02	34.45	GFP	1180.21875	0.795513421
20170421_MKY0381_04_patch02	34.98	GFP	1334.78125	0.917105849
20170421_MKY0381_04_patch02	35.51	GFP	1218.90625	0.825948404
20170421_MKY0381_04_patch02	36.04	GFP	1442.84375	1.002117296
20170421_MKY0381_04_patch02	36.57	GFP	1276.03125	0.870887943
20170421_MKY0381_04_patch02	37.1	GFP	1282.0625	0.875632654
20170421_MKY0381_04_patch02	37.63	GFP	1177.3125	0.79322711
20170421_MKY0381_04_patch02	38.16	GFP	1161.03125	0.78041885
20170421_MKY0381_04_patch02	38.69	GFP	1065.15625	0.70499516
20170421_MKY0381_04_patch02	39.22	GFP	1154.8125	0.775526635
20170421_MKY0381_04_patch02	39.75	GFP	1088.03125	0.722990643
20170421_MKY0381_04_patch02	40.28	GFP	1308.09375	0.89611112
20170421_MKY0381_04_patch02	40.81	GFP	1425.875	0.988768188
20170421_MKY0381_04_patch02	41.34	GFP	1368.75	0.94382865
20170421_MKY0381_04_patch02	41.87	GFP	1594.65625	1.121546333
20170421_MKY0381_04_patch02	42.4	GFP	1497.28125	1.044942612
20170421_MKY0381_04_patch02	42.93	GFP	1151.90625	0.773240324
20170421_MKY0381_04_patch02	43.46	GFP	1472.65625	1.025570425
20170421_MKY0381_04_patch02	43.99	GFP	1367.5	0.94284529
20170421_MKY0381_04_patch02	44.52	GFP	1275.5	0.870470015
20170421_MKY0381_04_patch02	45.05	GFP	1331	0.914131186
20170421_MKY0381_04_patch02	45.58	GFP	1332.15625	0.915040794
20170421_MKY0381_04_patch02	46.11	GFP	1380.96875	0.953440991
20170421_MKY0381_04_patch02	46.64	GFP	1449.53125	1.007378271
20170421_MKY0381_04_patch02	47.17	GFP	1214.21875	0.822260805
20170421_MKY0381_04_patch02	47.7	GFP	1294.5	0.885417083
20170421_MKY0381_04_patch02	48.23	GFP	1258.25	0.856899651
20170421_MKY0381_04_patch02	48.76	GFP	1083.25	0.719229292
20170421_MKY0381_04_patch02	49.29	GFP	1163.25	0.782164313
20170421_MKY0381_04_patch02	49.82	GFP	1192.4375	0.805125762
20170421_MKY0381_04_patch02	50.35	GFP	1189.5625	0.802864035
20170421_MKY0381_04_patch02	50.88	GFP	1056.6875	0.698332898
20170421_MKY0381_04_patch02	51.41	GFP	963.09375	0.62470384
20170421_MKY0381_04_patch02	51.94	GFP	1139.125	0.763185471
20170421_MKY0381_04_patch02	52.47	GFP	1102.65625	0.734495951
20170421_MKY0381_04_patch02	53	GFP	1082	0.718245932
20170421_MKY0381_04_patch02	53.53	GFP	818.84375	0.511224129
20170421_MKY0381_04_patch02	54.06	GFP	1079.75	0.716475885
20170421_MKY0381_04_patch02	54.59	GFP	1207.65625	0.817098167
20170421_MKY0381_04_patch02	55.12	GFP	1112.625	0.742338245
20170421_MKY0381_04_patch02	55.65	GFP	1045.15625	0.689261405
20170421_MKY0381_04_patch02	56.18	GFP	1169.03125	0.786712352
20170421_MKY0381_04_patch02	56.71	GFP	1352.28125	0.930872885
20170421_MKY0381_04_patch02	57.24	GFP	1302.34375	0.891587665
20170421_MKY0381_04_patch02	57.77	GFP	1642.46875	1.159159842
20170421_MKY0381_04_patch02	58.3	GFP	1460.28125	1.015835164
20170421_MKY0381_04_patch02	58.83	GFP	1768.0625	1.257962909
20170421_MKY0381_04_patch02	59.36	GFP	1663.1875	1.175459029
20170421_MKY0381_04_patch02	59.89	GFP	1715.03125	1.216243873
20170421_MKY0381_04_patch02	60.42	GFP	2084.8125	1.507146259
20170421_MKY0381_04_patch02	60.95	GFP	2051.84375	1.481210147
20170421_MKY0381_04_patch02	61.48	GFP	1723.5	1.222906135
20170421_MKY0381_04_patch02	62.01	GFP	1579.84375	1.109893521
20170421_MKY0381_04_patch02	62.54	GFP	1603	1.128110259
20170421_MKY0381_04_patch02	63.07	GFP	1863.3125	1.332894919
20170421_MKY0381_04_patch02	63.6	GFP	2009.78125	1.448120093
20170421_MKY0381_04_patch02	64.13	GFP	1998.1875	1.438999431
20170421_MKY0381_04_patch02	64.66	GFP	1872.03125	1.339753853
20170421_MKY0381_04_patch02	65.19	GFP	1816.09375	1.295748506
20170421_MKY0381_04_patch02	65.72	GFP	1880.75	1.346612787
20170421_MKY0381_04_patch02	66.25	GFP	1849.75	1.322225466
20170421_MKY0381_04_patch02	66.78	GFP	1741.125	1.236771507
20170421_MKY0381_04_patch02	67.31	GFP	1728.53125	1.226864158
20170421_MKY0381_04_patch02	67.84	GFP	1930.125	1.385455495
20170421_MKY0381_04_patch02	68.37	GFP	1723.125	1.222611127
20170421_MKY0381_04_patch02	68.9	GFP	1802.0625	1.284710293
20170421_MKY0381_04_patch02	69.43	GFP	1783.15625	1.269836977
20170421_MKY0381_04_patch02	69.96	GFP	1762.71875	1.253759046
20170421_MKY0381_04_patch02	70.49	GFP	1818.40625	1.297567721
20170421_MKY0381_04_patch02	71.02	GFP	1967.1875	1.414612111
20170421_MKY0381_04_patch02	71.55	GFP	2091.59375	1.512480986
20170421_MKY0381_04_patch02	72.08	GFP	2082.8125	1.505572884
20170421_MKY0381_04_patch02	72.61	GFP	2356.8125	1.721125332
20170421_MKY0381_04_patch02	73.14	GFP	2254.78125	1.640858596
20170421_MKY0381_04_patch02	73.67	GFP	2088	1.509653827
20170421_MKY0381_04_patch02	74.2	GFP	2087	1.508867139
20170421_MKY0381_04_patch02	74.73	GFP	2067.1875	1.493280887
20170421_MKY0381_04_patch02	75.26	GFP	1875.65625	1.342605596
20170421_MKY0381_04_patch02	75.79	GFP	2144.125	1.553806678
20170421_MKY0381_04_patch02	76.32	GFP	2264.84375	1.648774642
20170421_MKY0381_04_patch02	76.85	GFP	2110.25	1.527157629
20170421_MKY0381_04_patch02	77.38	GFP	2005.09375	1.444432494
20170421_MKY0381_04_patch02	77.91	GFP	2043.3125	1.474498717
20170421_MKY0381_04_patch02	78.44	GFP	1998.03125	1.438876512
20170421_MKY0381_04_patch02	78.97	GFP	1742.09375	1.237533611
20170421_MKY0381_04_patch02	79.5	GFP	1664.875	1.176786565
20170421_MKY0381_04_patch02	80.03	GFP	1835.96875	1.311383925
20170421_MKY0381_04_patch02	80.56	GFP	1721.53125	1.221357344
20170421_MKY0381_04_patch02	81.09	GFP	1748.34375	1.242450409
20170421_MKY0381_04_patch02	81.62	GFP	1745.625	1.240311602
20170421_MKY0381_04_patch02	82.15	GFP	1602.96875	1.128085675
20170421_MKY0381_04_patch02	82.68	GFP	1599.53125	1.125381436
20170421_MKY0381_04_patch02	83.21	GFP	1868.6875	1.337123366
20170421_MKY0381_04_patch02	83.74	GFP	1660.46875	1.173320222
20170421_MKY0381_04_patch02	84.27	GFP	1977.125	1.42242982
20170421_MKY0381_04_patch02	84.8	GFP	1860.59375	1.330756111
20170421_MKY0381_04_patch02	85.33	GFP	2012.53125	1.450283484
20170421_MKY0381_04_patch02	85.86	GFP	1751.28125	1.244761305
20170421_MKY0381_04_patch02	86.39	GFP	1767.5	1.257520397
20170421_MKY0381_04_patch02	86.92	GFP	1637.75	1.155447659
20170421_MKY0381_04_patch02	87.45	GFP	1753.4375	1.2464576
20170421_MKY0381_04_patch02	87.98	GFP	1554.09375	1.089636311
20170421_MKY0381_04_patch02	88.51	GFP	1609.9375	1.133567906
20170421_MKY0381_04_patch02	89.04	GFP	1695.40625	1.200805126
20170421_MKY0381_04_patch02	89.57	GFP	1527.875	1.069010341
20170421_MKY0381_04_patch02	90.1	GFP	1679.6875	1.188439377
20170421_MKY0381_04_patch02	90.63	GFP	1797.9375	1.281465206
20170421_MKY0381_04_patch02	91.16	GFP	1725.09375	1.224159919
20170421_MKY0381_04_patch02	91.69	GFP	1746.0625	1.240655778
20170421_MKY0381_04_patch02	92.22	GFP	1725.15625	1.224209087
20170421_MKY0381_04_patch02	92.75	GFP	1935.53125	1.389708526
20170421_MKY0381_04_patch02	93.28	GFP	1915.4375	1.373901019
20170421_MKY0381_04_patch02	93.81	GFP	1978.375	1.42341318
20170421_MKY0381_04_patch02	94.34	GFP	2084.40625	1.506826667
20170421_MKY0381_04_patch02	94.87	GFP	2146.21875	1.555453805
20170421_MKY0381_04_patch02	95.4	GFP	2029.34375	1.463509672
20170421_MKY0381_04_patch02	95.93	GFP	1943.40625	1.395903692
20170421_MKY0381_04_patch02	96.46	GFP	1893.78125	1.356864312
20170421_MKY0381_04_patch02	96.99	GFP	1709.65625	1.212015426
20170421_MKY0381_04_patch02	97.52	GFP	1623.46875	1.144212774
20170421_MKY0381_04_patch02	98.05	GFP	1790.8125	1.275860056
20170421_MKY0381_04_patch02	98.58	GFP	1798.46875	1.281883134
20170421_MKY0381_04_patch02	99.11	GFP	1964.96875	1.412866647
20170421_MKY0381_04_patch02	99.64	GFP	1825.75	1.30334496
20170421_MKY0381_04_patch02	100.17	GFP	1713.34375	1.214916338
20170421_MKY0381_04_patch02	100.7	GFP	1674.96875	1.184727195
20170421_MKY0381_04_patch02	101.23	GFP	1700.625	1.204910653
20170421_MKY0381_04_patch02	101.76	GFP	1777.96875	1.265756035
20170421_MKY0381_04_patch02	102.29	GFP	1716.875	1.217694329
20170421_MKY0381_04_patch02	102.82	GFP	1893.40625	1.356569304
20170421_MKY0381_04_patch02	103.35	GFP	1688	1.194978719
20170421_MKY0381_04_patch02	103.88	GFP	1536.40625	1.075721771
20170421_MKY0381_04_patch02	104.41	GFP	1946.5	1.398337507
20170421_MKY0381_04_patch02	104.94	GFP	1842.4375	1.316472812
20170421_MKY0381_04_patch02	105.47	GFP	1832.34375	1.308532182
20170421_MKY0381_04_patch02	106	GFP	1880	1.346022771
20170421_MKY0381_04_patch02	106.53	GFP	1640.21875	1.157389795
20170421_MKY0381_04_patch02	107.06	GFP	1895.4375	1.358167263
20170421_MKY0381_04_patch02	107.59	GFP	1879.15625	1.345359003
20170421_MKY0381_04_patch02	108.12	GFP	1669.25	1.180228324
20170421_MKY0381_04_patch02	108.65	GFP	1697.40625	1.202378501
20170421_MKY0381_04_patch02	109.18	GFP	1778.6875	1.266321466
20170421_MKY0381_04_patch02	109.71	GFP	1685.78125	1.193233256
20170421_MKY0381_04_patch02	110.24	GFP	1806.875	1.288496228
20170421_MKY0381_04_patch02	110.77	GFP	1803.25	1.285644485
20170421_MKY0381_04_patch02	111.3	GFP	1690.5625	1.196994607
20170421_MKY0381_04_patch02	111.83	GFP	1670.625	1.18131002
20170421_MKY0381_04_patch02	112.36	GFP	1603.34375	1.128380683
20170421_MKY0381_04_patch02	112.89	GFP	1695.5625	1.200928046
20170421_MKY0381_04_patch02	113.42	GFP	1624.1875	1.144778206
20170421_MKY0381_04_patch02	113.95	GFP	1960.1875	1.409105296
20170421_MKY0381_04_patch02	114.48	GFP	1762.59375	1.25366071
20170421_MKY0381_04_patch02	115.01	GFP	1759.9375	1.251571071
20170421_MKY0381_04_patch02	115.54	GFP	1712.6875	1.214400074
20170421_MKY0381_04_patch02	116.07	GFP	1936.75	1.390667302
20170421_MKY0381_04_patch02	116.6	GFP	1938.875	1.392339013
20170421_MKY0381_04_patch02	117.13	GFP	2015	1.45222562
20170421_MKY0381_04_patch02	117.66	GFP	2310.96875	1.685060615
20170421_MKY0381_04_patch02	118.19	GFP	2442.625	1.788632976
20170421_MKY0381_04_patch02	118.72	GFP	2441.28125	1.787575865
20170421_MKY0381_04_patch02	119.25	GFP	2255.46875	1.641399444
20170421_MKY0381_04_patch02	119.78	GFP	2138.96875	1.549750319
20170421_MKY0381_04_patch02	120.31	GFP	2150.8125	1.559067652
20170421_MKY0381_04_patch02	120.84	GFP	1954.9375	1.404975186
20170421_MKY0381_04_patch02	121.37	GFP	1983.59375	1.427518707
20170421_MKY0381_04_patch02	121.9	GFP	1816.40625	1.295994346
20170421_MKY0381_04_patch02	122.43	GFP	1812.34375	1.292798427
20170421_MKY0381_04_patch02	122.96	GFP	1875.875	1.342777684
20170421_MKY0381_04_patch02	123.49	GFP	1654.875	1.168919687
20170421_MKY0381_04_patch02	124.02	GFP	1746.84375	1.241270378
20170421_MKY0381_04_patch02	124.55	GFP	2094.3125	1.514619793
20170421_MKY0381_04_patch02	125.08	GFP	2170	1.574162224
20170421_MKY0381_04_patch02	125.61	GFP	1992.59375	1.434598897
20170421_MKY0381_04_patch02	126.14	GFP	1861.03125	1.331100287
20170421_MKY0381_04_patch02	126.67	GFP	2065.65625	1.492076272
20170421_MKY0381_04_patch02	127.2	GFP	1975.65625	1.421274373
20170421_MKY0381_04_patch02	127.73	GFP	1922.0625	1.379112825
20170421_MKY0381_04_patch02	128.26	GFP	1981.3125	1.425724075
20170421_MKY0381_04_patch02	128.79	GFP	1946.71875	1.398509595
20170421_MKY0381_04_patch02	129.32	GFP	1797.28125	1.280948942
20170421_MKY0381_04_patch02	129.85	GFP	1560.03125	1.094307269
20170421_MKY0381_04_patch02	130.38	GFP	1571.75	1.103526266
20170421_MKY0381_04_patch02	130.91	GFP	1495.125	1.043246316
20170421_MKY0381_04_patch02	131.44	GFP	1685.0625	1.192667824
20170421_MKY0381_04_patch02	131.97	GFP	1752.875	1.246015088
20170421_MKY0381_04_patch02	132.5	GFP	1603.4375	1.128454435
20170421_MKY0381_04_patch02	133.03	GFP	1379.875	0.952580551
20170421_MKY0381_04_patch02	133.56	GFP	1066.5625	0.70610144
20170421_MKY0381_04_patch02	134.09	GFP	975.0625	0.634119509
20170421_MKY0381_04_patch02	134.62	GFP	930.875	0.599357743
20170421_MKY0381_04_patch02	135.15	GFP	912.125	0.584607348
20170421_MKY0381_04_patch02	135.68	GFP	960.53125	0.622687952
20170421_MKY0381_04_patch02	136.21	GFP	914.53125	0.586500315
20170421_MKY0381_04_patch02	136.74	GFP	1000.21875	0.653909623
20170421_MKY0381_04_patch02	-21.73	RFP	324.90625	0.653909623
20170421_MKY0381_04_patch02	-21.2	RFP	336.96875	0.653909623
20170421_MKY0381_04_patch02	-20.67	RFP	288.15625	0.653909623
20170421_MKY0381_04_patch02	-20.14	RFP	358.375	0.653909623
20170421_MKY0381_04_patch02	-19.61	RFP	397.3125	0.653909623
20170421_MKY0381_04_patch02	-19.08	RFP	374.09375	0.653909623
20170421_MKY0381_04_patch02	-18.55	RFP	372.25	0.653909623
20170421_MKY0381_04_patch02	-18.02	RFP	330.75	0.653909623
20170421_MKY0381_04_patch02	-17.49	RFP	314.09375	0.653909623
20170421_MKY0381_04_patch02	-16.96	RFP	375.03125	0.653909623
20170421_MKY0381_04_patch02	-16.43	RFP	359.28125	0.653909623
20170421_MKY0381_04_patch02	-15.9	RFP	409.90625	0.653909623
20170421_MKY0381_04_patch02	-15.37	RFP	374.21875	0.653909623
20170421_MKY0381_04_patch02	-14.84	RFP	375.5	0.653909623
20170421_MKY0381_04_patch02	-14.31	RFP	297.09375	0.653909623
20170421_MKY0381_04_patch02	-13.78	RFP	306.28125	0.653909623
20170421_MKY0381_04_patch02	-13.25	RFP	369.6875	0.653909623
20170421_MKY0381_04_patch02	-12.72	RFP	370.96875	0.653909623
20170421_MKY0381_04_patch02	-12.19	RFP	354.21875	0.653909623
20170421_MKY0381_04_patch02	-11.66	RFP	307.65625	0.653909623
20170421_MKY0381_04_patch02	-11.13	RFP	320.5	0.653909623
20170421_MKY0381_04_patch02	-10.6	RFP	308.53125	0.653909623
20170421_MKY0381_04_patch02	-10.07	RFP	298.34375	0.653909623
20170421_MKY0381_04_patch02	-9.54	RFP	357.1875	0.653909623
20170421_MKY0381_04_patch02	-9.01	RFP	364.125	0.653909623
20170421_MKY0381_04_patch02	-8.48	RFP	310.90625	0.653909623
20170421_MKY0381_04_patch02	-7.95	RFP	310.90625	0.653909623
20170421_MKY0381_04_patch02	-7.42	RFP	295.75	0.653909623
20170421_MKY0381_04_patch02	-6.89	RFP	346.46875	0.653909623
20170421_MKY0381_04_patch02	-6.36	RFP	337.03125	0.653909623
20170421_MKY0381_04_patch02	-5.83	RFP	304.21875	0.653909623
20170421_MKY0381_04_patch02	-5.3	RFP	321.3125	0.653909623
20170421_MKY0381_04_patch02	-4.77	RFP	384.59375	0.653909623
20170421_MKY0381_04_patch02	-4.24	RFP	395	0.653909623
20170421_MKY0381_04_patch02	-3.71	RFP	328.8125	0.653909623
20170421_MKY0381_04_patch02	-3.18	RFP	349.65625	0.653909623
20170421_MKY0381_04_patch02	-2.65	RFP	393.0625	0.653909623
20170421_MKY0381_04_patch02	-2.12	RFP	399.84375	0.653909623
20170421_MKY0381_04_patch02	-1.59	RFP	242.59375	0.653909623
20170421_MKY0381_04_patch02	-1.06	RFP	297.875	0.653909623
20170421_MKY0381_04_patch02	-0.53	RFP	297.875	0.653909623
20170421_MKY0381_04_patch02	0	RFP	176.03125	0.653909623
20170421_MKY0381_04_patch02	0.53	RFP	286.40625	0.653909623
20170421_MKY0381_04_patch02	1.06	RFP	199.34375	0.653909623
20170421_MKY0381_04_patch02	1.59	RFP	231.28125	0.653909623
20170421_MKY0381_04_patch02	2.12	RFP	314.4375	0.653909623
20170421_MKY0381_04_patch02	2.65	RFP	326.125	0.653909623
20170421_MKY0381_04_patch02	3.18	RFP	309.625	0.653909623
20170421_MKY0381_04_patch02	3.71	RFP	239.96875	0.653909623
20170421_MKY0381_04_patch02	4.24	RFP	229.40625	0.653909623
20170421_MKY0381_04_patch02	4.77	RFP	209.71875	0.653909623
20170421_MKY0381_04_patch02	5.3	RFP	297.875	0.653909623
20170421_MKY0381_04_patch02	5.83	RFP	320.4375	0.653909623
20170421_MKY0381_04_patch02	6.36	RFP	212.75	0.653909623
20170421_MKY0381_04_patch02	6.89	RFP	253.71875	0.653909623
20170421_MKY0381_04_patch02	7.42	RFP	208.09375	0.653909623
20170421_MKY0381_04_patch02	7.95	RFP	288.9375	0.653909623
20170421_MKY0381_04_patch02	8.48	RFP	250.25	0.653909623
20170421_MKY0381_04_patch02	9.01	RFP	222.78125	0.653909623
20170421_MKY0381_04_patch02	9.54	RFP	222.78125	0.653909623
20170421_MKY0381_04_patch02	10.07	RFP	277.3125	0.653909623
20170421_MKY0381_04_patch02	10.6	RFP	250.25	0.653909623
20170421_MKY0381_04_patch02	11.13	RFP	365.84375	0.653909623
20170421_MKY0381_04_patch02	11.66	RFP	311.15625	0.653909623
20170421_MKY0381_04_patch02	12.19	RFP	291.125	0.653909623
20170421_MKY0381_04_patch02	12.72	RFP	266.625	0.653909623
20170421_MKY0381_04_patch02	13.25	RFP	379.4375	0.653909623
20170421_MKY0381_04_patch02	13.78	RFP	342.875	0.653909623
20170421_MKY0381_04_patch02	14.31	RFP	389.40625	0.653909623
20170421_MKY0381_04_patch02	14.84	RFP	323.6875	0.653909623
20170421_MKY0381_04_patch02	15.37	RFP	321.09375	0.653909623
20170421_MKY0381_04_patch02	15.9	RFP	377.71875	0.653909623
20170421_MKY0381_04_patch02	16.43	RFP	288.78125	0.653909623
20170421_MKY0381_04_patch02	16.96	RFP	320.90625	0.653909623
20170421_MKY0381_04_patch02	17.49	RFP	297.28125	0.653909623
20170421_MKY0381_04_patch02	18.02	RFP	377.09375	0.653909623
20170421_MKY0381_04_patch02	18.55	RFP	294.875	0.653909623
20170421_MKY0381_04_patch02	19.08	RFP	220.59375	0.653909623
20170421_MKY0381_04_patch02	19.61	RFP	399.0625	0.653909623
20170421_MKY0381_04_patch02	20.14	RFP	375.21875	0.653909623
20170421_MKY0381_04_patch02	20.67	RFP	355.53125	0.653909623
20170421_MKY0381_04_patch02	21.2	RFP	352.9375	0.653909623
20170421_MKY0381_04_patch02	21.73	RFP	321	0.653909623
20170421_MKY0381_04_patch02	22.26	RFP	359.53125	0.653909623
20170421_MKY0381_04_patch02	22.79	RFP	318.625	0.653909623
20170421_MKY0381_04_patch02	23.32	RFP	307.46875	0.653909623
20170421_MKY0381_04_patch02	23.85	RFP	331.84375	0.653909623
20170421_MKY0381_04_patch02	24.38	RFP	316.46875	0.653909623
20170421_MKY0381_04_patch02	24.91	RFP	281.40625	0.653909623
20170421_MKY0381_04_patch02	25.44	RFP	314.46875	0.653909623
20170421_MKY0381_04_patch02	25.97	RFP	271.5	0.653909623
20170421_MKY0381_04_patch02	26.5	RFP	265.1875	0.653909623
20170421_MKY0381_04_patch02	27.03	RFP	346.5625	0.653909623
20170421_MKY0381_04_patch02	27.56	RFP	345.71875	0.653909623
20170421_MKY0381_04_patch02	28.09	RFP	260.28125	0.653909623
20170421_MKY0381_04_patch02	28.62	RFP	384.6875	0.653909623
20170421_MKY0381_04_patch02	29.15	RFP	376.875	0.653909623
20170421_MKY0381_04_patch02	29.68	RFP	366.34375	0.653909623
20170421_MKY0381_04_patch02	30.21	RFP	432.25	0.653909623
20170421_MKY0381_04_patch02	30.74	RFP	403.6875	0.653909623
20170421_MKY0381_04_patch02	31.27	RFP	313.65625	0.653909623
20170421_MKY0381_04_patch02	31.8	RFP	372.09375	0.653909623
20170421_MKY0381_04_patch02	32.33	RFP	338.125	0.653909623
20170421_MKY0381_04_patch02	32.86	RFP	381.03125	0.653909623
20170421_MKY0381_04_patch02	33.39	RFP	268.125	0.653909623
20170421_MKY0381_04_patch02	33.92	RFP	393.90625	0.653909623
20170421_MKY0381_04_patch02	34.45	RFP	363.59375	0.653909623
20170421_MKY0381_04_patch02	34.98	RFP	447.71875	0.653909623
20170421_MKY0381_04_patch02	35.51	RFP	239.84375	0.653909623
20170421_MKY0381_04_patch02	36.04	RFP	441.53125	0.653909623
20170421_MKY0381_04_patch02	36.57	RFP	414.5625	0.653909623
20170421_MKY0381_04_patch02	37.1	RFP	334.65625	0.653909623
20170421_MKY0381_04_patch02	37.63	RFP	295.5625	0.653909623
20170421_MKY0381_04_patch02	38.16	RFP	419.8125	0.653909623
20170421_MKY0381_04_patch02	38.69	RFP	331.84375	0.653909623
20170421_MKY0381_04_patch02	39.22	RFP	366.34375	0.653909623
20170421_MKY0381_04_patch02	39.75	RFP	333.625	0.653909623
20170421_MKY0381_04_patch02	40.28	RFP	378.90625	0.653909623
20170421_MKY0381_04_patch02	40.81	RFP	383.53125	0.653909623
20170421_MKY0381_04_patch02	41.34	RFP	311.6875	0.653909623
20170421_MKY0381_04_patch02	41.87	RFP	353.625	0.653909623
20170421_MKY0381_04_patch02	42.4	RFP	355.78125	0.653909623
20170421_MKY0381_04_patch02	42.93	RFP	284.625	0.653909623
20170421_MKY0381_04_patch02	43.46	RFP	341.25	0.653909623
20170421_MKY0381_04_patch02	43.99	RFP	325.53125	0.653909623
20170421_MKY0381_04_patch02	44.52	RFP	287.34375	0.653909623
20170421_MKY0381_04_patch02	45.05	RFP	293.9375	0.653909623
20170421_MKY0381_04_patch02	45.58	RFP	374.1875	0.653909623
20170421_MKY0381_04_patch02	46.11	RFP	287.8125	0.653909623
20170421_MKY0381_04_patch02	46.64	RFP	388.5625	0.653909623
20170421_MKY0381_04_patch02	47.17	RFP	308.03125	0.653909623
20170421_MKY0381_04_patch02	47.7	RFP	293.65625	0.653909623
20170421_MKY0381_04_patch02	48.23	RFP	325.375	0.653909623
20170421_MKY0381_04_patch02	48.76	RFP	228.90625	0.653909623
20170421_MKY0381_04_patch02	49.29	RFP	329.65625	0.653909623
20170421_MKY0381_04_patch02	49.82	RFP	278.875	0.653909623
20170421_MKY0381_04_patch02	50.35	RFP	316.8125	0.653909623
20170421_MKY0381_04_patch02	50.88	RFP	316.34375	0.653909623
20170421_MKY0381_04_patch02	51.41	RFP	336.96875	0.653909623
20170421_MKY0381_04_patch02	51.94	RFP	281.625	0.653909623
20170421_MKY0381_04_patch02	52.47	RFP	330.34375	0.653909623
20170421_MKY0381_04_patch02	53	RFP	400.90625	0.653909623
20170421_MKY0381_04_patch02	53.53	RFP	273.40625	0.653909623
20170421_MKY0381_04_patch02	54.06	RFP	238.59375	0.653909623
20170421_MKY0381_04_patch02	54.59	RFP	352.625	0.653909623
20170421_MKY0381_04_patch02	55.12	RFP	386.0625	0.653909623
20170421_MKY0381_04_patch02	55.65	RFP	311.03125	0.653909623
20170421_MKY0381_04_patch02	56.18	RFP	316.46875	0.653909623
20170421_MKY0381_04_patch02	56.71	RFP	275.1875	0.653909623
20170421_MKY0381_04_patch02	57.24	RFP	346.65625	0.653909623
20170421_MKY0381_04_patch02	57.77	RFP	393.75	0.653909623
20170421_MKY0381_04_patch02	58.3	RFP	372.71875	0.653909623
20170421_MKY0381_04_patch02	58.83	RFP	320.5	0.653909623
20170421_MKY0381_04_patch02	59.36	RFP	432.15625	0.653909623
20170421_MKY0381_04_patch02	59.89	RFP	375.625	0.653909623
20170421_MKY0381_04_patch02	60.42	RFP	417.1875	0.653909623
20170421_MKY0381_04_patch02	60.95	RFP	370	0.653909623
20170421_MKY0381_04_patch02	61.48	RFP	294.84375	0.653909623
20170421_MKY0381_04_patch02	62.01	RFP	301.5	0.653909623
20170421_MKY0381_04_patch02	62.54	RFP	348.40625	0.653909623
20170421_MKY0381_04_patch02	63.07	RFP	266.21875	0.653909623
20170421_MKY0381_04_patch02	63.6	RFP	333.75	0.653909623
20170421_MKY0381_04_patch02	64.13	RFP	310.9375	0.653909623
20170421_MKY0381_04_patch02	64.66	RFP	240.78125	0.653909623
20170421_MKY0381_04_patch02	65.19	RFP	329.90625	0.653909623
20170421_MKY0381_04_patch02	65.72	RFP	342.28125	0.653909623
20170421_MKY0381_04_patch02	66.25	RFP	292.3125	0.653909623
20170421_MKY0381_04_patch02	66.78	RFP	415.9375	0.653909623
20170421_MKY0381_04_patch02	67.31	RFP	458.1875	0.653909623
20170421_MKY0381_04_patch02	67.84	RFP	389.0625	0.653909623
20170421_MKY0381_04_patch02	68.37	RFP	346	0.653909623
20170421_MKY0381_04_patch02	68.9	RFP	488	0.653909623
20170421_MKY0381_04_patch02	69.43	RFP	382.9375	0.653909623
20170421_MKY0381_04_patch02	69.96	RFP	385.15625	0.653909623
20170421_MKY0381_04_patch02	70.49	RFP	387.34375	0.653909623
20170421_MKY0381_04_patch02	71.02	RFP	280.875	0.653909623
20170421_MKY0381_04_patch02	71.55	RFP	379.40625	0.653909623
20170421_MKY0381_04_patch02	72.08	RFP	391.125	0.653909623
20170421_MKY0381_04_patch02	72.61	RFP	423.25	0.653909623
20170421_MKY0381_04_patch02	73.14	RFP	388.5	0.653909623
20170421_MKY0381_04_patch02	73.67	RFP	414.5	0.653909623
20170421_MKY0381_04_patch02	74.2	RFP	440.15625	0.653909623
20170421_MKY0381_04_patch02	74.73	RFP	499.34375	0.653909623
20170421_MKY0381_04_patch02	75.26	RFP	322.46875	0.653909623
20170421_MKY0381_04_patch02	75.79	RFP	397.84375	0.653909623
20170421_MKY0381_04_patch02	76.32	RFP	415.5	0.653909623
20170421_MKY0381_04_patch02	76.85	RFP	294.71875	0.653909623
20170421_MKY0381_04_patch02	77.38	RFP	361.15625	0.653909623
20170421_MKY0381_04_patch02	77.91	RFP	400.21875	0.653909623
20170421_MKY0381_04_patch02	78.44	RFP	352	0.653909623
20170421_MKY0381_04_patch02	78.97	RFP	429.78125	0.653909623
20170421_MKY0381_04_patch02	79.5	RFP	408.71875	0.653909623
20170421_MKY0381_04_patch02	80.03	RFP	408.59375	0.653909623
20170421_MKY0381_04_patch02	80.56	RFP	395.375	0.653909623
20170421_MKY0381_04_patch02	81.09	RFP	306.125	0.653909623
20170421_MKY0381_04_patch02	81.62	RFP	314.84375	0.653909623
20170421_MKY0381_04_patch02	82.15	RFP	342.09375	0.653909623
20170421_MKY0381_04_patch02	82.68	RFP	379.125	0.653909623
20170421_MKY0381_04_patch02	83.21	RFP	302.46875	0.653909623
20170421_MKY0381_04_patch02	83.74	RFP	242.6875	0.653909623
20170421_MKY0381_04_patch02	84.27	RFP	355.96875	0.653909623
20170421_MKY0381_04_patch02	84.8	RFP	369.53125	0.653909623
20170421_MKY0381_04_patch02	85.33	RFP	311.65625	0.653909623
20170421_MKY0381_04_patch02	85.86	RFP	395.15625	0.653909623
20170421_MKY0381_04_patch02	86.39	RFP	321.40625	0.653909623
20170421_MKY0381_04_patch02	86.92	RFP	433.4375	0.653909623
20170421_MKY0381_04_patch02	87.45	RFP	388.15625	0.653909623
20170421_MKY0381_04_patch02	87.98	RFP	332.0625	0.653909623
20170421_MKY0381_04_patch02	88.51	RFP	368.84375	0.653909623
20170421_MKY0381_04_patch02	89.04	RFP	323.3125	0.653909623
20170421_MKY0381_04_patch02	89.57	RFP	328.34375	0.653909623
20170421_MKY0381_04_patch02	90.1	RFP	289.9375	0.653909623
20170421_MKY0381_04_patch02	90.63	RFP	357.15625	0.653909623
20170421_MKY0381_04_patch02	91.16	RFP	322.96875	0.653909623
20170421_MKY0381_04_patch02	91.69	RFP	389.25	0.653909623
20170421_MKY0381_04_patch02	92.22	RFP	422.15625	0.653909623
20170421_MKY0381_04_patch02	92.75	RFP	406.5625	0.653909623
20170421_MKY0381_04_patch02	93.28	RFP	386.34375	0.653909623
20170421_MKY0381_04_patch02	93.81	RFP	379	0.653909623
20170421_MKY0381_04_patch02	94.34	RFP	378.40625	0.653909623
20170421_MKY0381_04_patch02	94.87	RFP	349.3125	0.653909623
20170421_MKY0381_04_patch02	95.4	RFP	368.46875	0.653909623
20170421_MKY0381_04_patch02	95.93	RFP	327.4375	0.653909623
20170421_MKY0381_04_patch02	96.46	RFP	328.125	0.653909623
20170421_MKY0381_04_patch02	96.99	RFP	379.46875	0.653909623
20170421_MKY0381_04_patch02	97.52	RFP	311.59375	0.653909623
20170421_MKY0381_04_patch02	98.05	RFP	405.53125	0.653909623
20170421_MKY0381_04_patch02	98.58	RFP	257.1875	0.653909623
20170421_MKY0381_04_patch02	99.11	RFP	353.0625	0.653909623
20170421_MKY0381_04_patch02	99.64	RFP	442.03125	0.653909623
20170421_MKY0381_04_patch02	100.17	RFP	308.0625	0.653909623
20170421_MKY0381_04_patch02	100.7	RFP	407.5	0.653909623
20170421_MKY0381_04_patch02	101.23	RFP	409.75	0.653909623
20170421_MKY0381_04_patch02	101.76	RFP	353.6875	0.653909623
20170421_MKY0381_04_patch02	102.29	RFP	365.6875	0.653909623
20170421_MKY0381_04_patch02	102.82	RFP	395.90625	0.653909623
20170421_MKY0381_04_patch02	103.35	RFP	305.3125	0.653909623
20170421_MKY0381_04_patch02	103.88	RFP	333.46875	0.653909623
20170421_MKY0381_04_patch02	104.41	RFP	364.25	0.653909623
20170421_MKY0381_04_patch02	104.94	RFP	365.71875	0.653909623
20170421_MKY0381_04_patch02	105.47	RFP	409.125	0.653909623
20170421_MKY0381_04_patch02	106	RFP	312.1875	0.653909623
20170421_MKY0381_04_patch02	106.53	RFP	384.3125	0.653909623
20170421_MKY0381_04_patch02	107.06	RFP	409.3125	0.653909623
20170421_MKY0381_04_patch02	107.59	RFP	387.84375	0.653909623
20170421_MKY0381_04_patch02	108.12	RFP	353.40625	0.653909623
20170421_MKY0381_04_patch02	108.65	RFP	355.96875	0.653909623
20170421_MKY0381_04_patch02	109.18	RFP	364.71875	0.653909623
20170421_MKY0381_04_patch02	109.71	RFP	299.8125	0.653909623
20170421_MKY0381_04_patch02	110.24	RFP	402.9375	0.653909623
20170421_MKY0381_04_patch02	110.77	RFP	447.78125	0.653909623
20170421_MKY0381_04_patch02	111.3	RFP	408.09375	0.653909623
20170421_MKY0381_04_patch02	111.83	RFP	308.59375	0.653909623
20170421_MKY0381_04_patch02	112.36	RFP	364.9375	0.653909623
20170421_MKY0381_04_patch02	112.89	RFP	345.8125	0.653909623
20170421_MKY0381_04_patch02	113.42	RFP	295.8125	0.653909623
20170421_MKY0381_04_patch02	113.95	RFP	463.0625	0.653909623
20170421_MKY0381_04_patch02	114.48	RFP	354.03125	0.653909623
20170421_MKY0381_04_patch02	115.01	RFP	329.78125	0.653909623
20170421_MKY0381_04_patch02	115.54	RFP	373	0.653909623
20170421_MKY0381_04_patch02	116.07	RFP	382.59375	0.653909623
20170421_MKY0381_04_patch02	116.6	RFP	405.84375	0.653909623
20170421_MKY0381_04_patch02	117.13	RFP	408.34375	0.653909623
20170421_MKY0381_04_patch02	117.66	RFP	314.375	0.653909623
20170421_MKY0381_04_patch02	118.19	RFP	463.90625	0.653909623
20170421_MKY0381_04_patch02	118.72	RFP	346.65625	0.653909623
20170421_MKY0381_04_patch02	119.25	RFP	325.1875	0.653909623
20170421_MKY0381_04_patch02	119.78	RFP	400.21875	0.653909623
20170421_MKY0381_04_patch02	120.31	RFP	510.5	0.653909623
20170421_MKY0381_04_patch02	120.84	RFP	411.59375	0.653909623
20170421_MKY0381_04_patch02	121.37	RFP	325.25	0.653909623
20170421_MKY0381_04_patch02	121.9	RFP	316.5	0.653909623
20170421_MKY0381_04_patch02	122.43	RFP	383.875	0.653909623
20170421_MKY0381_04_patch02	122.96	RFP	466.5	0.653909623
20170421_MKY0381_04_patch02	123.49	RFP	466.3125	0.653909623
20170421_MKY0381_04_patch02	124.02	RFP	421.3125	0.653909623
20170421_MKY0381_04_patch02	124.55	RFP	437.96875	0.653909623
20170421_MKY0381_04_patch02	125.08	RFP	435.78125	0.653909623
20170421_MKY0381_04_patch02	125.61	RFP	421.15625	0.653909623
20170421_MKY0381_04_patch02	126.14	RFP	413.53125	0.653909623
20170421_MKY0381_04_patch02	126.67	RFP	365.0625	0.653909623
20170421_MKY0381_04_patch02	127.2	RFP	369.625	0.653909623
20170421_MKY0381_04_patch02	127.73	RFP	424.46875	0.653909623
20170421_MKY0381_04_patch02	128.26	RFP	337.375	0.653909623
20170421_MKY0381_04_patch02	128.79	RFP	434.15625	0.653909623
20170421_MKY0381_04_patch02	129.32	RFP	359.9375	0.653909623
20170421_MKY0381_04_patch02	129.85	RFP	383.03125	0.653909623
20170421_MKY0381_04_patch02	130.38	RFP	415.375	0.653909623
20170421_MKY0381_04_patch02	130.91	RFP	428.71875	0.653909623
20170421_MKY0381_04_patch02	131.44	RFP	404.9375	0.653909623
20170421_MKY0381_04_patch02	131.97	RFP	766.875	0.653909623
20170421_MKY0381_04_patch02	132.5	RFP	1043.4375	0.653909623
20170421_MKY0381_04_patch02	133.03	RFP	1346.65625	0.653909623
20170421_MKY0381_04_patch02	133.56	RFP	1461.28125	0.653909623
20170421_MKY0381_04_patch02	134.09	RFP	1591.75	0.653909623
20170421_MKY0381_04_patch02	134.62	RFP	1722	0.653909623
20170421_MKY0381_04_patch02	135.15	RFP	1883.375	0.653909623
20170421_MKY0381_04_patch02	135.68	RFP	2059.625	0.653909623
20170421_MKY0381_04_patch02	136.21	RFP	1701.65625	0.653909623
20170421_MKY0381_04_patch02	136.74	RFP	1793.125	0.653909623
20170421_MKY0381_05_patch03	-39.22	GFP	3124.5625	0.893162819
20170421_MKY0381_05_patch03	-38.69	GFP	2819.9375	0.792231341
20170421_MKY0381_05_patch03	-38.16	GFP	2712.71875	0.756706526
20170421_MKY0381_05_patch03	-37.63	GFP	2584.75	0.714306607
20170421_MKY0381_05_patch03	-37.1	GFP	2713.28125	0.756892899
20170421_MKY0381_05_patch03	-36.57	GFP	2807.53125	0.788120775
20170421_MKY0381_05_patch03	-36.04	GFP	2722.25	0.759864517
20170421_MKY0381_05_patch03	-35.51	GFP	2700.125	0.752533835
20170421_MKY0381_05_patch03	-34.98	GFP	2531.96875	0.696818582
20170421_MKY0381_05_patch03	-34.45	GFP	2602.375	0.720146303
20170421_MKY0381_05_patch03	-33.92	GFP	3022.21875	0.859253239
20170421_MKY0381_05_patch03	-33.39	GFP	2986.15625	0.847304641
20170421_MKY0381_05_patch03	-32.86	GFP	2963.5	0.83979794
20170421_MKY0381_05_patch03	-32.33	GFP	2707.21875	0.754884209
20170421_MKY0381_05_patch03	-31.8	GFP	2911.25	0.822485935
20170421_MKY0381_05_patch03	-31.27	GFP	3231.8125	0.928697989
20170421_MKY0381_05_patch03	-30.74	GFP	3108.3125	0.887778702
20170421_MKY0381_05_patch03	-30.21	GFP	2641.28125	0.733037121
20170421_MKY0381_05_patch03	-29.68	GFP	2488.71875	0.682488549
20170421_MKY0381_05_patch03	-29.15	GFP	2674.5	0.744043497
20170421_MKY0381_05_patch03	-28.62	GFP	2445	0.668003205
20170421_MKY0381_05_patch03	-28.09	GFP	2323.375	0.627705163
20170421_MKY0381_05_patch03	-27.56	GFP	2565.5	0.7079285
20170421_MKY0381_05_patch03	-27.03	GFP	2541.53125	0.699986928
20170421_MKY0381_05_patch03	-26.5	GFP	2435.5	0.664855567
20170421_MKY0381_05_patch03	-25.97	GFP	2415.15625	0.658115067
20170421_MKY0381_05_patch03	-25.44	GFP	2613.78125	0.723925539
20170421_MKY0381_05_patch03	-24.91	GFP	2640.375	0.732736853
20170421_MKY0381_05_patch03	-24.38	GFP	2626.9375	0.728284602
20170421_MKY0381_05_patch03	-23.85	GFP	3011.625	0.855743209
20170421_MKY0381_05_patch03	-23.32	GFP	3117.3125	0.890760675
20170421_MKY0381_05_patch03	-22.79	GFP	3335.59375	0.963083856
20170421_MKY0381_05_patch03	-22.26	GFP	3407.09375	0.986773969
20170421_MKY0381_05_patch03	-21.73	GFP	3389.78125	0.981037814
20170421_MKY0381_05_patch03	-21.2	GFP	3013.71875	0.856436931
20170421_MKY0381_05_patch03	-20.67	GFP	2665.8125	0.741165066
20170421_MKY0381_05_patch03	-20.14	GFP	2990.0625	0.8485989
20170421_MKY0381_05_patch03	-19.61	GFP	3303.59375	0.952481288
20170421_MKY0381_05_patch03	-19.08	GFP	3428.53125	0.993876862
20170421_MKY0381_05_patch03	-18.55	GFP	3045.125	0.866842772
20170421_MKY0381_05_patch03	-18.02	GFP	2871.1875	0.809212016
20170421_MKY0381_05_patch03	-17.49	GFP	3168.875	0.907844891
20170421_MKY0381_05_patch03	-16.96	GFP	3341.5	0.965040776
20170421_MKY0381_05_patch03	-16.43	GFP	2919.46875	0.825209055
20170421_MKY0381_05_patch03	-15.9	GFP	2873.03125	0.809822907
20170421_MKY0381_05_patch03	-15.37	GFP	2943	0.83300567
20170421_MKY0381_05_patch03	-14.84	GFP	2573.59375	0.710610204
20170421_MKY0381_05_patch03	-14.31	GFP	2573.59375	0.710610204
20170421_MKY0381_05_patch03	-13.78	GFP	2107.34375	0.556127474
20170421_MKY0381_05_patch03	-13.25	GFP	2785.875	0.780945404
20170421_MKY0381_05_patch03	-12.72	GFP	2844.65625	0.800421411
20170421_MKY0381_05_patch03	-12.19	GFP	2791.78125	0.782902324
20170421_MKY0381_05_patch03	-11.66	GFP	3024.0625	0.859864129
20170421_MKY0381_05_patch03	-11.13	GFP	2758.90625	0.772009842
20170421_MKY0381_05_patch03	-10.6	GFP	2907.9375	0.821388403
20170421_MKY0381_05_patch03	-10.07	GFP	2870.96875	0.809139538
20170421_MKY0381_05_patch03	-9.54	GFP	2777.09375	0.778035911
20170421_MKY0381_05_patch03	-9.01	GFP	3279.625	0.944539716
20170421_MKY0381_05_patch03	-8.48	GFP	3405.625	0.986287328
20170421_MKY0381_05_patch03	-7.95	GFP	3405.625	0.986287328
20170421_MKY0381_05_patch03	-7.42	GFP	3337.34375	0.963663684
20170421_MKY0381_05_patch03	-6.89	GFP	3797.5625	1.116148079
20170421_MKY0381_05_patch03	-6.36	GFP	3436.34375	0.996465379
20170421_MKY0381_05_patch03	-5.83	GFP	3639.46875	1.063766837
20170421_MKY0381_05_patch03	-5.3	GFP	3542.59375	1.031669219
20170421_MKY0381_05_patch03	-4.77	GFP	3467.34375	1.006736617
20170421_MKY0381_05_patch03	-4.24	GFP	3450.8125	1.001259314
20170421_MKY0381_05_patch03	-3.71	GFP	3343.96875	0.965858747
20170421_MKY0381_05_patch03	-3.18	GFP	3403.65625	0.985635022
20170421_MKY0381_05_patch03	-2.65	GFP	3073.625	0.876285684
20170421_MKY0381_05_patch03	-2.12	GFP	3593.21875	1.048442813
20170421_MKY0381_05_patch03	-1.59	GFP	3580.84375	1.044342601
20170421_MKY0381_05_patch03	-1.06	GFP	3662.625	1.071439203
20170421_MKY0381_05_patch03	-0.53	GFP	3662.625	1.071439203
20170421_MKY0381_05_patch03	0	GFP	428.875	0
20170421_MKY0381_05_patch03	0.53	GFP	761.6875	0.11027085
20170421_MKY0381_05_patch03	1.06	GFP	869.6875	0.146054517
20170421_MKY0381_05_patch03	1.59	GFP	1052.46875	0.206615474
20170421_MKY0381_05_patch03	2.12	GFP	1235.15625	0.26714537
20170421_MKY0381_05_patch03	2.65	GFP	1359.8125	0.308447757
20170421_MKY0381_05_patch03	3.18	GFP	1673.6875	0.412444039
20170421_MKY0381_05_patch03	3.71	GFP	1673.03125	0.412226604
20170421_MKY0381_05_patch03	4.24	GFP	1711.59375	0.425003527
20170421_MKY0381_05_patch03	4.77	GFP	1560.03125	0.374786286
20170421_MKY0381_05_patch03	5.3	GFP	1484.03125	0.349605186
20170421_MKY0381_05_patch03	5.83	GFP	1426.875	0.330667592
20170421_MKY0381_05_patch03	6.36	GFP	1363.5	0.309669537
20170421_MKY0381_05_patch03	6.89	GFP	1730.90625	0.431402342
20170421_MKY0381_05_patch03	7.42	GFP	1709.59375	0.424340866
20170421_MKY0381_05_patch03	7.95	GFP	2035.03125	0.532168155
20170421_MKY0381_05_patch03	8.48	GFP	2155.65625	0.572134867
20170421_MKY0381_05_patch03	9.01	GFP	2440.8125	0.666615759
20170421_MKY0381_05_patch03	9.54	GFP	2703.03125	0.753496764
20170421_MKY0381_05_patch03	10.07	GFP	2566.4375	0.708239122
20170421_MKY0381_05_patch03	10.6	GFP	2415.0625	0.658084005
20170421_MKY0381_05_patch03	11.13	GFP	2398.3125	0.652534223
20170421_MKY0381_05_patch03	11.66	GFP	2567.21875	0.708497974
20170421_MKY0381_05_patch03	12.19	GFP	2640	0.732612604
20170421_MKY0381_05_patch03	12.72	GFP	2588.28125	0.715476617
20170421_MKY0381_05_patch03	13.25	GFP	3066.78125	0.874018143
20170421_MKY0381_05_patch03	13.78	GFP	3134.5	0.896455413
20170421_MKY0381_05_patch03	14.31	GFP	3148.59375	0.901125099
20170421_MKY0381_05_patch03	14.84	GFP	3551.84375	1.034734023
20170421_MKY0381_05_patch03	15.37	GFP	3529.03125	1.027175552
20170421_MKY0381_05_patch03	15.9	GFP	3268.5625	0.940874375
20170421_MKY0381_05_patch03	16.43	GFP	3406.6875	0.986639366
20170421_MKY0381_05_patch03	16.96	GFP	3200.75	0.918406043
20170421_MKY0381_05_patch03	17.49	GFP	3189.90625	0.91481318
20170421_MKY0381_05_patch03	18.02	GFP	2994.34375	0.850017408
20170421_MKY0381_05_patch03	18.55	GFP	2951.40625	0.835790915
20170421_MKY0381_05_patch03	19.08	GFP	2798.125	0.7850042
20170421_MKY0381_05_patch03	19.61	GFP	2559.96875	0.70609583
20170421_MKY0381_05_patch03	20.14	GFP	2523.46875	0.694002275
20170421_MKY0381_05_patch03	20.67	GFP	2697.46875	0.751653739
20170421_MKY0381_05_patch03	21.2	GFP	2315.90625	0.62523054
20170421_MKY0381_05_patch03	21.73	GFP	2757.40625	0.771512846
20170421_MKY0381_05_patch03	22.26	GFP	2915.9375	0.824039045
20170421_MKY0381_05_patch03	22.79	GFP	2959.96875	0.83862793
20170421_MKY0381_05_patch03	23.32	GFP	2837.875	0.798174577
20170421_MKY0381_05_patch03	23.85	GFP	2670.0625	0.742573219
20170421_MKY0381_05_patch03	24.38	GFP	2888.34375	0.814896401
20170421_MKY0381_05_patch03	24.91	GFP	2410.25	0.656489478
20170421_MKY0381_05_patch03	25.44	GFP	2649.6875	0.735822366
20170421_MKY0381_05_patch03	25.97	GFP	2829.90625	0.795534289
20170421_MKY0381_05_patch03	26.5	GFP	3195.78125	0.916759745
20170421_MKY0381_05_patch03	27.03	GFP	3243.6875	0.932632535
20170421_MKY0381_05_patch03	27.56	GFP	2967.65625	0.841175032
20170421_MKY0381_05_patch03	28.09	GFP	3285.9375	0.946631238
20170421_MKY0381_05_patch03	28.62	GFP	3572.34375	1.041526294
20170421_MKY0381_05_patch03	29.15	GFP	3545.65625	1.032683917
20170421_MKY0381_05_patch03	29.68	GFP	3550.78125	1.034381985
20170421_MKY0381_05_patch03	30.21	GFP	2894.9375	0.81708111
20170421_MKY0381_05_patch03	30.74	GFP	3326.09375	0.959936219
20170421_MKY0381_05_patch03	31.27	GFP	3710.4375	1.087280931
20170421_MKY0381_05_patch03	31.8	GFP	3466.09375	1.006322454
20170421_MKY0381_05_patch03	32.33	GFP	3375.78125	0.976399191
20170421_MKY0381_05_patch03	32.86	GFP	3154.78125	0.903175205
20170421_MKY0381_05_patch03	33.39	GFP	2982.65625	0.846144985
20170421_MKY0381_05_patch03	33.92	GFP	3010.625	0.855411878
20170421_MKY0381_05_patch03	34.45	GFP	2981.96875	0.845917196
20170421_MKY0381_05_patch03	34.98	GFP	2898.96875	0.818416785
20170421_MKY0381_05_patch03	35.51	GFP	3262	0.938700021
20170421_MKY0381_05_patch03	36.04	GFP	2885.875	0.814078429
20170421_MKY0381_05_patch03	36.57	GFP	2847.75	0.801446464
20170421_MKY0381_05_patch03	37.1	GFP	2964.90625	0.840263873
20170421_MKY0381_05_patch03	37.63	GFP	2809.125	0.788648833
20170421_MKY0381_05_patch03	38.16	GFP	2631.09375	0.729661694
20170421_MKY0381_05_patch03	38.69	GFP	2901.53125	0.819265819
20170421_MKY0381_05_patch03	39.22	GFP	3018.8125	0.858124645
20170421_MKY0381_05_patch03	39.75	GFP	2985.90625	0.847221809
20170421_MKY0381_05_patch03	40.28	GFP	2997.0625	0.850918212
20170421_MKY0381_05_patch03	40.81	GFP	3131.875	0.895585672
20170421_MKY0381_05_patch03	41.34	GFP	2836.625	0.797760415
20170421_MKY0381_05_patch03	41.87	GFP	3081.78125	0.878988097
20170421_MKY0381_05_patch03	42.4	GFP	3006.09375	0.853910538
20170421_MKY0381_05_patch03	42.93	GFP	2893.09375	0.81647022
20170421_MKY0381_05_patch03	43.46	GFP	3120.34375	0.89176502
20170421_MKY0381_05_patch03	43.99	GFP	2830.4375	0.795710309
20170421_MKY0381_05_patch03	44.52	GFP	2905.96875	0.820736097
20170421_MKY0381_05_patch03	45.05	GFP	2849.84375	0.802140186
20170421_MKY0381_05_patch03	45.58	GFP	2962.03125	0.839311299
20170421_MKY0381_05_patch03	46.11	GFP	3096.9375	0.884009821
20170421_MKY0381_05_patch03	46.64	GFP	3323.8125	0.959180372
20170421_MKY0381_05_patch03	47.17	GFP	3238.5	0.93091376
20170421_MKY0381_05_patch03	47.7	GFP	3177.78125	0.910795801
20170421_MKY0381_05_patch03	48.23	GFP	2889.875	0.815403751
20170421_MKY0381_05_patch03	48.76	GFP	3279.125	0.944374051
20170421_MKY0381_05_patch03	49.29	GFP	3353.59375	0.969047801
20170421_MKY0381_05_patch03	49.82	GFP	3227.21875	0.92717594
20170421_MKY0381_05_patch03	50.35	GFP	3196.375	0.916956473
20170421_MKY0381_05_patch03	50.88	GFP	3124.96875	0.893297422
20170421_MKY0381_05_patch03	51.41	GFP	2893.25	0.81652199
20170421_MKY0381_05_patch03	51.94	GFP	2723.375	0.760237264
20170421_MKY0381_05_patch03	52.47	GFP	3061.6875	0.872330429
20170421_MKY0381_05_patch03	53	GFP	3044.8125	0.866739231
20170421_MKY0381_05_patch03	53.53	GFP	2933.5625	0.829878741
20170421_MKY0381_05_patch03	54.06	GFP	3188.875	0.914471496
20170421_MKY0381_05_patch03	54.59	GFP	2999.78125	0.851819016
20170421_MKY0381_05_patch03	55.12	GFP	3145.78125	0.900193233
20170421_MKY0381_05_patch03	55.65	GFP	3089.59375	0.881576614
20170421_MKY0381_05_patch03	56.18	GFP	2854.625	0.803724359
20170421_MKY0381_05_patch03	56.71	GFP	2954.09375	0.836681365
20170421_MKY0381_05_patch03	57.24	GFP	2774.5	0.777176523
20170421_MKY0381_05_patch03	57.77	GFP	2832.21875	0.796300491
20170421_MKY0381_05_patch03	58.3	GFP	2817.71875	0.791496202
20170421_MKY0381_05_patch03	58.83	GFP	2812.8125	0.789870613
20170421_MKY0381_05_patch03	59.36	GFP	2663.375	0.740357448
20170421_MKY0381_05_patch03	59.89	GFP	3170.8125	0.908486843
20170421_MKY0381_05_patch03	60.42	GFP	3261.84375	0.93864825
20170421_MKY0381_05_patch03	60.95	GFP	3243.96875	0.932725722
20170421_MKY0381_05_patch03	61.48	GFP	3244.21875	0.932808555
20170421_MKY0381_05_patch03	62.01	GFP	2875.65625	0.810692648
20170421_MKY0381_05_patch03	62.54	GFP	3095.125	0.883409285
20170421_MKY0381_05_patch03	63.07	GFP	2997.875	0.851187418
20170421_MKY0381_05_patch03	63.6	GFP	3168.5625	0.90774135
20170421_MKY0381_05_patch03	64.13	GFP	3279.1875	0.944394759
20170421_MKY0381_05_patch03	64.66	GFP	2953.53125	0.836494992
20170421_MKY0381_05_patch03	65.19	GFP	2741.90625	0.766377227
20170421_MKY0381_05_patch03	65.72	GFP	2565.6875	0.707990624
[truncated: 12,401 more rows]
