# Supplementary material for: Condensation of Ede1 promotes the initiation of endocytosis
Source: eLife. 2022 Apr 12;11:e72865. doi: 10.7554/eLife.72865 (PMC9064294; doi:10.7554/eLife.72865)
Supplement: Figure 2—source data 3. [file elife-72865-fig2-data3.csv]

id	time	spot	condensate	background	normalized_recovery
20191122_MKY1037_01	-2	946.2857143	897.5857143	201.4913864	0.990340935
20191122_MKY1037_01	-1.9	910.3333333	857.8571429	201.4741591	1.016064245
20191122_MKY1037_01	-1.8	913.3809524	855.6142857	201.4315012	1.037589447
20191122_MKY1037_01	-1.7	907.1904762	856.8142857	201.3634126	1.00810385
20191122_MKY1037_01	-1.6	902.952381	845.0142857	201.416735	1.042016792
20191122_MKY1037_01	-1.5	913.7142857	849.8	201.3757178	1.064032302
20191122_MKY1037_01	-1.4	895.952381	854.9285714	201.4388843	0.971831663
20191122_MKY1037_01	-1.3	893.1904762	843.7571429	201.561936	1.008408455
20191122_MKY1037_01	-1.2	892.5238095	845.1571429	201.3076292	0.999630353
20191122_MKY1037_01	-1.1	900.3333333	849.8714286	201.435603	1.010586244
20191122_MKY1037_01	-1	891.8095238	844.5714286	201.3888433	0.999311921
20191122_MKY1037_01	-0.9	880.1428571	835.8428571	201.3347006	0.989970183
20191122_MKY1037_01	-0.8	880.8571429	843.2571429	201.3831009	0.961017462
20191122_MKY1037_01	-0.7	877.2380952	836.8	201.3831009	0.974056652
20191122_MKY1037_01	-0.6	877.3333333	838.1	201.3297785	0.968834464
20191122_MKY1037_01	-0.5	885.1904762	835.4142857	201.2936833	1.012326181
20191122_MKY1037_01	-0.4	878.952381	826.6714286	201.295324	1.02547104
20191122_MKY1037_01	-0.3	886.6190476	823.5142857	201.3092699	1.071380496
20191122_MKY1037_01	0	398.4761905	488.9142857	201.340443	0
20191122_MKY1037_01	0.1	403	493.8428571	201.2502051	0.01033233
20191122_MKY1037_01	0.2	409.4285714	496.4428571	201.1771944	0.050974575
20191122_MKY1037_01	0.3	410.4761905	490.7714286	201.1493027	0.095943668
20191122_MKY1037_01	0.4	412.5238095	492.0142857	201.171452	0.106068967
20191122_MKY1037_01	0.5	409.4285714	486.6714286	201.09516	0.113359327
20191122_MKY1037_01	0.6	411.6190476	488.6142857	201.2009844	0.120032081
20191122_MKY1037_01	0.7	416.6190476	487.9142857	201.2879409	0.16936517
20191122_MKY1037_01	0.8	414.6666667	487.1571429	201.3494668	0.156757024
20191122_MKY1037_01	0.9	411.5238095	480.4285714	201.2649713	0.174294529
20191122_MKY1037_01	1	418.5238095	483.4714286	201.1936013	0.217421274
20191122_MKY1037_01	1.1	424.2380952	483.6285714	201.0672683	0.268678279
20191122_MKY1037_01	1.2	424.5714286	482.5285714	201.2936833	0.279253423
20191122_MKY1037_01	1.3	417.9047619	479.5142857	201.1501231	0.239979248
20191122_MKY1037_01	1.4	431.8571429	482.8428571	201.2477441	0.343706493
20191122_MKY1037_01	1.5	433.7619048	478.7714286	201.1870386	0.392426986
20191122_MKY1037_01	1.6	430.5238095	476.5428571	201.1616079	0.379641899
20191122_MKY1037_01	1.7	426.5238095	473.0857143	201.1041838	0.369119479
20191122_MKY1037_01	1.8	426.6190476	476.1571429	201.2305168	0.345957308
20191122_MKY1037_01	1.9	432.9047619	481.7714286	201.0311731	0.361730136
20191122_MKY1037_01	2	425.1904762	478.8	201.1648893	0.31270918
20191122_MKY1037_01	2.1	424.3333333	476.2857143	200.9696473	0.324024517
20191122_MKY1037_01	2.2	424.3333333	477.9428571	201.1894996	0.311124402
20191122_MKY1037_01	2.3	428.5238095	477.0714286	201.0697293	0.357009704
20191122_MKY1037_01	2.4	429.7142857	479.5714286	201.2846596	0.348608462
20191122_MKY1037_01	2.5	432.952381	479.1428571	201.1542248	0.382090984
20191122_MKY1037_01	2.6	443.3333333	486.7857143	201.1419196	0.41825481
20191122_MKY1037_01	2.7	438.3333333	482.4	201.2026251	0.4064311
20191122_MKY1037_01	2.8	437.2380952	478.6857143	201.1091058	0.425470967
20191122_MKY1037_01	2.9	440.2857143	478.5857143	201.1197703	0.454540182
20191122_MKY1037_01	3	447.8571429	483.8142857	201.1903199	0.482383879
20191122_MKY1037_01	3.1	452.3333333	485.3571429	201.1132075	0.510835511
20191122_MKY1037_01	3.2	452.2380952	487.4	201.266612	0.493562926
20191122_MKY1037_01	3.3	453	484.7142857	201.09516	0.522070104
20191122_MKY1037_01	3.4	455.5714286	488.2142857	201.1509434	0.517193471
20191122_MKY1037_01	3.5	459.8095238	492.9	201.11895	0.517977854
20191122_MKY1037_01	3.6	464.4285714	492.9142857	201.2001641	0.558573556
20191122_MKY1037_01	3.7	455.8571429	484.5285714	201.1763741	0.549461909
20191122_MKY1037_01	3.8	458.7142857	486.8285714	201.0984413	0.556654109
20191122_MKY1037_01	3.9	461.1904762	488.4285714	201.2477441	0.565793899
20191122_MKY1037_01	4	456.8571429	485.4714286	201.1304348	0.550886034
20191122_MKY1037_01	4.1	447.9047619	478.9857143	201.1222313	0.521974962
20191122_MKY1037_01	4.2	446.7142857	481.0428571	201.1624282	0.494160535
20191122_MKY1037_01	4.3	451	480.3857143	201.2461034	0.538936551
20191122_MKY1037_01	4.4	447.952381	478.7714286	201.1525841	0.524151244
20191122_MKY1037_01	4.5	451.9047619	483.5	201.2395406	0.521770044
20191122_MKY1037_01	4.6	457.952381	483.9857143	201.1566858	0.573007513
20191122_MKY1037_01	4.7	457.5238095	485.0142857	201.2182116	0.560589052
20191122_MKY1037_01	4.8	463.6190476	482.9285714	201.2420016	0.633534646
20191122_MKY1037_01	4.9	458.1428571	482.2714286	201.0935193	0.589065595
20191122_MKY1037_01	5	451	480.2	200.9819524	0.54072609
20191122_MKY1037_01	5.1	449.7619048	479.6142857	201.0549631	0.534056083
20191122_MKY1037_01	5.2	458.5714286	483.9285714	201.1025431	0.579163803
20191122_MKY1037_01	5.3	455.952381	481.3857143	201.1936013	0.576292261
20191122_MKY1037_01	5.4	447.7619048	483.0857143	201.0459393	0.487489579
20191122_MKY1037_01	5.5	438	476.9285714	201.1747334	0.44646054
20191122_MKY1037_01	5.6	436.4761905	474.2428571	201.0664479	0.453985968
20191122_MKY1037_01	5.7	437.5238095	473.8285714	201.0861362	0.467226747
20191122_MKY1037_01	5.8	447.5238095	479.7857143	201.1550451	0.511850162
20191122_MKY1037_01	5.9	449.8095238	475.8571429	201.0344545	0.565965899
20191122_MKY1037_01	6	450.1428571	473.5857143	201.0328138	0.588551259
20191122_MKY1037_01	6.1	458.8571429	476.5428571	201.1886792	0.644664824
20191122_MKY1037_01	6.2	460.3333333	473.4714286	201.2625103	0.685788735
20191122_MKY1037_01	6.3	465.5238095	477.4857143	201.1091058	0.698626447
20191122_MKY1037_01	6.4	463.8571429	477.0571429	201.1435603	0.686880145
20191122_MKY1037_01	6.5	461.3809524	476.7714286	201.1501231	0.666276881
20191122_MKY1037_01	6.6	466.7619048	474.7428571	201.2083675	0.734958539
20191122_MKY1037_01	6.7	467.6666667	475.8428571	201.2034454	0.733429669
20191122_MKY1037_01	6.8	465.8571429	475.5142857	201.1771944	0.719439121
20191122_MKY1037_01	6.9	466.5714286	472.9428571	201.2772765	0.749703411
20191122_MKY1037_01	7	463.3809524	477.5285714	201.050041	0.678302813
20191122_MKY1037_01	7.1	455.7142857	473.9285714	201.0525021	0.63817244
20191122_MKY1037_01	7.2	464.7619048	478.9142857	201.1353569	0.678875739
20191122_MKY1037_01	7.3	463.9047619	476.9285714	201.0377358	0.688515083
20191122_MKY1037_01	7.4	475.3333333	476.9857143	201.2337982	0.794682866
20191122_MKY1037_01	7.5	470.5238095	473.8714286	201.2034454	0.778492676
20191122_MKY1037_01	7.6	472.5238095	474.2714286	201.1009024	0.793638901
20191122_MKY1037_01	7.7	467.7142857	470.3571429	201.0787531	0.784836557
20191122_MKY1037_01	7.8	471.8571429	472.9428571	201.216571	0.799826264
20191122_MKY1037_01	7.9	472.2857143	469.7857143	201.0746514	0.834085311
20191122_MKY1037_01	8	475.1904762	471.9857143	201.1296144	0.840598223
20191122_MKY1037_01	8.1	474.3333333	469.4714286	201.242822	0.856811606
20191122_MKY1037_01	8.2	468	468.6	201.1763741	0.80433939
20191122_MKY1037_01	8.3	461.1428571	466.5285714	201.0631665	0.757857461
20191122_MKY1037_01	8.4	453.4285714	459.7	201.1222313	0.74764172
20191122_MKY1037_01	8.5	460	461.6428571	201.1878589	0.793870473
20191122_MKY1037_01	8.6	452.7142857	456.7428571	201.0180476	0.769537786
20191122_MKY1037_01	8.7	455.7619048	461.2428571	201.0442986	0.75585673
20191122_MKY1037_01	8.8	461.8095238	461.2571429	201.0525021	0.815587525
20191122_MKY1037_01	8.9	461.7142857	458.3	201.1681706	0.844324092
20191122_MKY1037_01	9	466.5714286	461.9285714	201.271534	0.856003143
20191122_MKY1037_01	9.1	457.8571429	456.6571429	201.1665299	0.822218097
20191122_MKY1037_01	9.2	460.2380952	455.8714286	201.0467596	0.854261338
20191122_MKY1037_01	9.3	459.952381	454.6	201.2354389	0.864537668
20191122_MKY1037_01	9.4	463.6666667	453.5285714	201.0270714	0.913547251
20191122_MKY1037_01	9.5	462.7619048	455.7285714	201.219032	0.881306527
20191122_MKY1037_01	9.6	457.8571429	453.6857143	201.1755537	0.852674207
20191122_MKY1037_01	9.7	459.2857143	452.0428571	201.2633306	0.884517574
20191122_MKY1037_01	9.8	453.6190476	454.5285714	201.0533224	0.800875734
20191122_MKY1037_01	9.9	449.6190476	454.6142857	200.9893355	0.759383606
20191122_MKY1037_01	10	454.8571429	453.0142857	201.0623462	0.828960726
20191122_MKY1037_01	10.1	451.6190476	453.2714286	201.1025431	0.793239267
20191122_MKY1037_01	10.2	455.5238095	456.4	201.0533224	0.801279753
20191122_MKY1037_01	10.3	459.8095238	452.9285714	201.1082855	0.88050797
20191122_MKY1037_01	10.4	455.3333333	453.4571429	201.0894176	0.829269928
20191122_MKY1037_01	10.5	452.7142857	455.3142857	201.2157506	0.783760661
20191122_MKY1037_01	10.6	447.8571429	451.3428571	201.221493	0.774219547
20191122_MKY1037_01	10.7	447.5714286	451.6571429	201.0639869	0.768119356
20191122_MKY1037_01	10.8	440.7619048	452.2	201.073831	0.692789143
20191122_MKY1037_01	10.9	455.6190476	455.7714286	201.147662	0.808577372
20191122_MKY1037_01	11	442.9047619	447.1857143	201.0705496	0.765311693
20191122_MKY1037_01	11.1	436.5238095	445.9142857	201.195242	0.711271281
20191122_MKY1037_01	11.2	429.8095238	443.4857143	200.9712879	0.664849526
20191122_MKY1037_01	11.3	438.047619	449.5714286	201.0680886	0.690662264
20191122_MKY1037_01	11.4	438.1428571	445.9857143	201.0812141	0.727624623
20191122_MKY1037_01	11.5	440.3809524	448.7	201.1575062	0.723548355
20191122_MKY1037_01	11.6	436.6666667	449.6571429	201.0598852	0.675509553
20191122_MKY1037_01	11.7	431.2857143	443.5428571	201.073831	0.679898373
20191122_MKY1037_01	11.8	437.9047619	446.7428571	201.0098441	0.717469735
20191122_MKY1037_01	11.9	438.5714286	446.2285714	201.3839212	0.729558354
20191122_MKY1037_01	12	442.1428571	444.9	201.1771944	0.780977632
20191122_MKY1037_01	12.1	449.2857143	446.5857143	201.0278917	0.83844314
20191122_MKY1037_01	12.2	442.9047619	446.2142857	201.1665299	0.775328424
20191122_MKY1037_01	12.3	446.1428571	445.6857143	201.2272354	0.814936185
20191122_MKY1037_01	12.4	453.3333333	447.4571429	201.1460213	0.871574196
20191122_MKY1037_01	12.5	450.9047619	444.7	201.0541427	0.875720362
20191122_MKY1037_01	12.6	452.3333333	445	201.0705496	0.887562319
20191122_MKY1037_01	12.7	452.7142857	445.2428571	201.2009844	0.88898432
20191122_MKY1037_01	12.8	445.047619	445.0142857	201.1837572	0.810471154
20191122_MKY1037_01	12.9	441	441.8571429	201.3305989	0.800939117
20191122_MKY1037_01	13	447.4761905	444.5428571	201.0114848	0.841146961
20191122_MKY1037_01	13.1	452.7142857	447.2428571	201.1607875	0.86739432
20191122_MKY1037_01	13.2	454.9047619	449.9	201.1320755	0.861943581
20191122_MKY1037_01	13.3	450.2380952	447	201.0319934	0.844031339
20191122_MKY1037_01	13.4	444.2857143	443.9857143	201.2657916	0.81330292
20191122_MKY1037_01	13.5	451.8095238	448.5428571	201.0680886	0.844122267
20191122_MKY1037_01	13.6	454.952381	451.8428571	201.2789171	0.842087485
20191122_MKY1037_01	13.7	448.0952381	448.8857143	201.1534044	0.801899354
20191122_MKY1037_01	13.8	440.1904762	445.0285714	201.04758	0.759037312
20191122_MKY1037_01	13.9	442.7619048	444.1428571	201.1173093	0.795481272
20191122_MKY1037_01	14	441.9047619	444.6142857	201.0607055	0.781461038
20191122_MKY1037_01	14.1	430	439.4142857	201.2026251	0.708313518
20191122_MKY1037_01	14.2	431.0952381	438.6142857	201.2739951	0.728509978
20191122_MKY1037_01	14.3	439	440.2857143	201.1337162	0.796270034
20191122_MKY1037_01	14.4	435.3809524	435.9571429	201.1493027	0.803797786
20191122_MKY1037_01	14.5	442.4285714	439.7285714	201.0959803	0.83926512
20191122_MKY1037_01	14.6	434.5714286	437.9	201.07137	0.773913837
20191122_MKY1037_01	14.7	445.2857143	443.3	201.0894176	0.831237855
20191122_MKY1037_01	14.8	439.9047619	438.2571429	201.2567678	0.828027305
20191122_MKY1037_01	14.9	433.8095238	438.2142857	201.2198523	0.762241539
20191122_MKY1037_01	15	429.2857143	439.3857143	201.0746514	0.700943806
20191122_MKY1037_01	15.1	427.3333333	437.0714286	201.100082	0.703812076
20191122_MKY1037_01	15.2	427.5714286	437.9571429	201.1509434	0.697141982
20191122_MKY1037_01	15.3	431.8571429	439.9	201.0106645	0.723390787
20191122_MKY1037_01	15.4	434.0952381	437.9142857	201.09516	0.768577218
20191122_MKY1037_01	15.5	433.8095238	440.4571429	201.366694	0.738496297
20191122_MKY1037_01	15.6	433.8571429	440.2285714	201.0926989	0.741485065
20191122_MKY1037_01	15.7	434.3333333	439.6285714	201.1041838	0.75293171
20191122_MKY1037_01	15.8	431.1904762	436.3571429	200.9819524	0.753573692
20191122_MKY1037_01	15.9	432.5238095	439.0571429	201.1312551	0.739383093
20191122_MKY1037_01	16	432.5714286	441.5285714	201.1074651	0.714147183
20191122_MKY1037_01	16.1	432.2857143	437.2428571	201.1607875	0.756029216
20191122_MKY1037_01	16.2	440.3333333	442.0142857	201.1394586	0.792142263
20191122_MKY1037_01	16.3	435.5238095	439.2142857	201.0861362	0.770196429
20191122_MKY1037_01	16.4	437.8095238	439.7857143	201.1566858	0.788785978
20191122_MKY1037_01	16.5	433.2380952	436.3571429	201.2116489	0.775950007
20191122_MKY1037_01	16.6	434.8095238	438.1428571	201.1337162	0.773889655
20191122_MKY1037_01	16.7	429.4285714	436.6285714	201.1115669	0.731367826
20191122_MKY1037_01	16.8	428.4285714	432.9142857	201.1665299	0.760257781
20191122_MKY1037_01	16.9	432	435.5428571	201.171452	0.771179009
20191122_MKY1037_01	17	438.1428571	439.9428571	201.1320755	0.790702746
20191122_MKY1037_01	17.1	431.047619	436.0285714	201.2034454	0.755478503
20191122_MKY1037_01	17.2	434.4761905	434.4285714	201.0861362	0.810644691
20191122_MKY1037_01	17.3	442.5238095	439.6142857	201.1607875	0.841550489
20191122_MKY1037_01	17.4	440.0952381	436.7571429	201.0401969	0.846598986
20191122_MKY1037_01	17.5	439.047619	431.1571429	201.1681706	0.898496757
20191122_MKY1037_01	17.6	443.2380952	434.6714286	201.02379	0.904567974
20191122_MKY1037_01	17.7	444.047619	434.4428571	201.2034454	0.916198495
20191122_MKY1037_01	17.8	431.2380952	432.7857143	200.9893355	0.792919956
20191122_MKY1037_01	17.9	422.7142857	429.6857143	201.1410993	0.73154161
20191122_MKY1037_02	-1.3	1117.238095	992.9096045	201.7872074	0.971056723
20191122_MKY1037_02	-1.2	1086.571429	955.7740113	201.708612	0.999788129
20191122_MKY1037_02	-1.1	1063.190476	948.8983051	201.6279264	0.963639628
20191122_MKY1037_02	-1	1061.047619	948.0621469	201.6396321	0.960860416
20191122_MKY1037_02	-0.9	1062.047619	945.4971751	201.6233278	0.970221014
20191122_MKY1037_02	-0.8	1067.095238	944.2033898	201.6797659	0.985775267
20191122_MKY1037_02	-0.7	1064.857143	941.8305085	201.5865385	0.986994499
20191122_MKY1037_02	-0.6	1073.619048	936.7457627	201.5785953	1.022212899
20191122_MKY1037_02	-0.5	1058.904762	926.1355932	201.5079431	1.017003346
20191122_MKY1037_02	-0.4	1058.238095	920.4689266	201.4874582	1.031796024
20191122_MKY1037_02	-0.3	1068	930.1468927	201.4740803	1.02750738
20191122_MKY1037_02	0	430.4761905	579.2033898	201.5397157	0
20191122_MKY1037_02	0.1	433.2857143	581.4915254	201.4272575	0.006801816
20191122_MKY1037_02	0.2	437.2380952	582.1242938	201.5112876	0.023164514
20191122_MKY1037_02	0.3	436.3809524	581.8531073	201.4055184	0.020158287
20191122_MKY1037_02	0.4	449.2380952	578.2711864	201.4055184	0.090632885
20191122_MKY1037_02	0.5	449.3333333	575.8644068	201.4531773	0.098454818
20191122_MKY1037_02	0.6	450.5238095	572.3446328	201.3536789	0.11534065
20191122_MKY1037_02	0.7	454.8095238	574.0169492	201.5004181	0.130075418
20191122_MKY1037_02	0.8	461.0952381	573.180791	201.4339465	0.162672848
20191122_MKY1037_02	0.9	464.6666667	572.8983051	201.4063545	0.18059238
20191122_MKY1037_02	1	465.5238095	574.0112994	201.4314381	0.180881429
20191122_MKY1037_02	1.1	467.8571429	573.7344633	201.3072742	0.193023395
20191122_MKY1037_02	1.2	470.4285714	572.1299435	201.4021739	0.210579376
20191122_MKY1037_02	1.3	479.9047619	571.559322	201.4059365	0.257666625
20191122_MKY1037_02	1.4	478.3809524	573.8531073	201.5710702	0.242088551
20191122_MKY1037_02	1.5	475.5238095	573.480226	201.3595318	0.230126399
20191122_MKY1037_02	1.6	479.8095238	571.2881356	201.4657191	0.258114586
20191122_MKY1037_02	1.7	479.3333333	567.9887006	201.4176421	0.267821898
20191122_MKY1037_02	1.8	483.0952381	570.6384181	201.3528428	0.276263259
20191122_MKY1037_02	1.9	489.3333333	570.9322034	201.3085284	0.304989606
20191122_MKY1037_02	2	486.8571429	569.7288136	201.3503344	0.29758482
20191122_MKY1037_02	2.1	493.8095238	570.7231638	201.3235786	0.327107641
20191122_MKY1037_02	2.2	496.0952381	568.3446328	201.4000836	0.347055279
20191122_MKY1037_02	2.3	495.0952381	564.3785311	201.2629599	0.357792723
20191122_MKY1037_02	2.4	502.9047619	565.5367232	201.3256689	0.390990985
20191122_MKY1037_02	2.5	492.2380952	566.0508475	201.264214	0.337449075
20191122_MKY1037_02	2.6	498.8571429	568.5932203	201.4138796	0.359341174
20191122_MKY1037_02	2.7	509.7142857	567.440678	201.3524247	0.416162172
20191122_MKY1037_02	2.8	510.6666667	568.6327684	201.3382107	0.415924674
20191122_MKY1037_02	2.9	509.1428571	569.9548023	201.451505	0.403225997
20191122_MKY1037_02	3	513.6190476	568.4915254	201.3227425	0.430679302
20191122_MKY1037_02	3.1	514.0952381	568.6666667	201.3867057	0.432203683
20191122_MKY1037_02	3.2	525.6190476	572.1412429	201.1571906	0.473058653
20191122_MKY1037_02	3.3	521.7142857	565.7288136	201.3938127	0.481155965
20191122_MKY1037_02	3.4	516.4761905	566.7683616	201.3319398	0.451521122
20191122_MKY1037_02	3.5	514.5714286	563.1186441	201.4180602	0.457518589
20191122_MKY1037_02	3.6	517.6666667	566.4576271	201.3398829	0.458555959
20191122_MKY1037_02	3.7	511.5238095	565.2485876	201.2533445	0.433940023
20191122_MKY1037_02	3.8	511.1904762	565.8418079	201.2859532	0.429860569
20191122_MKY1037_02	3.9	511.4761905	560.3502825	201.2817726	0.454180095
20191122_MKY1037_02	4	511.1904762	561.6158192	201.4126254	0.447345539
20191122_MKY1037_02	4.1	501.2380952	562.8474576	201.2809365	0.393758891
20191122_MKY1037_02	4.2	502.2857143	560.8079096	201.3662207	0.407121055
20191122_MKY1037_02	4.3	501.2857143	559.9887006	201.4548495	0.405505733
20191122_MKY1037_02	4.4	512	560.9435028	201.2412207	0.454262677
20191122_MKY1037_02	4.5	511.7142857	554.3276836	201.326505	0.481315312
20191122_MKY1037_02	4.6	512.047619	556.0508475	201.2821906	0.475470698
20191122_MKY1037_02	4.7	508.6666667	555.1355932	201.263796	0.462636161
20191122_MKY1037_02	4.8	521.6190476	554.6553672	201.2867893	0.529303432
20191122_MKY1037_02	4.9	525.7142857	549.8305085	201.3001672	0.572123819
20191122_MKY1037_02	5	524.1904762	549.8022599	201.2600334	0.564565384
20191122_MKY1037_02	5.1	525.952381	550.0225989	201.3156355	0.572418111
20191122_MKY1037_02	5.2	518.4761905	549.6327684	201.2370401	0.53646081
20191122_MKY1037_02	5.3	536.3333333	556.6327684	201.2483278	0.593404586
20191122_MKY1037_02	5.4	527.1904762	549.1073446	201.3373746	0.583003337
20191122_MKY1037_02	5.5	529.6190476	549.0564972	201.2575251	0.595577054
20191122_MKY1037_02	5.6	534.952381	556.4915254	201.3599498	0.587180389
20191122_MKY1037_02	5.7	527.047619	552.3559322	201.2964047	0.567017607
20191122_MKY1037_02	5.8	528.5714286	548.6610169	201.2487458	0.592159024
20191122_MKY1037_02	5.9	535.6666667	555.1129944	201.3561873	0.597191709
20191122_MKY1037_02	6	536.3809524	549.519774	201.3641304	0.62756356
20191122_MKY1037_02	6.1	529.0952381	541.4858757	201.2525084	0.629890552
20191122_MKY1037_02	6.2	534.952381	548.5932203	201.291388	0.624852428
20191122_MKY1037_02	6.3	536.2857143	549.0847458	201.2215719	0.629229208
20191122_MKY1037_02	6.4	533.952381	541.819209	201.3933946	0.653347753
20191122_MKY1037_02	6.5	537.047619	544.9661017	201.1969064	0.653479037
20191122_MKY1037_02	6.6	540.3809524	547.6836158	201.4117893	0.656906875
20191122_MKY1037_02	6.7	538.0952381	541.259887	201.3603679	0.677666765
20191122_MKY1037_02	6.8	535.8095238	542.2372881	201.2909699	0.660848957
20191122_MKY1037_02	6.9	543.6190476	545	201.1923077	0.686997113
20191122_MKY1037_02	7	538.3333333	544.1412429	201.2663043	0.66422208
20191122_MKY1037_02	7.1	531.6666667	540.8587571	201.298913	0.646365165
20191122_MKY1037_02	7.2	531.6666667	541.5819209	201.3001672	0.642720796
20191122_MKY1037_02	7.3	533.952381	539.299435	201.3599498	0.666189593
20191122_MKY1037_02	7.4	543.4285714	542.5310734	201.2964047	0.698711891
20191122_MKY1037_02	7.5	538.1428571	544.259887	201.1998328	0.662650084
20191122_MKY1037_02	7.6	541.9047619	547.6271186	201.3030936	0.664954788
20191122_MKY1037_02	7.7	542.7142857	543.5084746	201.3490803	0.689985443
20191122_MKY1037_02	7.8	541.8571429	541.6666667	201.1496656	0.695062209
20191122_MKY1037_02	7.9	537.7619048	538.6723164	201.2746656	0.689320592
20191122_MKY1037_02	8	544.0952381	539.4237288	201.3687291	0.71843154
20191122_MKY1037_02	8.1	544.047619	542.2316384	201.2533445	0.70346289
20191122_MKY1037_02	8.2	538.4285714	536.1412429	201.3035117	0.706116044
20191122_MKY1037_02	8.3	538.2857143	539.3559322	201.312291	0.688496492
20191122_MKY1037_02	8.4	549.3809524	541.0056497	201.2353679	0.737521065
20191122_MKY1037_02	8.5	542	536.8361582	201.2679766	0.72119786
20191122_MKY1037_02	8.6	538.8095238	541.0282486	201.3754181	0.682563283
20191122_MKY1037_02	8.7	553.0952381	544.4067797	201.3745819	0.738716915
20191122_MKY1037_02	8.8	560.0952381	541.7175141	201.2240803	0.789203598
20191122_MKY1037_02	8.9	548.8571429	536.7966102	201.2851171	0.757431364
20191122_MKY1037_02	9	554.6190476	539.5141243	201.2253344	0.772772385
20191122_MKY1037_02	9.1	545.5238095	535.2429379	201.3102007	0.748337978
20191122_MKY1037_02	9.2	547.047619	534.3107345	201.2541806	0.761477474
20191122_MKY1037_02	9.3	550.1904762	535.7062147	201.117893	0.770373358
20191122_MKY1037_02	9.4	552.2857143	536.1468927	201.2495819	0.779010452
20191122_MKY1037_02	9.5	550.1904762	537.5988701	201.2295151	0.760052446
20191122_MKY1037_02	9.6	561.8571429	535.5819209	201.3290134	0.832622091
20191122_MKY1037_02	9.7	559.6666667	535.3841808	201.3482441	0.822197824
20191122_MKY1037_02	9.8	555.4285714	532.1694915	201.361204	0.817995413
20191122_MKY1037_02	9.9	561.8095238	531.3389831	201.305602	0.856797604
20191122_MKY1037_02	10	566.0952381	535.0960452	201.2591973	0.857734677
20191122_MKY1037_02	10.1	574.8095238	529.4576271	201.2801003	0.937637842
20191122_MKY1037_02	10.2	567.2380952	525.7514124	201.3783445	0.919492968
20191122_MKY1037_02	10.3	566.4285714	524.9661017	201.2888796	0.919845728
20191122_MKY1037_02	10.4	560.6190476	523.4180791	201.3039298	0.897624166
20191122_MKY1037_02	10.5	558.0952381	521.9830508	201.2270067	0.892503432
20191122_MKY1037_02	10.6	557.6190476	527.7570621	201.319398	0.855304328
20191122_MKY1037_02	10.7	563.3333333	529.0338983	201.3097826	0.878535653
20191122_MKY1037_02	10.8	561	530.5932203	201.3030936	0.856823619
20191122_MKY1037_02	10.9	546.8571429	528.5932203	201.3440635	0.792440643
20191122_MKY1037_02	11	547.4285714	529.9548023	201.2629599	0.787772041
20191122_MKY1037_02	11.1	542.5714286	527.0112994	201.3373746	0.778284116
20191122_MKY1037_02	11.2	540.9047619	526.559322	201.305602	0.771810799
20191122_MKY1037_02	11.3	551.2857143	529.2711864	201.3620401	0.812401705
20191122_MKY1037_02	11.4	558.6190476	530.3276836	201.4318562	0.845682741
20191122_MKY1037_02	11.5	561.1904762	528.6723164	201.2173913	0.869099876
20191122_MKY1037_02	11.6	569.5238095	526.1412429	201.3219064	0.929470343
20191122_MKY1037_02	11.7	564.1904762	525.2711864	201.3390468	0.905830958
20191122_MKY1037_02	11.8	556.0952381	523.440678	201.3319398	0.872751159
20191122_MKY1037_02	11.9	563.2857143	522.1242938	201.256689	0.920169023
20191122_MKY1037_02	12	562.7619048	522.3785311	201.416388	0.915830008
20191122_MKY1037_02	12.1	559.7619048	517.6384181	201.3444816	0.928799245
20191122_MKY1037_02	12.2	557.3333333	517.480226	201.4071906	0.916303311
20191122_MKY1037_02	12.3	563.1428571	520	201.3775084	0.932722527
20191122_MKY1037_02	12.4	560.1904762	514.6949153	201.2265886	0.949874483
20191122_MKY1037_02	12.5	569.8095238	516.7909605	201.2621237	0.99022579
20191122_MKY1037_02	12.6	561.047619	513.7062147	201.3252508	0.961179241
20191122_MKY1037_02	12.7	547.9047619	510.0903955	201.3737458	0.909959517
20191122_MKY1037_02	12.8	552.4761905	510.2033898	201.3043478	0.935270333
20191122_MKY1037_02	12.9	564.952381	515.559322	201.2905518	0.971080778
20191122_MKY1037_02	13	566.5714286	510.8983051	201.3653846	1.011077444
20191122_MKY1037_02	13.1	562.4285714	511.1977401	201.4021739	0.985535854
20191122_MKY1037_02	13.2	558.4285714	510.6158192	201.381689	0.966583772
20191122_MKY1037_02	13.3	559.6666667	511.2937853	201.3382107	0.969134501
20191122_MKY1037_02	13.4	559.9047619	510.8700565	201.3871237	0.973323585
20191122_MKY1037_02	13.5	553.3333333	511.7514124	201.360786	0.930188295
20191122_MKY1037_02	13.6	554.3333333	508.9152542	201.3570234	0.954345935
20191122_MKY1037_02	13.7	550.6666667	508.0734463	201.3202341	0.93879855
20191122_MKY1037_02	13.8	565.0952381	511.3276836	201.2867893	0.99972559
20191122_MKY1037_02	13.9	560	509.779661	201.3285953	0.981032396
20191122_MKY1037_02	14	548.047619	509.9152542	201.3210702	0.911861372
20191122_MKY1037_02	14.1	550	510.3276836	201.236204	0.92029194
20191122_MKY1037_02	14.2	543.4285714	507.779661	201.3030936	0.899084435
20191122_MKY1037_02	14.3	536.4761905	504.8587571	201.3436455	0.877674496
20191122_MKY1037_02	14.4	539.2380952	507.6497175	201.4063545	0.875871643
20191122_MKY1037_02	14.5	550.8571429	505.5423729	201.4464883	0.956710532
20191122_MKY1037_02	14.6	538.5238095	505.0056497	201.3800167	0.888640909
20191122_MKY1037_02	14.7	534.1904762	501.6440678	201.3010033	0.885064957
20191122_MKY1037_02	14.8	539.047619	502.3785311	201.3440635	0.90876342
20191122_MKY1037_02	14.9	535.047619	498.9661017	201.382107	0.907772761
20191122_MKY1037_02	15	529.6666667	496.3333333	201.2792642	0.893189131
20191122_MKY1037_02	15.1	537.047619	497.4350282	201.2136288	0.929765086
20191122_MKY1037_02	15.2	539.952381	500.3954802	201.326087	0.927192464
20191122_MKY1037_02	15.3	532.2380952	496.7909605	201.3515886	0.905539535
20191122_MKY1037_02	15.4	527.9047619	493.5254237	201.2541806	0.90139264
20191122_MKY1037_02	15.5	531.952381	490.3163842	201.2554348	0.947940603
20191122_MKY1037_02	15.6	529.7142857	491.4124294	201.264214	0.926736459
20191122_MKY1037_02	15.7	542	493.6440678	201.3018395	0.985604316
20191122_MKY1037_02	15.8	531.8095238	491.6271186	201.3862876	0.938081745
20191122_MKY1037_02	15.9	530.2857143	494.9322034	201.2324415	0.90623022
20191122_MKY1037_02	16	538.3333333	495.3559322	201.2997492	0.951668038
20191122_MKY1037_02	16.1	544.5714286	497.819209	201.367893	0.972029029
20191122_MKY1037_02	16.2	536.1428571	497.2768362	201.3603679	0.925561403
20191122_MKY1037_02	16.3	533	495.0169492	201.2102843	0.921926967
20191122_MKY1037_02	16.4	528.952381	490.6892655	201.2207358	0.927046876
20191122_MKY1037_02	16.5	522.2857143	490.6666667	201.312291	0.886669453
20191122_MKY1037_02	16.6	532.3333333	495.9887006	201.2533445	0.911411541
20191122_MKY1037_02	16.7	520.2857143	493.7288136	201.3586957	0.854167158
20191122_MKY1037_02	16.8	526.2380952	495.7118644	201.3528428	0.876851787
20191122_MKY1037_02	16.9	532.6190476	499.8926554	201.3787625	0.88729791
20191122_MKY1037_02	17	529.5238095	495.0508475	201.2792642	0.900895534
20191122_MKY1037_02	17.1	537.7619048	493.9152542	201.3315217	0.958200589
20191122_MKY1037_02	17.2	534.3809524	494.3050847	201.2320234	0.935083009
20191122_MKY1037_02	17.3	535.952381	495.2485876	201.3072742	0.938136157
20191122_MKY1037_02	17.4	529.2380952	495.0564972	201.2102843	0.899095424
20191122_MKY1037_02	17.5	530.5238095	493.7570621	201.2658863	0.915622623
20191122_MKY1037_02	17.6	532.2380952	494.8587571	201.2713211	0.918472886
20191122_MKY1037_02	17.7	529.3333333	493.2655367	201.3030936	0.911804523
20191122_MKY1037_02	17.8	529.1904762	496.0169492	201.3068562	0.89246583
20191122_MKY1037_02	17.9	528.6666667	494.0960452	201.2035953	0.902103976
20191122_MKY1037_02	18	530.952381	496.1186441	201.3758361	0.902371354
20191122_MKY1037_02	18.1	528.1428571	493.079096	201.1843645	0.905792626
20191122_MKY1037_02	18.2	525.7142857	493.3220339	201.3628763	0.889618794
20191122_MKY1037_02	18.3	529.3333333	493	201.2278428	0.913550513
20191122_MKY1037_02	18.4	528.6190476	490.4237288	201.3386288	0.926942541
20191122_MKY1037_02	18.5	531.3809524	493.3107345	201.3913043	0.923926276
20191122_MKY1037_02	18.6	530.4285714	489.740113	201.2876254	0.942686558
20191122_MKY1037_03	-1.9	1310.238095	1088.723958	202.1458333	1.028626851
20191122_MKY1037_03	-1.8	1264.761905	1051.255208	202.1666667	1.032459389
20191122_MKY1037_03	-1.7	1276.380952	1047.651042	202	1.077997873
20191122_MKY1037_03	-1.6	1276.047619	1049.651042	202.1927083	1.070026319
20191122_MKY1037_03	-1.5	1260.047619	1045.109375	201.7552083	1.040615382
20191122_MKY1037_03	-1.4	1255.714286	1041.734375	202.2552083	1.040698799
20191122_MKY1037_03	-1.3	1272.857143	1044.942708	201.90625	1.077690392
20191122_MKY1037_03	-1.2	1262.095238	1041.161458	201.8229167	1.060633102
20191122_MKY1037_03	-1.1	1248.52381	1038.71875	201.8385417	1.030652227
20191122_MKY1037_03	-1	1233.380952	1031.572917	201.9375	1.012818851
20191122_MKY1037_03	-0.9	1243.047619	1031.34375	202.0625	1.041632209
20191122_MKY1037_03	-0.8	1218.761905	1022.932292	201.7864583	1.001410942
20191122_MKY1037_03	-0.7	1206.47619	1017.984375	201.9479167	0.98346068
20191122_MKY1037_03	-0.6	1210.190476	1021.458333	201.6927083	0.98164718
20191122_MKY1037_03	-0.5	1213.571429	1014.947917	201.8489583	1.015285775
20191122_MKY1037_03	-0.4	1195.666667	1006.34375	201.8854167	0.993891572
20191122_MKY1037_03	-0.3	1202.761905	1018.932292	201.78125	0.969049118
20191122_MKY1037_03	0	483	544.6875	201.7135417	0
20191122_MKY1037_03	0.1	488.8095238	544.3229167	201.7760417	0.042608456
20191122_MKY1037_03	0.2	494.047619	545.3020833	201.7552083	0.073412824
20191122_MKY1037_03	0.3	496.3809524	549.0625	201.7916667	0.067405555
20191122_MKY1037_03	0.4	512.7142857	554.8489583	201.5885417	0.145029924
20191122_MKY1037_03	0.5	508	549.9166667	201.8489583	0.142269755
20191122_MKY1037_03	0.6	513	547.625	201.8958333	0.190805706
20191122_MKY1037_03	0.7	524.5238095	552.7864583	201.6302083	0.23788146
20191122_MKY1037_03	0.8	534.5714286	551.234375	201.5364583	0.316480237
20191122_MKY1037_03	0.9	539.7142857	552.359375	201.9375	0.344162076
20191122_MKY1037_03	1	557.1904762	561.96875	201.734375	0.398789812
20191122_MKY1037_03	1.1	551.0952381	554.8333333	201.5885417	0.405210282
20191122_MKY1037_03	1.2	546	550.0364583	201.6197917	0.402809398
20191122_MKY1037_03	1.3	549.5238095	555.7239583	201.625	0.388627617
20191122_MKY1037_03	1.4	558.4285714	555.71875	201.6614583	0.448862211
20191122_MKY1037_03	1.5	550.2857143	552.46875	201.65625	0.41564552
20191122_MKY1037_03	1.6	559.7142857	555.2864583	201.9166667	0.460535741
20191122_MKY1037_03	1.7	556.7142857	555.7447917	201.5208333	0.437092927
20191122_MKY1037_03	1.8	562.2857143	555.890625	201.5208333	0.473739856
20191122_MKY1037_03	1.9	562	553.4166667	201.6666667	0.488953163
20191122_MKY1037_03	2	566.4761905	554.265625	201.5885417	0.513418987
20191122_MKY1037_03	2.1	565.3809524	550.796875	201.7447917	0.530556906
20191122_MKY1037_03	2.2	568.6666667	548.8020833	201.6302083	0.56750766
20191122_MKY1037_03	2.3	572.6666667	550.359375	201.6666667	0.583679294
20191122_MKY1037_03	2.4	570.8571429	550.78125	201.484375	0.56812252
20191122_MKY1037_03	2.5	561.8095238	546.078125	201.5885417	0.539853912
20191122_MKY1037_03	2.6	571.0952381	546.796875	201.8333333	0.599151087
20191122_MKY1037_03	2.7	566.952381	543.6041667	201.2447917	0.593790255
20191122_MKY1037_03	2.8	574.3809524	548.5989583	201.7708333	0.608484399
20191122_MKY1037_03	2.9	574.952381	545.9583333	201.5885417	0.63208199
20191122_MKY1037_03	3	575.047619	547.2916667	201.4635417	0.62266227
20191122_MKY1037_03	3.1	578.3809524	547.875	201.6979167	0.641484345
20191122_MKY1037_03	3.2	580.8571429	547.5	201.5208333	0.661331745
20191122_MKY1037_03	3.3	576.1428571	544.7239583	201.7395833	0.64981955
20191122_MKY1037_03	3.4	580.6666667	541.671875	201.640625	0.705056684
20191122_MKY1037_03	3.5	582.6666667	542.0052083	201.515625	0.716404356
20191122_MKY1037_03	3.6	582.952381	542.5	201.609375	0.7145999
20191122_MKY1037_03	3.7	587.4285714	545.6770833	201.7708333	0.721151465
20191122_MKY1037_03	3.8	592.4761905	549.0052083	201.4739583	0.729963846
20191122_MKY1037_03	3.9	593	547.9739583	201.6666667	0.741771003
20191122_MKY1037_03	4	592.5714286	550.3333333	201.3541667	0.720264808
20191122_MKY1037_03	4.1	603.8095238	552.1875	201.6770833	0.783085031
20191122_MKY1037_03	4.2	596.1904762	548.7239583	201.7239583	0.757985122
20191122_MKY1037_03	4.3	595.8095238	547.9114583	201.5208333	0.761543397
20191122_MKY1037_03	4.4	604.2857143	551.8645833	201.1197917	0.788303171
20191122_MKY1037_03	4.5	601.7142857	551.3802083	201.4270833	0.774836633
20191122_MKY1037_03	4.6	591.1904762	549.0625	201.421875	0.7206221
20191122_MKY1037_03	4.7	590.5238095	546.8385417	201.9375	0.733734463
20191122_MKY1037_03	4.8	602	552.9739583	201.8020833	0.764725571
20191122_MKY1037_03	4.9	607.7142857	555.640625	201.4791667	0.782503246
20191122_MKY1037_03	5	594.3809524	547.4010417	201.6875	0.755834286
20191122_MKY1037_03	5.1	594.7142857	546.1458333	201.5208333	0.767895706
20191122_MKY1037_03	5.2	586.3809524	546.3177083	201.5	0.708663378
20191122_MKY1037_03	5.3	594.952381	547.1822917	201.3697917	0.761210898
20191122_MKY1037_03	5.4	598.952381	548.6197917	201.6458333	0.777782534
20191122_MKY1037_03	5.5	591.0952381	544.1302083	201.2708333	0.758438324
20191122_MKY1037_03	5.6	602.4761905	550.0052083	201.4791667	0.790923105
20191122_MKY1037_03	5.7	595.952381	549.7083333	201.2239583	0.748193183
20191122_MKY1037_03	5.8	598.6190476	548.7291667	201.75	0.774723152
20191122_MKY1037_03	5.9	598.0952381	547.8020833	201.5885417	0.778272554
20191122_MKY1037_03	6	599.047619	552.5885417	201.5104167	0.747312519
20191122_MKY1037_03	6.1	616.3809524	556.9479167	201.671875	0.830984463
20191122_MKY1037_03	6.2	613.7142857	556.7708333	201.453125	0.814165358
20191122_MKY1037_03	6.3	609.5238095	554.6927083	201.4791667	0.80213515
20191122_MKY1037_03	6.4	606.7619048	550.2708333	201.7552083	0.818545522
20191122_MKY1037_03	6.5	598.047619	544.0416667	201.5520833	0.80800323
20191122_MKY1037_03	6.6	599.1428571	550.8541667	201.9270833	0.761817053
20191122_MKY1037_03	6.7	604.952381	547.2864583	201.6666667	0.829933457
20191122_MKY1037_03	6.8	606.1904762	547.2864583	202.0260417	0.838933105
20191122_MKY1037_03	6.9	603.5714286	549.0052083	201.28125	0.806178117
20191122_MKY1037_03	7	601.6666667	545.796875	201.3385417	0.818798259
20191122_MKY1037_03	7.1	590.3333333	544.2708333	201.3489583	0.752078495
20191122_MKY1037_03	7.2	592.6190476	543.53125	201.75	0.774339987
20191122_MKY1037_03	7.3	600.1904762	548.0052083	201.59375	0.791148642
20191122_MKY1037_03	7.4	604.2857143	547.1510417	201.7760417	0.826534508
20191122_MKY1037_03	7.5	603	543.90625	201.4270833	0.843575755
20191122_MKY1037_03	7.6	602.3809524	544.8072917	201.5052083	0.831986525
20191122_MKY1037_03	7.7	591	540.328125	201.5260417	0.788555127
20191122_MKY1037_03	7.8	603.047619	539.5833333	201.2447917	0.879552123
20191122_MKY1037_03	7.9	593.7142857	540.96875	201.4895833	0.802462963
20191122_MKY1037_03	8	599.3333333	543.9895833	201.5208333	0.817376982
20191122_MKY1037_03	8.1	613.7142857	546.0520833	201.390625	0.900470349
20191122_MKY1037_03	8.2	600.3809524	539.4375	201.3645833	0.862055965
20191122_MKY1037_03	8.3	603.1904762	538.5208333	201.3177083	0.889620648
20191122_MKY1037_03	8.4	592.5238095	536.9010417	201.546875	0.827575375
20191122_MKY1037_03	8.5	584.2380952	535.0677083	201.1822917	0.783062365
20191122_MKY1037_03	8.6	589.6190476	536.265625	201.9322917	0.812539661
20191122_MKY1037_03	8.7	587.0952381	535.1614583	201.46875	0.803089192
20191122_MKY1037_03	8.8	585.5238095	534.703125	201.3177083	0.795440413
20191122_MKY1037_03	8.9	583.4761905	533.5260417	201.4114583	0.79056222
20191122_MKY1037_03	9	576.8095238	529.5625	201.46875	0.775252503
20191122_MKY1037_03	9.1	587.2380952	529.78125	201.96875	0.850102342
20191122_MKY1037_03	9.2	586.6190476	532.1041667	201.359375	0.825090299
20191122_MKY1037_03	9.3	588.3809524	531.9114583	201.40625	0.839532985
20191122_MKY1037_03	9.4	590.5238095	530.640625	201.4322917	0.865965893
20191122_MKY1037_03	9.5	590.3333333	530.578125	201.4166667	0.865097224
20191122_MKY1037_03	9.6	587	526.9895833	201.4375	0.871791637
20191122_MKY1037_03	9.7	578.8095238	526.7604167	201.5885417	0.813700451
20191122_MKY1037_03	9.8	571.9047619	524.1614583	201.4479167	0.784680641
20191122_MKY1037_03	9.9	568.1904762	522.921875	201.7395833	0.767925222
20191122_MKY1037_03	10	557.9047619	519.9427083	201.484375	0.715890061
20191122_MKY1037_03	10.1	549.5238095	516.390625	201.5625	0.68246474
20191122_MKY1037_03	10.2	547.952381	515.171875	201.4635417	0.680672876
20191122_MKY1037_03	10.3	553.1904762	516.046875	201.6197917	0.713317577
20191122_MKY1037_03	10.4	556.047619	514.8229167	201.6666667	0.745660852
20191122_MKY1037_03	10.5	552.7142857	511.2135417	201.5885417	0.751388879
20191122_MKY1037_03	10.6	556.6666667	513.9791667	201.5520833	0.757603948
20191122_MKY1037_03	10.7	558.7142857	515.7552083	201.46875	0.757737446
20191122_MKY1037_03	10.8	556.047619	513.1354167	201.0677083	0.759704196
20191122_MKY1037_03	10.9	567	516.625	201.28125	0.812934116
20191122_MKY1037_03	11	569.6666667	518.5104167	201.4166667	0.816721419
20191122_MKY1037_03	11.1	568.8095238	518.484375	201.40625	0.810466132
20191122_MKY1037_03	11.2	561.5238095	517.1875	201.4583333	0.766684042
20191122_MKY1037_03	11.3	561.4285714	514.203125	201.34375	0.791872776
20191122_MKY1037_03	11.4	564.1904762	513.3333333	201.2135417	0.820581654
20191122_MKY1037_03	11.5	568.952381	516.875	201.5208333	0.825843702
20191122_MKY1037_03	11.6	578.9047619	518.5104167	201.4583333	0.886519995
20191122_MKY1037_03	11.7	576.3333333	517.6927083	201.3229167	0.874234189
20191122_MKY1037_03	11.8	578.2380952	515.0572917	201.6875	0.91316306
20191122_MKY1037_03	11.9	576.952381	518.0989583	201.2760417	0.875207401
20191122_MKY1037_03	12	583.9047619	518.5260417	201.375	0.923998119
20191122_MKY1037_03	12.1	578.2857143	515.03125	201.6041667	0.913637413
20191122_MKY1037_03	12.2	566.6666667	511.5729167	201.46875	0.855819989
20191122_MKY1037_03	12.3	568.8095238	512.6822917	201.3802083	0.862130418
20191122_MKY1037_03	12.4	567.7142857	512.2864583	201.4739583	0.857423717
20191122_MKY1037_03	12.5	573.3333333	512.84375	201.3125	0.89533246
20191122_MKY1037_03	12.6	574.047619	511.5572917	201.5677083	0.913093814
20191122_MKY1037_03	12.7	573.4761905	509.2604167	201.75	0.930415555
20191122_MKY1037_03	12.8	582.3809524	513.4375	201.625	0.959812649
20191122_MKY1037_03	12.9	575.7142857	509.2239583	201.515625	0.947788434
20191122_MKY1037_03	13	575.8571429	506.8802083	201.7760417	0.971712441
20191122_MKY1037_03	13.1	579.047619	509.1666667	201.484375	0.974211078
20191122_MKY1037_03	13.2	589.5238095	514.2447917	201.234375	1.006238384
20191122_MKY1037_03	13.3	585.1428571	511.8229167	201.484375	0.996083823
20191122_MKY1037_03	13.4	590	516.1510417	201.8229167	0.992934432
20191122_MKY1037_03	13.5	599.952381	517.8802083	201.453125	1.051411986
20191122_MKY1037_03	13.6	585.9047619	517.140625	201.453125	0.951956263
20191122_MKY1037_03	13.7	577.5238095	516.7083333	201.578125	0.892499797
20191122_MKY1037_03	13.8	579.7619048	516.140625	201.5625	0.914661009
20191122_MKY1037_03	13.9	574.3333333	512.9739583	201.359375	0.9018897
20191122_MKY1037_03	14	582.1428571	517.3854167	201.453125	0.921194391
20191122_MKY1037_03	14.1	576.2857143	516.6510417	201.3854167	0.88333576
20191122_MKY1037_03	14.2	585.0952381	516.4635417	201.5677083	0.952260355
20191122_MKY1037_03	14.3	580.9047619	517.171875	201.7760417	0.914252922
20191122_MKY1037_03	14.4	583.9047619	520.640625	201.4739583	0.905022427
20191122_MKY1037_03	14.5	595.8571429	523.3333333	201.5520833	0.970050373
20191122_MKY1037_03	14.6	591.2857143	521.2447917	201.3697917	0.954685083
20191122_MKY1037_03	14.7	583.1428571	518.7239583	201.5	0.916641947
20191122_MKY1037_03	14.8	592.5238095	521.9427083	201.578125	0.957920273
20191122_MKY1037_03	14.9	587.047619	516.9635417	201.3177083	0.96203507
20191122_MKY1037_03	15	586.7619048	514.8958333	201.5677083	0.979580562
20191122_MKY1037_03	15.1	591.4761905	520.7916667	201.75	0.960883041
20191122_MKY1037_03	15.2	594.5714286	518.6614583	201.640625	1.003719803
20191122_MKY1037_03	15.3	595.2380952	518.4322917	201.4114583	1.010484031
20191122_MKY1037_03	15.4	599.7142857	519.828125	201.4427083	1.031157797
20191122_MKY1037_03	15.5	605.3333333	521.3385417	201.5989583	1.059373577
20191122_MKY1037_03	15.6	596.4285714	521.9010417	201.5	0.987344451
20191122_MKY1037_03	15.7	603	520.5885417	201.3854167	1.048556759
20191122_MKY1037_03	15.8	605.4761905	523.71875	201.5260417	1.03796321
20191122_MKY1037_03	15.9	612.5238095	524.7447917	201.4895833	1.080557317
20191122_MKY1037_03	16	599.3809524	522.0625	201.5364583	1.007970455
20191122_MKY1037_03	16.1	598.8571429	522.8229167	201.4166667	0.996824515
20191122_MKY1037_03	16.2	594.5714286	521.0989583	201.3020833	0.980499021
20191122_MKY1037_03	16.3	601.6190476	519.5520833	201.296875	1.0478064
20191122_MKY1037_03	16.4	607.7142857	518.2604167	201.6666667	1.106897792
20191122_MKY1037_03	16.5	592.9047619	513.9322917	201.3020833	1.035218588
20191122_MKY1037_03	16.6	595.3809524	514.9322917	201.2447917	1.044445323
20191122_MKY1037_03	16.7	594.3809524	513.0625	201.2291667	1.054772456
20191122_MKY1037_03	16.8	591.1428571	511.0677083	201.1822917	1.049092266
20191122_MKY1037_03	16.9	584.8571429	511.9635417	201.59375	0.992738707
20191122_MKY1037_03	17	588.8571429	514.3072917	201.7395833	1.00146957
20191122_MKY1037_03	17.1	592.7142857	515.0208333	201.578125	1.023883344
20191122_MKY1037_03	17.2	596.4285714	516.6666667	201.546875	1.036438171
20191122_MKY1037_03	17.3	593.3809524	513.1979167	201.1666667	1.045666157
20191122_MKY1037_03	17.4	591.4285714	511.6927083	201.6041667	1.046067941
20191122_MKY1037_03	17.5	587.9047619	510.640625	201.4322917	1.028685151
20191122_MKY1037_03	17.6	590.7142857	511.6927083	201.7083333	1.04075895
20191122_MKY1037_03	17.7	598.1904762	512.7864583	201.3333333	1.086935117
20191122_MKY1037_03	17.8	598.7619048	512.84375	201.1145833	1.090301896
20191122_MKY1037_03	17.9	588.1428571	511.9166667	201.3541667	1.018076751
20191122_MKY1037_03	18	585.9047619	510.609375	201.75	1.014102564
20191122_MKY1037_04	-2.1	959.8571429	893.7123288	202.1676684	1.039005116
20191122_MKY1037_04	-2	897.2857143	849.0273973	202.0395855	0.986686247
20191122_MKY1037_04	-1.9	891.5238095	841.9863014	201.945285	0.993662959
20191122_MKY1037_04	-1.8	890.3333333	836.1986301	202.042487	1.013457766
20191122_MKY1037_04	-1.7	886	832.3972603	201.997513	1.012625029
20191122_MKY1037_04	-1.6	884.7142857	829.8082192	201.9689119	1.018643954
20191122_MKY1037_04	-1.5	884.3333333	825.2808219	201.868601	1.036711324
20191122_MKY1037_04	-1.4	885	831.6917808	201.9015544	1.011667641
20191122_MKY1037_04	-1.3	879.2857143	823.4315068	201.9658031	1.024662593
20191122_MKY1037_04	-1.2	873.3809524	822.8424658	201.8174093	1.003555326
20191122_MKY1037_04	-1.1	874.047619	822.8150685	201.8051813	1.006336956
20191122_MKY1037_04	-1	894.3333333	838.1849315	201.9297409	1.020621117
20191122_MKY1037_04	-0.9	877.6666667	825.4726027	201.8497409	1.009308705
20191122_MKY1037_04	-0.8	885.8095238	831.3972603	201.8084974	1.016091618
20191122_MKY1037_04	-0.7	871.7619048	818.2328767	201.784456	1.017108928
20191122_MKY1037_04	-0.6	860.2857143	817.8082192	201.864456	0.972708965
20191122_MKY1037_04	-0.5	864.1904762	819.0410959	201.8543005	0.983119323
20191122_MKY1037_04	-0.4	879.1428571	828.8767123	201.706943	1.000495618
20191122_MKY1037_04	-0.3	845.1428571	802.2465753	201.8267358	0.978871699
20191122_MKY1037_04	0	467.3333333	593.8013699	201.7239378	0
20191122_MKY1037_04	0.1	471.2380952	586.7191781	201.6864249	0.056231276
20191122_MKY1037_04	0.2	484.047619	605.9863014	201.757513	0.051927644
20191122_MKY1037_04	0.3	487.8571429	603.0273973	201.7660104	0.088292396
20191122_MKY1037_04	0.4	482.047619	591.9383562	201.7173057	0.101730727
20191122_MKY1037_04	0.5	489.6666667	604.0616438	201.6858031	0.095054279
20191122_MKY1037_04	0.6	499.3333333	617.1917808	201.6812435	0.096672905
20191122_MKY1037_04	0.7	488.2380952	601.4863014	201.7017617	0.097602609
20191122_MKY1037_04	0.8	489.952381	600.0958904	201.6766839	0.114550879
20191122_MKY1037_04	0.9	501.047619	614.9726027	201.7090155	0.116488305
20191122_MKY1037_04	1	494.4761905	604.3287671	201.7407254	0.123458389
20191122_MKY1037_04	1.1	493.5714286	600.4794521	201.7906736	0.135177205
20191122_MKY1037_04	1.2	518.6190476	623.3356164	201.6319171	0.184446382
20191122_MKY1037_04	1.3	509.8095238	610.4931507	201.826114	0.189283753
20191122_MKY1037_04	1.4	509.5714286	612.3082192	201.7019689	0.179751592
20191122_MKY1037_04	1.5	514.2857143	614.4863014	201.6099482	0.198430711
20191122_MKY1037_04	1.6	516.3333333	609.7328767	201.6725389	0.232722025
20191122_MKY1037_04	1.7	511.6666667	605.4726027	201.6876684	0.224200476
20191122_MKY1037_04	1.8	512.9047619	603.0821918	201.6516062	0.243272012
20191122_MKY1037_04	1.9	522.1904762	611.4863014	201.7448705	0.259937617
20191122_MKY1037_04	2	521.4285714	611.2328767	201.6781347	0.256606284
20191122_MKY1037_04	2.1	526.0952381	603.6438356	201.7931606	0.321932808
20191122_MKY1037_04	2.2	534.0952381	615.6849315	201.6727461	0.311766246
20191122_MKY1037_04	2.3	537.047619	618.9452055	201.6242487	0.313815181
20191122_MKY1037_04	2.4	534.5714286	611.0547945	201.6026943	0.33729708
20191122_MKY1037_04	2.5	535.0952381	617.2876712	201.6949223	0.310025101
20191122_MKY1037_04	2.6	544.7619048	619.2260274	201.6625907	0.358326115
20191122_MKY1037_04	2.7	544.4761905	619.3082192	201.6594819	0.356228074
20191122_MKY1037_04	2.8	537.6190476	619.5	201.7316062	0.314436287
20191122_MKY1037_04	2.9	548.5714286	618.4315068	201.7459067	0.384843707
20191122_MKY1037_04	3	550.2857143	617.890411	201.6159585	0.397892983
20191122_MKY1037_04	3.1	541.9047619	613.3219178	201.6683938	0.370354667
20191122_MKY1037_04	3.2	541.5238095	615.1369863	201.5842487	0.359141442
20191122_MKY1037_04	3.3	547.8095238	612.9041096	201.7007254	0.408082856
20191122_MKY1037_04	3.4	551.2857143	614.4863014	201.6317098	0.421053312
20191122_MKY1037_04	3.5	544.1428571	608.1849315	201.6737824	0.409975726
20191122_MKY1037_04	3.6	558.9047619	616.6780822	201.7633161	0.455439142
20191122_MKY1037_04	3.7	560.7142857	618.6164384	201.5678756	0.456441618
20191122_MKY1037_04	3.8	543.9047619	601.4109589	201.6041451	0.444026812
20191122_MKY1037_04	3.9	542.2380952	601.5958904	201.6853886	0.432616479
20191122_MKY1037_04	4	540.047619	605.5410959	201.6458031	0.398512978
20191122_MKY1037_04	4.1	526.7142857	591.130137	201.6265285	0.390501312
20191122_MKY1037_04	4.2	534.4285714	594.6575342	201.5989637	0.420681719
20191122_MKY1037_04	4.3	543.0952381	602.4863014	201.6304663	0.433279927
20191122_MKY1037_04	4.4	548.6666667	597.2123288	201.6360622	0.496482028
20191122_MKY1037_04	4.5	538.2857143	588.9041096	201.6346114	0.476645116
20191122_MKY1037_04	4.6	545.0952381	595.7191781	201.6002073	0.482253703
20191122_MKY1037_04	4.7	537.8571429	586.8013699	201.7007254	0.485616958
20191122_MKY1037_04	4.8	532.1428571	579.7260274	201.6429016	0.488699915
20191122_MKY1037_04	4.9	539.5238095	588.0342466	201.571399	0.489518618
20191122_MKY1037_04	5	532.047619	583.6917808	201.7363731	0.465455103
20191122_MKY1037_04	5.1	530.4761905	575.2123288	201.5740933	0.503911005
20191122_MKY1037_04	5.2	544.7619048	584.630137	201.7210363	0.54269753
20191122_MKY1037_04	5.3	541.3333333	582.8972603	201.7270466	0.530465085
20191122_MKY1037_04	5.4	538.047619	573.9589041	201.6397927	0.561744009
20191122_MKY1037_04	5.5	539.4761905	577.2260274	201.6690155	0.551647401
20191122_MKY1037_04	5.6	539.6190476	575.5821918	201.7573057	0.562364592
20191122_MKY1037_04	5.7	528.9047619	572.1027397	201.7025907	0.511627628
20191122_MKY1037_04	5.8	535.7619048	571.6643836	201.6909845	0.560283834
20191122_MKY1037_04	5.9	533.3333333	565.8767123	201.6965803	0.579364344
20191122_MKY1037_04	6	537.6190476	569.2876712	201.5573057	0.58741768
20191122_MKY1037_04	6.1	541.8095238	570.9657534	201.6889119	0.605216642
20191122_MKY1037_04	6.2	545.6190476	570.3561644	201.5517098	0.634734483
20191122_MKY1037_04	6.3	535.5238095	563.4178082	201.6984456	0.609787766
20191122_MKY1037_04	6.4	532.7619048	562.6438356	201.5811399	0.595760602
20191122_MKY1037_04	6.5	529.8571429	559.4452055	201.6719171	0.595910827
20191122_MKY1037_04	6.6	531.7619048	561.5342466	201.6344041	0.595852759
20191122_MKY1037_04	6.7	530.047619	562.5479452	201.8395855	0.577524056
20191122_MKY1037_04	6.8	531.2857143	564.760274	201.6273575	0.572353288
20191122_MKY1037_04	6.9	542.5238095	570.0479452	201.5836269	0.615788736
20191122_MKY1037_04	7	539.0952381	566.5479452	201.5703627	0.614502
20191122_MKY1037_04	7.1	541.6190476	569.3424658	201.5925389	0.614081912
20191122_MKY1037_04	7.2	539.3333333	564.6232877	201.5512953	0.628320482
20191122_MKY1037_04	7.3	532.1904762	562.2534247	201.6437306	0.594255182
20191122_MKY1037_04	7.4	549.2857143	572.4794521	201.6567876	0.645981721
20191122_MKY1037_04	7.5	544.2380952	571.8013699	201.5450777	0.616424314
20191122_MKY1037_04	7.6	537.1904762	563.2054795	201.5508808	0.62266144
20191122_MKY1037_04	7.7	548.7142857	573.609589	201.5732642	0.635125724
20191122_MKY1037_04	7.8	544.047619	567.3150685	201.6860104	0.643273564
20191122_MKY1037_04	7.9	545.0952381	564.4863014	201.5311917	0.668642688
20191122_MKY1037_04	8	557.4761905	573.5	201.4737824	0.694365954
20191122_MKY1037_04	8.1	556.1904762	569.5205479	201.6617617	0.711346519
20191122_MKY1037_04	8.2	539.1904762	558.6438356	201.6012435	0.666011209
20191122_MKY1037_04	8.3	550.7142857	567.7328767	201.5707772	0.685902556
20191122_MKY1037_04	8.4	560	576.4520548	201.5533679	0.692347899
20191122_MKY1037_04	8.5	546.047619	561.0342466	201.5805181	0.69779182
20191122_MKY1037_04	8.6	550.8095238	559.0136986	201.5753368	0.744350244
20191122_MKY1037_04	8.7	556.6190476	567.9041096	201.601658	0.724834194
20191122_MKY1037_04	8.8	542.4285714	555.2945205	201.6099482	0.710998758
20191122_MKY1037_04	8.9	546.8571429	559.8561644	201.6290155	0.711221886
20191122_MKY1037_04	9	556.047619	570.7054795	201.5647668	0.70272274
20191122_MKY1037_04	9.1	549.3809524	556.7808219	201.5890155	0.749615375
20191122_MKY1037_04	9.2	549.7142857	563.9863014	201.6395855	0.703518563
20191122_MKY1037_04	9.3	547	567.8493151	201.5917098	0.659947778
20191122_MKY1037_04	9.4	534.1428571	559.8561644	201.6683938	0.623024307
20191122_MKY1037_04	9.5	550.2857143	565.9931507	201.6091192	0.694278757
20191122_MKY1037_04	9.6	543.047619	562.4863014	201.6847668	0.667522531
20191122_MKY1037_04	9.7	547.9047619	562.8150685	201.7110881	0.698790291
20191122_MKY1037_04	9.8	543.1904762	560.0753425	201.6352332	0.684341781
20191122_MKY1037_04	9.9	541.8095238	558.5821918	201.6049741	0.68464304
20191122_MKY1037_04	10	545.8571429	566.4178082	201.4756477	0.661403051
20191122_MKY1037_04	10.1	539.7619048	558.6369863	201.5361658	0.670056488
20191122_MKY1037_04	10.2	544.4761905	557.8082192	201.6439378	0.708376834
20191122_MKY1037_04	10.3	548.2857143	567.1369863	201.6451813	0.673233143
20191122_MKY1037_04	10.4	537.8095238	559.1506849	201.546943	0.653108238
20191122_MKY1037_04	10.5	546.9047619	563.7808219	201.6520207	0.685594309
20191122_MKY1037_04	10.6	544.4285714	564.1575342	201.5780311	0.666189867
20191122_MKY1037_04	10.7	541.2857143	559.260274	201.5334715	0.676540446
20191122_MKY1037_04	10.8	548.6666667	567.6369863	201.6924352	0.672583455
20191122_MKY1037_04	10.9	550.0952381	569.130137	201.5981347	0.672703191
20191122_MKY1037_04	11	549.047619	564.3630137	201.5720207	0.696493233
20191122_MKY1037_04	11.1	553.8095238	568.6849315	201.6511917	0.700683861
20191122_MKY1037_04	11.2	551.9047619	570.2945205	201.6329534	0.677445069
20191122_MKY1037_04	11.3	554.3333333	573.5410959	201.4845596	0.673113641
20191122_MKY1037_04	11.4	554.047619	569.7465753	201.6196891	0.695424863
20191122_MKY1037_04	11.5	555.4761905	569.8493151	201.5823834	0.704409576
20191122_MKY1037_04	11.6	561.6190476	569.5479452	201.6074611	0.747836633
20191122_MKY1037_04	11.7	558.952381	564.6643836	201.5904663	0.762288712
20191122_MKY1037_04	11.8	558.0952381	566.6917808	201.5258031	0.74288749
20191122_MKY1037_04	11.9	556.9047619	564.8082192	201.6520207	0.747305357
20191122_MKY1037_04	12	558	566.4726027	201.586943	0.74368644
20191122_MKY1037_04	12.1	558.9047619	571.3767123	201.5629016	0.717587359
20191122_MKY1037_04	12.2	561	569.0136986	201.6895337	0.747173245
20191122_MKY1037_04	12.3	560.9047619	567.6506849	201.6789637	0.755579344
20191122_MKY1037_04	12.4	557.2380952	569	201.6302591	0.721831792
20191122_MKY1037_04	12.5	554.1428571	568.5890411	201.5027979	0.703603236
20191122_MKY1037_04	12.6	558.952381	566.4041096	201.6217617	0.750622986
20191122_MKY1037_04	12.7	557.3333333	562.1986301	201.653057	0.767849058
20191122_MKY1037_04	12.8	545.952381	558.0616438	201.6002073	0.71697667
20191122_MKY1037_04	12.9	551.5238095	557.8356164	201.5523316	0.757361202
20191122_MKY1037_04	13	548.6190476	552.7191781	201.5579275	0.772366604
20191122_MKY1037_04	13.1	539.6666667	550.0753425	201.5587565	0.727175494
20191122_MKY1037_04	13.2	544.8095238	555	201.6099482	0.729732749
20191122_MKY1037_04	13.3	554.047619	555.8767123	201.506114	0.788551152
20191122_MKY1037_04	13.4	548.5238095	551.0273973	201.5703627	0.783575597
20191122_MKY1037_04	13.5	548.4285714	551.6232877	201.5255959	0.778703652
20191122_MKY1037_04	13.6	552	554.3082192	201.5419689	0.785118489
20191122_MKY1037_04	13.7	548.1428571	551.4383562	201.5548187	0.777974144
20191122_MKY1037_04	13.8	550.3809524	550.7191781	201.6692228	0.798967215
20191122_MKY1037_04	13.9	546.6666667	548.5958904	201.5912953	0.787562045
20191122_MKY1037_04	14	541.9047619	546.3287671	201.626114	0.769488776
20191122_MKY1037_04	14.1	541.5238095	545.5958904	201.5827979	0.771966426
20191122_MKY1037_04	14.2	543.8571429	544.9109589	201.4696373	0.793751372
20191122_MKY1037_04	14.3	538.4285714	542.7191781	201.6356477	0.770122112
20191122_MKY1037_04	14.4	535.6190476	542.8082192	201.5749223	0.749032145
20191122_MKY1037_04	14.5	530.2380952	536.8013699	201.5987565	0.752729419
20191122_MKY1037_04	14.6	538.8095238	537.4931507	201.559171	0.811109953
20191122_MKY1037_04	14.7	542.5238095	538.2328767	201.6926425	0.833051405
20191122_MKY1037_04	14.8	538.5238095	535.739726	201.5794819	0.822073827
20191122_MKY1037_04	14.9	537.3809524	531.3013699	201.5123316	0.847174464
20191122_MKY1037_04	15	539.6666667	533.0753425	201.5597927	0.850771013
20191122_MKY1037_04	15.1	537.6190476	531.2876712	201.5141969	0.849073576
20191122_MKY1037_04	15.2	533.6666667	522.7534247	201.5562694	0.885787484
20191122_MKY1037_04	15.3	537.8571429	531.0753425	201.6205181	0.852516372
20191122_MKY1037_04	15.4	545.5714286	533.0684932	201.4594819	0.895047142
20191122_MKY1037_04	15.5	524.7142857	521.6712329	201.5496373	0.824991406
20191122_MKY1037_04	15.6	536.5238095	527.0068493	201.6878756	0.874054698
20191122_MKY1037_04	15.7	541.047619	529.4109589	201.6321244	0.889575717
20191122_MKY1037_04	15.8	530	521.4520548	201.611399	0.867772555
20191122_MKY1037_04	15.9	530.952381	525.2534247	201.6043523	0.845121532
20191122_MKY1037_04	16	533.1428571	524.3150685	201.5622798	0.869327589
20191122_MKY1037_04	16.1	529.3809524	525.3219178	201.573057	0.832523388
20191122_MKY1037_04	16.2	533.0952381	523.1369863	201.6250777	0.878325319
20191122_MKY1037_04	16.3	529	519.1917808	201.5467358	0.878088616
20191122_MKY1037_04	16.4	524.6666667	517.8424658	201.4663212	0.854963485
20191122_MKY1037_04	16.5	523.8095238	517.8424658	201.5649741	0.848247154
20191122_MKY1037_04	16.6	529.8095238	520.4041096	201.6087047	0.874672666
20191122_MKY1037_04	16.7	523.8095238	517.5479452	201.5570984	0.850605296
20191122_MKY1037_04	16.8	521.2857143	515.6232877	201.5977202	0.846173177
20191122_MKY1037_04	16.9	525.3809524	517.8150685	201.6594819	0.860829199
20191122_MKY1037_04	17	526.8095238	517.4863014	201.4710881	0.874671347
20191122_MKY1037_04	17.1	525.3809524	510.6780822	201.6312953	0.919571077
20191122_MKY1037_04	17.2	525.5238095	513.8287671	201.544456	0.894416437
20191122_MKY1037_04	17.3	522.1904762	513.2054795	201.6053886	0.873013184
20191122_MKY1037_04	17.4	526.1904762	517.0616438	201.6667358	0.873284254
20191122_MKY1037_04	17.5	518.7142857	512.2945205	201.6511917	0.852717897
20191122_MKY1037_04	17.6	528.5238095	517.4452055	201.651399	0.888532765
20191122_MKY1037_04	17.7	523	514.6369863	201.6167876	0.867751519
20191122_MKY1037_04	17.8	525.9047619	514.4315068	201.5307772	0.892472154
20191122_MKY1037_05	-2.2	861.7619048	850.8350515	202.2625424	1.102418958
20191122_MKY1037_05	-2.1	839.8095238	831.0515464	202.2182195	1.09267127
20191122_MKY1037_05	-2	803.8571429	810.8350515	202.1422105	1.007915241
20191122_MKY1037_05	-1.9	837.5714286	835.7319588	202.1276877	1.055872399
20191122_MKY1037_05	-1.8	837.1904762	826.8969072	202.0379102	1.101170151
20191122_MKY1037_05	-1.7	801.2380952	792.9175258	202.0022633	1.093183568
20191122_MKY1037_05	-1.6	813.3333333	796.6494845	202.1474915	1.139858292
20191122_MKY1037_05	-1.5	793.2857143	801.5876289	202.1092041	0.99995472
20191122_MKY1037_05	-1.4	770.2857143	792.4536082	202.0290456	0.920853238
20191122_MKY1037_05	-1.3	769.2380952	791.8556701	201.9688797	0.918194351
20191122_MKY1037_05	-1.2	797.1428571	812.5979381	201.9875519	0.961693296
20191122_MKY1037_05	-1.1	780.9047619	800.0515464	201.9766126	0.939318038
20191122_MKY1037_05	-1	784.8095238	798.3608247	202.0594115	0.970323022
20191122_MKY1037_05	-0.9	799.7619048	802.8041237	201.906639	1.029281805
20191122_MKY1037_05	-0.8	776.4285714	768.5154639	201.9643531	1.092804165
20191122_MKY1037_05	-0.7	763.9047619	765.2164948	201.9415315	1.038408056
20191122_MKY1037_05	-0.6	761.1428571	778.8556701	201.9845341	0.943687671
20191122_MKY1037_05	-0.5	751.4761905	764.9484536	201.9213504	0.966308456
20191122_MKY1037_05	-0.4	752.8571429	756.5360825	201.8377971	1.02404267
20191122_MKY1037_05	-0.3	758.952381	777.7010309	201.9375707	0.937485167
20191122_MKY1037_05	0	355.9047619	426.2268041	201.8523199	0
20191122_MKY1037_05	0.1	366	427.7216495	201.9181441	0.133759239
20191122_MKY1037_05	0.2	369	428.4329897	201.8751415	0.170517502
20191122_MKY1037_05	0.3	374.1428571	426.1546392	201.821954	0.272257692
20191122_MKY1037_05	0.4	381.7619048	431.7628866	201.8274236	0.320306896
20191122_MKY1037_05	0.5	379	428.4948454	201.8521313	0.317215561
20191122_MKY1037_05	0.6	388.4761905	429.3092784	201.7802716	0.447129561
20191122_MKY1037_05	0.7	392.1428571	435.1237113	201.7947944	0.431294228
20191122_MKY1037_05	0.8	390.7619048	427.9896907	201.832516	0.496709124
20191122_MKY1037_05	0.9	398.8571429	433.5463918	201.8530743	0.546411235
20191122_MKY1037_05	1	401.047619	435.8247423	201.7968691	0.550143334
20191122_MKY1037_05	1.1	390.1428571	431.8041237	201.7350057	0.441727623
20191122_MKY1037_05	1.2	393.6190476	432.4536082	201.832516	0.484088215
20191122_MKY1037_05	1.3	400.1428571	436.2886598	201.9160694	0.531379675
20191122_MKY1037_05	1.4	401.6666667	439.4845361	201.8555262	0.514946568
20191122_MKY1037_05	1.5	404.4285714	441.2783505	201.7612222	0.532626056
20191122_MKY1037_05	1.6	407.4761905	444.4536082	201.91192	0.537273581
20191122_MKY1037_05	1.7	409.2857143	443.2886598	201.8511882	0.576069985
20191122_MKY1037_05	1.8	406.3333333	443.628866	201.8377971	0.53130202
20191122_MKY1037_05	1.9	410.1904762	442.4020619	201.8213882	0.599250591
20191122_MKY1037_05	2	413.3809524	444.0103093	201.7989438	0.624064947
20191122_MKY1037_05	2.1	415.4761905	443.5670103	201.798378	0.65834071
20191122_MKY1037_05	2.2	415.3333333	438.3195876	201.8851377	0.721657761
20191122_MKY1037_05	2.3	416.6190476	441.3814433	201.747831	0.701249136
20191122_MKY1037_05	2.4	414.6190476	440.6907216	201.8689174	0.681776805
20191122_MKY1037_05	2.5	421.3333333	446.6597938	201.7476424	0.70099549
20191122_MKY1037_05	2.6	417.8571429	445.0206186	201.7374576	0.673478996
20191122_MKY1037_05	2.7	417.3333333	442.9175258	201.7465108	0.692073594
20191122_MKY1037_05	2.8	421.8095238	438.3814433	201.7763108	0.812385182
20191122_MKY1037_05	2.9	418.8095238	439.2783505	201.7712184	0.758504387
20191122_MKY1037_05	3	415.6666667	437.7525773	201.8257261	0.733698095
20191122_MKY1037_05	3.1	428.6190476	442.1752577	201.8413806	0.85789798
20191122_MKY1037_05	3.2	426.3333333	446.7216495	201.8251603	0.768281966
20191122_MKY1037_05	3.3	421.0952381	446.4845361	201.7174651	0.699933939
20191122_MKY1037_05	3.4	424.7619048	450.6082474	201.733874	0.699518143
20191122_MKY1037_05	3.5	420.6666667	445.8041237	201.8606186	0.702211076
20191122_MKY1037_05	3.6	421.7619048	448.0618557	201.7495285	0.689764992
20191122_MKY1037_05	3.7	426.6190476	453.2680412	201.6840815	0.692602156
20191122_MKY1037_05	3.8	422.7142857	452.5154639	201.7480196	0.649491454
20191122_MKY1037_05	3.9	418.7619048	454.5979381	201.8181818	0.572957605
20191122_MKY1037_05	4	419.0952381	453.5154639	201.8164843	0.589701994
20191122_MKY1037_05	4.1	425.8571429	455.8350515	201.7991324	0.652273114
20191122_MKY1037_05	4.2	432.3809524	455.9381443	201.7798944	0.736790035
20191122_MKY1037_05	4.3	437.2380952	457.4639175	201.6665409	0.782245204
20191122_MKY1037_05	4.4	438.8095238	459.1030928	201.7563184	0.782955539
20191122_MKY1037_05	4.5	446.1428571	463.7113402	201.7838551	0.822287629
20191122_MKY1037_05	4.6	442.6666667	457.814433	201.7312335	0.848731781
20191122_MKY1037_05	4.7	449.4761905	459.4226804	201.7019992	0.917353704
20191122_MKY1037_05	4.8	448.6666667	460.814433	201.7740475	0.889644157
20191122_MKY1037_05	4.9	447.3333333	454.6907216	201.728593	0.949095377
20191122_MKY1037_05	5	449.3809524	450.7525773	201.7742361	1.02779231
20191122_MKY1037_05	5.1	452.952381	450.5463918	201.6959638	1.07845488
20191122_MKY1037_05	5.2	452.7142857	448.8041237	201.7593361	1.099014853
20191122_MKY1037_05	5.3	446.3333333	445.9793814	201.7691437	1.051019549
20191122_MKY1037_05	5.4	447.1428571	447.7938144	201.6712561	1.037352945
20191122_MKY1037_05	5.5	445.6666667	443.4536082	201.7450019	1.076744075
20191122_MKY1037_05	5.6	442.4285714	442.7319588	201.8249717	1.041977758
20191122_MKY1037_05	5.7	445.1904762	443.8762887	201.7055828	1.064295944
20191122_MKY1037_05	5.8	441	440.3505155	201.7431158	1.055267535
20191122_MKY1037_05	5.9	434.4285714	432.4226804	201.7563184	1.075209175
20191122_MKY1037_05	6	440	437.1030928	201.6659751	1.087253778
20191122_MKY1037_05	6.1	446.5238095	445.1030928	201.725198	1.065667183
20191122_MKY1037_05	6.2	441.5238095	441.2680412	201.743493	1.049745904
20191122_MKY1037_05	6.3	447.6666667	441.4639175	201.7642399	1.132560038
20191122_MKY1037_05	6.4	446.8095238	440.7216495	201.747831	1.131217817
20191122_MKY1037_05	6.5	447.8571429	441.443299	201.7293474	1.135494393
20191122_MKY1037_05	6.6	444.8571429	443.8453608	201.7680121	1.06013304
20191122_MKY1037_05	6.7	443.5714286	437.6907216	201.813278	1.129402362
20191122_MKY1037_05	6.8	442.3333333	438.6701031	201.7715956	1.097798292
20191122_MKY1037_05	6.9	452.3809524	439.2783505	201.774802	1.230333525
20191122_MKY1037_05	7	454.7619048	440.5773196	201.751226	1.244436395
20191122_MKY1037_05	7.1	446.1428571	435.4742268	201.7404753	1.198543372
20191122_MKY1037_05	7.2	447.2857143	439.3195876	201.7025651	1.15808888
20191122_MKY1037_05	7.3	443.6190476	445.2989691	201.7191626	1.023159845
20191122_MKY1037_05	7.4	443.8571429	444.5876289	201.6655979	1.036143814
20191122_MKY1037_05	7.5	445.1428571	448.9381443	201.7680121	0.994926339
20191122_MKY1037_05	7.6	448.7142857	447.3814433	201.7214259	1.064292132
20191122_MKY1037_05	7.7	443.8095238	449.7525773	201.7466994	0.966191325
20191122_MKY1037_05	7.8	437.0952381	447.7113402	201.6820068	0.902146778
20191122_MKY1037_05	7.9	432.1428571	449.628866	201.672765	0.81078234
20191122_MKY1037_05	8	436.3333333	450.2680412	201.6657865	0.859078041
20191122_MKY1037_05	8.1	436	444.742268	201.7118069	0.926106553
20191122_MKY1037_05	8.2	442.952381	452.1546392	201.7023765	0.92353407
20191122_MKY1037_05	8.3	436.8571429	451.4329897	201.7868729	0.851287714
20191122_MKY1037_05	8.4	434.5238095	445.2474227	201.640513	0.899241329
20191122_MKY1037_05	8.5	443.3809524	450.185567	201.7725387	0.954745304
20191122_MKY1037_05	8.6	435.5714286	441.3917526	201.6982271	0.965126495
20191122_MKY1037_05	8.7	436.9047619	443.1030928	201.7798944	0.960445214
20191122_MKY1037_05	8.8	431.7142857	438.8350515	201.6987929	0.945946884
20191122_MKY1037_05	8.9	425.3333333	433.556701	201.7121841	0.927784179
20191122_MKY1037_05	9	430.5714286	436.1340206	201.7402867	0.966964172
20191122_MKY1037_05	9.1	429.5238095	429.2474227	201.6895511	1.050235797
20191122_MKY1037_05	9.2	426.3809524	427.9381443	201.6761599	1.023208411
20191122_MKY1037_05	9.3	421.4285714	427.7628866	201.69106	0.952653379
20191122_MKY1037_05	9.4	422.7619048	427.2783505	201.7036967	0.979347806
20191122_MKY1037_05	9.5	428.7142857	432.742268	201.6735194	0.987993249
20191122_MKY1037_05	9.6	424	429	201.6761599	0.972761565
20191122_MKY1037_05	9.7	432.4761905	432.7525773	201.7272727	1.042188073
20191122_MKY1037_05	9.8	436.0952381	435.0618557	201.7395323	1.060965573
20191122_MKY1037_05	9.9	432.5238095	428.3092784	201.6744625	1.108255788
20191122_MKY1037_05	10	425.2857143	428.8865979	201.6614485	0.993283209
20191122_MKY1037_05	10.1	434.047619	436.6597938	201.7023765	1.009070557
20191122_MKY1037_05	10.2	424.2380952	435.4948454	201.6007167	0.885530767
20191122_MKY1037_05	10.3	420.8095238	430.5051546	201.7116183	0.904725517
20191122_MKY1037_05	10.4	424.2380952	429.4639175	201.711241	0.96959008
20191122_MKY1037_05	10.5	426.4761905	430.7113402	201.7063372	0.984449157
20191122_MKY1037_05	10.6	427.5238095	427.5773196	201.6884195	1.045390777
20191122_MKY1037_05	10.7	430.8095238	425.628866	201.7384006	1.123420813
20191122_MKY1037_05	10.8	427.5238095	429.1546392	201.8012071	1.022237542
20191122_MKY1037_05	10.9	425.4761905	426.0824742	201.7138816	1.037161586
20191122_MKY1037_05	11	421.9047619	425.5463918	201.7593361	0.991862747
20191122_MKY1037_05	11.1	423.0952381	424.0103093	201.6331573	1.032445717
20191122_MKY1037_05	11.2	415.8095238	424.4020619	201.7187854	0.917379425
20191122_MKY1037_05	11.3	412.1904762	424.3195876	201.6365522	0.864366017
20191122_MKY1037_05	11.4	426.5238095	428.4226804	201.5858167	1.018238651
20191122_MKY1037_05	11.5	423	422.9896907	201.6863448	1.04633701
20191122_MKY1037_05	11.6	415.3809524	421.1237113	201.7551867	0.958796829
20191122_MKY1037_05	11.7	417.6190476	425.556701	201.6705017	0.92783544
20191122_MKY1037_05	11.8	417.952381	423.4639175	201.7695209	0.963195094
20191122_MKY1037_05	11.9	411.2380952	414.4845361	201.6259902	0.995271236
20191122_MKY1037_05	12	417.952381	414.742268	201.6476801	1.096466333
20191122_MKY1037_05	12.1	412.6190476	413.8659794	201.7600905	1.026557896
20191122_MKY1037_05	12.2	409.4761905	409.7938144	201.7761222	1.041084658
20191122_MKY1037_05	12.3	414.3333333	413.9896907	201.6505092	1.051583651
20191122_MKY1037_05	12.4	406.2380952	413.814433	201.7634855	0.926917847
20191122_MKY1037_05	12.5	411.047619	412.2886598	201.7795172	1.026502461
20191122_MKY1037_05	12.6	417.5238095	418.9175258	201.631837	1.024770741
20191122_MKY1037_05	12.7	418.8095238	418.1546392	201.6884195	1.056280169
20191122_MKY1037_05	12.8	421.2857143	417.2164948	201.832516	1.10924627
20191122_MKY1037_05	12.9	413.8571429	421.6907216	201.7840438	0.927273577
20191122_MKY1037_05	13	412.1428571	421.185567	201.7674462	0.908614234
20191122_MKY1037_05	13.1	408.2857143	426.9484536	201.767069	0.769530705
20191122_MKY1037_05	13.2	409.7619048	427.4020619	201.7293474	0.785258471
20191122_MKY1037_05	13.3	405.3333333	424.5257732	201.7282158	0.75863454
20191122_MKY1037_05	13.4	411.952381	426.3917526	201.6473029	0.831720498
20191122_MKY1037_05	13.5	414.6666667	430.0927835	201.6923802	0.820732266
20191122_MKY1037_05	13.6	414.8571429	424.2164948	201.6859676	0.905788587
20191122_MKY1037_05	13.7	411.4761905	428.2680412	201.7240664	0.79876135
20191122_MKY1037_05	13.8	410.3333333	427.3298969	201.6744625	0.794758883
20191122_MKY1037_05	13.9	411.1428571	420.9793814	201.7101094	0.896436304
20191122_MKY1037_05	14	417.5714286	424.2680412	201.7178423	0.945739308
20191122_MKY1037_05	14.1	419.5238095	428.7113402	201.643908	0.911119569
20191122_MKY1037_05	14.2	412.8571429	421.7938144	201.6563561	0.910671654
20191122_MKY1037_05	14.3	412.7619048	425.1546392	201.7069031	0.861050054
20191122_MKY1037_05	14.4	416.8571429	430.371134	201.7384006	0.848878253
20191122_MKY1037_05	14.5	410.8571429	423.3298969	201.7221803	0.858307583
20191122_MKY1037_05	14.6	415.8571429	424.5154639	201.6120332	0.916521525
20191122_MKY1037_05	14.7	423.5238095	428.7010309	201.6589966	0.970064889
20191122_MKY1037_05	14.8	432.9047619	432	201.6076952	1.059290082
20191122_MKY1037_05	14.9	431.6190476	431.2268041	201.6192003	1.051883921
20191122_MKY1037_05	15	435	432.0103093	201.561109	1.089486714
20191122_MKY1037_05	15.1	430.4761905	433.1237113	201.7135043	1.007991839
20191122_MKY1037_05	15.2	416.5714286	429.742268	201.7029423	0.853387853
20191122_MKY1037_05	15.3	417.6190476	432.9793814	201.6403244	0.824545294
20191122_MKY1037_05	15.4	430.3333333	437.9175258	201.5878914	0.939059135
20191122_MKY1037_05	15.5	413.7619048	435.4329897	201.597699	0.736824735
20191122_MKY1037_05	15.6	417	435.3195876	201.7261411	0.784396924
20191122_MKY1037_05	15.7	416.0952381	442.5154639	201.7472652	0.679890352
20191122_MKY1037_05	15.8	418.2857143	441.9484536	201.6393814	0.717493482
20191122_MKY1037_05	15.9	404.3333333	437.0618557	201.733874	0.581942255
20191122_MKY1037_05	16	405.8571429	440.9690722	201.788759	0.556156443
20191122_MKY1037_05	16.1	408.8095238	439.1030928	201.60298	0.620410924
20191122_MKY1037_05	16.2	405.2380952	443.0515464	201.6750283	0.523255395
20191122_MKY1037_05	16.3	403.952381	434.9072165	201.7465108	0.603019858
20191122_MKY1037_05	16.4	408.6190476	442.1443299	201.7114296	0.580737355
20191122_MKY1037_05	16.5	414.2857143	437.8041237	201.6831384	0.713703908
20191122_MKY1037_05	16.6	422.0952381	438.8453608	201.6195775	0.81048935
20191122_MKY1037_05	16.7	423.1904762	440.2164948	201.6789891	0.807924622
20191122_MKY1037_05	16.8	427.5238095	441.185567	201.7082233	0.855753349
20191122_MKY1037_05	16.9	429.5238095	436.6494845	201.6382497	0.944970812
20191122_MKY1037_05	17	428.2857143	430.9690722	201.705017	1.007112567
20191122_MKY1037_05	17.1	431.6190476	434.8659794	201.61788	0.999714569
20191122_MKY1037_05	17.2	422.5238095	435.6185567	201.5958129	0.859402494
20191122_MKY1037_05	17.3	413.1904762	435.371134	201.6646548	0.729376017
20191122_MKY1037_05	17.4	413.1428571	432.9587629	201.6161826	0.760259633
20191122_MKY1037_05	17.5	418.2380952	438.7216495	201.5722369	0.757863152
20191122_MKY1037_05	17.6	423.6666667	434.3402062	201.6054319	0.893095249
20191122_MKY1037_05	17.7	419.3333333	429.8041237	201.5912863	0.89302748
20191122_MKY1037_06	-1.6	957.6666667	1109.186441	203.0711701	0.921857652
20191122_MKY1037_06	-1.5	950.4761905	1090.40678	203.0702654	0.954463597
20191122_MKY1037_06	-1.4	946.8571429	1084.39548	202.9698432	0.960136201
20191122_MKY1037_06	-1.3	946.8095238	1081.40113	202.9028951	0.96984189
20191122_MKY1037_06	-1.2	937.4761905	1072.440678	202.9523522	0.962936935
20191122_MKY1037_06	-1.1	948.3333333	1070.056497	202.8721351	1.013812345
20191122_MKY1037_06	-1	953.1428571	1062.084746	202.8992762	1.060278289
20191122_MKY1037_06	-0.9	942	1057.146893	202.8890229	1.0329005
20191122_MKY1037_06	-0.8	930	1047.943503	202.85193	1.016562009
20191122_MKY1037_06	-0.7	919.9047619	1052.774011	202.8477081	0.959144694
20191122_MKY1037_06	-0.6	920.1904762	1050.960452	202.7789505	0.966518839
20191122_MKY1037_06	-0.5	921.1428571	1052.389831	202.7693004	0.965490539
20191122_MKY1037_06	-0.4	934.4761905	1059.440678	202.7873945	0.994946666
20191122_MKY1037_06	-0.3	935.047619	1057.649718	202.7798552	1.003367586
20191122_MKY1037_06	0	543.1904762	806.9830508	202.5437274	0
20191122_MKY1037_06	0.1	550.7619048	801.7740113	202.5708685	0.059978872
20191122_MKY1037_06	0.2	559.2380952	808.5649718	202.5910736	0.085530224
20191122_MKY1037_06	0.3	564.5238095	806.519774	202.7533173	0.121957369
20191122_MKY1037_06	0.4	576.0952381	799.9322034	202.6013269	0.21127123
20191122_MKY1037_06	0.5	586.2857143	806.1299435	202.5386007	0.247232656
20191122_MKY1037_06	0.6	578.1904762	801.3559322	202.7120024	0.217926943
20191122_MKY1037_06	0.7	571.2857143	788.3333333	202.5799156	0.225599606
20191122_MKY1037_06	0.8	588	792.1751412	202.6381182	0.308513603
20191122_MKY1037_06	0.9	599.5714286	798.3389831	202.477684	0.352177877
20191122_MKY1037_06	1	594.4761905	803.8022599	202.5883595	0.302209222
20191122_MKY1037_06	1.1	596.4285714	801.2881356	202.5913752	0.322743495
20191122_MKY1037_06	1.2	602.3809524	804.1581921	202.592883	0.34587672
20191122_MKY1037_06	1.3	595.6666667	803.1525424	202.6984318	0.311195098
20191122_MKY1037_06	1.4	589.5714286	800.4350282	202.5102533	0.286845142
20191122_MKY1037_06	1.5	599.7619048	805.0564972	202.5841375	0.327613923
20191122_MKY1037_06	1.6	604.8095238	810.039548	202.435766	0.337832364
20191122_MKY1037_06	1.7	609.952381	809.3276836	202.5295537	0.369336744
20191122_MKY1037_06	1.8	616.1428571	812.2316384	202.4399879	0.39331599
20191122_MKY1037_06	1.9	613.8095238	806.1638418	202.5189988	0.403287942
20191122_MKY1037_06	2	623.047619	802.7344633	202.4683353	0.469410492
20191122_MKY1037_06	2.1	631.6190476	799.3559322	202.4770808	0.532151427
20191122_MKY1037_06	2.2	643.5714286	803.5254237	202.5404101	0.583072566
20191122_MKY1037_06	2.3	650.0952381	800.1412429	202.4303378	0.634844173
20191122_MKY1037_06	2.4	650.9047619	799.6892655	202.5009047	0.641325602
20191122_MKY1037_06	2.5	653.4285714	804.1242938	202.4499397	0.63680909
20191122_MKY1037_06	2.6	651.7142857	796.2768362	202.4420989	0.660853471
20191122_MKY1037_06	2.7	652.7619048	792.8135593	202.455971	0.682108869
20191122_MKY1037_06	2.8	644.6190476	796.299435	202.4879373	0.619774138
20191122_MKY1037_06	2.9	650	792.8983051	202.5711701	0.665554178
20191122_MKY1037_06	3	646.6190476	794.5536723	202.5120627	0.63882466
20191122_MKY1037_06	3.1	641.0952381	800.5141243	202.4831122	0.581634712
20191122_MKY1037_06	3.2	642.8571429	803.0903955	202.4496381	0.580958103
20191122_MKY1037_06	3.3	647.2380952	801.2316384	202.4800965	0.613761618
20191122_MKY1037_06	3.4	648.8095238	802.2090395	202.4632087	0.618613415
20191122_MKY1037_06	3.5	640.7619048	799.480226	202.3968637	0.584203751
20191122_MKY1037_06	3.6	655.4285714	797.3107345	202.5253317	0.677617662
20191122_MKY1037_06	3.7	647.6666667	793.440678	202.5193004	0.649723203
20191122_MKY1037_06	3.8	648.0952381	796.299435	202.4900483	0.639817383
20191122_MKY1037_06	3.9	656	795.4745763	202.5657419	0.688937353
20191122_MKY1037_06	4	649.6190476	790.2033898	202.4556695	0.675398029
20191122_MKY1037_06	4.1	653.5238095	790.4858757	202.4170688	0.696937952
20191122_MKY1037_06	4.2	652.047619	789.9661017	202.5340772	0.690498112
20191122_MKY1037_06	4.3	668.6190476	785.6497175	202.3835947	0.807388178
20191122_MKY1037_06	4.4	655.2380952	778.7570621	202.4212907	0.7605752
20191122_MKY1037_06	4.5	657.7619048	780.2711864	202.3226779	0.768605517
20191122_MKY1037_06	4.6	646.6666667	773.1468927	202.4375754	0.735571822
20191122_MKY1037_06	4.7	649.1428571	771.2429379	202.4007841	0.759448709
20191122_MKY1037_06	4.8	649.8095238	769.0847458	202.4372738	0.773673024
20191122_MKY1037_06	4.9	647.047619	778.3672316	202.3787696	0.713756419
20191122_MKY1037_06	5	650.9047619	774.3163842	202.4306393	0.755507249
20191122_MKY1037_06	5.1	642.5714286	766.2542373	202.4788902	0.743229372
20191122_MKY1037_06	5.2	630.7619048	764.3163842	202.4297346	0.680542369
20191122_MKY1037_06	5.3	639.6190476	755.1016949	202.3739445	0.779016989
20191122_MKY1037_06	5.4	640.2380952	757.1864407	202.5108565	0.772480775
20191122_MKY1037_06	5.5	645.9047619	758.5423729	202.3983715	0.800929663
20191122_MKY1037_06	5.6	655.952381	764.3389831	202.5259349	0.833838672
20191122_MKY1037_06	5.7	659.8095238	751.519774	202.4613993	0.922498752
20191122_MKY1037_06	5.8	664.1904762	757.6779661	202.3338359	0.918013971
20191122_MKY1037_06	5.9	662.8095238	756.9435028	202.3211701	0.913272191
20191122_MKY1037_06	6	656.5714286	757.8926554	202.405006	0.869871101
20191122_MKY1037_06	6.1	673.3809524	756.9548023	202.5241255	0.978294296
20191122_MKY1037_06	6.2	673.047619	751.3841808	202.4360676	1.005809362
20191122_MKY1037_06	6.3	673.3333333	748.0508475	202.3190591	1.025638147
20191122_MKY1037_06	6.4	691.8571429	747.7288136	202.3932449	1.14363726
20191122_MKY1037_06	6.5	684.0952381	745.8926554	202.4668275	1.105063688
20191122_MKY1037_06	6.6	689.0952381	747.5310734	202.4402895	1.127371176
20191122_MKY1037_06	6.7	701.2380952	748.180791	202.4007841	1.199945505
20191122_MKY1037_06	6.8	703.2380952	748.4745763	202.371532	1.2108186
20191122_MKY1037_06	6.9	705.0952381	744.3333333	202.3323281	1.246569525
20191122_MKY1037_06	7	699.7142857	745.1242938	202.3935464	1.207961211
20191122_MKY1037_06	7.1	689.1904762	747.4237288	202.3395657	1.128639393
20191122_MKY1037_06	7.2	693.952381	739.779661	202.393848	1.20245253
20191122_MKY1037_06	7.3	687.3809524	745.1977401	202.3196622	1.12977972
20191122_MKY1037_06	7.4	687	742.0508475	202.300965	1.145214137
20191122_MKY1037_06	7.5	690.3333333	737.2542373	202.3639928	1.19408872
20191122_MKY1037_06	7.6	682.0952381	738.0508475	202.2934258	1.136828554
20191122_MKY1037_06	7.7	694.9047619	730.6045198	202.4131484	1.263027646
20191122_MKY1037_06	7.8	683.8095238	726.3220339	202.4065139	1.216610002
20191122_MKY1037_06	7.9	686.5238095	725.0508475	202.3066948	1.242095113
20191122_MKY1037_06	8	693.8095238	725.3220339	202.3863088	1.288121016
20191122_MKY1037_06	8.1	689.5714286	726.4858757	202.3670084	1.253293022
20191122_MKY1037_06	8.2	676.952381	731.5141243	202.3799759	1.141372394
20191122_MKY1037_06	8.3	686.4761905	733.5649718	202.3507238	1.190927863
20191122_MKY1037_06	8.4	682.952381	732.3672316	202.3284077	1.175226963
20191122_MKY1037_06	8.5	690.5238095	736.6497175	202.4209891	1.198812611
20191122_MKY1037_06	8.6	680.1904762	741.1129944	202.3748492	1.107236409
20191122_MKY1037_06	8.7	675.5238095	737.5141243	202.3124246	1.097845622
20191122_MKY1037_06	8.8	684.9047619	736.1581921	202.4016888	1.165655019
20191122_MKY1037_06	8.9	683.1428571	737.1242938	202.267491	1.148865732
20191122_MKY1037_06	9	674.0952381	732.2429379	202.3100121	1.11873266
20191122_MKY1037_06	9.1	675.952381	730.1129944	202.3926417	1.143029325
20191122_MKY1037_06	9.2	668.4285714	734.4011299	202.3172497	1.069892812
20191122_MKY1037_06	9.3	665.2380952	728.259887	202.3664053	1.084108886
20191122_MKY1037_06	9.4	671	729.0112994	202.3130277	1.117311896
20191122_MKY1037_06	9.5	677.952381	732.259887	202.2322075	1.143610216
20191122_MKY1037_06	9.6	673.0952381	728.0508475	202.2536188	1.136566333
20191122_MKY1037_06	9.7	672.4285714	728.9548023	202.3661037	1.126890674
20191122_MKY1037_06	9.8	669.4761905	731.3446328	202.4056092	1.093938501
20191122_MKY1037_06	9.9	664.7142857	725.819209	202.2795537	1.094801693
20191122_MKY1037_06	10	668.952381	729.2937853	202.3573583	1.102339909
20191122_MKY1037_06	10.1	675.6666667	730.6949153	202.3691194	1.137808473
20191122_MKY1037_06	10.2	671.047619	725.4576271	202.2273824	1.138381187
20191122_MKY1037_06	10.3	666.7142857	720.7570621	202.431544	1.13743774
20191122_MKY1037_06	10.4	668.047619	725.1638418	202.3790712	1.120351448
20191122_MKY1037_06	10.5	681.7619048	727.1242938	202.4372738	1.198418916
20191122_MKY1037_06	10.6	673.7619048	716.3841808	202.2647768	1.2105844
20191122_MKY1037_06	10.7	672.3333333	723.3672316	202.2484922	1.159123306
20191122_MKY1037_06	10.8	653.5238095	721.2768362	202.3736429	1.047358269
20191122_MKY1037_06	10.9	655.8095238	714.9096045	202.2819662	1.099686425
20191122_MKY1037_06	11	658	715.4745763	202.227684	1.111008034
20191122_MKY1037_06	11.1	660.1428571	717.6610169	202.3495175	1.112254782
20191122_MKY1037_06	11.2	654.6666667	718.0621469	202.3329312	1.073539936
20191122_MKY1037_06	11.3	665	716.5875706	202.3338359	1.1509597
20191122_MKY1037_06	11.4	673.7142857	715.6101695	202.3471049	1.214957048
20191122_MKY1037_06	11.5	675.6190476	715.0169492	202.3534379	1.231315525
20191122_MKY1037_06	11.6	668.4285714	712.8079096	202.2783474	1.19680277
20191122_MKY1037_06	11.7	665.4761905	715.5480226	202.2219542	1.160450277
20191122_MKY1037_06	11.8	664.6666667	715.7514124	202.2747286	1.153793173
20191122_MKY1037_06	11.9	672.1428571	719.4124294	202.2813631	1.181464098
20191122_MKY1037_06	12	675.3809524	719.4858757	202.3356454	1.2024307
20191122_MKY1037_06	12.1	675.4285714	723.5706215	202.36731	1.178177442
20191122_MKY1037_06	12.2	665.5714286	717.5988701	202.3425814	1.148704742
20191122_MKY1037_06	12.3	663.6666667	714.9661017	202.2340169	1.151864595
20191122_MKY1037_06	12.4	661.4761905	713.7627119	202.2340169	1.144450681
20191122_MKY1037_06	12.5	665.7142857	712.5254237	202.2702051	1.180322756
20191122_MKY1037_06	12.6	654.0952381	715.8700565	202.3703257	1.082519987
20191122_MKY1037_06	12.7	647.0952381	715.8700565	202.2747286	1.035924723
20191122_MKY1037_06	12.8	654.3809524	717.8474576	202.2246683	1.072981362
20191122_MKY1037_06	12.9	656.6190476	712.7288136	202.2246683	1.118102673
20191122_MKY1037_06	13	660.2857143	709.2655367	202.3624849	1.163594825
20191122_MKY1037_06	13.1	660.2857143	707.6610169	202.3446924	1.17342912
20191122_MKY1037_06	13.2	658.952381	713.2768362	202.227684	1.130466777
20191122_MKY1037_06	13.3	644.6190476	707.6553672	202.240953	1.067382669
20191122_MKY1037_06	13.4	639.7142857	706.8983051	202.3329312	1.038514618
20191122_MKY1037_06	13.5	642.4761905	707.9096045	202.1676719	1.051428635
20191122_MKY1037_06	13.6	637.952381	709.3559322	202.199035	1.012353983
20191122_MKY1037_06	13.7	646.1904762	710.7231638	202.3091074	1.059823925
20191122_MKY1037_06	13.8	651.952381	718.7627119	202.2683957	1.051523031
20191122_MKY1037_06	13.9	640.3809524	716.2316384	202.2964415	0.989081381
20191122_MKY1037_06	14	638.1904762	705.3785311	202.145959	1.037279554
20191122_MKY1037_06	14.1	647.3333333	708.920904	202.2165259	1.07826074
20191122_MKY1037_06	14.2	642.0952381	705.3276836	202.2578408	1.064057178
20191122_MKY1037_06	14.3	644.3333333	693.8022599	202.272316	1.149838739
20191122_MKY1037_06	14.4	636.4761905	695.5875706	202.2436671	1.084176559
20191122_MKY1037_06	14.5	634.2857143	697.1920904	202.3302171	1.059174439
20191122_MKY1037_06	14.6	625.1428571	691.5141243	202.2916164	1.029903829
20191122_MKY1037_06	14.7	637.3809524	693.2259887	202.225573	1.104998524
20191122_MKY1037_06	14.8	639.1428571	696.3502825	202.2138118	1.098029024
20191122_MKY1037_06	14.9	654.8095238	696.8983051	202.2768396	1.203086925
20191122_MKY1037_06	15	645.5238095	694.4011299	202.2952352	1.15435883
20191122_MKY1037_06	15.1	653.7142857	695.1129944	202.1972256	1.20687263
20191122_MKY1037_06	15.2	632.7142857	694.1016949	202.1314837	1.067188624
20191122_MKY1037_06	15.3	634.3809524	691.6723164	202.1721954	1.09368684
20191122_MKY1037_06	15.4	630.8095238	691.9435028	202.2484922	1.066975577
20191122_MKY1037_06	15.5	623.3333333	692.559322	202.2861882	1.010960324
20191122_MKY1037_06	15.6	626.1428571	688.8418079	202.2204463	1.053262648
20191122_MKY1037_06	15.7	617.2857143	683.9152542	202.2424608	1.020786021
20191122_MKY1037_06	15.8	616.1904762	686.5762712	202.3235826	0.996747568
20191122_MKY1037_06	15.9	620	679.9491525	202.2291918	1.064752385
20191122_MKY1037_06	16	626.1904762	675.0847458	202.1884801	1.140420145
20191122_MKY1037_06	16.1	627.047619	671.8587571	202.25	1.167715497
20191122_MKY1037_06	16.2	629.6190476	675.7344633	202.238842	1.160965193
20191122_MKY1037_06	16.3	618.7142857	672.1468927	202.2813631	1.105061241
20191122_MKY1037_06	16.4	618.1904762	669.3728814	202.1577201	1.119344598
20191122_MKY1037_06	16.5	619.4285714	671.7288136	202.2460796	1.113003075
20191122_MKY1037_06	16.6	622.7142857	672.6214689	202.2355247	1.131156754
20191122_MKY1037_06	16.7	621.3333333	674.1129944	202.2638721	1.111436919
20191122_MKY1037_06	16.8	628.1428571	674.440678	202.2605549	1.158713187
20191122_MKY1037_06	16.9	621.4761905	671.259887	202.2840772	1.130965986
20191122_MKY1037_06	17	623.4285714	674.6497175	202.2967431	1.123144064
20191122_MKY1037_06	17.1	615.047619	671.0903955	202.1779252	1.085208316
20191122_MKY1037_06	17.2	625.6190476	677.2033898	202.2361279	1.122569401
20191122_MKY1037_06	17.3	638.6190476	679.0564972	202.1043426	1.204148069
20191122_MKY1037_06	17.4	634.4285714	679.9152542	202.2644753	1.168373936
20191122_MKY1037_06	17.5	634.7142857	677.2259887	202.2077805	1.188012983
20191122_MKY1037_06	17.6	616.3333333	671.8474576	202.272316	1.089641052
20191122_MKY1037_06	17.7	631.8571429	672.2033898	202.1565139	1.200547405
20191122_MKY1037_06	17.8	636.9047619	672.1920904	202.1999397	1.237372387
20191122_MKY1037_06	17.9	623.1428571	666.0847458	202.2291918	1.177462194
20191122_MKY1037_06	18	623.7142857	667.4915254	202.1604343	1.172320103
20191122_MKY1037_06	18.1	627.6666667	667.5819209	202.2086852	1.200766926
20191122_MKY1037_06	18.2	628.4285714	669.819209	202.2689988	1.191328705
20191122_MKY1037_06	18.3	632.0952381	667.5310734	202.3042823	1.233645756
20191122_MKY1037_07	-2.2	1127.190476	1079.887006	203.009752	0.97592252
20191122_MKY1037_07	-2.1	1093.095238	1055.282486	202.8049596	0.959350516
20191122_MKY1037_07	-2	1077.428571	1054.79096	202.7782112	0.928611154
20191122_MKY1037_07	-1.9	1091.904762	1048.112994	202.8102536	0.972225245
20191122_MKY1037_07	-1.8	1060.428571	1044.627119	202.6224575	0.915125692
20191122_MKY1037_07	-1.7	1079.714286	1040.446328	202.8133185	0.963711441
20191122_MKY1037_07	-1.6	1062.666667	1037.254237	202.7860128	0.935323335
20191122_MKY1037_07	-1.5	1065.238095	1032.559322	202.7013096	0.95074822
20191122_MKY1037_07	-1.4	1076.047619	1028.661017	202.6007244	0.981831657
20191122_MKY1037_07	-1.3	1095.428571	1025.491525	202.6071329	1.029574625
20191122_MKY1037_07	-1.2	1108.761905	1029.259887	202.6146559	1.048903305
20191122_MKY1037_07	-1.1	1098.190476	1025.689266	202.5190861	1.034907009
20191122_MKY1037_07	-1	1110.952381	1022.327684	202.6152132	1.069542587
20191122_MKY1037_07	-0.9	1108.190476	1017.881356	202.5714684	1.074122037
20191122_MKY1037_07	-0.8	1094.095238	1016.824859	202.6299805	1.046708029
20191122_MKY1037_07	-0.7	1060.952381	1016.361582	202.4859292	0.977379145
20191122_MKY1037_07	-0.6	1058.809524	1018.531073	202.5887434	0.968005486
20191122_MKY1037_07	-0.5	1051.238095	1017.180791	202.5335748	0.954943379
20191122_MKY1037_07	-0.4	1049.857143	1017.59887	202.5901365	0.951096502
20191122_MKY1037_07	-0.3	1048.142857	1013.028249	202.5536361	0.957569895
20191122_MKY1037_07	0	444.4285714	697.0112994	202.4814712	0
20191122_MKY1037_07	0.1	446.952381	699.6045198	202.447757	0.00442279
20191122_MKY1037_07	0.2	448.952381	697.0847458	202.4374478	0.015758478
20191122_MKY1037_07	0.3	460.2857143	696.9152542	202.4360546	0.05566645
20191122_MKY1037_07	0.4	472.6666667	693.7457627	202.4017832	0.105085292
20191122_MKY1037_07	0.5	484.2857143	698.3954802	202.3719699	0.136703478
20191122_MKY1037_07	0.6	482.9047619	698.6949153	202.3850655	0.13128253
20191122_MKY1037_07	0.7	497.0952381	700.5819209	202.2839231	0.176951985
20191122_MKY1037_07	0.8	502	696.2937853	202.512399	0.202671414
20191122_MKY1037_07	0.9	509.047619	698.3163842	202.3577598	0.223166875
20191122_MKY1037_07	1	510.7619048	698.3220339	202.309557	0.22919175
20191122_MKY1037_07	1.1	509.7619048	700.1468927	202.3201449	0.221766789
20191122_MKY1037_07	1.2	510.6190476	702.7570621	202.3374199	0.219137196
20191122_MKY1037_07	1.3	527.0952381	700.9717514	202.3552522	0.280032441
20191122_MKY1037_07	1.4	529.0952381	701.2937853	202.4179437	0.286158588
20191122_MKY1037_07	1.5	536.952381	698.6045198	202.3137364	0.319776821
20191122_MKY1037_07	1.6	543	699.6214689	202.3480078	0.338372748
20191122_MKY1037_07	1.7	547.5714286	702.6214689	202.3546949	0.3470583
20191122_MKY1037_07	1.8	545.8571429	700.4124294	202.3460574	0.346408649
20191122_MKY1037_07	1.9	550.8095238	694.1016949	202.2680412	0.379189268
20191122_MKY1037_07	2	550.3333333	699.2429379	202.4137643	0.364711681
20191122_MKY1037_07	2.1	556.1428571	696.5310734	202.3259961	0.391760342
20191122_MKY1037_07	2.2	561.4761905	699.6271186	202.3382558	0.402579917
20191122_MKY1037_07	2.3	560.5238095	696.8983051	202.2783505	0.406196198
20191122_MKY1037_07	2.4	564.6666667	691.7457627	202.4363332	0.43385565
20191122_MKY1037_07	2.5	577.2380952	691.4745763	202.3307328	0.479078586
20191122_MKY1037_07	2.6	588.2380952	688.4576271	202.3471719	0.526392993
20191122_MKY1037_07	2.7	587.0952381	691.2033898	202.2828086	0.51469552
20191122_MKY1037_07	2.8	600.8571429	693.0903955	202.3580385	0.557874141
20191122_MKY1037_07	2.9	607.952381	690.9152542	202.3608247	0.589219281
20191122_MKY1037_07	3	606.7142857	690.6384181	202.3076066	0.585682966
20191122_MKY1037_07	3.1	603.8095238	686.5367232	202.3510727	0.587412481
20191122_MKY1037_07	3.2	605.5238095	687.3050847	202.3346336	0.591261169
20191122_MKY1037_07	3.3	619.0952381	688.440678	202.3566453	0.636143061
20191122_MKY1037_07	3.4	603.5714286	683.7966102	202.3385344	0.594720766
20191122_MKY1037_07	3.5	609.8571429	684.960452	202.3485651	0.613750508
20191122_MKY1037_07	3.6	611.7619048	681.6271186	202.4524937	0.630713312
20191122_MKY1037_07	3.7	607.4285714	679.8305085	202.3513514	0.620636988
20191122_MKY1037_07	3.8	607.8571429	673.440678	202.3324046	0.642105848
20191122_MKY1037_07	3.9	610.6190476	677.8757062	202.3739203	0.638247819
20191122_MKY1037_07	4	623.952381	678.6384181	202.3496796	0.684264328
20191122_MKY1037_07	4.1	622.1428571	672.7514124	202.3468933	0.696762464
20191122_MKY1037_07	4.2	635.7619048	671.2259887	202.1919755	0.752021001
20191122_MKY1037_07	4.3	636.4285714	670.0508475	202.2396211	0.758483569
20191122_MKY1037_07	4.4	627.1904762	669.7288136	202.4343828	0.725371488
20191122_MKY1037_07	4.5	636	673.4237288	202.344107	0.745399211
20191122_MKY1037_07	4.6	639.4285714	672.4971751	202.3393703	0.761138708
20191122_MKY1037_07	4.7	636.2857143	675.1129944	202.3555308	0.740755635
20191122_MKY1037_07	4.8	642.7142857	675.1412429	202.2332126	0.764190479
20191122_MKY1037_07	4.9	643.3333333	676.6271186	202.2947896	0.761388045
20191122_MKY1037_07	5	630.4285714	672.3785311	202.2677626	0.72847696
20191122_MKY1037_07	5.1	641.5714286	673.9152542	202.3800502	0.764150155
20191122_MKY1037_07	5.2	639.5714286	673.6949153	202.2346057	0.757607673
20191122_MKY1037_07	5.3	629.8095238	669.2146893	202.3694622	0.736818827
20191122_MKY1037_07	5.4	632.2380952	666.9491525	202.2850376	0.753592825
20191122_MKY1037_07	5.5	635.952381	668.8248588	202.2819727	0.760923377
20191122_MKY1037_07	5.6	641.0952381	670.1694915	202.3053775	0.775297308
20191122_MKY1037_07	5.7	651.7142857	670.4632768	202.2808582	0.813484328
20191122_MKY1037_07	5.8	648.3333333	666.819209	202.3084425	0.813916202
20191122_MKY1037_07	5.9	647.1904762	671.4180791	202.2284759	0.793452915
20191122_MKY1037_07	6	650.0952381	666.1581921	202.1278908	0.822868835
20191122_MKY1037_07	6.1	648.9047619	667.8135593	202.2964614	0.812494797
20191122_MKY1037_07	6.2	643.7142857	666.480226	202.2789078	0.797935703
20191122_MKY1037_07	6.3	647.2857143	665.3954802	202.3265534	0.815105732
20191122_MKY1037_07	6.4	646.8571429	666.2711864	202.250209	0.8103867
20191122_MKY1037_07	6.5	641.6666667	666.2711864	202.1811089	0.791068728
20191122_MKY1037_07	6.6	639.2857143	662.7231638	202.341878	0.794711657
20191122_MKY1037_07	6.7	643.8571429	662.1299435	202.1376428	0.814041148
20191122_MKY1037_07	6.8	647	655.5423729	202.220117	0.850126716
20191122_MKY1037_07	6.9	652.1904762	658.6440678	202.3360267	0.858250847
20191122_MKY1037_07	7	650.0952381	656.220339	202.2100864	0.859377563
20191122_MKY1037_07	7.1	653.3333333	653.6610169	202.1886319	0.881438781
20191122_MKY1037_07	7.2	649.1428571	651.0338983	202.2953469	0.875410209
20191122_MKY1037_07	7.3	644	652.6610169	202.2574533	0.849460438
20191122_MKY1037_07	7.4	650.6190476	654.9830508	202.2786291	0.866033374
20191122_MKY1037_07	7.5	639.7142857	661.0112994	202.1905823	0.802474687
20191122_MKY1037_07	7.6	642.047619	659.7062147	202.1384787	0.815997206
20191122_MKY1037_07	7.7	639.2380952	654.6045198	202.2783505	0.823982109
20191122_MKY1037_07	7.8	641.5714286	651.9322034	202.2340485	0.842876032
20191122_MKY1037_07	7.9	654.047619	651.0056497	202.2972973	0.894409408
20191122_MKY1037_07	8	653.3333333	654.9096045	202.2646977	0.876674867
20191122_MKY1037_07	8.1	646.952381	654.3502825	202.1822235	0.854417838
20191122_MKY1037_07	8.2	647.3809524	654.8079096	202.2468654	0.854331435
20191122_MKY1037_07	8.3	644.1904762	652.6779661	202.2357203	0.850129065
20191122_MKY1037_07	8.4	646.0952381	649.2937853	202.2488158	0.870327969
20191122_MKY1037_07	8.5	646.9047619	655.1355932	202.1747005	0.851289385
20191122_MKY1037_07	8.6	645.3809524	658.4915254	202.2067428	0.833035705
20191122_MKY1037_07	8.7	647.3809524	660.0338983	202.1097799	0.834940573
20191122_MKY1037_07	8.8	647.7142857	663.0056497	202.0735581	0.825359717
20191122_MKY1037_07	8.9	645.1904762	659.0903955	202.1526888	0.830121216
20191122_MKY1037_07	9	644.9047619	657.299435	202.250209	0.83561977
20191122_MKY1037_07	9.1	641.5238095	662.2655367	202.279465	0.804764189
20191122_MKY1037_07	9.2	642.2857143	658.9830508	202.2766787	0.819508907
20191122_MKY1037_07	9.3	644	651.4350282	202.3059348	0.854083656
20191122_MKY1037_07	9.4	667.9047619	656.2316384	202.1019783	0.927115928
20191122_MKY1037_07	9.5	659.2380952	653.819209	202.2256896	0.903430856
20191122_MKY1037_07	9.6	653.6666667	652.3898305	202.3574812	0.887596458
20191122_MKY1037_07	9.7	652.952381	648.2090395	202.1744218	0.901071824
20191122_MKY1037_07	9.8	668.2380952	649.2824859	202.259961	0.955976764
20191122_MKY1037_07	9.9	682	652.039548	202.108944	0.997773556
20191122_MKY1037_07	10	681	651.259887	202.0958484	0.997122174
20191122_MKY1037_07	10.1	677.5714286	652.9039548	202.1788799	0.977275806
20191122_MKY1037_07	10.2	677.8095238	652.8022599	202.0585121	0.978574694
20191122_MKY1037_07	10.3	678.7142857	652.0677966	202.1468376	0.985046562
20191122_MKY1037_07	10.4	676.952381	648.9717514	202.2231819	0.990934417
20191122_MKY1037_07	10.5	670.2380952	651.2768362	202.1582614	0.955656488
20191122_MKY1037_07	10.6	664.6190476	652.7909605	202.1061577	0.92804971
20191122_MKY1037_07	10.7	657	647.5310734	202.0930621	0.919430849
20191122_MKY1037_07	10.8	662.047619	650.6666667	202.0796879	0.926539197
20191122_MKY1037_07	10.9	667.3333333	653.2881356	202.1181388	0.936493632
20191122_MKY1037_07	11	678.3333333	652.6045198	202.1655057	0.98140796
20191122_MKY1037_07	11.1	669.3333333	652.779661	202.2627473	0.946194328
20191122_MKY1037_07	11.2	661.3809524	645.1016949	202.1270549	0.946204926
20191122_MKY1037_07	11.3	663.1904762	647.9830508	202.2262469	0.941652982
20191122_MKY1037_07	11.4	667.8571429	648.8531073	202.1730287	0.956220309
20191122_MKY1037_07	11.5	673.2380952	654.700565	202.2281973	0.95349724
20191122_MKY1037_07	11.6	674.2380952	652.6327684	202.2209529	0.965592211
20191122_MKY1037_07	11.7	672.1428571	649.480226	202.120925	0.970242395
20191122_MKY1037_07	11.8	674.952381	643.5819209	202.0975202	1.005494767
20191122_MKY1037_07	11.9	676.2857143	642.9322034	202.1278908	1.013458983
20191122_MKY1037_07	12	673.3333333	644.6553672	202.0412371	0.994668294
20191122_MKY1037_07	12.1	678.0952381	644.5819209	202.1499025	1.013602127
20191122_MKY1037_07	12.2	687.1904762	640.3107345	202.1256617	1.067588591
20191122_MKY1037_07	12.3	679.4285714	640.8813559	202.210365	1.03455639
20191122_MKY1037_07	12.4	661.6190476	640.1242938	202.1825021	0.967516346
20191122_MKY1037_07	12.5	662.7142857	639.1016949	202.1365283	0.976082074
20191122_MKY1037_07	12.6	663.1904762	638.0677966	202.1546392	0.982294341
20191122_MKY1037_07	12.7	660.8571429	640.3672316	202.1613263	0.963502273
20191122_MKY1037_07	12.8	661.9047619	633.4293785	202.1298412	0.99679407
20191122_MKY1037_07	12.9	661.9047619	629.2372881	202.0133742	1.014840531
20191122_MKY1037_07	13	658.7142857	631.3389831	202.1393146	0.992922719
20191122_MKY1037_07	13.1	660.1428571	628.4237288	202.0977988	1.011274523
20191122_MKY1037_07	13.2	657	629.5084746	202.1028142	0.993855348
20191122_MKY1037_07	13.3	655.4285714	631.3163842	202.1905823	0.979800149
20191122_MKY1037_07	13.4	659.6666667	635.1129944	202.2078573	0.980714858
20191122_MKY1037_07	13.5	651.6190476	632.920904	202.1666202	0.957711486
20191122_MKY1037_07	13.6	660	630.7288136	202.1206464	1.000719355
20191122_MKY1037_07	13.7	655.952381	634.3220339	202.1922541	0.96919947
20191122_MKY1037_07	13.8	658.7142857	627.6949153	202.2281973	1.008691816
20191122_MKY1037_07	13.9	657.1428571	634.3502825	202.185567	0.973840202
20191122_MKY1037_07	14	651.4285714	635.480226	202.1577041	0.946299855
20191122_MKY1037_07	14.1	643.1904762	636.6723164	202.0231262	0.90861014
20191122_MKY1037_07	14.2	648.1428571	633.7740113	202.1577041	0.940226884
20191122_MKY1037_07	14.3	638.2380952	632.2937853	202.1317916	0.906574992
20191122_MKY1037_07	14.4	644.7619048	620.9830508	202.1590972	0.980813245
20191122_MKY1037_07	14.5	656.0952381	621.7344633	202.1451658	1.024219436
20191122_MKY1037_07	14.6	652.4761905	619.1299435	202.1131234	1.02088803
20191122_MKY1037_07	14.7	657.6190476	624.519774	202.1994985	1.018141929
20191122_MKY1037_07	14.8	652.0952381	625.4576271	202.195319	0.991456915
20191122_MKY1037_07	14.9	650.9047619	625.7514124	202.1922541	0.985324561
20191122_MKY1037_07	15	637.2380952	621.9435028	202.0897186	0.945649329
20191122_MKY1037_07	15.1	647.7142857	621.3333333	202.0738367	0.991437354
20191122_MKY1037_07	15.2	649.0952381	617.9887006	202.0930621	1.011953661
20191122_MKY1037_07	15.3	647.3333333	621.3163842	202.0707718	0.989940457
20191122_MKY1037_07	15.4	644.3333333	618.519774	202.1192533	0.98982909
20191122_MKY1037_07	15.5	632.7142857	616.6271186	202.1390359	0.94976898
20191122_MKY1037_07	15.6	633.952381	617.7570621	202.0752299	0.950025999
20191122_MKY1037_07	15.7	643.4285714	617.9887006	202.1061577	0.988409648
20191122_MKY1037_07	15.8	636.1428571	615.6836158	202.1635553	0.968198145
20191122_MKY1037_07	15.9	637.6190476	613.4293785	202.0858178	0.984323583
20191122_MKY1037_07	16	645.2380952	613.3333333	202.1830593	1.01680078
20191122_MKY1037_07	16.1	657.5714286	613.2655367	202.0849819	1.068913649
20191122_MKY1037_07	16.2	658.047619	609.3559322	202.1259404	1.089332791
20191122_MKY1037_07	16.3	662.2857143	612.6271186	202.0952912	1.091741226
20191122_MKY1037_07	16.4	659.6190476	609.5141243	202.0454166	1.095205764
20191122_MKY1037_07	16.5	667.4285714	607.8700565	201.9810532	1.136284919
20191122_MKY1037_07	16.6	660.3809524	602.6892655	202.0231262	1.131538296
20191122_MKY1037_07	16.7	653.2380952	604.8361582	201.9891335	1.090337996
20191122_MKY1037_07	16.8	659.1904762	599.0734463	202.022569	1.14436074
20191122_MKY1037_07	16.9	674.2380952	595.6327684	202.12399	1.227913298
20191122_MKY1037_07	17	674.3809524	597.4971751	202.0047367	1.21865898
20191122_MKY1037_07	17.1	674.1904762	599.7288136	202.1095013	1.206334378
20191122_MKY1037_07	17.2	672.2380952	606.3220339	202.0239621	1.164458872
20191122_MKY1037_07	17.3	669.2380952	609.3333333	202.0526609	1.136887634
20191122_MKY1037_07	17.4	674.9047619	606.740113	202.2538312	1.173935137
20191122_MKY1037_07	17.5	670.952381	606.2033898	202.1808303	1.159658838
20191122_MKY1037_07	17.6	682.5714286	605.3163842	202.0816383	1.213799478
20191122_MKY1037_07	17.7	680.7142857	606.3559322	202.1841739	1.200645751
20191122_MKY1037_08	-1.8	1769.809524	1629.408889	204.3460591	1.037219114
20191122_MKY1037_08	-1.7	1733.714286	1591.791111	204.1679803	1.044709753
20191122_MKY1037_08	-1.6	1717.952381	1582.604444	204.1970443	1.036559136
20191122_MKY1037_08	-1.5	1703.571429	1578.368889	204.1022167	1.022424373
20191122_MKY1037_08	-1.4	1698.238095	1572.6	204.1366995	1.023829837
20191122_MKY1037_08	-1.3	1692.571429	1567.44	204.1418719	1.023782355
20191122_MKY1037_08	-1.2	1676.761905	1561.693333	203.9640394	1.009750282
20191122_MKY1037_08	-1.1	1682	1559.373333	204.0635468	1.021175197
20191122_MKY1037_08	-1	1678.142857	1551.457778	204.0295567	1.028238458
20191122_MKY1037_08	-0.9	1661.952381	1546.146667	204.0169951	1.012810571
20191122_MKY1037_08	-0.8	1657.952381	1554.475556	203.9871921	0.993536334
20191122_MKY1037_08	-0.7	1648.761905	1545.568889	203.8300493	0.994111034
20191122_MKY1037_08	-0.6	1664.380952	1543.6	203.853202	1.020523714
20191122_MKY1037_08	-0.5	1653.047619	1544.613333	204.0871921	1.002048377
20191122_MKY1037_08	-0.4	1632.761905	1541.551111	203.9463054	0.976717676
20191122_MKY1037_08	-0.3	1624.142857	1536.613333	203.8615764	0.97170357
20191122_MKY1037_08	0	608.7619048	903.7733333	203.8546798	0
20191122_MKY1037_08	0.1	618.6190476	906.0222222	203.7566502	0.024418705
20191122_MKY1037_08	0.2	640.7142857	909.8444444	203.7775862	0.080433393
20191122_MKY1037_08	0.3	656.3333333	911.4977778	203.7536946	0.121593779
20191122_MKY1037_08	0.4	672.8571429	911.0844444	203.8652709	0.168828329
20191122_MKY1037_08	0.5	688.2857143	913.2	203.7418719	0.208377259
20191122_MKY1037_08	0.6	692.3809524	914.6711111	203.8192118	0.216980148
20191122_MKY1037_08	0.7	703.1428571	916.8977778	203.7820197	0.242833353
20191122_MKY1037_08	0.8	718.6666667	918.6266667	203.7593596	0.282788196
20191122_MKY1037_08	0.9	731.2380952	923.3511111	203.7182266	0.30823217
20191122_MKY1037_08	1	736.7619048	919.8933333	203.879803	0.33056047
20191122_MKY1037_08	1.1	747.8095238	917.0666667	203.8199507	0.367380863
20191122_MKY1037_08	1.2	757.8095238	926.4044444	203.6817734	0.375414487
20191122_MKY1037_08	1.3	762.8571429	928.16	203.6938424	0.385597913
20191122_MKY1037_08	1.4	778.6190476	927.0222222	203.5778325	0.431548805
20191122_MKY1037_08	1.5	782.5238095	927.92	203.5714286	0.440339674
20191122_MKY1037_08	1.6	783.4761905	931.5288889	203.7261084	0.434959521
20191122_MKY1037_08	1.7	779.5238095	929.7822222	203.7280788	0.427922855
20191122_MKY1037_08	1.8	783.8095238	928.0355556	203.6352217	0.443590239
20191122_MKY1037_08	1.9	794.7142857	934.7022222	203.5596059	0.458813994
20191122_MKY1037_08	2	788.1904762	929.0222222	203.58867	0.453488479
20191122_MKY1037_08	2.1	785.1904762	930.5155556	203.7507389	0.441865922
20191122_MKY1037_08	2.2	786.952381	928.4	203.7283251	0.451386248
20191122_MKY1037_08	2.3	797.047619	927.9288889	203.6236453	0.480286869
20191122_MKY1037_08	2.4	802.4285714	924.9466667	203.7246305	0.50187502
20191122_MKY1037_08	2.5	813.1428571	929.2711111	203.6800493	0.521480386
20191122_MKY1037_08	2.6	825.3809524	932.4177778	203.6741379	0.547744844
20191122_MKY1037_08	2.7	827.2857143	932.8133333	203.6135468	0.552056257
20191122_MKY1037_08	2.8	828.2380952	931.9333333	203.6221675	0.556722321
20191122_MKY1037_08	2.9	832.2857143	935.8088889	203.6640394	0.558678088
20191122_MKY1037_08	3	836.3809524	926.8266667	203.7366995	0.591219579
20191122_MKY1037_08	3.1	847.3809524	928.76	203.6204434	0.616863783
20191122_MKY1037_08	3.2	844	929.9822222	203.5458128	0.604624374
20191122_MKY1037_08	3.3	847.6666667	929.8933333	203.5174877	0.614917247
20191122_MKY1037_08	3.4	854.6666667	932.3244444	203.5302956	0.628170766
20191122_MKY1037_08	3.5	855.3809524	929.8622222	203.5625616	0.636164243
20191122_MKY1037_08	3.6	848.5714286	923.4044444	203.5381773	0.633361646
20191122_MKY1037_08	3.7	849.3333333	919.0488889	203.61133	0.646345253
20191122_MKY1037_08	3.8	864.7142857	921.24	203.6029557	0.6836006
20191122_MKY1037_08	3.9	849.4285714	919.7955556	203.6086207	0.644734385
20191122_MKY1037_08	4	858.047619	918.32	203.5399015	0.6725176
20191122_MKY1037_08	4.1	846.1428571	916.5777778	203.5495074	0.643676196
20191122_MKY1037_08	4.2	844.7619048	913.8	203.6251232	0.646807659
20191122_MKY1037_08	4.3	847.4761905	914.6711111	203.6	0.652222246
20191122_MKY1037_08	4.4	866.5714286	917.6488889	203.573399	0.698035329
20191122_MKY1037_08	4.5	866.8571429	918.1377778	203.429064	0.697594721
20191122_MKY1037_08	4.6	866.7142857	914.8311111	203.6655172	0.705755178
20191122_MKY1037_08	4.7	863.6666667	912.6622222	203.5689655	0.702889022
20191122_MKY1037_08	4.8	865.8571429	909.2222222	203.5995074	0.718126889
20191122_MKY1037_08	4.9	866.1904762	908.8044444	203.5615764	0.720185182
20191122_MKY1037_08	5	860.8095238	911.6222222	203.6793103	0.697545381
20191122_MKY1037_08	5.1	858.4761905	907.7022222	203.6935961	0.70124066
20191122_MKY1037_08	5.2	861.1428571	905.1866667	203.6561576	0.715482082
20191122_MKY1037_08	5.3	877.5238095	906.0488889	203.6596059	0.759704053
20191122_MKY1037_08	5.4	883.2380952	908.9644444	203.5618227	0.767963745
20191122_MKY1037_08	5.5	880.5714286	909.6444444	203.5236453	0.758584353
20191122_MKY1037_08	5.6	872.6666667	906.4177778	203.5440887	0.744929635
20191122_MKY1037_08	5.7	876.7619048	903.0222222	203.5859606	0.765820502
20191122_MKY1037_08	5.8	880.4761905	901.2977778	203.4820197	0.781192297
20191122_MKY1037_08	5.9	887.2380952	903.8933333	203.5958128	0.793269819
20191122_MKY1037_08	6	870.5238095	899.1111111	203.5938424	0.758725266
20191122_MKY1037_08	6.1	869.8571429	898.6044444	203.3923645	0.758230231
20191122_MKY1037_08	6.2	873.1904762	902.6666667	203.5576355	0.756610419
20191122_MKY1037_08	6.3	869.2857143	896.1155556	203.5054187	0.76344232
20191122_MKY1037_08	6.4	866.9047619	894.5022222	203.4073892	0.761057459
20191122_MKY1037_08	6.5	871.2380952	891.8666667	203.5330049	0.780931755
20191122_MKY1037_08	6.6	868.2857143	894.2444444	203.4605911	0.76575332
20191122_MKY1037_08	6.7	873.1428571	889.1955556	203.43867	0.79401651
20191122_MKY1037_08	6.8	867.047619	888.7066667	203.529803	0.777656577
20191122_MKY1037_08	6.9	871.1904762	882.3244444	203.4731527	0.80799368
20191122_MKY1037_08	7	882.4285714	883.4	203.5482759	0.837857286
20191122_MKY1037_08	7.1	871.7619048	886.7111111	203.4413793	0.797067847
20191122_MKY1037_08	7.2	868.7142857	882.8977778	203.4637931	0.79906936
20191122_MKY1037_08	7.3	868.3809524	877.2977778	203.4689655	0.814312773
20191122_MKY1037_08	7.4	868.2380952	879.2177778	203.6076355	0.808292236
20191122_MKY1037_08	7.5	868.9047619	877.6844444	203.462069	0.814733897
20191122_MKY1037_08	7.6	879.3333333	879.0444444	203.4640394	0.84156024
20191122_MKY1037_08	7.7	867.9047619	872.7822222	203.420936	0.82617327
20191122_MKY1037_08	7.8	867	875.7111111	203.5315271	0.814858438
20191122_MKY1037_08	7.9	873.7619048	877.1111111	203.532266	0.830789712
20191122_MKY1037_08	8	874.5238095	872.1422222	203.5229064	0.847811946
20191122_MKY1037_08	8.1	865.4761905	873.8977778	203.5453202	0.815649443
20191122_MKY1037_08	8.2	881.7619048	878.0355556	203.4610837	0.851725434
20191122_MKY1037_08	8.3	884.4285714	879.4044444	203.5564039	0.855534725
20191122_MKY1037_08	8.4	885.047619	877.2577778	203.4825123	0.863767736
20191122_MKY1037_08	8.5	874.0952381	871.2311111	203.3714286	0.849261151
20191122_MKY1037_08	8.6	873.8095238	872.1466667	203.4874384	0.845667573
20191122_MKY1037_08	8.7	867.2380952	873.7644444	203.4815271	0.821286584
20191122_MKY1037_08	8.8	859.6666667	868.7066667	203.4669951	0.813602669
20191122_MKY1037_08	8.9	857.4285714	863.5911111	203.4463054	0.822087562
20191122_MKY1037_08	9	863.5714286	863.4355556	203.4096059	0.841117928
20191122_MKY1037_08	9.1	869.6190476	864.7822222	203.4763547	0.855295854
20191122_MKY1037_08	9.2	862.952381	862.7111111	203.4371921	0.841437268
20191122_MKY1037_08	9.3	872.047619	865.5155556	203.3534483	0.860383449
20191122_MKY1037_08	9.4	873.1428571	867.4622222	203.4475369	0.857771004
20191122_MKY1037_08	9.5	873.3809524	864.7511111	203.3561576	0.866732606
20191122_MKY1037_08	9.6	872.5714286	863.4577778	203.382266	0.868246585
20191122_MKY1037_08	9.7	863.4761905	860.5333333	203.3403941	0.849638934
20191122_MKY1037_08	9.8	867.6190476	860.4355556	203.4337438	0.862515661
20191122_MKY1037_08	9.9	878.6666667	861.2355556	203.3985222	0.893559186
20191122_MKY1037_08	10	864.2380952	854.72	203.4150246	0.869856023
20191122_MKY1037_08	10.1	876.5238095	854.7777778	203.3403941	0.907289944
20191122_MKY1037_08	10.2	867.3333333	855.8711111	203.3923645	0.875746669
20191122_MKY1037_08	10.3	870.6666667	861.2177778	203.4187192	0.869358405
20191122_MKY1037_08	10.4	874.7142857	856.2177778	203.3938424	0.897220174
20191122_MKY1037_08	10.5	870.9047619	854.0666667	203.4288177	0.892326037
20191122_MKY1037_08	10.6	871.047619	856.9911111	203.3022167	0.883597702
20191122_MKY1037_08	10.7	873.4285714	855.1688889	203.3817734	0.896585342
20191122_MKY1037_08	10.8	875.8571429	854.0577778	203.4396552	0.907537288
20191122_MKY1037_08	10.9	871.1428571	855.3155556	203.3285714	0.889126956
20191122_MKY1037_08	11	874.8095238	856	203.3844828	0.898194893
20191122_MKY1037_08	11.1	874.4761905	855.2444444	203.4458128	0.899558997
20191122_MKY1037_08	11.2	878.0952381	853.6	203.2288177	0.915830496
20191122_MKY1037_08	11.3	879.8571429	855.4666667	203.2805419	0.915301044
20191122_MKY1037_08	11.4	880.4761905	855.7866667	203.4034483	0.916192814
20191122_MKY1037_08	11.5	873.7619048	853.3288889	203.4396552	0.903418749
20191122_MKY1037_08	11.6	882.5238095	853.8755556	203.3066502	0.928540463
20191122_MKY1037_08	11.7	874	853.3511111	203.3509852	0.904070478
20191122_MKY1037_08	11.8	868.3809524	853.08	203.394335	0.887682532
20191122_MKY1037_08	11.9	879.2380952	854.7644444	203.3034483	0.91563873
20191122_MKY1037_08	12	868.9047619	851.88	203.2684729	0.89306133
20191122_MKY1037_08	12.1	871.7142857	849.4533333	203.3403941	0.909428225
20191122_MKY1037_08	12.2	870.3333333	850.3111111	203.3610837	0.902437154
20191122_MKY1037_08	12.3	869.2857143	846.2888889	203.2938424	0.912044153
20191122_MKY1037_08	12.4	868.1904762	847.5422222	203.2743842	0.904632278
20191122_MKY1037_08	12.5	872.5238095	849.8533333	203.4039409	0.910656025
20191122_MKY1037_08	12.6	871.2857143	851.2311111	203.2758621	0.902441066
20191122_MKY1037_08	12.7	864.1428571	844.9688889	203.4381773	0.900321301
20191122_MKY1037_08	12.8	864.3809524	840.6133333	203.3724138	0.915100922
20191122_MKY1037_08	12.9	866.3333333	838.9155556	203.3463054	0.926751785
20191122_MKY1037_08	13	871.5714286	842.2177778	203.287931	0.932342558
20191122_MKY1037_08	13.1	886.5238095	842.9911111	203.4480296	0.976475922
20191122_MKY1037_08	13.2	889.8095238	842.68	203.4721675	0.987770694
20191122_MKY1037_08	13.3	882	841.4711111	203.3596059	0.967391296
20191122_MKY1037_08	13.4	882.6666667	846.3155556	203.2933498	0.95346478
20191122_MKY1037_08	13.5	879	842.1866667	203.2366995	0.955626324
20191122_MKY1037_08	13.6	880	844.64	203.2770936	0.95067422
20191122_MKY1037_08	13.7	872.5714286	842.3333333	203.3662562	0.935098087
20191122_MKY1037_08	13.8	873.952381	840.8044444	203.2458128	0.944409989
20191122_MKY1037_08	13.9	880.047619	844.5511111	203.3064039	0.951119097
20191122_MKY1037_08	14	880.2380952	842.8755556	203.3901478	0.957243107
20191122_MKY1037_08	14.1	875.9047619	842.6222222	203.2933498	0.944542783
20191122_MKY1037_08	14.2	862.952381	835.9955556	203.3586207	0.925697308
20191122_MKY1037_08	14.3	873.5714286	837.5955556	203.2817734	0.953832884
20191122_MKY1037_08	14.4	873.8571429	836.9644444	203.3394089	0.956841927
20191122_MKY1037_08	14.5	865.8095238	833.1688889	203.2453202	0.94406061
20191122_MKY1037_08	14.6	856.7619048	825.8577778	203.2504926	0.939712028
20191122_MKY1037_08	14.7	861.5238095	828.1111111	203.2246305	0.947358088
20191122_MKY1037_08	14.8	862.047619	821.1555556	203.3024631	0.972717482
20191122_MKY1037_08	14.9	857.7142857	818.2488889	203.3194581	0.968717574
20191122_MKY1037_08	15	855.7619048	820.9688889	203.2761084	0.953057329
20191122_MKY1037_08	15.1	867.6190476	828.3155556	203.3608374	0.96614735
20191122_MKY1037_08	15.2	876.1428571	826.7955556	203.2970443	0.998570756
20191122_MKY1037_08	15.3	863.7619048	820.9511111	203.3330049	0.978964222
20191122_MKY1037_08	15.4	869.6666667	819.7244444	203.3460591	1.002319476
20191122_MKY1037_08	15.5	863.9047619	817.6044444	203.2490148	0.991027688
20191122_MKY1037_08	15.6	859.3333333	816.6222222	203.2460591	0.97959622
20191122_MKY1037_08	15.7	853.0952381	816.0177778	203.2726601	0.961400765
20191122_MKY1037_08	15.8	856.4761905	816.9155556	203.2714286	0.969295258
20191122_MKY1037_08	15.9	853.3333333	815.8355556	203.2876847	0.962808275
20191122_MKY1037_08	16	852.9047619	812.7555556	203.3007389	0.972105398
20191122_MKY1037_08	16.1	847.4285714	812.1422222	203.2374384	0.956294829
20191122_MKY1037_08	16.2	852.7142857	811.8	203.06133	0.974766835
20191122_MKY1037_08	16.3	844.3809524	809.7066667	203.2706897	0.954752288
20191122_MKY1037_08	16.4	840.9047619	807.3777778	203.2652709	0.951402886
20191122_MKY1037_08	16.5	838.3809524	808.9333333	203.2465517	0.937681397
20191122_MKY1037_08	16.6	838.1904762	809.4755556	203.2931034	0.935191223
20191122_MKY1037_08	16.7	837.4285714	809.3555556	203.3463054	0.933105493
20191122_MKY1037_08	16.8	839.7619048	806.5466667	203.387931	0.950547013
20191122_MKY1037_08	16.9	843.4285714	808.64	203.253202	0.955326478
20191122_MKY1037_08	17	841.0952381	808.6933333	203.2305419	0.947449642
20191122_MKY1037_08	17.1	839.4285714	810.4977778	203.3162562	0.935744899
20191122_MKY1037_08	17.2	844.1428571	815.3111111	203.2881773	0.934670307
20191122_MKY1037_08	17.3	848.2380952	815.3777778	203.3514778	0.947798877
20191122_MKY1037_08	17.4	851.3809524	814.9155556	203.2455665	0.959617034
20191122_MKY1037_08	17.5	844.4761905	815.2222222	203.294335	0.936061142
20191122_MKY1037_08	17.6	851.0952381	817.1511111	203.2633005	0.950995558
20191122_MKY1037_08	17.7	860.3333333	817.8888889	203.2359606	0.978442367
20191122_MKY1037_08	17.8	856.8571429	813.2088889	203.2283251	0.983433762
20191122_MKY1037_08	17.9	854.8571429	811.0933333	203.232266	0.984310598
20191122_MKY1037_08	18	855.3333333	809.1333333	203.2908867	0.99280964
20191122_MKY1037_08	18.1	858.2857143	808.7911111	203.2044335	1.003725145
20191122_MKY1037_09	-1.9	1443.857143	1191.203125	202.4272269	0.964173606
20191122_MKY1037_09	-1.8	1406.761905	1166	202.3751326	0.953516718
20191122_MKY1037_09	-1.7	1403.666667	1161.552083	202.3834836	0.958347559
20191122_MKY1037_09	-1.6	1379.047619	1150.328125	202.3290032	0.937386609
20191122_MKY1037_09	-1.5	1391.380952	1150.473958	202.2962619	0.961452264
20191122_MKY1037_09	-1.4	1386.333333	1147.479167	202.3390774	0.958905545
20191122_MKY1037_09	-1.3	1399.571429	1148	202.2940085	0.983888089
20191122_MKY1037_09	-1.2	1393.238095	1143.401042	202.3304613	0.982887222
20191122_MKY1037_09	-1.1	1382.380952	1132.046875	202.2591463	0.989944753
20191122_MKY1037_09	-1	1396.666667	1137.239583	202.2873807	1.005424185
20191122_MKY1037_09	-0.9	1401.52381	1133.703125	202.2596766	1.024319928
20191122_MKY1037_09	-0.8	1385.285714	1130.151042	202.2383351	1.000687705
20191122_MKY1037_09	-0.7	1369.857143	1132.5625	202.2849947	0.963341978
20191122_MKY1037_09	-0.6	1380.47619	1126.848958	202.2730647	0.999488772
20191122_MKY1037_09	-0.5	1382.333333	1121.46875	202.2501326	1.017286222
20191122_MKY1037_09	-0.4	1369.047619	1115.395833	202.1784199	1.00595006
20191122_MKY1037_09	-0.3	1357.333333	1114.786458	202.1908802	0.983441916
20191122_MKY1037_09	0	504.952381	610.0729167	202.0408271	0
20191122_MKY1037_09	0.1	508.5714286	606.8489583	202.099947	0.027840242
20191122_MKY1037_09	0.2	515.0952381	605.8645833	202.1048515	0.061662399
20191122_MKY1037_09	0.3	519.9047619	606.296875	202.1780223	0.082389495
20191122_MKY1037_09	0.4	541.3333333	613.5885417	202.082052	0.154149486
20191122_MKY1037_09	0.5	550.7142857	614.8645833	202.0918611	0.19205489
20191122_MKY1037_09	0.6	552.952381	612.296875	202.0619035	0.212259708
20191122_MKY1037_09	0.7	556.8571429	611.5260417	202.0128579	0.23323323
20191122_MKY1037_09	0.8	570.7142857	614.4114583	202.0866914	0.284940893
20191122_MKY1037_09	0.9	576.4285714	616.7083333	201.970175	0.30158186
20191122_MKY1037_09	1	584.3333333	614.9635417	202.1117444	0.344664181
20191122_MKY1037_09	1.1	584.6666667	620.9635417	202.1588017	0.321222643
20191122_MKY1037_09	1.2	593.2857143	622.546875	202.1210233	0.353293951
20191122_MKY1037_09	1.3	589.1904762	620.0833333	202.0787381	0.345201992
20191122_MKY1037_09	1.4	589.8571429	618.0833333	202.0740986	0.356580104
20191122_MKY1037_09	1.5	594	623.1041667	202.0630965	0.354185631
20191122_MKY1037_09	1.6	605	626.9583333	202.0819194	0.386959067
20191122_MKY1037_09	1.7	599.047619	624.59375	202.0888123	0.370458647
20191122_MKY1037_09	1.8	605.952381	625.4947917	202.0387063	0.397353129
20191122_MKY1037_09	1.9	617.0952381	626.5833333	202.1064422	0.442066705
20191122_MKY1037_09	2	613.0952381	619.6197917	202.0038441	0.454710233
20191122_MKY1037_09	2.1	619.9047619	624.15625	202.0645546	0.465140003
20191122_MKY1037_09	2.2	624.1428571	626.4739583	202.0249205	0.47374619
20191122_MKY1037_09	2.3	621.3333333	620.6875	201.9900583	0.486963615
20191122_MKY1037_09	2.4	613.9047619	621.2708333	201.9711029	0.451057176
20191122_MKY1037_09	2.5	611.3809524	619.234375	202.0709173	0.448693081
20191122_MKY1037_09	2.6	614.4761905	618.0833333	202.0718452	0.467773608
20191122_MKY1037_09	2.7	610.3333333	614.5052083	202.0542153	0.465060317
20191122_MKY1037_09	2.8	621.9047619	621.5729167	202.1157211	0.485551877
20191122_MKY1037_09	2.9	616.4285714	620	201.9525451	0.468013471
20191122_MKY1037_09	3	626.2857143	620.9270833	202.0677359	0.508103293
20191122_MKY1037_09	3.1	623.1904762	618.21875	202.050106	0.506511898
20191122_MKY1037_09	3.2	639.0952381	619.8385417	202.090403	0.570677395
20191122_MKY1037_09	3.3	645.6666667	622.2760417	202.0654825	0.588654313
20191122_MKY1037_09	3.4	654.3333333	629.4166667	202.0562036	0.593613888
20191122_MKY1037_09	3.5	646.8095238	624.3177083	202.0877519	0.584154378
20191122_MKY1037_09	3.6	644.4285714	620.0260417	201.9528102	0.593736772
20191122_MKY1037_09	3.7	652.2857143	625.0833333	202.0026511	0.60487307
20191122_MKY1037_09	3.8	646.3809524	621.140625	202.0295599	0.597221154
20191122_MKY1037_09	3.9	647.8571429	620.2239583	202.0699894	0.608232203
20191122_MKY1037_09	4	651.952381	625.0989583	202.090403	0.603343656
20191122_MKY1037_09	4.1	657.047619	625.4322917	202.0629639	0.624375547
20191122_MKY1037_09	4.2	661.7619048	627.0416667	202.0823171	0.63757873
20191122_MKY1037_09	4.3	660.4761905	624.9635417	202.0934518	0.641858092
20191122_MKY1037_09	4.4	658.9047619	620.8333333	202.054878	0.654880253
20191122_MKY1037_09	4.5	664.1904762	625.0052083	202.109491	0.658166021
20191122_MKY1037_09	4.6	666.7142857	629.3854167	202.040562	0.648191308
20191122_MKY1037_09	4.7	671.952381	629.5833333	202.0490456	0.6702692
20191122_MKY1037_09	4.8	669	630.0104167	201.9949629	0.655224476
20191122_MKY1037_09	4.9	680.5714286	629.71875	202.0102068	0.707462071
20191122_MKY1037_09	5	666.8095238	628.6510417	201.9998674	0.652111692
20191122_MKY1037_09	5.1	670.8571429	626.7604167	201.9736214	0.679115478
20191122_MKY1037_09	5.2	667.4761905	622.25	201.9634146	0.68625335
20191122_MKY1037_09	5.3	666	623.3125	202.0979586	0.674483468
20191122_MKY1037_09	5.4	667.1904762	621.5364583	202.0161718	0.688538804
20191122_MKY1037_09	5.5	675.8095238	625.4635417	202.0341994	0.70747131
20191122_MKY1037_09	5.6	680.2857143	624.6458333	201.9620891	0.731398042
20191122_MKY1037_09	5.7	690.3333333	627.0833333	201.9705726	0.763620345
20191122_MKY1037_09	5.8	693.7619048	630.5885417	201.9756098	0.761001465
20191122_MKY1037_09	5.9	686.4761905	627.65625	201.9152969	0.743656586
20191122_MKY1037_09	6	680.4285714	626.7760417	201.9459173	0.721358816
20191122_MKY1037_09	6.1	674	626.2395833	201.9312036	0.695559028
20191122_MKY1037_09	6.2	680.047619	625.7916667	201.98807	0.724608854
20191122_MKY1037_09	6.3	670.952381	624.046875	201.9278897	0.692850609
20191122_MKY1037_09	6.4	674.4761905	622.5885417	202.0029162	0.715869096
20191122_MKY1037_09	6.5	675.7619048	623.2864583	201.9380965	0.718070661
20191122_MKY1037_09	6.6	678.3809524	620.4114583	202.0510339	0.744416673
20191122_MKY1037_09	6.7	675.5714286	619.5729167	201.9899258	0.73603287
20191122_MKY1037_09	6.8	680.2857143	618.734375	202.0339343	0.761604603
20191122_MKY1037_09	6.9	677.1904762	619.84375	201.9172853	0.741887147
20191122_MKY1037_09	7	689.8571429	623.390625	202.0067603	0.780436475
20191122_MKY1037_09	7.1	697.5714286	621.078125	201.9354454	0.82696922
20191122_MKY1037_09	7.2	701.4285714	621.75	201.9029692	0.8406489
20191122_MKY1037_09	7.3	694.5714286	619.3645833	201.9715005	0.822615475
20191122_MKY1037_09	7.4	703.2857143	619.2916667	201.9927094	0.862257107
20191122_MKY1037_09	7.5	694.7142857	618.1145833	201.9728261	0.829922405
20191122_MKY1037_09	7.6	701.3809524	616.5885417	201.9496288	0.868301103
20191122_MKY1037_09	7.7	700.6190476	613.046875	201.9935048	0.884359051
20191122_MKY1037_09	7.8	700.5238095	612.3854167	202.0544804	0.887656571
20191122_MKY1037_09	7.9	699.952381	609.9895833	201.8822906	0.898255189
20191122_MKY1037_09	8	696.4285714	609.0572917	202.0144486	0.887375748
20191122_MKY1037_09	8.1	692.7619048	607.2760417	202.0368505	0.880428898
20191122_MKY1037_09	8.2	692.7619048	606.9166667	201.9363733	0.882349629
20191122_MKY1037_09	8.3	692.2857143	609.203125	201.9973489	0.867425478
20191122_MKY1037_09	8.4	677.6190476	606.0208333	201.9728261	0.817016161
20191122_MKY1037_09	8.5	678.952381	606.59375	202.0144486	0.820110426
20191122_MKY1037_09	8.6	681	607.3697917	201.9473754	0.825304716
20191122_MKY1037_09	8.7	679.2857143	608.7083333	201.9862142	0.810111145
20191122_MKY1037_09	8.8	673.952381	606.2552083	201.9483033	0.79867369
20191122_MKY1037_09	8.9	672.8095238	608.8541667	201.9545334	0.779390541
20191122_MKY1037_09	9	670.2857143	606.3854167	201.9901909	0.780963659
20191122_MKY1037_09	9.1	674.952381	603.7916667	201.8059385	0.816679346
20191122_MKY1037_09	9.2	677.4285714	602.90625	201.9829003	0.833314918
20191122_MKY1037_09	9.3	675.4761905	603.9635417	201.8927625	0.818253625
20191122_MKY1037_09	9.4	678.4761905	606.953125	201.9949629	0.815919169
20191122_MKY1037_09	9.5	679.6190476	603.921875	201.9573171	0.837901946
20191122_MKY1037_09	9.6	670.1428571	600.1927083	201.9435313	0.814088657
20191122_MKY1037_09	9.7	667.1904762	600.3177083	201.9569194	0.799481245
20191122_MKY1037_09	9.8	657.2857143	596.6822917	202.0051697	0.772578801
20191122_MKY1037_09	9.9	655.5714286	597.3020833	201.9346501	0.760982666
20191122_MKY1037_09	10	656.2380952	597.3958333	201.920334	0.763628962
20191122_MKY1037_09	10.1	665.047619	596.4010417	201.907211	0.811021515
20191122_MKY1037_09	10.2	664	595.7760417	201.7864528	0.8094245
20191122_MKY1037_09	10.3	663.4761905	592.796875	201.9569194	0.823850375
20191122_MKY1037_09	10.4	657.9047619	594.4635417	201.9208643	0.787730889
20191122_MKY1037_09	10.5	668.1428571	596.2395833	201.9471103	0.826707694
20191122_MKY1037_09	10.6	666.3333333	595.0364583	201.8180011	0.82474599
20191122_MKY1037_09	10.7	666	591.0364583	201.9948303	0.846112284
20191122_MKY1037_09	10.8	663.7619048	588.8072917	201.970175	0.848132153
20191122_MKY1037_09	10.9	666.7619048	587.7239583	201.9301432	0.869003748
20191122_MKY1037_09	11	664.5238095	586.0572917	201.8751326	0.867823874
20191122_MKY1037_09	11.1	670.9047619	586.0520833	202.0424178	0.899243266
20191122_MKY1037_09	11.2	669.1904762	586.109375	201.923913	0.890389057
20191122_MKY1037_09	11.3	668.7619048	586.2135417	201.9620891	0.887714268
20191122_MKY1037_09	11.4	670.8571429	587.8802083	201.9156946	0.888009064
20191122_MKY1037_09	11.5	668.3333333	590.2552083	201.9505567	0.861870289
20191122_MKY1037_09	11.6	669.2380952	590.7083333	201.901246	0.86356463
20191122_MKY1037_09	11.7	681.5714286	595.3958333	201.8918346	0.895542749
20191122_MKY1037_09	11.8	673.1428571	592.7760417	201.7966596	0.870284453
20191122_MKY1037_09	11.9	678.047619	591.8489583	201.8944857	0.899399322
20191122_MKY1037_09	12	685.047619	597.5208333	201.7457582	0.899596306
20191122_MKY1037_09	12.1	680.9047619	594.4791667	201.8669141	0.897673773
20191122_MKY1037_09	12.2	683.2857143	592.6614583	201.8830859	0.919802687
20191122_MKY1037_09	12.3	683.6190476	593.7291667	201.9052227	0.915118353
20191122_MKY1037_09	12.4	690.5714286	594.328125	202.0096766	0.945003474
20191122_MKY1037_09	12.5	688.8571429	594.203125	201.8724814	0.937377816
20191122_MKY1037_09	12.6	688.7619048	593.2447917	201.8576352	0.94261404
20191122_MKY1037_09	12.7	681.5714286	593.4270833	201.9392895	0.907110843
20191122_MKY1037_09	12.8	679.9047619	594.9479167	201.9540032	0.890249897
20191122_MKY1037_09	12.9	665.4285714	593.5364583	201.9172853	0.828993117
20191122_MKY1037_09	13	676.047619	593.84375	201.8146872	0.878055025
20191122_MKY1037_09	13.1	670.4761905	593.8333333	201.8572375	0.851451647
20191122_MKY1037_09	13.2	675.1428571	594.1614583	201.8458378	0.871912425
20191122_MKY1037_09	13.3	675.047619	594.59375	201.830859	0.868947113
20191122_MKY1037_09	13.4	669.7142857	593.015625	201.9483033	0.852573505
20191122_MKY1037_09	13.5	672.2857143	592.1979167	201.9249735	0.86964025
20191122_MKY1037_09	13.6	672.6190476	593.8489583	201.9142365	0.861688357
20191122_MKY1037_09	13.7	673.6190476	592.640625	201.8506098	0.873412232
20191122_MKY1037_09	13.8	669.4285714	588.4739583	201.8374867	0.877479185
20191122_MKY1037_09	13.9	666.7619048	587.5885417	201.8898462	0.869758362
20191122_MKY1037_09	14	684	592.1145833	201.86307	0.926463023
20191122_MKY1037_09	14.1	682.5714286	596.5052083	201.9626193	0.893938703
20191122_MKY1037_09	14.2	682.952381	596.828125	201.8658537	0.893779266
20191122_MKY1037_09	14.3	686	594.0677083	201.846368	0.924465753
20191122_MKY1037_09	14.4	694.3333333	592.7239583	201.8784464	0.972537139
20191122_MKY1037_09	14.5	688.7619048	593.8177083	201.9229852	0.939273309
20191122_MKY1037_09	14.6	678.7619048	590.3072917	201.8974019	0.911964132
20191122_MKY1037_09	14.7	685.2380952	588.1822917	201.9180806	0.956180434
20191122_MKY1037_09	14.8	682.1904762	589.5677083	201.8719512	0.932952886
20191122_MKY1037_09	14.9	681.1904762	591.8125	201.8557794	0.914715843
20191122_MKY1037_09	15	684.5714286	590.4427083	201.8238335	0.939167726
20191122_MKY1037_09	15.1	674.6190476	585.234375	201.8009014	0.922075194
20191122_MKY1037_09	15.2	675.1904762	585.9635417	201.9406151	0.9206311
20191122_MKY1037_09	15.3	666.5238095	580.8125	201.8563097	0.909037008
20191122_MKY1037_09	15.4	673.047619	583.984375	201.8256893	0.921955944
20191122_MKY1037_09	15.5	670.1428571	587.2604167	201.8382821	0.88811685
20191122_MKY1037_09	15.6	671.7619048	584.0989583	201.8479586	0.914967117
20191122_MKY1037_09	15.7	675.8095238	585.4739583	201.8478261	0.926512523
20191122_MKY1037_09	15.8	669.9047619	582.6197917	201.8704931	0.914801377
20191122_MKY1037_09	15.9	673.952381	585.1302083	201.8358961	0.919476813
20191122_MKY1037_09	16	684.1904762	587.5625	201.8974019	0.954829501
20191122_MKY1037_09	16.1	673.7142857	584.40625	201.832052	0.922682594
20191122_MKY1037_09	16.2	666.6190476	581.6822917	201.8889183	0.904268332
20191122_MKY1037_09	16.3	670.952381	586.03125	201.9183457	0.89946652
20191122_MKY1037_09	16.4	668.2380952	579.890625	201.8251591	0.923139582
20191122_MKY1037_09	16.5	665.9047619	579.984375	201.902439	0.911058726
20191122_MKY1037_09	16.6	671.1428571	584.3958333	201.9192736	0.910213494
20191122_MKY1037_09	16.7	659.7142857	582.203125	201.8279427	0.866945556
20191122_MKY1037_09	16.8	673.8571429	584.1927083	201.9003181	0.924757588
20191122_MKY1037_09	16.9	664.4285714	583.84375	201.9746819	0.880571212
20191122_MKY1037_09	17	664.7142857	581.7135417	201.7865854	0.89454603
20191122_MKY1037_09	17.1	671.3333333	583.0833333	201.8255567	0.918982811
20191122_MKY1037_09	17.2	666.5714286	584.9791667	201.8304613	0.884187373
20191122_MKY1037_09	17.3	677.5238095	581.9375	201.8661188	0.956608381
20191122_MKY1037_09	17.4	680.6190476	586.015625	201.8950159	0.94681924
20191122_MKY1037_09	17.5	675.0952381	583.921875	201.771474	0.932340325
20191122_MKY1037_09	17.6	673.7619048	584	201.7444327	0.925279143
20191122_MKY1037_09	17.7	659.8095238	581.046875	201.846368	0.874332728
20191122_MKY1037_09	17.8	667.6666667	579.5572917	201.9103924	0.922441621
20191122_MKY1037_09	17.9	654.1428571	576.6041667	201.8307264	0.87280649
20191122_MKY1037_09	18	659.2380952	573.1302083	201.8286055	0.919804868
20191122_MKY1037_14	-1.8	1001.761905	852.3142857	201.780648	1.009595312
20191122_MKY1037_14	-1.7	952.2380952	812.6142857	201.8358144	1.006709238
20191122_MKY1037_14	-1.6	926.6190476	796.3714286	201.6751313	0.982253011
20191122_MKY1037_14	-1.5	918.1428571	786.4	201.5328371	0.998168439
20191122_MKY1037_14	-1.4	922.7619048	784.0714286	201.635289	1.031005181
20191122_MKY1037_14	-1.3	928.8095238	782.5714286	201.4938704	1.065569431
20191122_MKY1037_14	-1.2	920.6666667	779.9428571	201.6112084	1.044288754
20191122_MKY1037_14	-1.1	908.4285714	777.3928571	201.5617338	1.004054281
20191122_MKY1037_14	-1	902.8571429	773.4	201.5218914	1.001024526
20191122_MKY1037_14	-0.9	895.0952381	765.2357143	201.482049	1.011170154
20191122_MKY1037_14	-0.8	887.0952381	768.5714286	201.5884413	0.956806799
20191122_MKY1037_14	-0.7	887	765.3642857	201.4417688	0.973782593
20191122_MKY1037_14	-0.6	897.4761905	766.3071429	201.5521016	1.016044641
20191122_MKY1037_14	-0.5	892.3809524	763.3142857	201.540718	1.009640599
20191122_MKY1037_14	-0.4	894.1428571	761.4142857	201.3607706	1.028125149
20191122_MKY1037_14	-0.3	888.8571429	761.4642857	201.4557793	1.003861661
20191122_MKY1037_14	0	376.952381	411.8785714	201.3909807	0
20191122_MKY1037_14	0.1	374.3333333	406.95	201.3528897	0.018592284
20191122_MKY1037_14	0.2	374.7619048	406.75	201.2377408	0.02622958
20191122_MKY1037_14	0.3	379	407.5214286	201.2894046	0.070508128
20191122_MKY1037_14	0.4	387.6666667	411.7857143	201.2964098	0.131013684
20191122_MKY1037_14	0.5	390.7619048	414.8	201.3537653	0.136031924
20191122_MKY1037_14	0.6	392.3333333	413.9428571	201.1992119	0.164211428
20191122_MKY1037_14	0.7	395.9047619	414.4285714	201.2556918	0.201669167
20191122_MKY1037_14	0.8	397.5714286	416.5357143	201.3301226	0.198540818
20191122_MKY1037_14	0.9	404.1428571	418.5428571	201.2758319	0.254279032
20191122_MKY1037_14	1	403.6190476	418.4357143	201.4119965	0.249190448
20191122_MKY1037_14	1.1	412.3333333	421.3357143	201.247373	0.319026111
20191122_MKY1037_14	1.2	424.1904762	423.2642857	201.2885289	0.434045084
20191122_MKY1037_14	1.3	419.3333333	419.8857143	201.4163748	0.416946606
20191122_MKY1037_14	1.4	420.047619	420.1857143	201.2977233	0.421788448
20191122_MKY1037_14	1.5	423.5238095	419.9142857	201.3077933	0.4655302
20191122_MKY1037_14	1.6	424	419.3	201.2670753	0.478403027
20191122_MKY1037_14	1.7	429.2857143	420.7142857	201.1795096	0.523024641
20191122_MKY1037_14	1.8	428.6190476	420.75	201.2732049	0.514884977
20191122_MKY1037_14	1.9	426.047619	419.4142857	201.3936077	0.501033452
20191122_MKY1037_14	2	430.9047619	419.7071429	201.3209282	0.554233554
20191122_MKY1037_14	2.1	428.4761905	419.9071429	201.3226795	0.52342998
20191122_MKY1037_14	2.2	435.952381	421.2285714	201.3200525	0.594243375
20191122_MKY1037_14	2.3	427.952381	419.2357143	201.2543783	0.52543477
20191122_MKY1037_14	2.4	436.0952381	423.25	201.1212785	0.570955961
20191122_MKY1037_14	2.5	438.5238095	421.7285714	201.1843257	0.617717076
20191122_MKY1037_14	2.6	438.6190476	423.2642857	201.0976357	0.599753613
20191122_MKY1037_14	2.7	438.2380952	421.85	201.2140981	0.612927718
20191122_MKY1037_14	2.8	438.3809524	423.9571429	201.265324	0.588670589
20191122_MKY1037_14	2.9	441	423.7142857	201.3204904	0.621728567
20191122_MKY1037_14	3	438.1428571	425.7928571	201.1996497	0.563710249
20191122_MKY1037_14	3.1	437.0952381	424.4714286	201.2977233	0.567733324
20191122_MKY1037_14	3.2	436.5238095	421.7571429	201.293345	0.594309103
20191122_MKY1037_14	3.3	438.952381	422.6928571	201.2206655	0.610730723
20191122_MKY1037_14	3.4	441.5714286	422.8357143	201.2478109	0.639147176
20191122_MKY1037_14	3.5	446.952381	421.7071429	201.3134851	0.715682086
20191122_MKY1037_14	3.6	445.952381	422.4928571	201.3787215	0.694122468
20191122_MKY1037_14	3.7	447.8571429	423.0785714	201.232049	0.70840035
20191122_MKY1037_14	3.8	453.8571429	423.8214286	201.2272329	0.767707382
20191122_MKY1037_14	3.9	453.4761905	421.55	201.2123468	0.793126632
20191122_MKY1037_14	4	447.5238095	419.9214286	201.2670753	0.745514647
20191122_MKY1037_14	4.1	454.0952381	423.4	201.2408056	0.775956698
20191122_MKY1037_14	4.2	453.952381	422.5142857	201.2723292	0.785986015
20191122_MKY1037_14	4.3	446.8095238	420.7642857	201.349387	0.726289436
20191122_MKY1037_14	4.4	446.047619	420.5	201.3515762	0.720863678
20191122_MKY1037_14	4.5	447.7619048	421.2142857	201.1742557	0.731254729
20191122_MKY1037_14	4.6	447.7619048	421.4928571	201.2438704	0.7277353
20191122_MKY1037_14	4.7	450.5714286	419.4357143	201.2088441	0.787459972
20191122_MKY1037_14	4.8	449.2857143	419.7428571	201.3795972	0.768619354
20191122_MKY1037_14	4.9	447.5238095	421.0928571	201.4535902	0.730461077
20191122_MKY1037_14	5	449.2380952	419.1	201.2482487	0.776401868
20191122_MKY1037_14	5.1	447.6190476	420.5285714	201.3752189	0.738820944
20191122_MKY1037_14	5.2	447.1904762	418.1357143	201.2381786	0.765210101
20191122_MKY1037_14	5.3	445.1428571	415.5785714	201.2154116	0.775316388
20191122_MKY1037_14	5.4	454.2857143	419.0142857	201.306042	0.836800257
20191122_MKY1037_14	5.5	447.9047619	418.6928571	201.1212785	0.765994122
20191122_MKY1037_14	5.6	449.047619	415.8785714	201.2723292	0.81777841
20191122_MKY1037_14	5.7	450.8095238	416.8071429	201.2591944	0.825920453
20191122_MKY1037_14	5.8	442.5238095	415.2357143	201.2841506	0.748846673
20191122_MKY1037_14	5.9	443.6666667	415.8642857	201.2381786	0.753938123
20191122_MKY1037_14	6	445.8095238	415.3214286	201.2469352	0.786802312
20191122_MKY1037_14	6.1	443.7619048	414.75	201.1370403	0.769953959
20191122_MKY1037_14	6.2	444.6666667	416.3714286	201.2657618	0.75904768
20191122_MKY1037_14	6.3	445.5238095	416.6642857	201.1457968	0.76508571
20191122_MKY1037_14	6.4	440.8095238	416.5357143	201.237303	0.711086109
20191122_MKY1037_14	6.5	440.3333333	416.2714286	201.2955342	0.709002496
20191122_MKY1037_14	6.6	440.5714286	415.7857143	201.2539405	0.718202836
20191122_MKY1037_14	6.7	440.3333333	414.0142857	201.2657618	0.739064412
20191122_MKY1037_14	6.8	441.3809524	412.2928571	201.2101576	0.775029168
20191122_MKY1037_14	6.9	441.2857143	414.05	201.2250438	0.74994144
20191122_MKY1037_14	7	439.4761905	413.95	201.2837128	0.729673409
20191122_MKY1037_14	7.1	439.7142857	411.8714286	201.1383538	0.760534544
20191122_MKY1037_14	7.2	446	411.0357143	201.3012259	0.848780353
20191122_MKY1037_14	7.3	452.4761905	414.85	201.1536778	0.872678786
20191122_MKY1037_14	7.4	448.2380952	411.7642857	201.2565674	0.865515546
20191122_MKY1037_14	7.5	449.1904762	412.5357143	201.1860771	0.865939032
20191122_MKY1037_14	7.6	447	412.2714286	201.2259194	0.843287937
20191122_MKY1037_14	7.7	447.8095238	413.05	201.2885289	0.842241265
20191122_MKY1037_14	7.8	445.8095238	412.3285714	201.2289842	0.82809976
20191122_MKY1037_14	7.9	446	412.1285714	201.3156743	0.83337643
20191122_MKY1037_14	8	444.8571429	412.0357143	201.3222417	0.82085473
20191122_MKY1037_14	8.1	445.952381	409.6428571	201.1830123	0.867847877
20191122_MKY1037_14	8.2	445.5238095	410.4857143	201.2661997	0.850727581
20191122_MKY1037_14	8.3	446.0952381	411.4	201.2342382	0.844640875
20191122_MKY1037_14	8.4	449.047619	412.1714286	201.1900175	0.869389419
20191122_MKY1037_14	8.5	454.5238095	412.6285714	201.3082312	0.929278542
20191122_MKY1037_14	8.6	457.5714286	411.1285714	201.3003503	0.988178403
20191122_MKY1037_14	8.7	449.4761905	411.2857143	201.2180385	0.887293841
20191122_MKY1037_14	8.8	451.4285714	412.2142857	201.4273205	0.89810451
20191122_MKY1037_14	8.9	452.8095238	412.8857143	201.2613835	0.904781282
20191122_MKY1037_14	9	454.5238095	416.8142857	201.308669	0.869893515
20191122_MKY1037_14	9.1	454.7619048	415.7357143	201.2745184	0.887733696
20191122_MKY1037_14	9.2	447.8571429	412.4714286	201.2635727	0.850904337
20191122_MKY1037_14	9.3	450.8095238	412.7	201.3134851	0.883422415
20191122_MKY1037_14	9.4	449	412.8785714	201.2132224	0.858849513
20191122_MKY1037_14	9.5	445.4761905	411.4928571	201.3441331	0.836030933
20191122_MKY1037_14	9.6	448.4761905	413.0142857	201.2683888	0.850736197
20191122_MKY1037_14	9.7	447.4761905	412.2285714	201.2342382	0.849666905
20191122_MKY1037_14	9.8	449.3333333	411.25	201.1646235	0.885953412
20191122_MKY1037_14	9.9	451.6190476	410.6428571	201.2815236	0.922810859
20191122_MKY1037_14	10	450	411.1857143	201.3966725	0.89549738
20191122_MKY1037_14	10.1	445.6666667	410.3214286	201.1935201	0.854662364
20191122_MKY1037_14	10.2	444.2857143	410.6071429	201.2215412	0.833820836
20191122_MKY1037_14	10.3	447.4761905	409.9642857	201.2797723	0.882071379
20191122_MKY1037_14	10.4	446.5238095	409.9714286	201.0783713	0.869892703
20191122_MKY1037_14	10.5	447.5238095	411.0214286	201.3690893	0.86766712
20191122_MKY1037_14	10.6	447.7619048	411.9357143	201.2972855	0.85739595
20191122_MKY1037_14	10.7	445.8095238	412.6714286	201.2710158	0.823385472
20191122_MKY1037_14	10.8	446.952381	411.0642857	201.2254816	0.859802538
20191122_MKY1037_14	10.9	447.7142857	409.1857143	201.3025394	0.896318561
20191122_MKY1037_14	11	453.5714286	410.1071429	201.2605079	0.954440974
20191122_MKY1037_14	11.1	455.952381	410.2071429	201.2228546	0.9819413
20191122_MKY1037_14	11.2	449.047619	409.9928571	201.262697	0.90083208
20191122_MKY1037_14	11.3	452.3809524	409.5714286	201.2771454	0.94782815
20191122_MKY1037_14	11.4	456.4285714	410.6142857	201.2758319	0.981837974
20191122_MKY1037_14	11.5	454	410.2142857	201.3502627	0.958323622
20191122_MKY1037_14	11.6	450.6666667	409.6928571	201.2368651	0.924950705
20191122_MKY1037_14	11.7	444.8571429	410.8928571	201.2635727	0.83682154
20191122_MKY1037_14	11.8	444.3809524	412.1714286	201.2180385	0.813001169
20191122_MKY1037_14	11.9	439.8095238	410.5	201.3467601	0.780974427
20191122_MKY1037_14	12	444.6190476	410.9142857	201.1821366	0.833461323
20191122_MKY1037_14	12.1	444.4761905	409.7428571	201.1571804	0.848297912
20191122_MKY1037_14	12.2	445.3333333	409.3285714	201.2416813	0.864907317
20191122_MKY1037_14	12.3	450.2857143	410.9928571	201.4010508	0.901768
20191122_MKY1037_14	12.4	451.7142857	412.5714286	201.2241681	0.895983651
20191122_MKY1037_14	12.5	452.7619048	412.6071429	201.3025394	0.908298599
20191122_MKY1037_14	12.6	452.4285714	414.1071429	201.4089317	0.883127626
20191122_MKY1037_14	12.7	453.3809524	411.6571429	201.2237303	0.929332004
20191122_MKY1037_14	12.8	455.1428571	411.9	201.1834501	0.947047073
20191122_MKY1037_14	12.9	451.7142857	412.6142857	201.3594571	0.895672769
20191122_MKY1037_14	13	452.2380952	411.2071429	201.2977233	0.922172552
20191122_MKY1037_14	13.1	451.8095238	411.9857143	201.2771454	0.905662429
20191122_MKY1037_14	13.2	453.5238095	409.1642857	201.2929072	0.967921686
20191122_MKY1037_14	13.3	459.047619	409.7928571	201.2845884	1.026165068
20191122_MKY1037_14	13.4	457.5714286	409.3214286	201.1519264	1.014829964
20191122_MKY1037_14	13.5	455.3333333	409.7071429	201.1401051	0.981602235
20191122_MKY1037_14	13.6	450.8095238	409.2285714	201.1856392	0.933393187
20191122_MKY1037_14	13.7	452.5714286	410	201.2902802	0.943873338
20191122_MKY1037_14	13.8	455.8095238	410.45	201.1856392	0.97649055
20191122_MKY1037_14	13.9	451.4285714	408.5214286	201.2123468	0.951521961
20191122_MKY1037_14	14	454.1904762	409.9357143	201.1112084	0.964156238
20191122_MKY1037_14	14.1	453.2857143	408.9357143	201.2762697	0.968360392
20191122_MKY1037_14	14.2	453.8095238	408	201.1589317	0.988521794
20191122_MKY1037_14	14.3	451.4761905	405.35	201.1549912	0.999802085
20191122_MKY1037_14	14.4	448.4285714	406.45	201.2110333	0.945304183
20191122_MKY1037_14	14.5	444.4285714	404.5785714	201.2127846	0.92340381
20191122_MKY1037_14	14.6	451.5238095	406.3071429	201.2237303	0.985988763
20191122_MKY1037_14	14.7	449.4285714	405.7214286	201.1795096	0.968646761
20191122_MKY1037_14	14.8	451.2380952	404.8571429	201.1983363	1.004511614
20191122_MKY1037_14	14.9	451.8095238	404.5714286	201.3139229	1.016419397
20191122_MKY1037_14	15	454.1904762	407.3285714	201.1510508	1.003364898
20191122_MKY1037_14	15.1	454.047619	405.2714286	201.2289842	1.033372855
20191122_MKY1037_14	15.2	453.5714286	407.4642857	201.1405429	0.993619502
20191122_MKY1037_14	15.3	446.2857143	404.3428571	201.1541156	0.950121839
20191122_MKY1037_14	15.4	445.9047619	404.1357143	201.0499124	0.948204996
20191122_MKY1037_14	15.5	454.4761905	408.1	201.1685639	0.995262563
20191122_MKY1037_14	15.6	448.3809524	405.8071429	201.17338	0.954270006
20191122_MKY1037_14	15.7	446.8571429	406.8285714	201.2491243	0.920236241
20191122_MKY1037_14	15.8	449.7619048	408.3	201.1637478	0.934159022
20191122_MKY1037_14	15.9	449.2857143	406.8428571	201.1865149	0.950005583
20191122_MKY1037_14	16	455.0952381	407.2428571	201.1900175	1.01598146
20191122_MKY1037_14	16.1	454.8571429	408.4142857	201.232049	0.995391374
20191122_MKY1037_14	16.2	456.2857143	406.3357143	201.3498249	1.045177063
20191122_MKY1037_14	16.3	453.1428571	405.3571429	201.2237303	1.020720072
20191122_MKY1037_14	16.4	453.047619	405.4214286	201.1510508	1.01832685
20191122_MKY1037_14	16.5	456	405.6928571	201.0945709	1.050809143
20191122_MKY1037_14	16.6	452.9047619	407.4571429	201.2119089	0.985676922
20191122_MKY1037_14	16.7	448.3333333	404.7142857	201.2263573	0.970366258
20191122_MKY1037_14	16.8	449.6190476	404.6857143	201.2600701	0.987019467
20191122_MKY1037_14	16.9	458.047619	407.4928571	201.1703152	1.048628214
20191122_MKY1037_14	17	455.5238095	405.9142857	201.3204904	1.042122294
20191122_MKY1037_14	17.1	452.4285714	404.05	201.1497373	1.031806122
20191122_MKY1037_14	17.2	455.047619	404.7357143	201.216725	1.054196117
20191122_MKY1037_14	17.3	458.7142857	404.1428571	201.1790718	1.109472565
20191122_MKY1037_14	17.4	457.5238095	404.2285714	201.1873905	1.093172842
20191122_MKY1037_14	17.5	456.8571429	404.1642857	201.1965849	1.085842307
20191122_MKY1037_14	17.6	456.4285714	404.7285714	201.2254816	1.071650344
20191122_MKY1037_14	17.7	455.4761905	405.6428571	201.3375657	1.045791275
20191122_MKY1037_14	17.8	451.6190476	405.3857143	201.3288091	1.001531977
20191122_MKY1037_14	17.9	453.5714286	402.9428571	201.3156743	1.064122238
20191122_MKY1037_14	18	452.5238095	403.1928571	201.1247811	1.046338205
20191122_MKY1037_14	18.1	447.1904762	403.1142857	201.2521891	0.980550217
20191122_MKY1037_15	-1.8	774.9047619	786.6105769	202.0771841	0.934744908
20191122_MKY1037_15	-1.7	773.2380952	774.9663462	201.9304495	0.97720838
20191122_MKY1037_15	-1.6	773.2380952	769.2740385	201.9166667	1.002179345
20191122_MKY1037_15	-1.5	766.0952381	765.8557692	201.971374	0.985797539
20191122_MKY1037_15	-1.4	744.2380952	759.4230769	201.9064886	0.916743666
20191122_MKY1037_15	-1.3	747.7619048	756.0480769	201.8019508	0.947415495
20191122_MKY1037_15	-1.2	753.1428571	756.6634615	201.9268448	0.968894188
20191122_MKY1037_15	-1.1	754.4285714	756.125	201.7251908	0.977098585
20191122_MKY1037_15	-1	761.9047619	758.4615385	201.8341815	1.000179713
20191122_MKY1037_15	-0.9	760.1428571	757.2259615	201.8481764	0.997848646
20191122_MKY1037_15	-0.8	762.9047619	761.4663462	201.8430874	0.99115392
20191122_MKY1037_15	-0.7	764.5714286	758.4759615	201.8430874	1.012074352
20191122_MKY1037_15	-0.6	761.8571429	757.4759615	201.8121289	1.004420383
20191122_MKY1037_15	-0.5	766.952381	755.5961538	201.8435115	1.035932732
20191122_MKY1037_15	-0.4	747.6190476	751.5144231	201.8182782	0.967046928
20191122_MKY1037_15	-0.3	751.5714286	750.1875	201.7582697	0.991036869
20191122_MKY1037_15	0	399.7142857	528.7019231	201.7078032	0
20191122_MKY1037_15	0.1	397.2380952	523.25	201.6526718	0.006573948
20191122_MKY1037_15	0.2	403	524.2692308	201.7413062	0.046104897
[truncated: 773 more rows]
