# Supplementary material for: Condensation of Ede1 promotes the initiation of endocytosis
Source: eLife. 2022 Apr 12;11:e72865. doi: 10.7554/eLife.72865 (PMC9064294; doi:10.7554/eLife.72865)
Supplement: Figure 4—source data 1. [file elife-72865-fig4-data1.csv]

target	dataset	condensates_colocalizing	condensates_total	fraction
Syp1	1	54	56	0.9643
Syp1	2	73	73	1
Syp1	3	79	79	1
Ent1	1	53	56	0.9464
Ent1	2	49	49	1
Ent1	3	53	57	0.9298
Sla2	1	62	62	1
Sla2	2	39	39	1
Sla2	3	69	70	0.9857
End3	1	63	63	1
End3	2	51	51	1
End3	3	55	56	0.9821
Pan1	1	66	68	0.9706
Pan1	2	38	40	0.95
Pan1	3	37	37	1
Sla1	1	62	66	0.9394
Sla1	2	43	46	0.9348
Sla1	3	47	50	0.94
Las17	1	53	54	0.9815
Las17	2	49	55	0.8909
Las17	3	57	61	0.9344
Myo5	1	20	52	0.3846
Myo5	2	23	48	0.4792
Myo5	3	14	36	0.3889
Abp1	1	26	98	0.2653
Abp1	2	8	71	0.1127
Abp1	3	9	40	0.225
Rvs167	1	4	57	0.0702
Rvs167	2	11	70	0.1571
Rvs167	3	3	51	0.0588
