# Supplementary material for: Condensation of Ede1 promotes the initiation of endocytosis
Source: eLife. 2022 Apr 12;11:e72865. doi: 10.7554/eLife.72865 (PMC9064294; doi:10.7554/eLife.72865)
Supplement: Figure 5—source data 1. [file elife-72865-fig5-data1.csv]

bg	Ede1	dataset	cells_condensates	cells_total	fraction
wt	FL	1	0	37	0
wt	FL	2	2	55	0.0364
wt	FL	3	1	52	0.0192
wt	1-900	1	0	68	0
wt	1-900	2	0	63	0
wt	1-900	3	5	65	0.0769
wt	1-590	1	0	65	0
wt	1-590	2	0	53	0
wt	1-590	3	0	66	0
wt	366-1381	1	16	60	0.2667
wt	366-1381	2	10	50	0.2
wt	366-1381	3	9	55	0.1636
wt	591-1381	1	0	59	0
wt	591-1381	2	0	52	0
wt	591-1381	3	0	57	0
wt	366-900	1	35	78	0.4487
wt	366-900	2	15	64	0.2344
wt	366-900	3	28	53	0.5283
wt	591-900	1	0	62	0
wt	591-900	2	0	53	0
wt	591-900	3	0	54	0
3×ΔEA	FL	1	42	42	1
3×ΔEA	FL	2	33	38	0.8684
3×ΔEA	FL	3	46	49	0.9388
3×ΔEA	1-900	1	35	71	0.493
3×ΔEA	1-900	2	33	51	0.6471
3×ΔEA	1-900	3	35	51	0.6863
3×ΔEA	1-590	1	0	65	0
3×ΔEA	1-590	2	1	50	0.02
3×ΔEA	1-590	3	0	50	0
3×ΔEA	366-1381	1	42	61	0.6885
3×ΔEA	366-1381	2	33	55	0.6
3×ΔEA	366-1381	3	29	52	0.5577
3×ΔEA	591-1381	1	1	62	0.0161
3×ΔEA	591-1381	2	0	43	0
3×ΔEA	591-1381	3	0	47	0
3×ΔEA	366-900	1	45	50	0.9
3×ΔEA	366-900	2	35	42	0.8333
3×ΔEA	366-900	3	35	46	0.7609
3×ΔEA	591-900	1	1	57	0.0175
3×ΔEA	591-900	2	0	40	0
3×ΔEA	591-900	3	0	42	0
