# Supplementary material for: Condensation of Ede1 promotes the initiation of endocytosis
Source: eLife. 2022 Apr 12;11:e72865. doi: 10.7554/eLife.72865 (PMC9064294; doi:10.7554/eLife.72865)
Supplement: Figure 9—source data 1. [file elife-72865-fig9-data1.csv]

strain	stack	cell	promoter	localization	mean_intensity
MKY4024	1	Cell01	CYC1	diffuse	11
MKY4024	1	Cell02	CYC1	no signal	5
MKY4024	1	Cell03	CYC1	diffuse	5
MKY4024	1	Cell04	CYC1	diffuse	6
MKY4024	1	Cell05	CYC1	diffuse	8
MKY4024	1	Cell06	CYC1	diffuse	6
MKY4024	2	Cell01	CYC1	diffuse	4
MKY4024	2	Cell02	CYC1	diffuse	4
MKY4024	2	Cell03	CYC1	diffuse	9
MKY4024	2	Cell04	CYC1	diffuse	5
MKY4024	3	Cell01	CYC1	diffuse	5
MKY4024	3	Cell02	CYC1	diffuse	5
MKY4024	3	Cell03	CYC1	diffuse	5
MKY4024	3	Cell04	CYC1	diffuse	5
MKY4024	3	Cell05	CYC1	diffuse	4
MKY4024	3	Cell06	CYC1	diffuse	5
MKY4024	3	Cell07	CYC1	punctate	5
MKY4024	3	Cell08	CYC1	diffuse	4
MKY4024	3	Cell09	CYC1	no signal	4
MKY4024	4	Cell01	CYC1	diffuse	5
MKY4024	4	Cell02	CYC1	diffuse	4
MKY4024	4	Cell03	CYC1	diffuse	5
MKY4024	4	Cell04	CYC1	diffuse	6
MKY4024	4	Cell05	CYC1	diffuse	4
MKY4024	4	Cell06	CYC1	diffuse	7
MKY4024	5	Cell01	CYC1	diffuse	5
MKY4024	5	Cell02	CYC1	diffuse	3
MKY4024	5	Cell03	CYC1	diffuse	5
MKY4024	5	Cell04	CYC1	diffuse	3
MKY4024	5	Cell05	CYC1	diffuse	4
MKY4024	5	Cell06	CYC1	diffuse	4
MKY4024	5	Cell07	CYC1	diffuse	5
MKY4024	6	Cell01	CYC1	diffuse	5
MKY4024	6	Cell02	CYC1	diffuse	11
MKY4024	6	Cell03	CYC1	diffuse	5
MKY4024	6	Cell04	CYC1	diffuse	4
MKY4024	6	Cell05	CYC1	diffuse	7
MKY4024	6	Cell06	CYC1	diffuse	4
MKY4024	7	Cell01	CYC1	diffuse	6
MKY4024	7	Cell02	CYC1	diffuse	4
MKY4024	7	Cell03	CYC1	diffuse	5
MKY4024	7	Cell04	CYC1	diffuse	3
MKY4024	7	Cell05	CYC1	diffuse	5
MKY4024	7	Cell06	CYC1	no signal	3
MKY4025	1	Cell01	ADH1	diffuse	7
MKY4025	1	Cell02	ADH1	punctate	127
MKY4025	1	Cell03	ADH1	punctate	123
MKY4025	1	Cell04	ADH1	punctate	234
MKY4025	1	Cell05	ADH1	diffuse	15
MKY4025	2	Cell01	ADH1	punctate	108
MKY4025	2	Cell02	ADH1	diffuse	21
MKY4025	2	Cell03	ADH1	punctate	313
MKY4025	2	Cell04	ADH1	punctate	169
MKY4025	2	Cell05	ADH1	diffuse	34
MKY4025	2	Cell06	ADH1	punctate	64
MKY4025	3	Cell01	ADH1	punctate	9
MKY4025	3	Cell02	ADH1	no signal	3
MKY4025	3	Cell03	ADH1	punctate	10
MKY4025	3	Cell04	ADH1	punctate	9
MKY4025	3	Cell05	ADH1	diffuse	7
MKY4025	3	Cell06	ADH1	punctate	18
MKY4025	4	Cell01	ADH1	diffuse	9
MKY4025	4	Cell02	ADH1	punctate	13
MKY4025	4	Cell03	ADH1	punctate	17
MKY4025	4	Cell04	ADH1	diffuse	6
MKY4025	4	Cell05	ADH1	punctate	21
MKY4025	4	Cell06	ADH1	punctate	16
MKY4025	4	Cell07	ADH1	no signal	3
MKY4025	4	Cell08	ADH1	punctate	34
MKY4025	5	Cell01	ADH1	punctate	13
MKY4025	5	Cell02	ADH1	no signal	3
MKY4025	5	Cell03	ADH1	diffuse	10
MKY4025	5	Cell04	ADH1	no signal	3
MKY4025	5	Cell05	ADH1	punctate	10
MKY4025	5	Cell06	ADH1	punctate	31
MKY4025	6	Cell01	ADH1	punctate	16
MKY4025	6	Cell02	ADH1	diffuse	9
MKY4025	6	Cell03	ADH1	punctate	11
MKY4025	6	Cell04	ADH1	diffuse	5
MKY4025	6	Cell05	ADH1	no signal	3
MKY4025	6	Cell06	ADH1	diffuse	16
MKY4025	6	Cell07	ADH1	no signal	3
MKY4025	6	Cell08	ADH1	diffuse	6
MKY4025	6	Cell09	ADH1	punctate	73
MKY4025	7	Cell01	ADH1	diffuse	9
MKY4025	7	Cell02	ADH1	punctate	10
MKY4025	7	Cell03	ADH1	punctate	13
MKY4025	7	Cell04	ADH1	punctate	46
MKY4025	7	Cell05	ADH1	punctate	17
MKY4025	8	Cell01	ADH1	punctate	9
MKY4025	8	Cell02	ADH1	diffuse	6
MKY4025	8	Cell03	ADH1	diffuse	6
MKY4025	8	Cell04	ADH1	networked	36
MKY4025	8	Cell06	ADH1	punctate	30
MKY4025	8	Cell07	ADH1	punctate	45
MKY4025	8	Cell08	ADH1	punctate	19
MKY4025	9	Cell01	ADH1	diffuse	5
MKY4025	9	Cell02	ADH1	no signal	3
MKY4025	9	Cell03	ADH1	diffuse	5
MKY4025	9	Cell04	ADH1	diffuse	9
MKY4025	9	Cell05	ADH1	punctate	117
MKY4025	10	Cell01	ADH1	punctate	13
MKY4025	10	Cell02	ADH1	diffuse	3
MKY4025	10	Cell03	ADH1	diffuse	8
MKY4025	10	Cell04	ADH1	punctate	10
MKY4025	10	Cell05	ADH1	punctate	11
MKY4025	10	Cell06	ADH1	punctate	10
MKY4026	1	Cell01	TEF1	punctate	21
MKY4026	1	Cell02	TEF1	punctate	16
MKY4026	1	Cell03	TEF1	punctate	66
MKY4026	1	Cell04	TEF1	punctate	16
MKY4026	2	Cell01	TEF1	punctate	21
MKY4026	2	Cell02	TEF1	punctate	12
MKY4026	2	Cell03	TEF1	punctate	20
MKY4026	2	Cell04	TEF1	punctate	47
MKY4026	2	Cell05	TEF1	diffuse	7
MKY4026	2	Cell06	TEF1	punctate	14
MKY4026	2	Cell07	TEF1	punctate	10
MKY4026	2	Cell08	TEF1	punctate	10
MKY4026	2	Cell09	TEF1	punctate	193
MKY4026	3	Cell01	TEF1	punctate	14
MKY4026	3	Cell02	TEF1	punctate	68
MKY4026	3	Cell03	TEF1	punctate	12
MKY4026	3	Cell04	TEF1	punctate	18
MKY4026	3	Cell05	TEF1	punctate	16
MKY4026	3	Cell06	TEF1	no signal	6
MKY4026	3	Cell07	TEF1	punctate	26
MKY4026	3	Cell08	TEF1	punctate	33
MKY4026	3	Cell09	TEF1	punctate	17
MKY4026	4	Cell01	TEF1	no signal	3
MKY4026	4	Cell02	TEF1	punctate	9
MKY4026	4	Cell03	TEF1	punctate	15
MKY4026	4	Cell40	TEF1	no signal	3
MKY4026	5	Cell01	TEF1	punctate	26
MKY4026	5	Cell02	TEF1	punctate	10
MKY4026	5	Cell03	TEF1	punctate	14
MKY4026	5	Cell04	TEF1	punctate	46
MKY4026	5	Cell05	TEF1	punctate	10
MKY4026	5	Cell06	TEF1	punctate	26
MKY4026	5	Cell07	TEF1	punctate	13
MKY4026	5	Cell08	TEF1	diffuse	11
MKY4026	5	Cell09	TEF1	punctate	17
MKY4026	5	Cell10	TEF1	punctate	9
MKY4026	6	Cell01	TEF1	no signal	4
MKY4026	6	Cell02	TEF1	punctate	42
MKY4026	6	Cell03	TEF1	networked	112
MKY4026	6	Cell04	TEF1	punctate	9
MKY4026	6	Cell05	TEF1	punctate	20
MKY4026	6	Cell06	TEF1	no signal	3
MKY4026	7	Cell01	TEF1	punctate	26
MKY4026	7	Cell02	TEF1	no signal	3
MKY4026	7	Cell03	TEF1	no signal	3
MKY4026	7	Cell04	TEF1	punctate	24
MKY4027	1	Cell01	TDH3	punctate	31
MKY4027	1	Cell02	TDH3	networked	236
MKY4027	1	Cell03	TDH3	networked	250
MKY4027	1	Cell04	TDH3	networked	277
MKY4027	2	Cell01	TDH3	networked	46
MKY4027	2	Cell02	TDH3	punctate	17
MKY4027	2	Cell03	TDH3	no signal	3
MKY4027	2	Cell05	TDH3	networked	67
MKY4027	2	Cell06	TDH3	punctate	9
MKY4027	3	Cell01	TDH3	punctate	34
MKY4027	3	Cell02	TDH3	networked	51
MKY4027	3	Cell03	TDH3	punctate	54
MKY4027	3	Cell04	TDH3	no signal	4
MKY4027	3	Cell05	TDH3	networked	105
MKY4027	3	Cell06	TDH3	diffuse	5
MKY4027	4	Cell01	TDH3	networked	136
MKY4027	4	Cell02	TDH3	diffuse	3
MKY4027	4	Cell03	TDH3	networked	80
MKY4027	4	Cell04	TDH3	punctate	17
MKY4027	4	Cell05	TDH3	punctate	26
MKY4027	5	Cell01	TDH3	networked	130
MKY4027	5	Cell02	TDH3	punctate	33
MKY4027	5	Cell03	TDH3	punctate	24
MKY4027	5	Cell04	TDH3	punctate	44
MKY4027	5	Cell05	TDH3	diffuse	3
MKY4027	5	Cell06	TDH3	networked	64
MKY4027	5	Cell07	TDH3	networked	70
MKY4027	6	Cell01	TDH3	punctate	34
MKY4027	6	Cell02	TDH3	diffuse	5
MKY4027	6	Cell03	TDH3	networked	91
MKY4027	6	Cell04	TDH3	networked	177
MKY4027	6	Cell05	TDH3	punctate	34
MKY4027	7	Cell01	TDH3	punctate	33
MKY4027	7	Cell02	TDH3	networked	130
MKY4027	7	Cell03	TDH3	networked	82
MKY4027	7	Cell04	TDH3	diffuse	14
MKY4027	7	Cell05	TDH3	networked	89
MKY4027	7	Cell06	TDH3	networked	176
MKY4027	7	Cell07	TDH3	punctate	37
