# Supplementary material for: Condensation of Ede1 promotes the initiation of endocytosis
Source: eLife journal article supplement (doi:10.7554/elife.72865), 2022-04-12

**A**

*ede1<sup>Δ366-900</sup>-mCherry-FKBP*  
*SYP1-FRB, tor1-1, fpr1Δ*

-rapamycin

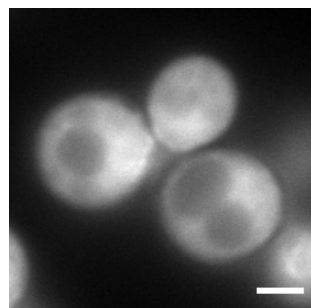

+rapamycin

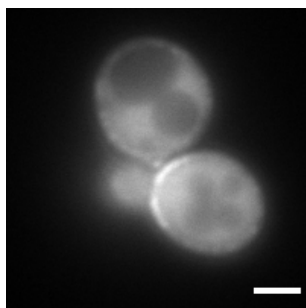**B**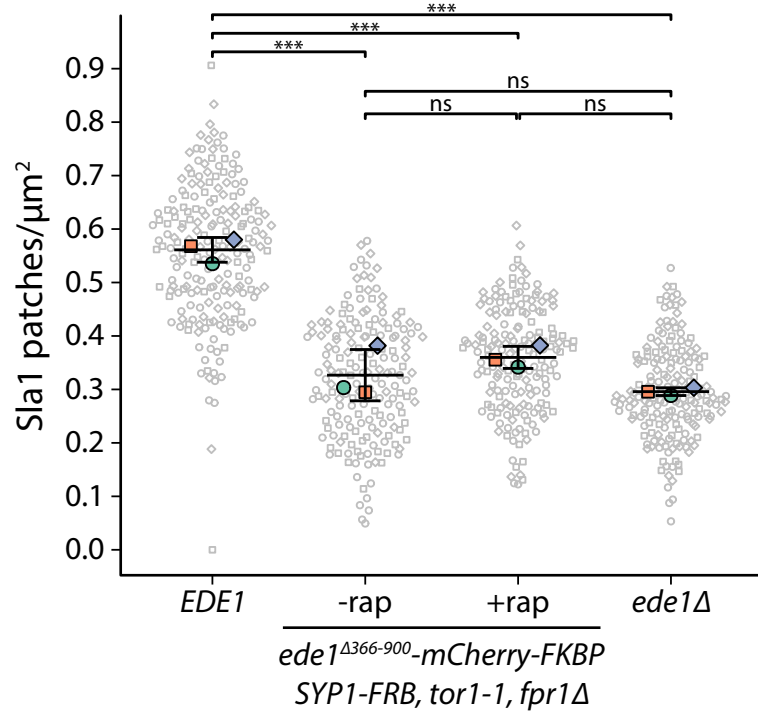**C**

*ede1<sup>Δ366-900</sup>-mCherry-FKBP*  
*SLA2-FRB, tor1-1, fpr1Δ*

-rapamycin

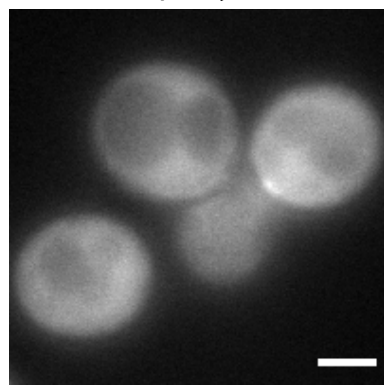

+rapamycin

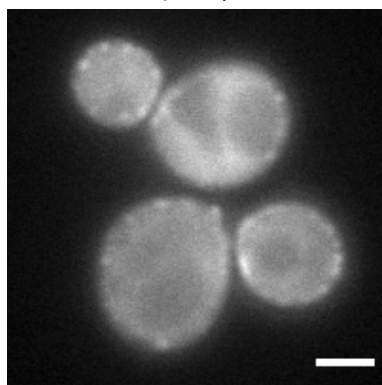**D**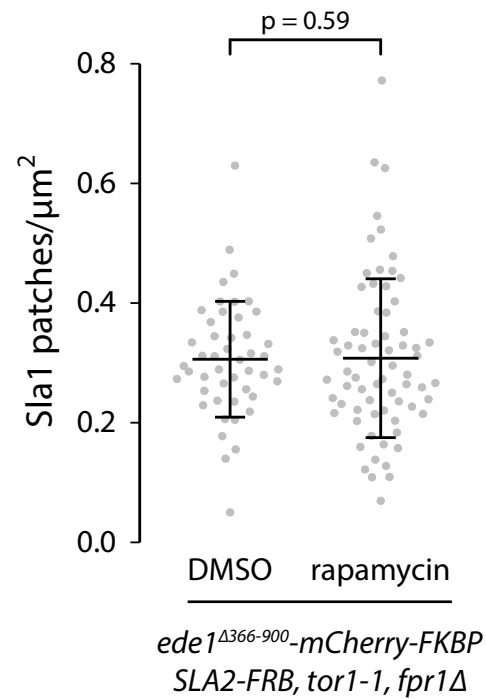

Supplement: supp [file elife_poa_e72865_Figure_6_figure_supplement_1.pdf › elife_poa_e72865_Figure_6_figure_supplement_1.pdf]
