# Supplementary material for: Condensation of Ede1 promotes the initiation of endocytosis
Source: eLife journal article supplement (doi:10.7554/elife.72865), 2022-04-12

**A** GFP-2×PH(PLC $\delta$ )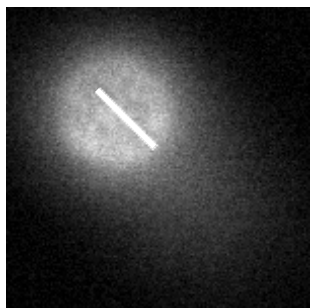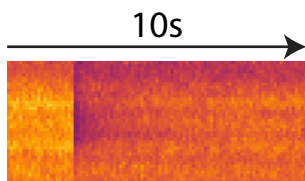GFP-Ede1<sup>366-900</sup>-2×PH(PLC $\delta$ )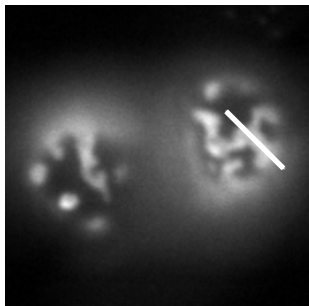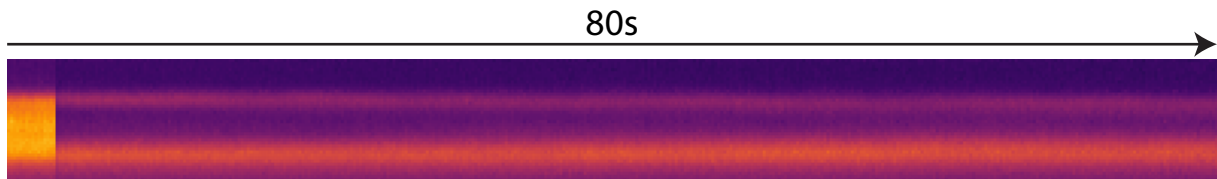**B**GFP-Ede1<sup>366-900</sup>-2×PH

0% HD

10% HD

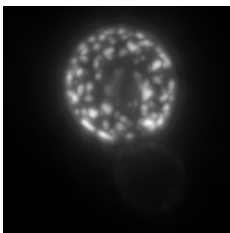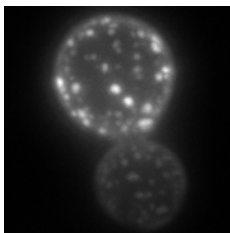

GFP-2×PH

0% HD

10% HD

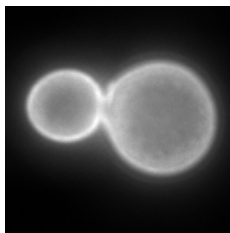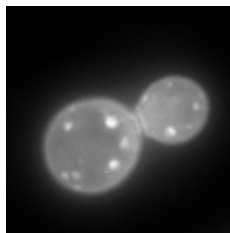GFP-Ede1<sup>366-900</sup>

0% HD

10% HD

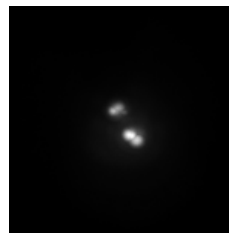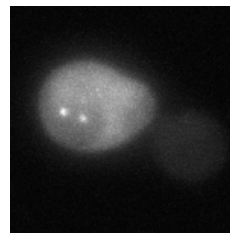

Supplement: supp [file elife_poa_e72865_Figure_9_figure_supplement_1.pdf › elife_poa_e72865_Figure_9_figure_supplement_1.pdf]
