# Supplementary material for: Condensation of Ede1 promotes the initiation of endocytosis
Source: eLife. 2022 Apr 12;11:e72865. doi: 10.7554/eLife.72865 (PMC9064294; doi:10.7554/eLife.72865)
Supplement: Supplementary file 1. [file elife-72865-supp1.xlsx]

## Sheet: Strains
Appears in figures	Strain	Genotype
parental strain background	MKY0100	MATa, his3Δ200, leu2-3,112, ura3-52, lys2-801
parental strain background	MKY0102	MATα, his3Δ200, leu2-3,112, ura3-52, lys2-801
1	MKY3563	MATa/MATα, his3Δ200/his3Δ200, leu2-3,112/leu2-3,112, ura3-52/ura3-52, lys2-801/lys2-801, yap1801Δ::natNT2/yap1801Δ::natNT2, yap1802Δ::natNT2/yap1802Δ::natNT2, apl3Δ::natNT2/apl3Δ::natNT2, EDE1-EGFP::HIS3MX6/EDE1-EGFP::HIS3MX6
1	MKY3564	MATa/MATα, his3Δ200/his3Δ200, leu2-3,112/leu2-3,112, ura3-52/ura3-52, lys2-801/lys2-801, yap1801Δ::natNT2/yap1801Δ::natNT2, yap1802Δ::natNT2/yap1802Δ::natNT2, apl3Δ::natNT2/apl3Δ::natNT2, EDE1-EGFP::HIS3MX6/ede1Δ::klURA3
1	MKY3569	MATa/MATα, his3Δ200/his3Δ200, leu2-3,112/leu2-3,112, ura3-52/ura3-52, lys2-801/lys2-801, yap1801Δ::natNT2/yap1801Δ::natNT2, yap1802Δ::natNT2/yap1802Δ::natNT2, apl3Δ::natNT2/apl3Δ::natNT2, EDE1-EGFP::HIS3MX6/EDE1
1	MKY4242	MATα, his3∆200, leu2-3,112, ura3-52, lys2-801, yap1801::natNT2, yap1802::natNT2, apl3::natNT2, EDE1-mNeonGreen::HIS3MX6
1	MKY4243	MATα, his3∆200, leu2-3,112, ura3-52, lys2-801, yap1801::natNT2, yap1802::natNT2, apl3::natNT2, EDE1-msGFP2::HIS3MX6
1	MKY4244	MATα, his3∆200, leu2-3,112, ura3-52, lys2-801, yap1801::natNT2, yap1802::natNT2, apl3::natNT2, EDE1-mCherry::kanMX4
1, 2	MKY1037	MATa, his3Δ200, leu2-3,112, ura3-52, lys2-801, natNT2::ADH1pr-yeGFP-EDE1
1, 2, 3	MKY0381	MATa, his3Δ200, leu2-3,112, ura3-52, lys2-801, EDE1-EGFP::HIS3MX6, ABP1-mCherry::KANMX4
1, 2, 5	MKY0532	MATa, his3Δ200, leu2-3,112, ura3-52, lys2-801, yap1801Δ::natNT2, yap1802Δ::natNT2, apl3Δ::natNT2, EDE1-EGFP::HIS3MX6
1, 3, 4	MKY0583	MATa, his3Δ200, leu2-3,112, ura3-52, lys2-801, yap1801Δ::natNT2, yap1802Δ::natNT2, apl3Δ::natNT2, EDE1-EGFP::HIS3MX6, ABP1-mCherry::KANMX4
1, 5	MKY0172	MATa, his3Δ200, leu2-3,112, ura3-52, lys2-801, EDE1-EGFP::HIS3MX6
2, 4	MKY0578	MATa, his3Δ200, leu2-3,112, ura3-52, lys2-801, yap1801Δ::natNT2, yap1802Δ::natNT2, apl3Δ::natNT2, EDE1-EGFP::HIS3MX6, SLA1-mCherry::KANMX4
3	MKY0379	MATa, his3Δ200, leu2-3,112, ura3-52, lys2-801, EDE1-EGFP::HIS3MX6, SLA1-mCherry::KANMX4
3	MKY3448	MATa, his3∆200, leu2-3,112, ura3-52, lys2-801, ADH::yeGFP-EDE1::natNT2, ABP1-mCherry::KANMX4
3	MKY3488	MATa, his3∆200, leu2-3,112, ura3-52, lys2-801, ADH::yeGFP-EDE1::natNT2, RVS167-mCherry::KANMX4
3	MKY4405	MATa, his3∆200, leu2-3,112, ura3-52, lys2-801, natNT2::GALSpr-yeGFP-EDE1
3	MKY4450	MATa, his3∆200, leu2-3,112, ura3-52, lys2-801, EDE1-EGFP::HIS3MX6, RVS167-mCherry::KANMX
3, 4	MKY3487	MATa, his3Δ200, leu2-3,112, ura3-52, lys2-801, yap1801Δ::natNT2, yap1802Δ::natNT2, apl3Δ::natNT2, EDE1-EGFP::HIS3MX6, RVS167-mCherry::KANMX4
4	MKY3454	MATa, his3Δ200, leu2-3,112, ura3-52, lys2-801, yap1801Δ::natNT2, yap1802Δ::natNT2, apl3Δ::natNT2, EDE1-EGFP::HIS3MX6, ENT1-mCherry::KANMX4
4	MKY3471	MATα, his3Δ200, leu2-3,112, ura3-52, lys2-801, yap1801Δ::natNT2, yap1802Δ::natNT2, apl3Δ::natNT2, EDE1-EGFP::HIS3MX6, SYP1-mCherry::KANMX4
4	MKY3472	MATα, his3Δ200, leu2-3,112, ura3-52, lys2-801, yap1801Δ::natNT2, yap1802Δ::natNT2, apl3Δ::natNT2, EDE1-EGFP::HIS3MX6, SLA2-mCherry::KANMX4
4	MKY3483	MATa, his3Δ200, leu2-3,112, ura3-52, lys2-801, yap1801Δ::natNT2, yap1802Δ::natNT2, apl3Δ::natNT2, EDE1-EGFP::HIS3MX6, END3-mCherry::KANMX4
4	MKY3485	MATa, his3Δ200, leu2-3,112, ura3-52, lys2-801, yap1801Δ::natNT2, yap1802Δ::natNT2, apl3Δ::natNT2, EDE1-EGFP::HIS3MX6, LAS17-mCherry::KANMX4
4	MKY3496	MATa, his3Δ200, leu2-3,112, ura3-52, lys2-801, yap1801Δ::natNT2, yap1802Δ::natNT2, apl3Δ::natNT2, EDE1-EGFP::HIS3MX6, PAN1-mCherry::KANMX4
4	MKY3497	MATa, his3Δ200, leu2-3,112, ura3-52, lys2-801, yap1801Δ::natNT2, yap1802Δ::natNT2, apl3Δ::natNT2, EDE1-EGFP::HIS3MX6, MYO5-mCherry::KANMX4
5	MKY3519	MATα, his3Δ200, leu2-3,112, ura3-52, lys2-801, yap1801Δ::natNT2, yap1802Δ::natNT2, apl3Δ::natNT2, ede1(1-590)-EGFP::HIS3MX6
5	MKY3546	MATa, his3Δ200, leu2-3,112, ura3-52, lys2-801, ede1(1-900)-EFGP::HIS3MX6
5	MKY3547	MATα, his3Δ200, leu2-3,112, ura3-52, lys2-801, yap1801Δ::natNT2, yap1802Δ::natNT2, apl3Δ::natNT2, ede1(1-900)-EFGP::HIS3MX6
5	MKY3548	MATa, his3Δ200, leu2-3,112, ura3-52, lys2-801, ede1(366-1381)-EFGP::HIS3MX6
5	MKY3549	MATα, his3Δ200, leu2-3,112, ura3-52, lys2-801, yap1801Δ::natNT2, yap1802Δ::natNT2, apl3Δ::natNT2, ede1(366-1381)-EFGP::HIS3MX6
5	MKY3550	MATa, his3Δ200, leu2-3,112, ura3-52, lys2-801, ede1(591-1381)-EFGP::HIS3MX6
5	MKY3551	MATα, his3Δ200, leu2-3,112, ura3-52, lys2-801, yap1801Δ::natNT2, yap1802Δ::natNT2, apl3Δ::natNT2, ede1(591-1381)-EFGP::HIS3MX6
5	MKY3552	MATa, his3Δ200, leu2-3,112, ura3-52, lys2-801, ede1(366-900)-EFGP::HIS3MX6
5	MKY3553	MATα, his3Δ200, leu2-3,112, ura3-52, lys2-801, yap1801Δ::natNT2, yap1802Δ::natNT2, apl3Δ::natNT2, ede1(366-900)-EFGP::HIS3MX6
5	MKY3554	MATa, his3Δ200, leu2-3,112, ura3-52, lys2-801, ede1(591-900)-EFGP::HIS3MX6
5	MKY3555	MATα, his3Δ200, leu2-3,112, ura3-52, lys2-801, yap1801Δ::natNT2, yap1802Δ::natNT2, apl3Δ::natNT2, ede1(591-900)-EFGP::HIS3MX6
5	MKY4083	MATa, his3Δ200, leu2-3,112, ura3-52, lys2-801, ede1(1-590)-EFGP::HIS3MX6
6	MKY3682	MATa, his3Δ200, leu2-3,112, ura3-52, lys2-801, ede1(Δ366-590)-EGFP::HIS3MX6
6	MKY3685	MATa, his3Δ200, leu2-3,112, ura3-52, lys2-801, ede1(Δ591-900)-EGFP::HIS3MX6
6	MKY3688	MATa, his3Δ200, leu2-3,112, ura3-52, lys2-801, ede1(Δ366-900)-EGFP::HIS3MX6
6	MKY3770	MATa, his3Δ200, leu2-3,112, ura3-52, lys2-801, ede1(Δ366-590), SLA1-EGFP::HIS3MX6
6	MKY3776	MATa, his3Δ200, leu2-3,112, ura3-52, lys2-801, ede1(Δ591-900), SLA1-EGFP::HIS3MX6
6	MKY4343	MATα, his3∆200, leu2-3,112, ura3-52, lys2-801, ede1∆(366-900)-mCherry-(24)-FKBP::natNT2, SYP1-(12)-FRB::hphNT1, SLA1-EGFP::HIS3MX6, fpr1∆::klURA3, tor1-1
6, 8	MKY0140	MATa, his3Δ200, leu2-3,112, ura3-52, lys2-801, SLA1-EGFP::HIS3MX6
6, 8	MKY0654	MATa, his3Δ200, leu2-3,112, ura3-52, lys2-801, ede1Δ::natNT2, SLA1-EGFP::HIS3MX6
6, 8	MKY3782	MATa, his3Δ200, leu2-3,112, ura3-52, lys2-801, ede1(Δ366-900), SLA1-EGFP::HIS3MX6
7	MKY0428	MATa, his3Δ200, leu2-3,112, ura3-52, lys2-801, YAP1802-EGFP::HIS3MX6, SLA1-mCherry::KANMX4
7	MKY1085	MATa, his3Δ200, leu2-3,112, ura3-52, lys2-801, ENT1-EGFP::HIS3MX6, SLA1-mCherry::KANMX4
7	MKY1228	MATα, his3Δ200, leu2-3,112, ura3-52, lys2-801, YAP1802-EGFP::HIS3MX6, SLA1-mCherry::KANMX4, ede1Δ::natNT2
7	MKY1478	MATa, his3Δ200, leu2-3,112, ura3-52, lys2-801, YAP1802-EGFP::HIS3MX6, SLA1-mCherry::KANMX4
7	MKY1537	MATα, his3Δ200, leu2-3,112, ura3-52, lys2-801, APL1-EGFP::HIS3MX6, SLA1-mCherry::KANMX4
7	MKY1538	MATα, his3Δ200, leu2-3,112, ura3-52, lys2-801, APL1-EGFP::HIS3MX6, SLA1-mCherry::KANMX4, ede1Δ::natNT2
7	MKY1541	MATα, his3Δ200, leu2-3,112, ura3-52, lys2-801, ENT1-EGFP::HIS3MX6, SLA1-mCherry::KANMX4, ede1Δ::natNT2
7	MKY1549	MATα, his3Δ200, leu2-3,112, ura3-52, lys2-801, YAP1802-EGFP::HIS3MX6, SLA1-mCherry::KANMX4, ede1Δ::natNT2
7	MKY1738	MATα, his3Δ200, leu2-3,112, ura3-52, lys2-801, SLA2-EGFP::HIS3MX6, SLA1-mCherry::KANMX4
7	MKY1740	MATα, his3Δ200, leu2-3,112, ura3-52, lys2-801, SLA2-EGFP::HIS3MX6, SLA1-mCherry::KANMX4, ede1Δ::natNT2
7	MKY4036	MATα, his3Δ200, leu2-3,112, ura3-52, lys2-801, SYP1-EGFP::HIS3MX6, SLA1-mCherry::KANMX4, ede1(Δ366-590)
7	MKY4037	MATα, his3Δ200, leu2-3,112, ura3-52, lys2-801, SYP1-EGFP::HIS3MX6, SLA1-mCherry::KANMX4, ede1(Δ591-900)
7	MKY4038	MATα, his3Δ200, leu2-3,112, ura3-52, lys2-801, SYP1-EGFP::HIS3MX6, SLA1-mCherry::KANMX4, ede1(Δ366-900)
7	MKY4040	MATα, his3Δ200, leu2-3,112, ura3-52, lys2-801, YAP1802-EGFP::HIS3MX6, SLA1-mCherry::KANMX4, ede1(Δ366-590)
7	MKY4042	MATα, his3Δ200, leu2-3,112, ura3-52, lys2-801, YAP1802-EGFP::HIS3MX6, SLA1-mCherry::KANMX4, ede1(Δ591-900)
7	MKY4043	MATα, his3Δ200, leu2-3,112, ura3-52, lys2-801, YAP1802-EGFP::HIS3MX6, SLA1-mCherry::KANMX4, ede1(Δ366-900)
7	MKY4044	MATa, his3Δ200, leu2-3,112, ura3-52, lys2-801, APL1-EGFP::HIS3MX6, SLA1-mCherry::KANMX4, ede1(Δ366-590)
7	MKY4046	MATa, his3Δ200, leu2-3,112, ura3-52, lys2-801, APL1-EGFP::HIS3MX6, SLA1-mCherry::KANMX4, ede1(Δ591-900)
7	MKY4048	MATa, his3Δ200, leu2-3,112, ura3-52, lys2-801, APL1-EGFP::HIS3MX6, SLA1-mCherry::KANMX4, ede1(Δ366-900)
7	MKY4051	MATα, his3Δ200, leu2-3,112, ura3-52, lys2-801, ENT1-EGFP::HIS3MX6, SLA1-mCherry::KANMX4, ede1(Δ366-590)
7	MKY4053	MATa, his3Δ200, leu2-3,112, ura3-52, lys2-801, ENT1-EGFP::HIS3MX6, SLA1-mCherry::KANMX4, ede1(Δ591-900)
7	MKY4055	MATa, his3Δ200, leu2-3,112, ura3-52, lys2-801, ENT1-EGFP::HIS3MX6, SLA1-mCherry::KANMX4, ede1(Δ366-900)
7	MKY4057	MATa, his3Δ200, leu2-3,112, ura3-52, lys2-801, SLA2-EGFP::natNT2, SLA1-mCherry::KANMX4, ede1(Δ366-590)
7	MKY4059	MATa, his3Δ200, leu2-3,112, ura3-52, lys2-801, SLA2-EGFP::natNT2, SLA1-mCherry::KANMX4, ede1(Δ591-900)
7	MKY4061	MATa, his3Δ200, leu2-3,112, ura3-52, lys2-801, SLA2-EGFP::natNT2, SLA1-mCherry::KANMX4, ede1(Δ366-900)
8	MKY4260	MATα, his3∆200, leu2-3,112, ura3-52, lys2-801, EDE1(366-900)::SNF5(1-332)-msGFP2::HIS3MX6
8	MKY4261	MATα, his3∆200, leu2-3,112, ura3-52, lys2-801, EDE1(366-900)::WHI3(180-532)-msGFP2::HIS3MX6
8	MKY4262	MATα, his3∆200, leu2-3,112, ura3-52, lys2-801, EDE1(366-900)::SUP35(1-253)M3-msGFP2::HIS3MX6
8	MKY4263	MATα, his3∆200, leu2-3,112, ura3-52, lys2-801, EDE1(366-900)::hsFUS(2-214)-msGFP2::HIS3MX6
8	MKY4278	MATa, his3∆200, leu2-3,112, ura3-52, lys2-801, EDE1-msGFP2::HIS3MX6
8	MKY4281	MATa, his3∆200, leu2-3,112, ura3-52, lys2-801, ede1∆(366-900)-msGFP2::HIS3MX6
8	MKY4283	MATα, his3∆200, leu2-3,112, ura3-52, lys2-801, EDE1(366-900)::SNF5(1-332), SLA1-EGFP::HIS3MX6
8	MKY4291	MATa, his3∆200, leu2-3,112, ura3-52, lys2-801, EDE1(366-900)::SUP35(1-253)M3, SLA1-EGFP::HIS3MX6
8	MKY4567	MATa, his3∆200, leu2-3,112, ura3-52, lys2-801, EDE1[(366-900)::dTomato]-msGFP2::HIS3MX6
8	MKY4568	MATa, his3∆200, leu2-3,112, ura3-52, lys2-801, EDE1[(366-900)::KHC(335-931)]-msGFP2::HIS3MX6
8	MKY4569	MATa, his3∆200, leu2-3,112, ura3-52, lys2-801, EDE1[(366-900)::Eg5(358-797)]-msGFP2::HIS3MX6
8	MKY4576	MATa, his3∆200, leu2-3,112, ura3-52, lys2-801, EDE1[(366-900)::dTomato], SLA1-EGFP::HIS3MX6
8	MKY4578	MATa, his3∆200, leu2-3,112, ura3-52, lys2-801, EDE1[(366-900)::KHC(335-931)], SLA1-EGFP::HIS3MX6
8	MKY4580	MATa, his3∆200, leu2-3,112, ura3-52, lys2-801, EDE1[(366-900)::Eg5(358-797)], SLA1-EGFP::HIS3MX6
8	MKY4617	MATa, his3∆200, leu2-3,112, ura3-52, lys2-801, EDE1[(366-900)::mCherry], SLA1-EGFP::HIS3MX6
8	MKY4638	MATa, his3∆200, leu2-3,112, ura3-52, lys2-801, EDE1[(366-900)::mCherry]-msGFP2::HIS3MX6
9	MKY4024	MATa, his3Δ200, leu2-3,112, ura3-52, lys2-801, ede1Δ::natNT2, SLA1-mCherry::kanMX4 with pMK292 [CEN klURA3 CYC1pr-GFP-ede1(366-900)-2xPH(PLCδ)]
9	MKY4025	MATa, his3Δ200, leu2-3,112, ura3-52, lys2-801, ede1Δ::natNT2, SLA1-mCherry::kanMX4 with pMK293 [CEN klURA3 ADH1pr-GFP-ede1(366-900)-2xPH(PLCδ)]
9	MKY4026	MATa, his3Δ200, leu2-3,112, ura3-52, lys2-801, ede1Δ::natNT2, SLA1-mCherry::kanMX4 with pMK294 [CEN klURA3 TEF1pr-GFP-ede1(366-900)-2xPH(PLCδ)]
9	MKY4027	MATa, his3Δ200, leu2-3,112, ura3-52, lys2-801, ede1Δ::natNT2, SLA1-mCherry::kanMX4 with pMK295 [CEN klURA3 TDH3pr-GFP-ede1(366-900)-2xPH(PLCδ)]
9	MKY4028	MATa, his3Δ200, leu2-3,112, ura3-52, lys2-801, ede1Δ::natNT2, SLA1-mCherry::kanMX4 with pMK296 [CEN klURA3 TDH3pr-GFP-2xPH(PLCδ)]
9	MKY4173	MATa, his3Δ200, leu2-3,112, ura3-52, lys2-801, ede1Δ::natNT2, SLA1-mCherry::kanMX4 with pMK318 [CEN klURA3 TDH3pr-GFP-ede1(366-900)]

## Sheet: Plasmids
Replicating plasmids
Name	Replication	Selection	Promoter	Gene
pMK0281	2μ	klURA3		GFP-ede1(366-900)-2×PH(PLCδ)
pMK0292	CEN	klURA3	CYC1	GFP-ede1(366-900)-2×PH(PLCδ)
pMK0293	CEN	klURA3	ADH1	GFP-ede1(366-900)-2×PH(PLCδ)
pMK0294	CEN	klURA3	TEF1	GFP-ede1(366-900)-2×PH(PLCδ)
pMK0295	CEN	klURA3	TDH3	GFP-ede1(366-900)-2×PH(PLCδ)
pMK0296	CEN	klURA3	TDH3	GFP-2×PH(PLCδ)
pMK0318	CEN	klURA3	TDH3	GFP-ede1(366-900)
Cassette plasmids
Name	Alias	Tag	Selection	Origin
pMK0003	pFA6a-EGFP-HIS3MX6	GFP	HIS3MX6	Janke et al., Yeast (2004)
pMK0005	pFA6a-mCherry-kanMX4	mCherry	kanMX4	Janke et al., Yeast (2004)
pMK0019	pFA6a-natNT2	gene deletion	natNT2	Janke et al., Yeast (2004)
pMK0086	pFA6a-klURA3	gene deletion	klURA3	Janke et al., Yeast (2004)
pMK0333	pFA6a-mNeonGreen-HIS3MX6	mNeonGreen	HIS3MX6	this work
pMK0334	pFA6a-msGFP2-HIS3MX6	msGFP2	His3MX6	this work, msGFP2 tag provided by Fernando Valbuena (Valbuena et al., Traffic 2020)
pMK0335	pFA6a-polyGA-mCherry-kanMX4	mCherry	kanMX4	this work

## Sheet: Microscopes
Olympus IX81
Part	Name	Manufacturer
Objective	PlanApo 100x/1.45 TIRFM	Olympus
CCD camera	Orca ER	Hamamatsu
Lamp (Transmission)	IX2-UCB	Olympus
Lamp (Epifluorescence)	X-CITE 120 PC	EXFO
Laser	Sapphire 488-100	Coherent
Laser	Compass 315M (561 nm)	Coherent
Shutter control	LAMBDA 10-3	Sutter Instruments
Shutter control (laser)	Uniblitz VMM-T1	Vincent Associates
Shutter control (laser)	Uniblitz VMM-D3	Vincent Associates
Filter set	U-MGFPHQ	Olympus
Filter set	U-MRFPHQ	Olympus
Temperature control	CherryLoop	Cherry Biotech
Software	MetaMorph	Molecular Devices
Olympus IX83
Part	Name	Manufacturer
Objective	UApo N 150x/1.45 TIRFM	Olympus
EMCCD Camera	ImageEM X2	Hamamatsu
Laser set	VS-LMS 405/488/561/640	Visitron
Filter set	TRF89902 405/488/561/647	Chroma
Laser control	iLas2	Roper Scientific
Beam splitter	Gemini	Hamamatsu
Beam splitter (dichroic)	Di03-R488/561-t1	Semrock
Beam splitter (emission)	FF03-525/50-25	Semrock
Beam splitter (emission)	FF01-630/92-25	Semrock
Software	VisiView	Visitron
