# Supplementary figures and images for: Condensation of Ede1 promotes the initiation of endocytosis
Source: eLife journal article supplement (doi:10.7554/elife.72865), 2022-04-12

$3\times\Delta EA$

Ede1-mNeonGreen

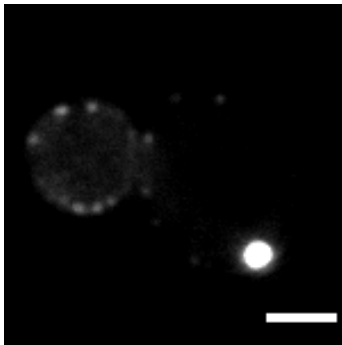

Ede1-msGFP2

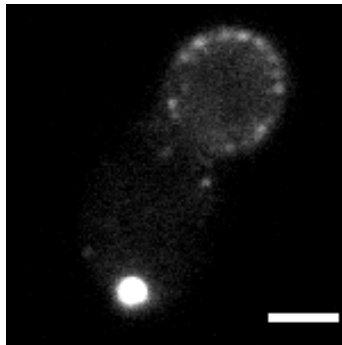

Ede1-mCherry

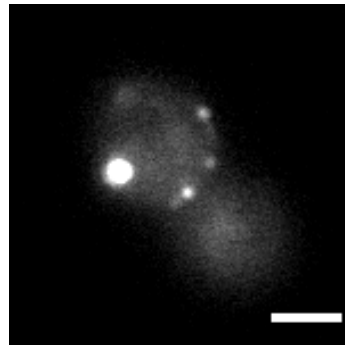

Supplement: supp [file elife_poa_e72865_Figure_1_figure_supplement_1.pdf › elife_poa_e72865_Figure_1_figure_supplement_1.pdf]

EDE1-EGFP

FM4-64

Merge

3×ΔEA

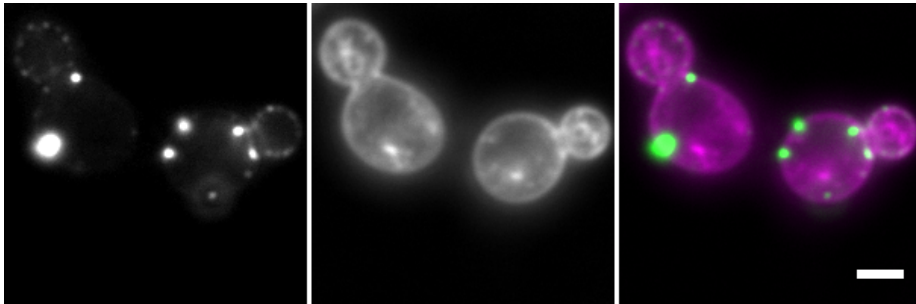

Ede1 overexpression  
(*ADH1* promoter)

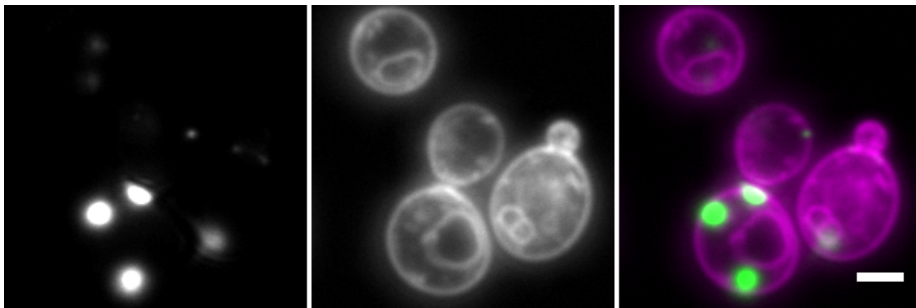

Supplement: supp [file elife_poa_e72865_Figure_4_figure_supplement_1.pdf › elife_poa_e72865_Figure_4_figure_supplement_1.pdf]

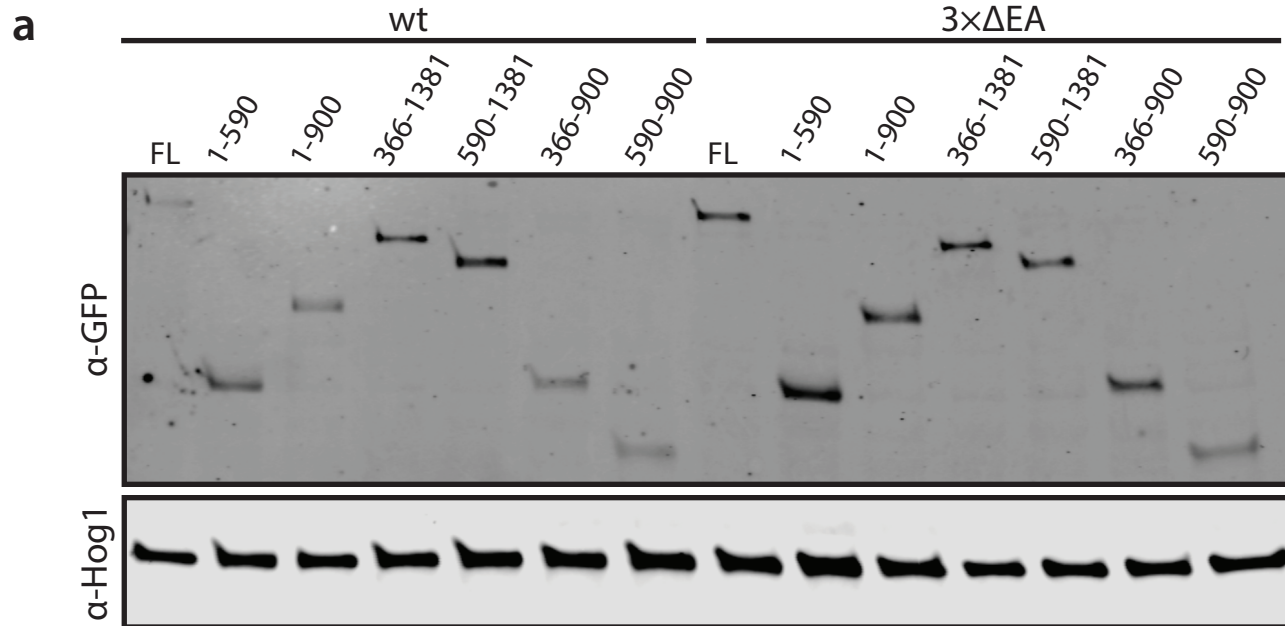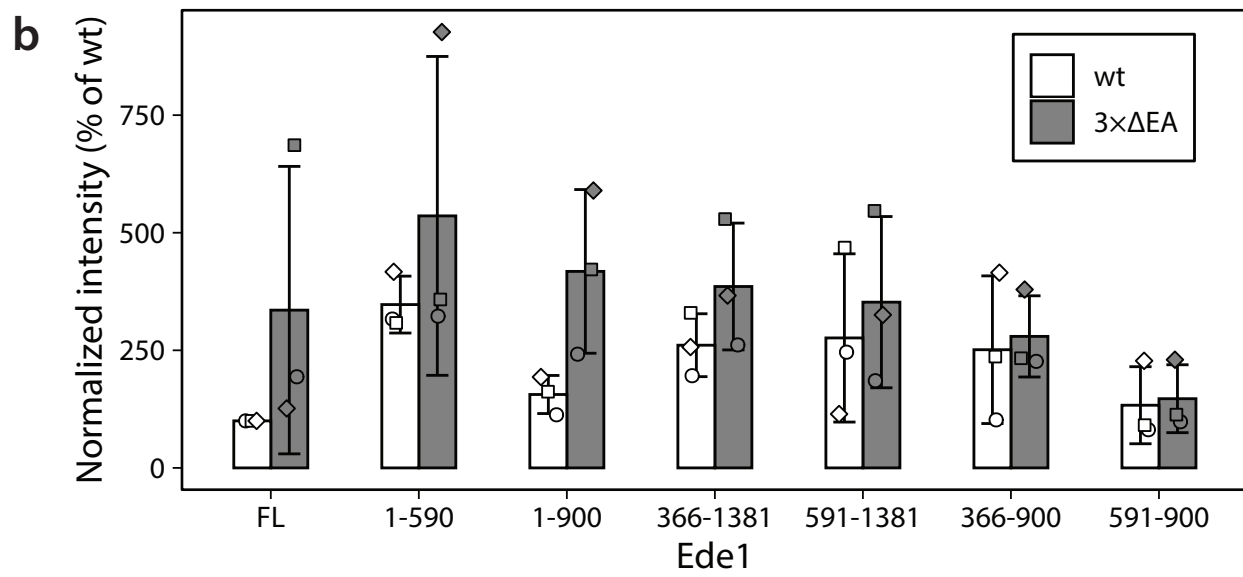

Supplement: supp [file elife_poa_e72865_Figure_5_figure_supplement_1.pdf › elife_poa_e72865_Figure_5_figure_supplement_1.pdf]

Ede1

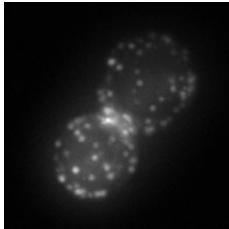

Ede1<sup>ΔPQCC</sup>

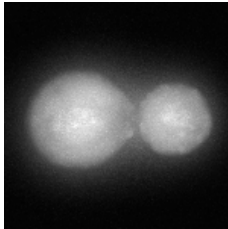

Ede1<sup>WHI3</sup>

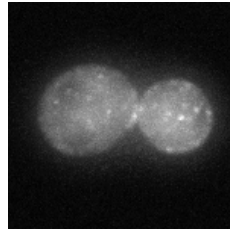

Ede1<sup>FUS</sup>

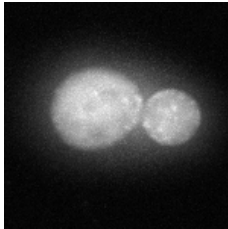

Supplement: supp [file elife_poa_e72865_Figure_8_figure_supplement_1.pdf › elife_poa_e72865_Figure_8_figure_supplement_1.pdf]
